# Supplementary material for: Delayed Recognition: A Co-Citation Perspective
Source: Front Res Metr Anal. 2021 Feb 19;5:577131. doi: 10.3389/frma.2020.577131 (PMC8028384; doi:10.3389/frma.2020.577131)
Supplement: Supplementary file 1 [file datasheet1.csv]

No	doi-1	doi-2	cc_frequency	pub1_msa	pub2_msa	pub1_title	pub2_title	pub1_authors	pub2_authors	dc
1	10.1103/PhysRevB.10.676	10.1103/PhysRevB.4.1211	132	Physics and Astronomy	Physics and Astronomy	Fundamental energy gap of gan from photoluminescence excitation spectra	Absorption, reflectance, and luminescence of GaN epitaxial layers	Monemar B., Monemar B., Monemar B., Monemar B.	Dingle R., Ilegems M., Stokowski S.E., Sell D.D.	1
2	10.1016/0020-0190(78)90067-4	10.1007/3-540-09519-5_73	139	Computer Science, Computer Science	Mathematics, Computer Science	A probabilistic remark on algebraic program testing	Probabilistic algorithms for sparse polynomials	Lipton R.J., Demillo R.A.	Zippel R., Zippel R.	0
3	10.1016/0020-0190(78)90067-4	10.1145/322217.322225	161	Computer Science, Computer Science, Computer Science, Computer Science, Computer Science	Computer Science, Engineering, Computer Science, Computer Science, Computer Science	A probabilistic remark on algebraic program testing	Fast Probabilistic Algorithms for Verification of Polynomial Identities	Lipton R.J., Demillo R.A.	Schwartz J.T., Schwartz J.T.	0
4	10.1007/BF01908075	10.1109/TPAMI.1979.4766909	147	Social Sciences, Decision Sciences, Decision Sciences, Decision Sciences, Decision Sciences, Decision Sciences, Mathematics, Mathematics, Mathematics, Mathematics, Mathematics, Psychology, Psychology, Psychology, Psychology, Psychology, Social Sciences, Social Sciences, Social Sciences, Social Sciences	Computer Science, Computer Science, Computer Science, Computer Science, Computer Science, Mathematics, Computer Science, Computer Science, Computer Science, Computer Science, Mathematics, Computer Science, Computer Science, Computer Science, Computer Science, Mathematics, Computer Science, Computer Science, Computer Science, Mathematics	Comparing partitions	A Cluster Separation Measure	Hubert L., Arabie P., Hubert L., Arabie P.	Bouldin D.W., Bouldin D.W., Davies D.L., Davies D.L.	0
5	10.1007/BF00310707	10.1144/GSL.SP.1989.042.01.19	103	Earth and Planetary Sciences, Earth and Planetary Sciences, Earth and Planetary Sciences, Earth and Planetary Sciences, Earth and Planetary Sciences, Earth and Planetary Sciences	Environmental Science, Environmental Science, Engineering, Earth and Planetary Sciences, Engineering, Earth and Planetary Sciences	Phase equilibria and melt productivity in the pelitic system: implications for the origin of peraluminous granitoids and aluminous granulites	Chemical and isotopic systematics of oceanic basalts: Implications for mantle composition and processes	Johnston A.D., Patino Douce A.E., Johnston A.D., Patino Douce A.E.	Sun S.-S., Sun S.-S., McDonough W.F., McDonough W.F.	0
6	10.1016/0165-0114(86)90077-1	10.1016/S0165-0114(86)80034-3	179	Mathematics, Mathematics, Mathematics, Computer Science, Computer Science, Mathematics, Mathematics, Computer Science, Computer Science, Computer Science, Computer Science, Mathematics, Mathematics, Computer Science	Decision Sciences, Computer Science, Mathematics, Computer Science, Computer Science, Computer Science, Computer Science, Decision Sciences, Decision Sciences, Engineering, Mathematics, Engineering, Decision Sciences, Computer Science	Interval valued fuzzy sets based on normal forms	Intuitionistic fuzzy sets	Turksen I.B.	Atanassov K.T.	0
7	10.1007/BF01645742	10.1007/BF01208266	141	Physics and Astronomy, Mathematics, Physics and Astronomy, Physics and Astronomy, Mathematics, Physics and Astronomy	Physics and Astronomy, Mathematics, Physics and Astronomy, Mathematics, Physics and Astronomy, Mathematics	The four laws of black hole mechanics	Thermodynamics of black holes in anti-de Sitter space	Hawking S.W., Bardeen J.M., Carter B., Hawking S.W., Bardeen J.M., Carter B.	Hawking S.W., Hawking S.W., Hawking S.W., Page D.N., Page D.N., Page D.N.	1
8	10.1016/0550-3213(79)90192-5	10.1016/0370-2693(83)90170-3	173	Physics and Astronomy	Physics and Astronomy	A new six-dimensional approach to the Weinberg-Salam model	Dynamical mass generation by compact extra dimensions	Manton N.S.	Hosotani Y.	1
9	10.1007/BF01415558	10.1103/PhysRevLett.44.912	455	Physics and Astronomy	Physics and Astronomy	See-saw neutrino masses induced by a triplet of leptons	Neutrino mass and spontaneous parity nonconservation	He X.-G., Foot R., Lew H., Joshi G.C., He X.-G., Foot R., Lew H., Joshi G.C.	Senjanovic G., Senjanovic G., Senjanovic G., Senjanovic G., Mohapatra R.N., Mohapatra R.N., Mohapatra R.N., Mohapatra R.N.	0
10	10.1007/BF01415558	10.1103/PhysRevD.23.165	371	Physics and Astronomy, Physics and Astronomy	Physics and Astronomy, Physics and Astronomy	See-saw neutrino masses induced by a triplet of leptons	Neutrino masses and mixings in gauge models with spontaneous parity violation	He X.-G., Foot R., Lew H., Joshi G.C., He X.-G., Foot R., Lew H., Joshi G.C.	Senjanovic G., Senjanovic G., Senjanovic G., Senjanovic G., Mohapatra R.N., Mohapatra R.N., Mohapatra R.N., Mohapatra R.N.	0
11	10.1016/0047-2727(73)90013-3	10.2307/1882010	304	Economics, Econometrics and Finance, Economics, Econometrics and Finance	Economics, Econometrics and Finance, Economics, Econometrics and Finance	Higher education as a filter	Job market signaling	Arrow K.J.	Spence M.	0
12	10.1016/0047-2727(76)90014-1	10.2307/2296698	227	Economics, Econometrics and Finance, Economics, Econometrics and Finance	Economics, Econometrics and Finance, Economics, Econometrics and Finance	Effluent charges and licenses under uncertainty	Prices vs. Quantities	Spence M., Roberts M.J.	Weitzman M.L., Weitzman M.L.	0
13	10.1063/1.443164	10.1063/1.438980	298	Chemistry, Physics and Astronomy, Physics and Astronomy, Chemistry	Physics and Astronomy, Chemistry, Physics and Astronomy, Chemistry	A full coupled-cluster singles and doubles model: The inclusion of disconnected triples	Contracted Gaussian basis sets for molecular calculations. I. Second row atoms, Z=11-18	Bartlett R.J., Purvis III G.D., Bartlett R.J., Purvis III G.D.	Chandler G.S., Chandler G.S., McLean A.D., McLean A.D.	0
14	10.1111/j.1540-6261.1973.tb01415.x	10.1111/j.1540-6261.1984.tb03646.x	205	Business, Management and Accounting, Economics, Econometrics and Finance, Economics, Econometrics and Finance, Economics, Econometrics and Finance, Economics, Econometrics and Finance, Economics, Econometrics and Finance, Economics, Econometrics and Finance, Business, Management and Accounting, Business, Management and Accounting	Economics, Econometrics and Finance, Economics, Econometrics and Finance, Economics, Econometrics and Finance, Business, Management and Accounting, Economics, Econometrics and Finance, Economics, Econometrics and Finance, Business, Management and Accounting, Economics, Econometrics and Finance, Business, Management and Accounting	A STATE‐PREFERENCE MODEL OF OPTIMAL FINANCIAL LEVERAGE	The Capital Structure Puzzle	Litzenberger R.H., Kraus A.	MYERS S.C., MYERS S.C.	0
15	10.1016/0550-3213(73)90622-6	10.1103/PhysRevD.10.1823	126	Physics and Astronomy	Physics and Astronomy	Interacting-string picture of dual-resonance models	Field theory of relativistic strings. II. Loops and Pomerons	Mandelstam S., Mandelstam S.	Kikkawa K., Kaku M.	0
16	10.1016/0038-0717(87)90037-X	10.1016/0003-2697(87)90612-9	182	Immunology and Microbiology, Agricultural and Biological Sciences, Agricultural and Biological Sciences, Immunology and Microbiology, Agricultural and Biological Sciences, Immunology and Microbiology, Agricultural and Biological Sciences, Immunology and Microbiology	Biochemistry, Genetics and Molecular Biology, Biochemistry, Genetics and Molecular Biology, Biochemistry, Genetics and Molecular Biology, Biochemistry, Genetics and Molecular Biology, Biochemistry, Genetics and Molecular Biology, Biochemistry, Genetics and Molecular Biology, Biochemistry, Genetics and Molecular Biology, Biochemistry, Genetics and Molecular Biology	Microbial cyanide production in the rhizosphere in relation to potato yield reduction and Pseudomonas SPP-mediated plant growth-stimulation	Universal chemical assay for the detection and determination of siderophores	Schippers B., Bakker A.W., Schippers B., Bakker A.W.	Schwyn B., Schwyn B., Neilands J.B., Neilands J.B.	0
17	10.1080/01621459.1987.10478441	10.1093/biomet/70.1.41	221	Mathematics, Mathematics, Mathematics, Mathematics, Mathematics, Decision Sciences, Decision Sciences, Decision Sciences, Decision Sciences, Decision Sciences, Decision Sciences, Mathematics	Agricultural and Biological Sciences, Mathematics, Mathematics, Decision Sciences, Agricultural and Biological Sciences, Mathematics, Mathematics, Mathematics, Decision Sciences, Agricultural and Biological Sciences, Agricultural and Biological Sciences, Mathematics	Model-based direct adjustment	The central role of the propensity score in observational studies for causal effects	Rosenbaum P.R., Rosenbaum P.R.	Rosenbaum P.R., Rubin D.B.	1
18	10.1063/1.438357	10.1103/PhysRevB.37.785	216	Physics and Astronomy, Chemistry	Physics and Astronomy, Physics and Astronomy	Electronic structure of homoleptic transition metal hydrides: TiH 4, VH4, CrH4, MnH4, FeH4, CoH4, and NiH4	Development of the Colle-Salvetti correlation-energy formula into a functional of the electron density	Pitzer R.M., Hood D.M., Schaefer III H.F., Pitzer R.M., Hood D.M., Schaefer III H.F., Pitzer R.M., Hood D.M., Schaefer III H.F.	Parr R.G., Parr R.G., Parr R.G., Lee C., Lee C., Lee C., Yang W., Yang W., Yang W.	0
19	10.1063/1.438357	10.1103/PhysRevA.38.3098	219	Physics and Astronomy, Chemistry	Physics and Astronomy, Physics and Astronomy	Electronic structure of homoleptic transition metal hydrides: TiH 4, VH4, CrH4, MnH4, FeH4, CoH4, and NiH4	Density-functional exchange-energy approximation with correct asymptotic behavior	Pitzer R.M., Hood D.M., Schaefer III H.F.	Becke A.D., Becke A.D., Becke A.D.	0
20	10.1063/1.464913	10.1016/0022-2860(90)80287-T	217	Physics and Astronomy, Chemistry, Physics and Astronomy, Chemistry, Chemistry, Chemistry, Physics and Astronomy, Physics and Astronomy	Chemistry, Chemistry, Chemistry, Chemistry, Chemistry, Chemistry, Chemistry, Chemistry	Density-functional thermochemistry. III. The role of exact exchange	Molvib - A flexible program for force field calculations	Becke A.D.	Sundius T.	0
21	10.1016/0009-2614(80)80041-8	10.1063/1.438208	314	Chemistry, Physics and Astronomy, Chemistry, Physics and Astronomy	Chemistry, Chemistry, Physics and Astronomy, Physics and Astronomy	Natural abundance nitrogen-15 NMR by enhanced heteronuclear spectroscopy	Investigation of exchange processes by two-dimensional NMR spectroscopy	Bodenhausen G., Ruben D.J., Bodenhausen G., Ruben D.J., Bodenhausen G., Ruben D.J., Bodenhausen G., Ruben D.J.	Ernst R.R., Ernst R.R., Meier B.H., Meier B.H., Bachmann P., Bachmann P., Jeener J., Jeener J.	0
22	10.1103/PhysRevLett.65.353	10.1103/PhysRevB.13.5188	319	Physics and Astronomy	Physics and Astronomy	Special quasirandom structures	Special points for Brillouin-zone integrations	Bernard J.E., Ferreira L.G., Wei S.-H., Zunger A., Bernard J.E., Ferreira L.G., Wei S.-H., Zunger A.	Monkhorst H.J., Monkhorst H.J., Monkhorst H.J., Monkhorst H.J., Pack J.D., Pack J.D., Pack J.D., Pack J.D.	0
23	10.1103/PhysRevD.22.2860	10.1016/0370-2693(88)91584-5	173	Physics and Astronomy, Physics and Astronomy	Physics and Astronomy, Physics and Astronomy	Neutrino masses, mixings, and oscillations in SU(2)×U(1) models of electroweak interactions	Model of ""calculable"" Majorana neutrino masses	Li L.-F., Cheng T.P.	Babu K.S., Babu K.S.	1
24	10.1103/PhysRevD.22.2860	10.1016/0370-2693(80)90825-4	329	Physics and Astronomy, Physics and Astronomy	Physics and Astronomy, Physics and Astronomy	Neutrino masses, mixings, and oscillations in SU(2)×U(1) models of electroweak interactions	Neutrino mass problem and gauge hierarchy	Li L.-F., Cheng T.P., Li L.-F., Cheng T.P.	Magg M., Magg M., Wetterich Ch., Wetterich Ch.	0
25	10.1103/PhysRevD.22.2860	10.1103/PhysRevD.23.165	438	Physics and Astronomy, Physics and Astronomy, Physics and Astronomy, Physics and Astronomy	Physics and Astronomy, Physics and Astronomy, Physics and Astronomy, Physics and Astronomy	Neutrino masses, mixings, and oscillations in SU(2)×U(1) models of electroweak interactions	Neutrino masses and mixings in gauge models with spontaneous parity violation	Li L.-F., Cheng T.P., Li L.-F., Cheng T.P.	Mohapatra R.N., Mohapatra R.N., Senjanovic G., Senjanovic G.	0
26	10.1016/0378-4266(85)90025-1	10.1287/mnsc.30.9.1078	204	Economics, Econometrics and Finance, Economics, Econometrics and Finance, Economics, Econometrics and Finance, Economics, Econometrics and Finance	Decision Sciences, Business, Management and Accounting, Decision Sciences, Business, Management and Accounting	Bank branch operating efficiency. Evaluation with Data Envelopment Analysis	SOME MODELS FOR ESTIMATING TECHNICAL AND SCALE INEFFICIENCIES IN DATA ENVELOPMENT ANALYSIS.	Gold F., Sherman H.D., Gold F., Sherman H.D., Gold F., Sherman H.D.	Banker R.D., Banker R.D., Cooper W.W., Cooper W.W., Charnes A., Charnes A.	0
27	10.1037/0021-9010.71.3.500	10.1037/0022-3514.51.6.1173	397	Psychology, Psychology	Psychology, Social Sciences	Perceived Organizational Support	The Moderator-Mediator Variable Distinction in Social Psychological Research. Conceptual, Strategic, and Statistical Considerations	Hutchison S., Sowa D., Huntington R., Eisenberger R., Hutchison S., Sowa D., Huntington R., Eisenberger R.	Baron R.M., Baron R.M., Baron R.M., Baron R.M., Kenny D.A., Kenny D.A., Kenny D.A., Kenny D.A.	0
28	10.1103/PhysRevB.12.905	10.1103/PhysRevB.13.5188	182	Materials Science, Physics and Astronomy	Physics and Astronomy, Physics and Astronomy	Transition temperature of strong-coupled superconductors reanalyzed	Special points for Brillouin-zone integrations	Allen P.B., Dynes R.C., Allen P.B., Dynes R.C.	Pack J.D., Pack J.D., Monkhorst H.J., Monkhorst H.J.	0
29	10.1524/anly.1985.5.4.301	10.2140/pjm.1993.160.43	150	Mathematics, Mathematics, Mathematics	Mathematics, Mathematics, Mathematics	On statistical convergence	Lacunary statistical convergence	Fridy J.A., Fridy J.A.	Fridy J.A., Orhan C.	1
30	10.1016/0160-7383(82)90049-4	10.1016/0160-7383(77)90037-8	235	Business, Management and Accounting, Social Sciences, Social Sciences, Business, Management and Accounting	Business, Management and Accounting, Social Sciences, Business, Management and Accounting, Social Sciences	Toward a social psychological theory of tourism motivation: A rejoinder	Anomie, ego-enhancement and tourism	Iso-Ahola S.E.	Dann G.M.S.	0
31	10.1016/0160-7383(82)90049-4	10.1016/0160-7383(81)90082-7	207	Business, Management and Accounting, Social Sciences, Business, Management and Accounting, Social Sciences	Business, Management and Accounting, Business, Management and Accounting, Social Sciences, Social Sciences	Toward a social psychological theory of tourism motivation: A rejoinder	Tourist motivation an appraisal	Iso-Ahola S.E.	Dann G.M.S.	1
32	10.1016/0160-7383(82)90049-4	10.1016/0160-7383(79)90004-5	350	Social Sciences, Social Sciences, Business, Management and Accounting, Business, Management and Accounting	Business, Management and Accounting, Social Sciences, Social Sciences, Business, Management and Accounting	Toward a social psychological theory of tourism motivation: A rejoinder		Iso-Ahola S.E.	Crompton J.L.	0
33	10.1016/0037-0738(88)90137-6	10.1086/628815	102	Earth and Planetary Sciences, Earth and Planetary Sciences	Earth and Planetary Sciences, Earth and Planetary Sciences	The CIW index: A new chemical index of weathering	Plate tectonics and geochemical composition of sandstones.	Harnois L.	Bhatia M.R.	0
34	10.1016/0037-0738(88)90137-6		179	Earth and Planetary Sciences, Earth and Planetary Sciences, Earth and Planetary Sciences, Earth and Planetary Sciences	Earth and Planetary Sciences, Environmental Science, Earth and Planetary Sciences, Environmental Science	The CIW index: A new chemical index of weathering	The Continental Crust: its Composition and Evolution. An Examination of the Geochemical Record Preserved in Sedimentary Rocks.	Harnois L., Harnois L.	Taylor S.R., McLennan S.M.	0
35	10.1016/0037-0738(88)90137-6	10.1007/BF00375292	135	Earth and Planetary Sciences, Earth and Planetary Sciences, Earth and Planetary Sciences, Earth and Planetary Sciences, Earth and Planetary Sciences, Earth and Planetary Sciences, Earth and Planetary Sciences, Earth and Planetary Sciences	Earth and Planetary Sciences, Earth and Planetary Sciences, Earth and Planetary Sciences, Environmental Science, Earth and Planetary Sciences, Environmental Science, Earth and Planetary Sciences, Earth and Planetary Sciences	The CIW index: A new chemical index of weathering	Trace element characteristics of graywackes and tectonic setting discrimination of sedimentary basins	Harnois L., Harnois L.	Crook K.A.W., Bhatia M.R.	0
36	10.1016/0037-0738(88)90137-6	10.1086/629071	113	Earth and Planetary Sciences, Earth and Planetary Sciences	Earth and Planetary Sciences, Earth and Planetary Sciences	The CIW index: A new chemical index of weathering	Determination of tectonic setting of sandstone- mudstone suites using SiO2 content and K2O/Na2O ratio.	Harnois L., Harnois L.	Roser B.P., Korsch R.J.	0
37	10.1016/0037-0738(88)90137-6	10.1016/0009-2541(93)90140-E	109	Earth and Planetary Sciences, Earth and Planetary Sciences, Earth and Planetary Sciences, Earth and Planetary Sciences	Earth and Planetary Sciences, Earth and Planetary Sciences, Earth and Planetary Sciences, Earth and Planetary Sciences	The CIW index: A new chemical index of weathering	Chemical composition and evolution of the upper continental crust: Contrasting results from surface samples and shales	Harnois L.	Condie K.C.	1
38	10.1016/0037-0738(88)90137-6	10.1016/0016-7037(84)90408-3	162	Earth and Planetary Sciences, Earth and Planetary Sciences	Earth and Planetary Sciences, Earth and Planetary Sciences	The CIW index: A new chemical index of weathering	Prediction of some weathering trends of plutonic and volcanic rocks based on thermodynamic and kinetic considerations	Harnois L., Harnois L.	Young G.M., Nesbitt H.W.	0
39	10.1016/0160-7383(77)90037-8	10.1016/0160-7383(81)90082-7	249	Business, Management and Accounting, Business, Management and Accounting, Social Sciences, Social Sciences	Business, Management and Accounting, Social Sciences, Business, Management and Accounting, Social Sciences	Anomie, ego-enhancement and tourism	Tourist motivation an appraisal	Dann G.M.S.	Dann G.M.S.	1
40	10.1103/PhysRevD.9.1444	10.1103/PhysRevD.1.1376	191	Physics and Astronomy, Physics and Astronomy	Physics and Astronomy, Physics and Astronomy	Sum rule for deep-inelastic electroproduction from polarized protons	Inelastic scattering of polarized leptons from polarized nucleons	Jaffe R., Ellis J.	Bjorken J.D., Bjorken J.D.	1
41	10.1007/BF02414780		105	Earth and Planetary Sciences, Environmental Science	Medicine, Medicine	Problems in the assessment of heavy-metal levels in estuaries and the formation of a pollution index	Heavy metals in the sediments of the Rhine river. Changes since 1971	Wilson J.G., Jeffrey D.W., Harris C.R., Tomlinson D.L.	Mueller G., Mueller G., Mueller G., Mueller G.	0
42	10.1007/BF02414780	10.1016/0043-1354(80)90143-8	357	Earth and Planetary Sciences, Environmental Science, Earth and Planetary Sciences, Earth and Planetary Sciences, Earth and Planetary Sciences, Environmental Science, Environmental Science, Environmental Science	Environmental Science, Environmental Science, Environmental Science, Environmental Science, Environmental Science, Environmental Science, Environmental Science, Environmental Science	Problems in the assessment of heavy-metal levels in estuaries and the formation of a pollution index	An ecological risk index for aquatic pollution control.a sedimentological approach	Wilson J.G., Jeffrey D.W., Harris C.R., Tomlinson D.L.	Hakanson L., Hakanson L., Hakanson L., Hakanson L.	0
43	10.1103/PhysRevLett.72.3439	10.1103/PhysRevD.23.1693	192	Physics and Astronomy	Physics and Astronomy	Statistical distance and the geometry of quantum states	Quantum-mechanical noise in an interferometer	Braunstein S.L., Caves C.M.	Caves C.M., Caves C.M.	0
44	10.1021/ja00443a030	10.1063/1.555808	128	Chemical Engineering, Chemistry, Chemistry, Chemical Engineering, Biochemistry, Genetics and Molecular Biology, Biochemistry, Genetics and Molecular Biology, Biochemistry, Genetics and Molecular Biology, Chemical Engineering, Chemical Engineering, Chemical Engineering, Chemical Engineering, Chemistry	Chemistry, Chemistry, Chemistry, Physics and Astronomy, Chemistry, Chemistry, Physics and Astronomy, Chemistry, Chemistry, Chemistry, Physics and Astronomy, Physics and Astronomy	Rate Constants and Mechanism of Reaction of SO4 with Aromatic Compounds	Rate Constants for Reactions of Inorganic Radicals in Aqueous Solution	Madhavan V., Zemel H., Fessenden R.W., Neta P., Madhavan V., Zemel H., Fessenden R.W., Neta P., Madhavan V., Zemel H., Fessenden R.W., Neta P.	Ross A.B., Ross A.B., Ross A.B., Ross A.B., Huie R.E., Huie R.E., Huie R.E., Huie R.E., Neta P., Neta P., Neta P., Neta P.	0
45	10.1016/0375-9601(79)90150-6	10.1016/0375-9601(76)90101-8	163	Physics and Astronomy	Physics and Astronomy	An equation for hyperchaos	An equation for continuous chaos	Rossler O.E.	Rossler O.E.	1
46	10.1016/0304-405X(77)90005-8	10.1016/0304-405X(79)90015-1	196	Business, Management and Accounting, Economics, Econometrics and Finance, Economics, Econometrics and Finance, Economics, Econometrics and Finance, Economics, Econometrics and Finance, Economics, Econometrics and Finance, Economics, Econometrics and Finance, Economics, Econometrics and Finance, Economics, Econometrics and Finance, Business, Management and Accounting, Business, Management and Acco…	Business, Management and Accounting, Economics, Econometrics and Finance, Economics, Econometrics and Finance, Business, Management and Accounting, Business, Management and Accounting, Economics, Econometrics and Finance, Economics, Econometrics and Finance, Business, Management and Accounting, Business, Management and Accounting, Economics, Econometrics and Finance, Economics, Econometrics and F…	Options: A Monte Carlo approach	Option pricing: A simplified approach	Boyle P.P., Boyle P.P., Boyle P.P.	Ross S.A., Rubinstein M., Cox J.C.	0
47	10.1016/0304-405X(77)90005-8		294	Business, Management and Accounting, Business, Management and Accounting, Economics, Econometrics and Finance, Economics, Econometrics and Finance	Economics, Econometrics and Finance, Economics, Econometrics and Finance, Economics, Econometrics and Finance, Economics, Econometrics and Finance	Options: A Monte Carlo approach	The pricing of options and corporate liabilities	Boyle P.P., Boyle P.P.	Black F., Scholes M.	1
48	10.1063/1.1665584	10.1103/PhysRevA.4.2019	276	Mathematics, Physics and Astronomy	Physics and Astronomy, Physics and Astronomy	Quantum many-body problem in one dimension: Ground state	Exact results for a quantum many-body problem in one dimension	Sutherland B.	Sutherland B.	1
49	10.1086/115629	10.1093/imamat/18.2.189	163	Physics and Astronomy, Physics and Astronomy, Physics and Astronomy, Earth and Planetary Sciences, Earth and Planetary Sciences, Physics and Astronomy, Earth and Planetary Sciences, Earth and Planetary Sciences, Earth and Planetary Sciences, Earth and Planetary Sciences, Earth and Planetary Sciences, Physics and Astronomy, Physics and Astronomy, Physics and Astronomy	Mathematics, Social Sciences, Social Sciences, Biochemistry, Genetics and Molecular Biology, Environmental Science, Mathematics, Social Sciences, Social Sciences, Mathematics, Mathematics, Mathematics, Mathematics, Environmental Science, Biochemistry, Genetics and Molecular Biology	Symmetric multistep methods for the numerical integration of planetary orbits	Symmetric multistip methods for periodic initial value problems	Tremaine S., Quinlan G.D., Tremaine S., Quinlan G.D.	Watson I.A., Watson I.A., Lambert J.D., Lambert J.D.	1
50	10.1103/PhysRevLett.66.1107	10.1103/PhysRevLett.60.1351	277	Physics and Astronomy	Physics and Astronomy	Realization of a measurement of a weak value	How the result of a measurement of a component of the spin of a spin-1/2 particle can turn out to be 100	Story J.G., Hulet R.G., Ritchie N.W.M., Story J.G., Hulet R.G., Ritchie N.W.M., Story J.G., Hulet R.G., Ritchie N.W.M.	Aharonov Y., Aharonov Y., Aharonov Y., Vaidman L., Vaidman L., Vaidman L., Albert D.Z., Albert D.Z., Albert D.Z.	1
51	10.1016/0375-9601(87)90222-2	10.1016/0375-9601(88)90840-7	400	Physics and Astronomy	Physics and Astronomy	How to differentiate between non-orthogonal states	Overlap and distinguishability of quantum states	Ivanovic I.D.	Dieks D.	1
52	10.2113/gsecongeo.67.5.551	10.1016/0040-1951(81)90213-4	152	Earth and Planetary Sciences, Earth and Planetary Sciences, Earth and Planetary Sciences, Earth and Planetary Sciences, Earth and Planetary Sciences, Earth and Planetary Sciences, Earth and Planetary Sciences, Earth and Planetary Sciences	Earth and Planetary Sciences, Earth and Planetary Sciences, Earth and Planetary Sciences, Earth and Planetary Sciences, Earth and Planetary Sciences, Earth and Planetary Sciences, Earth and Planetary Sciences, Earth and Planetary Sciences	Systematics of sulfur and carbon isotopes in hydrothermal ore deposits	Plumbotectonics-the model	Ohmoto H., Ohmoto H.	Zartman R.E., Doe B.R.	0
53	10.1016/0165-0114(78)90001-5	10.1016/0165-0114(86)90014-X	160	Computer Science, Computer Science, Computer Science, Computer Science, Computer Science, Decision Sciences, Decision Sciences, Decision Sciences, Decision Sciences, Engineering, Engineering, Mathematics, Mathematics, Computer Science	Computer Science, Computer Science, Mathematics, Computer Science, Mathematics, Computer Science, Mathematics, Computer Science, Mathematics, Computer Science, Mathematics, Computer Science, Mathematics, Mathematics	Decision-making with a fuzzy preference relation	Group decision making with a fuzzy linguistic majority	Orlovsky S.A.	Kacprzyk J.	0
54	10.1016/0165-0114(78)90001-5	10.1016/0165-0114(84)90032-0	256	Engineering, Decision Sciences, Decision Sciences, Computer Science, Computer Science, Computer Science, Computer Science, Computer Science, Computer Science, Decision Sciences, Engineering, Decision Sciences, Mathematics, Mathematics	Mathematics, Mathematics, Computer Science, Mathematics, Computer Science, Mathematics, Computer Science, Mathematics, Computer Science, Mathematics, Computer Science, Computer Science, Computer Science, Mathematics	Decision-making with a fuzzy preference relation	Fuzzy preference orderings in group decision making	Orlovsky S.A.	Tanino T.	0
55	10.1016/S0020-1693(00)95610-X	10.1016/S0003-2670(00)80835-1	115	Chemistry, Chemistry, Biochemistry, Genetics and Molecular Biology, Biochemistry, Genetics and Molecular Biology, Chemistry, Chemistry, Chemistry, Materials Science, Materials Science, Materials Science, Materials Science, Chemistry, Chemistry, Chemistry, Biochemistry, Genetics and Molecular Biology, Biochemistry, Genetics and Molecular Biology	Chemistry, Biochemistry, Genetics and Molecular Biology, Chemistry, Environmental Science, Biochemistry, Genetics and Molecular Biology, Chemistry, Environmental Science, Environmental Science, Chemistry, Chemistry, Biochemistry, Genetics and Molecular Biology, Environmental Science, Chemistry, Chemistry, Biochemistry, Genetics and Molecular Biology, Chemistry	An improved computer program for the computation of formation constants from potentiometric data	Equivalence volumes in potentiometric titrations	Gans P., Vacca A., Sabatini A.	Gran G., Gran G., Gran G.	0
56	10.1016/0375-9601(88)90840-7	10.1016/0375-9601(88)91034-1	394	Physics and Astronomy	Physics and Astronomy	Overlap and distinguishability of quantum states	How to differentiate between non-orthogonal states	Dieks D.	Peres A.	0
57	10.1103/RevModPhys.57.783	10.1063/1.450037	204	Physics and Astronomy, Physics and Astronomy	Chemistry, Physics and Astronomy	Surface-enhanced spectroscopy	Charge-transfer theory of surface enhanced Raman spectroscopy: Herzberg-Teller contributions	Moskovits M., Moskovits M., Moskovits M., Moskovits M.	Lombardi J.R., Xu J., Birke R.L., Lu T.	0
58	10.1103/PhysRevD.15.2752	10.1103/PhysRevD.7.2333	460	Physics and Astronomy, Physics and Astronomy	Physics and Astronomy, Physics and Astronomy	Action integrals and partition functions in quantum gravity	Black holes and entropy	Gibbons G.W., Hawking S.W.	Bekenstein J.D., Bekenstein J.D.	0
59	10.1007/BF00295861	10.1016/0022-0531(75)90050-2	127	Social Sciences, Economics, Econometrics and Finance	Economics, Econometrics and Finance, Economics, Econometrics and Finance	The computational difficulty of manipulating an election	Strategy-proofness and Arrow's conditions: Existence and correspondence theorems for voting procedures and social welfare functions	Bartholdi III J.J., Trick M.A., Tovey C.A.	Satterthwaite M.A., Satterthwaite M.A., Satterthwaite M.A.	1
60	10.1007/BF01209312	10.1016/0375-9601(76)90101-8	140	Physics and Astronomy, Mathematics	Physics and Astronomy, Physics and Astronomy	Possible new strange attractors with spiral structure	An equation for continuous chaos	Arneodo A., Tresser C., Coullet P.	Rossler O.E., Rossler O.E., Rossler O.E.	1
61	10.1016/0550-3213(90)90520-N	10.1016/0370-2693(90)91454-J	126	Physics and Astronomy	Physics and Astronomy	Duality rotations in string theory	Duality symmetric formulation of string world sheet dynamics	Duff M.J.	Tseytlin A.A.	0
62	10.1016/0550-3213(90)90520-N	10.1103/PhysRevD.48.2826	127	Physics and Astronomy	Physics and Astronomy	Duality rotations in string theory	Superspace duality in low-energy superstrings	Duff M.J.	Siegel W.	1
63	10.1016/0550-3213(90)90520-N	10.1103/PhysRevD.47.5453	118	Physics and Astronomy	Physics and Astronomy	Duality rotations in string theory	Two-vierbein formalism for string-inspired axionic gravity	Duff M.J.	Siegel W.	1
64	10.1016/0022-1236(82)90048-9	10.1016/0021-9045(89)90041-5	189	Mathematics, Mathematics, Mathematics, Mathematics	Mathematics, Mathematics, Mathematics, Mathematics	On approximation of approximately linear mappings by linear mappings	Solution of a problem of Ulam	Rassias J.M.	Rassias J.M.	0
65	10.1016/0022-1236(82)90048-9	10.1090/S0002-9939-1978-0507327-1	306	Mathematics, Mathematics	Mathematics, Mathematics	On approximation of approximately linear mappings by linear mappings	On the stability of the linear mapping in banach spaces	Rassias J.M.	Rassias T.M.	0
66	10.1016/0022-1236(82)90048-9	10.1155/S016117129100056X	136	Mathematics	Mathematics	On approximation of approximately linear mappings by linear mappings	On Stability of Additive Mappings	Rassias J.M.	Gajda Z.	0
67	10.1103/PhysRevLett.61.2015	10.1103/PhysRevB.23.5632	156	Physics and Astronomy	Physics and Astronomy	Model for a quantum hall effect without landau levels: Condensed-matter realization of the ""parity anomaly""	Quantized Hall conductivity in two dimensions	Haldane F.D.M.	Laughlin R.B.	0
68	10.1103/PhysRevLett.61.2015	10.1103/PhysRevB.14.2239	158	Physics and Astronomy	Physics and Astronomy	Model for a quantum hall effect without landau levels: Condensed-matter realization of the ""parity anomaly""	Energy levels and wave functions of Bloch electrons in rational and irrational magnetic fields	Haldane F.D.M.	Hofstadter D.R.	0
69	10.1103/PhysRevLett.61.2015	10.1103/PhysRevLett.49.405	746	Physics and Astronomy	Physics and Astronomy	Model for a quantum hall effect without landau levels: Condensed-matter realization of the ""parity anomaly""	Quantized hall conductance in a two-Dimensional periodic potential	Haldane F.D.M., Haldane F.D.M., Haldane F.D.M., Haldane F.D.M.	Nightingale M.P., Kohmoto M., Thouless D.J., Den Nijs M.	1
70	10.1103/PhysRevLett.61.2015	10.1103/PhysRevLett.50.1395	150	Physics and Astronomy	Physics and Astronomy	Model for a quantum hall effect without landau levels: Condensed-matter realization of the ""parity anomaly""	Anomalous quantum Hall effect: An incompressible quantum fluid with fractionally charged excitations	Haldane F.D.M.	Laughlin R.B.	0
71	10.1103/PhysRevLett.61.2015	10.1103/PhysRevLett.45.494	373	Physics and Astronomy	Physics and Astronomy	Model for a quantum hall effect without landau levels: Condensed-matter realization of the ""parity anomaly""	New method for high-accuracy determination of the fine-structure constant based on quantized hall resistance	Haldane F.D.M., Haldane F.D.M., Haldane F.D.M.	Pepper M., Dorda G., Klitzing K.V.	1
72	10.1103/PhysRevLett.61.2015	10.1103/PhysRevLett.48.1559	151	Physics and Astronomy	Physics and Astronomy	Model for a quantum hall effect without landau levels: Condensed-matter realization of the ""parity anomaly""	Two-dimensional magnetotransport in the extreme quantum limit	Haldane F.D.M., Haldane F.D.M., Haldane F.D.M.	Tsui D.C., Gossard A.C., Stormer H.L.	0
73		10.1130/0016-7606(1989)101<0635:TDOG>2.3.CO;2	111	Agricultural and Biological Sciences, Agricultural and Biological Sciences, Environmental Science, Environmental Science, Earth and Planetary Sciences, Earth and Planetary Sciences, Earth and Planetary Sciences, Earth and Planetary Sciences, Earth and Planetary Sciences, Earth and Planetary Sciences, Earth and Planetary Sciences, Earth and Planetary Sciences, Agricultural and Biological Sciences	Earth and Planetary Sciences, Earth and Planetary Sciences, Earth and Planetary Sciences, Earth and Planetary Sciences, Earth and Planetary Sciences, Earth and Planetary Sciences, Earth and Planetary Sciences, Earth and Planetary Sciences, Earth and Planetary Sciences, Earth and Planetary Sciences, Earth and Planetary Sciences, Earth and Planetary Sciences, Earth and Planetary Sciences	A model for trondhjemite-tonalite-dacite genesis and crustal growth via slab melting: Archean to modern comparisons	Tectonic discrimination of granitoids	Defant M.J., Drummond M.S., Defant M.J., Drummond M.S.	Maniar P.D., Maniar P.D., Piccoli P.M., Piccoli P.M.	0
74	10.1080/00268977400100171	10.1063/1.448800	314	Biochemistry, Genetics and Molecular Biology, Physics and Astronomy, Biochemistry, Genetics and Molecular Biology, Chemistry, Chemistry, Biochemistry, Genetics and Molecular Biology, Physics and Astronomy, Biochemistry, Genetics and Molecular Biology	Chemistry, Physics and Astronomy, Physics and Astronomy, Chemistry, Physics and Astronomy, Chemistry, Chemistry, Physics and Astronomy	Accuracy of AHn equilibrium geometries by single determinant molecular orbital theory	Ab initio effective core potentials for molecular calculations. Potentials for main group elements Na to Bi	Pople J.A., Hariharan P.C., Pople J.A., Hariharan P.C.	Hay P.J., Hay P.J., Wadt W.R., Wadt W.R.	0
75	10.1080/00268977400100171	10.1063/1.448975	375	Physics and Astronomy, Biochemistry, Genetics and Molecular Biology, Chemistry, Biochemistry, Genetics and Molecular Biology, Biochemistry, Genetics and Molecular Biology, Chemistry, Biochemistry, Genetics and Molecular Biology, Physics and Astronomy	Chemistry, Chemistry, Physics and Astronomy, Physics and Astronomy, Chemistry, Chemistry, Physics and Astronomy, Physics and Astronomy	Accuracy of AHn equilibrium geometries by single determinant molecular orbital theory	Ab initio effective core potentials for molecular calculations. Potentials for K to Au including the outermost core orbitale	Pople J.A., Hariharan P.C., Pople J.A., Hariharan P.C.	Wadt W.R., Wadt W.R., Hay P.J., Hay P.J.	0
76	10.1080/00268977400100171	10.1063/1.448799	351	Biochemistry, Genetics and Molecular Biology, Physics and Astronomy, Physics and Astronomy, Chemistry, Chemistry, Biochemistry, Genetics and Molecular Biology, Biochemistry, Genetics and Molecular Biology, Biochemistry, Genetics and Molecular Biology	Chemistry, Physics and Astronomy, Chemistry, Physics and Astronomy, Chemistry, Physics and Astronomy, Chemistry, Physics and Astronomy	Accuracy of AHn equilibrium geometries by single determinant molecular orbital theory	Ab initio effective core potentials for molecular calculations. Potentials for the transition metal atoms Sc to Hg	Pople J.A., Hariharan P.C., Pople J.A., Hariharan P.C.	Wadt W.R., Wadt W.R., Hay P.J., Hay P.J.	0
77	10.1080/00268977400100171	10.1002/jcc.540040303	275	Physics and Astronomy, Biochemistry, Genetics and Molecular Biology, Biochemistry, Genetics and Molecular Biology, Biochemistry, Genetics and Molecular Biology, Biochemistry, Genetics and Molecular Biology, Chemistry, Chemistry, Physics and Astronomy	Mathematics, Chemistry, Mathematics, Mathematics, Chemistry, Chemistry, Mathematics, Chemistry	Accuracy of AHn equilibrium geometries by single determinant molecular orbital theory	Efficient diffuse function‐augmented basis sets for anion calculations. III. The 3‐21+G basis set for first‐row elements, Li–F	Pople J.A., Hariharan P.C., Pople J.A., Hariharan P.C., Pople J.A., Hariharan P.C., Pople J.A., Hariharan P.C.	Schleyer P.V.R., Schleyer P.V.R., Spitznagel G.W., Spitznagel G.W., Chandrasekhar J., Chandrasekhar J., Clark T., Clark T.	0
78	10.1103/PhysRevD.22.2323	10.1016/0003-4916(79)90237-9	144	Physics and Astronomy	Physics and Astronomy	Klein-Gordon equation and rotating black holes	Instabilities of massive scalar perturbations of a rotating black hole	Detweiler S., Detweiler S.	Zouros T.J.M., Eardley D.M.	1
79	10.1021/j100384a024	10.1016/0022-2860(90)80287-T	119	Chemistry, Engineering, Chemistry, Chemistry, Chemistry, Engineering, Engineering, Engineering	Chemistry, Chemistry, Chemistry, Chemistry, Chemistry, Chemistry, Chemistry, Chemistry	Ab initio vibrational Raman and Raman optical activity spectra	Molvib - A flexible program for force field calculations	Polavarapu P.L.	Sundius T.	0
80	10.1016/0550-3213(81)90582-4	10.1016/0550-3213(83)90652-1	175	Physics and Astronomy	Physics and Astronomy	Supersymmetric technicolor	Geometric hierarchy	Srednicki M., Fischler W., Dine M., Srednicki M., Fischler W., Dine M.	Raby S., Raby S., Raby S., Dimopoulos S., Dimopoulos S., Dimopoulos S.	1
81	10.1016/0550-3213(81)90442-9	10.1103/PhysRevD.10.4262	303	Physics and Astronomy	Physics and Astronomy	Topology of the gauge condition and new confinement phases in non-abelian gauge theories	Strings, monopoles, and gauge fields	Hooft G.'t.	Nambu Y.	0
82	10.1016/0305-1978(77)90021-7	10.1099/00207713-24-1-54	204	Agricultural and Biological Sciences, Agricultural and Biological Sciences, Biochemistry, Genetics and Molecular Biology, Biochemistry, Genetics and Molecular Biology	Immunology and Microbiology, Immunology and Microbiology, Immunology and Microbiology, Immunology and Microbiology	Chemotaxonomy of aerobic Actinomycetes: Phospholipid composition	Nocardia coeliaca, Nocardia autotrophica, and the nocardin strain	Lechevalier M.P., De Bievre C., Lechevalier H., Lechevalier M.P., De Bievre C., Lechevalier H., Lechevalier M.P., De Bievre C., Lechevalier H., Lechevalier M.P., De Bievre C., Lechevalier H.	Gordon R.E., Gordon R.E., Gordon R.E., Barnett D.A., Barnett D.A., Barnett D.A., Handerhan J.E., Handerhan J.E., Handerhan J.E., Hor Nay Pang C., Hor Nay Pang C., Hor Nay Pang C.	0
83	10.1016/0305-1978(77)90021-7	10.1016/0167-7012(84)90018-6	287	Biochemistry, Genetics and Molecular Biology, Agricultural and Biological Sciences, Agricultural and Biological Sciences, Agricultural and Biological Sciences, Biochemistry, Genetics and Molecular Biology, Biochemistry, Genetics and Molecular Biology	Biochemistry, Genetics and Molecular Biology, Immunology and Microbiology, Medicine, Biochemistry, Genetics and Molecular Biology, Immunology and Microbiology, Medicine	Chemotaxonomy of aerobic Actinomycetes: Phospholipid composition	An integrated procedure for the extraction of bacterial isoprenoid quinones and polar lipids	Lechevalier M.P., De Bievre C., Lechevalier H., Lechevalier M.P., De Bievre C., Lechevalier H., Lechevalier M.P., De Bievre C., Lechevalier H., Lechevalier M.P., De Bievre C., Lechevalier H., Lechevalier M.P., De Bievre C., Lechevalier H., Lechevalier M.P., De Bievre C., Lechevalier H., Lechevalier M.P., De Bievre C., Lechevalier H.	Schaal A., Schaal A., Schaal A., Athalye M., Athalye M., Athalye M., Alderson G., Alderson G., Alderson G., Goodfellow M., Goodfellow M., Goodfellow M., Parlett J.H., Parlett J.H., Parlett J.H., O'Donnell A.G., O'Donnell A.G., O'Donnell A.G., Minnikin D.E., Minnikin D.E., Minnikin D.E.	0
84	10.1016/1048-9843(90)90009-7	10.1037/0033-2909.103.3.411	212	Social Sciences, Business, Management and Accounting, Business, Management and Accounting, Psychology	Psychology, Psychology, Psychology, Psychology	Transformational leader behaviors and their effects on followers' trust in leader, satisfaction, and organizational citizenship behaviors	Structural Equation Modeling in Practice: A Review and Recommended Two-Step Approach	Fetter R., MacKenzie S.B., Podsakoff P.M., Moorman R.H., Fetter R., MacKenzie S.B., Podsakoff P.M., Moorman R.H.	Gerbing D.W., Gerbing D.W., Gerbing D.W., Gerbing D.W., Anderson J.C., Anderson J.C., Anderson J.C., Anderson J.C.	0
85	10.1016/0165-0114(89)90187-5	10.1016/0165-0114(85)90090-9	195	Mathematics, Mathematics, Computer Science, Computer Science	Mathematics, Computer Science, Computer Science, Mathematics	Multi-criteria decision analysis with fuzzy pairwise comparisons	Fuzzy hierarchical analysis	de Graan J.G., Boender C.G.E., Lootsma F.A.	Buckley J.J., Buckley J.J., Buckley J.J.	1
86	10.1016/S0580-9517(08)70474-4		275	Immunology and Microbiology, Medicine	Medicine, Medicine	5 Analysis of the Chemical Composition and Primary Structure of Murein	Peptidoglycan types of bacterial cell walls and their taxonomic implications.	Schleifer K.H., Schleifer K.H.	Schleifer K.H., Kandler O.	1
87	10.1103/PhysRevA.8.401	10.1016/0550-3213(84)90287-6	315	Physics and Astronomy, Physics and Astronomy	Physics and Astronomy, Physics and Astronomy	Renormalization group equation for critical phenomena	Renormalization and effective lagrangians	Wegner F.J., Houghton A.	Polchinski J., Polchinski J.	0
88	10.1016/0370-2693(86)90347-3	10.1016/0370-2693(85)90112-1	125	Physics and Astronomy	Physics and Astronomy	Dimensional reduction caused by a cosmological constant	An exotic class of Kaluza-Klein models	Squires E.J.	Visser M.	1
89	10.1016/0550-3213(89)90122-3	10.1016/0550-3213(93)90506-K	166	Physics and Astronomy	Physics and Astronomy	Local and renormalizable action from the gribov horizon	Renormalizability of the critical limit of lattice gauge theory by BRS invariance	Zwanziger D.	Zwanziger D.	1
90	10.1016/0550-3213(74)90383-6	10.1103/PhysRevD.10.1823	105	Physics and Astronomy	Physics and Astronomy	Combining and splitting relativistic strings	Field theory of relativistic strings. II. Loops and Pomerons	Cremmer E., Gervais J.L., Cremmer E., Gervais J.L.	Kikkawa K., Kikkawa K., Kaku M., Kaku M.	1
91	10.1103/PhysRevD.19.3524	10.1103/PhysRevD.24.3312	165	Physics and Astronomy	Physics and Astronomy	New general relativity	Addendum to ""new general relativity""	Shirafuji T., Hayashi K., Shirafuji T., Hayashi K.	Hayashi K., Hayashi K., Shirafuji T., Shirafuji T.	1
92	10.1016/0370-2693(83)90152-1	10.1007/BF01452567	116	Physics and Astronomy	Physics and Astronomy	Low energy supergravity and the anomalous magnetic moment of the muon	Supersymmetric electro-weak effects on gμ-2	Kosower D.A., Krauss L.M., Sakai N., Kosower D.A., Krauss L.M., Sakai N., Kosower D.A., Krauss L.M., Sakai N., Kosower D.A., Krauss L.M., Sakai N.	Chamseddine A.H., Chamseddine A.H., Chamseddine A.H., Yuan T.-C., Yuan T.-C., Yuan T.-C., Arnowitt R., Arnowitt R., Arnowitt R., Nath P., Nath P., Nath P.	1
93	10.1016/0022-247X(83)90169-5	10.1016/0165-0114(87)90029-7	341	Mathematics, Mathematics, Mathematics, Mathematics	Mathematics, Computer Science, Mathematics, Computer Science	Differentials of fuzzy functions	Fuzzy differential equations	Ralescu D.A., Puri M.L.	Kaleva O., Kaleva O.	1
94	10.1016/0022-247X(83)90169-5	10.1016/0165-0114(87)90030-3	204	Mathematics, Mathematics, Mathematics, Mathematics, Mathematics, Mathematics, Mathematics, Mathematics, Mathematics, Mathematics, Mathematics, Mathematics, Mathematics, Mathematics	Computer Science, Mathematics, Engineering, Computer Science, Computer Science, Computer Science, Decision Sciences, Decision Sciences, Mathematics, Engineering, Decision Sciences, Decision Sciences, Computer Science, Computer Science	Differentials of fuzzy functions	On the fuzzy initial value problem	Ralescu D.A., Puri M.L.	Seikkala S., Seikkala S.	1
95	10.1016/0022-247X(83)90169-5	10.1016/0165-0114(86)90026-6	184	Mathematics, Mathematics, Mathematics, Mathematics, Mathematics, Mathematics, Mathematics, Mathematics, Mathematics, Mathematics, Mathematics, Mathematics, Mathematics, Mathematics	Mathematics, Engineering, Decision Sciences, Decision Sciences, Computer Science, Computer Science, Computer Science, Mathematics, Engineering, Decision Sciences, Decision Sciences, Computer Science, Computer Science, Computer Science	Differentials of fuzzy functions	Elementary fuzzy calculus	Ralescu D.A., Puri M.L., Ralescu D.A., Puri M.L.	Voxman W., Voxman W., Goetschel Jr. R., Goetschel Jr. R.	0
96	10.1016/0012-821X(78)90021-3	10.1016/0012-821X(80)90125-9	205	Earth and Planetary Sciences, Earth and Planetary Sciences, Earth and Planetary Sciences, Earth and Planetary Sciences, Earth and Planetary Sciences, Earth and Planetary Sciences, Earth and Planetary Sciences, Earth and Planetary Sciences, Earth and Planetary Sciences, Earth and Planetary Sciences, Earth and Planetary Sciences, Earth and Planetary Sciences, Earth and Planetary Sciences, Earth and…	Earth and Planetary Sciences, Earth and Planetary Sciences, Earth and Planetary Sciences, Earth and Planetary Sciences, Earth and Planetary Sciences, Earth and Planetary Sciences, Earth and Planetary Sciences, Earth and Planetary Sciences, Earth and Planetary Sciences, Earth and Planetary Sciences, Earth and Planetary Sciences, Earth and Planetary Sciences, Earth and Planetary Sciences, Earth and…	Lunar initial 143Nd/144Nd: Differential evolution of the lunar crust and mantle	Sm-Nd isotopic evolution of chondrites	Marti K., Lugmair G.W., Marti K., Lugmair G.W.	Jacobsen S.B., Jacobsen S.B., Wasserburg G.J., Wasserburg G.J.	0
97	10.1016/0012-821X(78)90021-3	10.1016/0012-821X(77)90060-7	375	Earth and Planetary Sciences, Earth and Planetary Sciences, Earth and Planetary Sciences, Earth and Planetary Sciences, Earth and Planetary Sciences, Earth and Planetary Sciences, Earth and Planetary Sciences, Earth and Planetary Sciences, Earth and Planetary Sciences, Earth and Planetary Sciences, Earth and Planetary Sciences, Earth and Planetary Sciences, Earth and Planetary Sciences, Earth and…	Earth and Planetary Sciences, Earth and Planetary Sciences, Earth and Planetary Sciences, Earth and Planetary Sciences, Earth and Planetary Sciences, Earth and Planetary Sciences, Earth and Planetary Sciences, Earth and Planetary Sciences, Earth and Planetary Sciences, Earth and Planetary Sciences, Earth and Planetary Sciences, Earth and Planetary Sciences, Earth and Planetary Sciences, Earth and…	Lunar initial 143Nd/144Nd: Differential evolution of the lunar crust and mantle	Subcommission on geochronology: Convention on the use of decay constants in geo- and cosmochronology	Marti K., Lugmair G.W., Marti K., Lugmair G.W.	Steiger R.H., Steiger R.H., Jager E., Jager E.	0
98	10.1016/0165-0114(88)90064-4		264	Computer Science, Computer Science, Computer Science, Computer Science, Computer Science, Computer Science, Mathematics, Mathematics, Mathematics, Mathematics, Mathematics, Mathematics	Computer Science, Computer Science, Computer Science, Engineering, Engineering, Mathematics, Computer Science, Computer Science, Computer Science, Engineering, Engineering, Mathematics	Fixed points in fuzzy metric spaces	FUZZY METRICS AND STATISTICAL METRIC SPACES.	Grabiec M., Grabiec M.	Kramosil Ivan, Michalek Jiri	1
99	10.1080/0022250X.1972.9989806	10.1016/0378-8733(78)90021-7	511	Social Sciences, Social Sciences, Social Sciences, Social Sciences, Social Sciences, Mathematics, Social Sciences, Social Sciences, Mathematics, Mathematics, Mathematics, Social Sciences	Social Sciences, Psychology, Social Sciences, Social Sciences, Social Sciences, Psychology, Social Sciences, Psychology, Social Sciences, Social Sciences, Social Sciences, Social Sciences	Factoring and weighting approaches to status scores and clique identification	Centrality in social networks conceptual clarification	Bonacich P.	Freeman L.C.	0
100	10.1016/0165-0114(89)90205-4	10.1016/S0165-0114(86)80034-3	1253	Computer Science, Computer Science, Computer Science, Computer Science, Computer Science, Computer Science, Computer Science, Computer Science, Computer Science, Computer Science, Computer Science, Computer Science, Computer Science, Computer Science, Computer Science, Computer Science, Computer Science, Computer Science, Computer Science, Computer Science, Computer Science, Decision Sciences, De…	Decision Sciences, Engineering, Decision Sciences, Computer Science, Computer Science, Computer Science, Decision Sciences, Decision Sciences, Engineering, Mathematics, Computer Science, Computer Science, Computer Science, Decision Sciences, Mathematics, Computer Science, Computer Science, Computer Science, Decision Sciences, Engineering, Mathematics, Computer Science, Computer Science, Computer …	Interval valued intuitionistic fuzzy sets	Intuitionistic fuzzy sets	Gargov G., Atanassov K.	Atanassov K.T., Atanassov K.T.	1
101	10.1016/0165-0114(89)90205-4	10.1016/0165-0114(89)90215-7	213	Mathematics, Decision Sciences, Decision Sciences, Computer Science, Computer Science, Computer Science, Computer Science, Computer Science, Computer Science, Computer Science, Computer Science, Computer Science, Decision Sciences, Mathematics, Mathematics, Mathematics, Computer Science, Computer Science, Computer Science, Computer Science, Computer Science, Computer Science, Mathematics, Decisio…	Computer Science, Decision Sciences, Decision Sciences, Computer Science, Computer Science, Mathematics, Engineering, Decision Sciences, Decision Sciences, Computer Science, Computer Science, Computer Science, Engineering, Engineering, Decision Sciences, Decision Sciences, Mathematics, Computer Science, Computer Science, Computer Science, Decision Sciences, Decision Sciences, Computer Science, Co…	Interval valued intuitionistic fuzzy sets	More on intuitionistic fuzzy sets	Gargov G., Atanassov K.	Atanassov K.T., Atanassov K.T.	0
102	10.1007/BF01449041	10.1016/0022-0396(84)90105-0	227	Mathematics, Mathematics	Mathematics, Mathematics	A Strong Maximum Principle for some quasilinear elliptic equations	Regularity for a more general class of quasilinear elliptic equations	Vazquez J.L.	Tolksdorf P.	1
103	10.1016/0031-9201(77)90108-X	10.1111/j.1365-246X.1980.tb02601.x	526	Earth and Planetary Sciences, Earth and Planetary Sciences, Earth and Planetary Sciences, Physics and Astronomy, Physics and Astronomy, Physics and Astronomy, Physics and Astronomy, Earth and Planetary Sciences, Physics and Astronomy, Physics and Astronomy, Earth and Planetary Sciences, Physics and Astronomy, Physics and Astronomy, Earth and Planetary Sciences, Earth and Planetary Sciences, Earth…	Earth and Planetary Sciences, Earth and Planetary Sciences, Environmental Science, Earth and Planetary Sciences, Earth and Planetary Sciences, Earth and Planetary Sciences, Environmental Science, Environmental Science, Earth and Planetary Sciences, Earth and Planetary Sciences, Earth and Planetary Sciences, Earth and Planetary Sciences, Environmental Science, Earth and Planetary Sciences, Earth a…	Hysteresis properties of titanomagnetites: Grain-size and compositional dependence	The least‐squares line and plane and the analysis of palaeomagnetic data	Day R., Fuller M., Schmidt V.A.	Kirschvink J.L., Kirschvink J.L., Kirschvink J.L.	0
104	10.1037/0022-3514.37.11.2098	10.1126/science.185.4157.1124	177	Social Sciences, Psychology	General, General	Biased assimilation and attitude polarization: The effects of prior theories on subsequently considered evidence	Judgment under uncertainty: Heuristics and biases	Ross L., Lepper M.R., Lord C.G., Ross L., Lepper M.R., Lord C.G.	Tversky A., Tversky A., Tversky A., Kahneman D., Kahneman D., Kahneman D.	0
105	10.1016/0021-9991(70)90037-9	10.1016/0010-4655(85)90117-1	103	Computer Science, Physics and Astronomy, Physics and Astronomy, Computer Science	Computer Science, Physics and Astronomy, Computer Science, Physics and Astronomy	The numerical solution of coupled differential equations arising from the Schrödinger equation	A variable step method for the numerical integration of the one-dimensional Schrödinger equation	Allison A.C., Allison A.C.	Raptis A.D., Cash J.R.	1
106	10.1016/0021-9991(70)90037-9	10.1016/0010-4655(78)90047-4	106	Physics and Astronomy, Physics and Astronomy, Computer Science, Computer Science	Computer Science, Physics and Astronomy, Physics and Astronomy, Computer Science	The numerical solution of coupled differential equations arising from the Schrödinger equation	Exponential-fitting methods for the numerical solution of the schrodinger equation	Allison A.C., Allison A.C.	Raptis A., Allison A.C.	1
107	10.1016/0021-9991(70)90037-9	10.1093/imamat/18.2.189	101	Computer Science, Physics and Astronomy, Physics and Astronomy, Physics and Astronomy, Computer Science, Computer Science, Computer Science, Computer Science, Computer Science, Computer Science, Physics and Astronomy, Physics and Astronomy, Physics and Astronomy, Physics and Astronomy	Biochemistry, Genetics and Molecular Biology, Mathematics, Environmental Science, Biochemistry, Genetics and Molecular Biology, Social Sciences, Social Sciences, Mathematics, Mathematics, Mathematics, Environmental Science, Social Sciences, Social Sciences, Mathematics, Mathematics	The numerical solution of coupled differential equations arising from the Schrödinger equation	Symmetric multistip methods for periodic initial value problems	Allison A.C., Allison A.C.	Watson I.A., Lambert J.D.	0
108	10.1080/01483918208067640	10.1099/00221287-100-2-221	181	Biochemistry, Genetics and Molecular Biology	Immunology and Microbiology	Separation of bacterial menaquinones by hplc using reverse phase (rp18) and a silver loaded ion exchanger as stationary phases	Distribution of menaquinones in actinomycetes and corynebacteria	Kroppenstedt R.M., Kroppenstedt R.M., Kroppenstedt R.M., Kroppenstedt R.M.	Collins M.D., Minnikin D.E., Goodfellow M., Pirouz T.	0
109	10.1080/01483918208067640	10.1016/0167-7012(84)90018-6	330	Biochemistry, Genetics and Molecular Biology, Biochemistry, Genetics and Molecular Biology, Biochemistry, Genetics and Molecular Biology	Immunology and Microbiology, Medicine, Biochemistry, Genetics and Molecular Biology	Separation of bacterial menaquinones by hplc using reverse phase (rp18) and a silver loaded ion exchanger as stationary phases	An integrated procedure for the extraction of bacterial isoprenoid quinones and polar lipids	Kroppenstedt R.M., Kroppenstedt R.M., Kroppenstedt R.M., Kroppenstedt R.M., Kroppenstedt R.M., Kroppenstedt R.M., Kroppenstedt R.M.	Minnikin D.E., O'Donnell A.G., Goodfellow M., Alderson G., Athalye M., Schaal A., Parlett J.H.	1
110	10.1016/0020-7225(72)90050-X	10.1063/1.332803	273	Engineering	Physics and Astronomy	Linear theory of nonlocal elasticity and dispersion of plane waves	On differential equations of nonlocal elasticity and solutions of screw dislocation and surface waves	Eringen A.C.	Eringen A.C.	1
111	10.1016/0370-2693(84)91178-X	10.1016/0370-2693(84)90341-1	210	Physics and Astronomy	Physics and Astronomy	Composite Higgs scalars	Composite Higgs and custodial SU(2)	Kaplan D.B., Georgi H., Dimopoulos S., Kaplan D.B., Georgi H., Dimopoulos S.	Kaplan D.B., Kaplan D.B., Kaplan D.B., Georgi H., Georgi H., Georgi H.	1
112	10.1016/0370-2693(76)90319-1	10.1016/0550-3213(74)90355-1	140	Physics and Astronomy	Physics and Astronomy	Supersymmetry and weak, electromagnetic and strong interactions	Supergauge transformations in four dimensions	Fayet P., Fayet P.	Zumino B., Wess J.	0
113	10.1016/0370-2693(76)90319-1	10.1016/0550-3213(81)90522-8	156	Physics and Astronomy	Physics and Astronomy	Supersymmetry and weak, electromagnetic and strong interactions	Softly broken supersymmetry and SU(5)	Fayet P., Fayet P.	Georgi H., Dimopoulos S.	0
114	10.1016/0370-2693(76)90319-1	10.1016/0370-2693(78)90858-4	164	Physics and Astronomy	Physics and Astronomy	Supersymmetry and weak, electromagnetic and strong interactions	Phenomenology of the production, decay, and detection of new hadronic states associated with supersymmetry	Fayet P., Fayet P.	Farrar G.R., Fayet P.	1
115	10.1103/PhysRevD.21.2171	10.1103/PhysRevD.28.2414	159	Physics and Astronomy, Physics and Astronomy, Physics and Astronomy, Physics and Astronomy	Physics and Astronomy, Physics and Astronomy, Physics and Astronomy, Physics and Astronomy	Thickening the string. I. The string perfect dust	String cosmologies	Stachel J.	Letelier P.S.	1
116	10.1016/0550-3213(81)90354-0	10.1103/PhysRevD.10.275	212	Physics and Astronomy	Physics and Astronomy	Proton lifetime and fermion masses in an SO(10) model	Lepton number as the fourth ""color""	Lazarides G., Wetterich C., Shafi Q., Lazarides G., Wetterich C., Shafi Q.	Pati J.C., Pati J.C., Pati J.C., Salam A., Salam A., Salam A.	1
117	10.1063/1.527815	10.1063/1.527421	116	Physics and Astronomy, Mathematics, Physics and Astronomy, Mathematics	Physics and Astronomy, Physics and Astronomy, Mathematics, Mathematics	A search for bilinear equations passing Hirota's three-soliton condition. I. KdV-type bilinear equations	A search for bilinear equations passing Hirota's three-soliton condition. II. mKdV-type bilinear equations	Hietarinta J.	Hietarinta J.	0
118	10.1016/0370-2693(89)91598-0	10.1016/0370-2693(82)90622-0	120	Physics and Astronomy	Physics and Astronomy	Antineutrino spectra from 241Pu and 239Pu thermal neutron fission products	Experimental beta-spectra from 239Pu and 235U thermal neutron fission products and their correlated antineutrino spectra	Hahn A.A., Colvin G., Schreckenbach K., Krusche B., Gelletly W., von Feilitzsch F., Hahn A.A., Colvin G., Schreckenbach K., Krusche B., Gelletly W., von Feilitzsch F., Hahn A.A., Colvin G., Schreckenbach K., Krusche B., Gelletly W., von Feilitzsch F.	Hahn A.A., Hahn A.A., Hahn A.A., Hahn A.A., Hahn A.A., Hahn A.A., Schreckenbach K., Schreckenbach K., Schreckenbach K., Schreckenbach K., Schreckenbach K., Schreckenbach K., von Feilitzsch F., von Feilitzsch F., von Feilitzsch F., von Feilitzsch F., von Feilitzsch F., von Feilitzsch F.	1
119	10.1103/PhysRevA.31.1695	10.1063/1.445869	1595	Physics and Astronomy, Physics and Astronomy, Physics and Astronomy, Physics and Astronomy	Chemistry, Physics and Astronomy, Chemistry, Physics and Astronomy	Canonical dynamics: Equilibrium phase-space distributions	Comparison of simple potential functions for simulating liquid water	Hoover W.G., Hoover W.G., Hoover W.G., Hoover W.G., Hoover W.G.	Klein M.L., Impey R.W., Madura J.D., Chandrasekhar J., Jorgensen W.L.	0
120	10.1103/PhysRevA.31.1695	10.1016/0021-9991(77)90121-8	279	Physics and Astronomy, Physics and Astronomy, Physics and Astronomy, Physics and Astronomy	Computer Science, Physics and Astronomy, Physics and Astronomy, Computer Science	Canonical dynamics: Equilibrium phase-space distributions	Nonphysical sampling distributions in Monte Carlo free-energy estimation: Umbrella sampling	Hoover W.G., Hoover W.G.	Torrie G.M., Valleau J.P.	0
121	10.1103/PhysRevA.31.1695	10.1021/j100308a038	840	Physics and Astronomy, Physics and Astronomy, Physics and Astronomy, Physics and Astronomy	Engineering, Chemistry, Engineering, Chemistry	Canonical dynamics: Equilibrium phase-space distributions	The missing term in effective pair potentials	Hoover W.G., Hoover W.G., Hoover W.G.	Berendsen H.J.C., Grigera J.R., Straatsma T.P.	0
122	10.1103/PhysRevA.31.1695	10.1103/PhysRevB.31.5262	194	Physics and Astronomy, Physics and Astronomy	Physics and Astronomy, Physics and Astronomy	Canonical dynamics: Equilibrium phase-space distributions	Computer simulation of local order in condensed phases of silicon	Hoover W.G., Hoover W.G.	Stillinger F.H., Weber T.A.	0
123	10.1103/PhysRevA.31.1695	10.1103/PhysRevB.29.6443	315	Physics and Astronomy, Physics and Astronomy, Physics and Astronomy, Physics and Astronomy	Materials Science, Materials Science, Physics and Astronomy, Physics and Astronomy	Canonical dynamics: Equilibrium phase-space distributions	Embedded-atom method: Derivation and application to impurities, surfaces, and other defects in metals	Hoover W.G., Hoover W.G.	Daw M.S., Baskes M.I.	0
124	10.1103/PhysRevA.31.1695	10.1016/0021-9991(76)90078-4	120	Physics and Astronomy, Physics and Astronomy, Physics and Astronomy, Physics and Astronomy	Computer Science, Physics and Astronomy, Physics and Astronomy, Computer Science	Canonical dynamics: Equilibrium phase-space distributions	Efficient estimation of free energy differences from Monte Carlo data	Hoover W.G.	Bennett C.H.	0
125	10.1103/PhysRevA.31.1695	10.1103/PhysRevB.33.7983	161	Physics and Astronomy, Physics and Astronomy	Physics and Astronomy, Physics and Astronomy	Canonical dynamics: Equilibrium phase-space distributions	Embedded-atom-method functions for the fcc metals Cu, Ag, Au, Ni, Pd, Pt, and their alloys	Hoover W.G., Hoover W.G., Hoover W.G.	Baskes M.I., Daw M.S., Foiles S.M.	0
126	10.1103/PhysRevA.31.1695	10.1103/PhysRevB.39.5566	200	Physics and Astronomy, Physics and Astronomy	Physics and Astronomy, Physics and Astronomy	Canonical dynamics: Equilibrium phase-space distributions	Modeling solid-state chemistry: Interatomic potentials for multicomponent systems	Hoover W.G.	Tersoff J.	0
127	10.1103/PhysRevA.31.1695	10.1002/jcc.540040211	558	Physics and Astronomy, Physics and Astronomy, Physics and Astronomy, Physics and Astronomy	Mathematics, Chemistry, Mathematics, Chemistry	Canonical dynamics: Equilibrium phase-space distributions	CHARMM: A program for macromolecular energy, minimization, and dynamics calculations	Hoover W.G., Hoover W.G., Hoover W.G., Hoover W.G., Hoover W.G., Hoover W.G.	Brooks B.R., Bruccoleri R.E., Olafson B.D., States D.J., Swaminathan S., Karplus M.	0
128	10.1007/BF00549096	10.1103/PhysRevB.37.785	473	Chemistry	Physics and Astronomy	Bonded-atom fragments for describing molecular charge densities	Development of the Colle-Salvetti correlation-energy formula into a functional of the electron density	Hirshfeld F.L., Hirshfeld F.L., Hirshfeld F.L.	Yang W., Lee C., Parr R.G.	0
129	10.1007/BF00549096	10.1063/1.449486	244	Chemistry, Chemistry	Physics and Astronomy, Chemistry	Bonded-atom fragments for describing molecular charge densities	Natural population analysis	Hirshfeld F.L., Hirshfeld F.L., Hirshfeld F.L.	Weinhold F., Weinstock R.B., Reed A.E.	0
130	10.1007/BF00549096	10.1080/00268977000101561	126	Chemistry, Chemistry, Chemistry, Chemistry	Biochemistry, Genetics and Molecular Biology, Biochemistry, Genetics and Molecular Biology, Chemistry, Physics and Astronomy	Bonded-atom fragments for describing molecular charge densities	The calculation of small molecular interactions by the differences of separate total energies. Some procedures with reduced errors	Hirshfeld F.L., Hirshfeld F.L.	Boys S.F., Bernardi F.	0
131	10.1016/0022-247X(71)90110-7	10.1016/0021-9991(72)90089-7	389	Mathematics, Mathematics, Mathematics, Mathematics	Computer Science, Computer Science, Physics and Astronomy, Physics and Astronomy	Differential quadrature and long-term integration	Differential quadrature: A technique for the rapid solution of nonlinear partial differential equations	Casti J., Bellman R., Casti J., Bellman R., Casti J., Bellman R.	Casti J., Casti J., Kashef B.G., Kashef B.G., Bellman R., Bellman R.	0
132	10.1103/PhysRevA.2.1075	10.1103/PhysRevA.3.786	220	Physics and Astronomy, Physics and Astronomy	Physics and Astronomy, Physics and Astronomy	Statistical mechanics of the XY model. I	Statistical mechanics of the X y model. II. Spin-correlation functions	Dresden M., McCoy B.M., Barouch E., Dresden M., McCoy B.M., Barouch E.	Barouch E., Barouch E., Barouch E., McCoy B.M., McCoy B.M., McCoy B.M.	1
133	10.1016/0370-2693(90)91454-J	10.1103/PhysRevD.48.2826	134	Physics and Astronomy	Physics and Astronomy	Duality symmetric formulation of string world sheet dynamics	Superspace duality in low-energy superstrings	Tseytlin A.A.	Siegel W.	0
134	10.1038/293133a0	10.1145/358669.358692	234	General, General, General, General, General, General	Computer Science, Computer Science, Computer Science, Mathematics, Computer Science, Computer Science	A computer algorithm for reconstructing a scene from two projections	Random sample consensus: A Paradigm for Model Fitting with Applications to Image Analysis and Automated Cartography	Longuet-higgins H.C., Longuet-higgins H.C.	Fischler M.A., Bolles R.C.	0
135	10.1080/00268978700101761	10.1126/science.235.4792.1038	151	Chemistry, Biochemistry, Genetics and Molecular Biology, Biochemistry, Genetics and Molecular Biology, Physics and Astronomy	General, General, General, General	Constant thermodynamic tension monte carlo studies of elastic properties of a two-dimensional system of hard cyclic hexamers	Foam structures with a negative poisson's ratio	Wojciechowski K.W.	Lakes R.	0
136	10.1016/0550-3213(87)90125-8	10.1016/0370-2693(85)90112-1	131	Physics and Astronomy	Physics and Astronomy	Spacetime as a membrane in higher dimensions	An exotic class of Kaluza-Klein models	Gibbons G.W., Wiltshire D.L.	Visser M., Visser M.	1
137	10.1007/BF01650949	10.1002/nme.1620240207	569	Engineering, Engineering, Engineering	Engineering, Mathematics, Mathematics	Optimal shape design as a material distribution problem	The method of moving asymptotes—a new method for structural optimization	Bendsoe M.P.	Svanberg K.	0
138	10.1016/0097-3165(72)90019-2		204	Mathematics, Mathematics	Mathematics, Mathematics	On the density of families of sets	A combinatorial problem; Stability and order for models and theories in infinitary languages	Sauer N.	Shelah S.	1
139	10.1016/0022-247X(79)90024-6	10.1007/BF02757276	141	Mathematics, Mathematics	Mathematics, Mathematics	Weak convergence theorems for nonexpansive mappings in Banach spaces	An example concerning fixed points	Reich S., Reich S.	Lindenstrauss J., Genel A.	0
140	10.1063/1.1665613	10.1063/1.1666069	147	Mathematics, Physics and Astronomy, Physics and Astronomy, Mathematics	Physics and Astronomy, Physics and Astronomy, Mathematics, Mathematics	The Einstein tensor and its generalizations	The four-dimensionality of space and the Einstein tensor	Lovelock D.	Lovelock D.	1
141	10.1016/S0010-8545(00)80009-0	10.1039/DT9840001349	358	Chemistry	Chemistry	The use of conductivity measurements in organic solvents for the characterisation of coordination compounds	Synthesis, structure, and spectroscopic properties of copper(II) compounds containing nitrogen-sulphur donor ligands; the crystal and molecular structure of aqua[1,7-bis(N-methylbenzimidazol-2′;-yl)-2,6-dithiaheptane]copper(II) perchlorate	Geary W.J., Geary W.J., Geary W.J., Geary W.J., Geary W.J.	Reedijk J., Verschoor G.C., Van Rijn J., Rao T.N., Addison A.W.	0
142	10.1007/BF00253395	10.1007/BF00045689	197	Engineering, Engineering, Engineering, Engineering, Mathematics, Mathematics, Engineering, Engineering, Engineering, Mathematics, Mathematics, Mathematics, Mathematics, Mathematics, Mathematics, Engineering	Engineering, Engineering, Engineering, Engineering, Engineering, Engineering, Engineering, Materials Science, Materials Science, Materials Science, Engineering, Engineering, Engineering, Materials Science, Engineering, Engineering	On the entropy production inequality	Thermoelasticity	Green A.E., Laws N., Green A.E., Laws N.	Lindsay K.A., Lindsay K.A., Green A.E., Green A.E.	0
143	10.1016/0370-2693(86)91126-3	10.1103/PhysRevD.22.2227	381	Physics and Astronomy	Physics and Astronomy	Barygenesis without grand unification	Neutrino masses in SU(2) U(1) theories	Fukugita M., Yanagida T., Fukugita M., Yanagida T.	Valle J.W.F., Valle J.W.F., Schechter J., Schechter J.	0
144	10.1016/0370-2693(86)91126-3	10.1016/0370-2693(84)90334-4	241	Physics and Astronomy	Physics and Astronomy	Barygenesis without grand unification	Cosmological gravitino regeneration and decay	Fukugita M., Yanagida T., Fukugita M., Yanagida T., Fukugita M., Yanagida T.	Kim J.E., Kim J.E., Ellis J., Ellis J., Nanopoulos D.V., Nanopoulos D.V.	0
145	10.1016/0370-2693(86)91126-3	10.1016/0370-2693(84)91656-3	249	Physics and Astronomy	Physics and Astronomy	Barygenesis without grand unification	Is it easy to save the gravitino?	Fukugita M., Yanagida T., Fukugita M., Yanagida T.	Linde A.D., Linde A.D., Khlopov M.Yu., Khlopov M.Yu.	0
146	10.1016/0370-2693(86)91126-3	10.1103/PhysRevD.23.165	290	Physics and Astronomy, Physics and Astronomy	Physics and Astronomy, Physics and Astronomy	Barygenesis without grand unification	Neutrino masses and mixings in gauge models with spontaneous parity violation	Fukugita M., Yanagida T., Fukugita M., Yanagida T.	Senjanovic G., Senjanovic G., Mohapatra R.N., Mohapatra R.N.	0
147	10.1016/0370-2693(86)91126-3	10.1103/PhysRevLett.57.961	124	Physics and Astronomy	Physics and Astronomy	Barygenesis without grand unification	Large muon- and electron-number nonconservation in supergravity theories	Fukugita M., Yanagida T., Fukugita M., Yanagida T.	Borzumati F., Borzumati F., Masiero A., Masiero A.	0
148	10.1037/0022-3514.49.1.95	10.1093/sf/63.4.967	214	Psychology, Social Sciences, Social Sciences, Social Sciences, Psychology, Psychology	Arts and Humanities, Arts and Humanities, Social Sciences, Social Sciences, Social Sciences, Social Sciences	Trust in Close Relationships	Trust as a social reality	Holmes J.G., Rempel J.K., Zanna M.P., Holmes J.G., Rempel J.K., Zanna M.P.	Weigert A., Weigert A., Weigert A., Lewis J.D., Lewis J.D., Lewis J.D.	0
149	10.1016/0550-3213(74)90355-1	10.1016/0550-3213(88)90171-X	105	Physics and Astronomy	Physics and Astronomy	Supergauge transformations in four dimensions	Upper bounds on supersymmetric particle masses	Zumino B., Wess J., Zumino B., Wess J.	Giudice G.F., Giudice G.F., Barbieri R., Barbieri R.	0
150	10.1007/BF00760427	10.1016/0370-2693(80)90670-X	160	Physics and Astronomy	Physics and Astronomy	Classical gravity with higher derivatives	A new type of isotropic cosmological models without singularity	Stelle K.S.	Starobinsky A.A.	0
151	10.1016/0898-1221(76)90003-1		403	Mathematics, Mathematics, Computer Science	Engineering, Engineering, Engineering	A dual algorithm for the solution of nonlinear variational problems via finite element approximation	Approximation by Finite Elements of Order One and Solution by Penalization-Duality of a Class of Nonlinear Dirichlet Problems.	Gabay D., Mercier B., Gabay D., Mercier B.	Marroco A., Marroco A., Glowinski R., Glowinski R.	0
152	10.1016/0898-1221(76)90003-1		151	Computer Science, Mathematics, Mathematics, Mathematics, Computer Science, Mathematics	Mathematics, Mathematics, Computer Science, Mathematics, Computer Science, Computer Science	A dual algorithm for the solution of nonlinear variational problems via finite element approximation	On the Douglas-Rachford splitting method and the proximal point algorithm for maximal monotone operators	Gabay D., Mercier B., Gabay D., Mercier B.	Bertsekas Dimitri P., Bertsekas Dimitri P., Eckstein Jonathan, Eckstein Jonathan	0
153	10.1016/0898-1221(76)90003-1	10.1016/S0168-2024(08)70034-1	167	Mathematics, Mathematics, Computer Science	Mathematics, Mathematics, Mathematics	A dual algorithm for the solution of nonlinear variational problems via finite element approximation	Chapter IX Applications of the Method of Multipliers to Variational Inequalities	Gabay D., Mercier B.	Gabay D., Gabay D.	0
154	10.1016/0370-2693(80)90670-X	10.1103/RevModPhys.61.1	207	Physics and Astronomy	Physics and Astronomy	A new type of isotropic cosmological models without singularity	The cosmological constant problem	Starobinsky A.A.	Weinberg S.	0
155	10.1016/0550-3213(70)90416-5		572	Physics and Astronomy	Physics and Astronomy	Massive and mass-less Yang-Mills and gravitational fields	LINEARIZED GRAVITATION THEORY AND THE GRAVITON MASS	van Dam H., Veltman M.	ZAKHAROV VI, ZAKHAROV VI	0
156	10.1016/0550-3213(70)90416-5	10.1016/0370-2693(72)90147-5	402	Physics and Astronomy	Physics and Astronomy	Massive and mass-less Yang-Mills and gravitational fields	To the problem of nonvanishing gravitation mass	van Dam H., Veltman M.	Vainshtein A.I., Vainshtein A.I.	1
157	10.1016/0021-9991(75)90060-1	10.1016/0021-9991(76)90041-3	266	Computer Science, Physics and Astronomy, Physics and Astronomy, Computer Science	Computer Science, Physics and Astronomy, Computer Science, Physics and Astronomy	A new algorithm for Monte Carlo simulation of Ising spin systems	A general method for numerically simulating the stochastic time evolution of coupled chemical reactions	Kalos M.H., Lebowitz J.L., Bortz A.B.	Gillespie D.T., Gillespie D.T., Gillespie D.T.	0
158	10.1038/235147a0	10.1139/e81-019	181	General	Earth and Planetary Sciences	Iranian geology and continental drift in the Middle East	TOWARDS A PALEOGEOGRAPHY AND TECTONIC EVOLUTION OF IRAN.	Takin M., Takin M.	Berberian Manuel, King G.C.P.	0
159	10.1016/0370-2693(85)90112-1	10.1016/0370-2693(83)91254-6	197	Physics and Astronomy	Physics and Astronomy	An exotic class of Kaluza-Klein models	Extra space-time dimensions: Towards a solution to the cosmological constant problem	Visser M., Visser M.	Shaposhnikov M.E., Rubakov V.A.	0
160	10.1016/0370-2693(85)90112-1	10.1016/0370-2693(83)91253-4	379	Physics and Astronomy	Physics and Astronomy	An exotic class of Kaluza-Klein models	Do we live inside a domain wall?	Visser M., Visser M.	Shaposhnikov M.E., Rubakov V.A.	1
161	10.1016/0370-2693(80)90825-4	10.1103/PhysRevD.22.2227	490	Physics and Astronomy	Physics and Astronomy	Neutrino mass problem and gauge hierarchy	Neutrino masses in SU(2) U(1) theories	Magg M., Wetterich Ch., Magg M., Wetterich Ch.	Valle J.W.F., Valle J.W.F., Schechter J., Schechter J.	0
162	10.1016/0370-2693(80)90825-4	10.1103/PhysRevLett.44.912	437	Physics and Astronomy	Physics and Astronomy	Neutrino mass problem and gauge hierarchy	Neutrino mass and spontaneous parity nonconservation	Magg M., Wetterich Ch., Magg M., Wetterich Ch.	Senjanovic G., Senjanovic G., Mohapatra R.N., Mohapatra R.N.	0
163	10.1016/0370-2693(80)90825-4	10.1103/PhysRevD.23.165	504	Physics and Astronomy, Physics and Astronomy	Physics and Astronomy, Physics and Astronomy	Neutrino mass problem and gauge hierarchy	Neutrino masses and mixings in gauge models with spontaneous parity violation	Magg M., Wetterich Ch., Magg M., Wetterich Ch.	Senjanovic G., Senjanovic G., Mohapatra R.N., Mohapatra R.N.	0
164	10.1016/0550-3213(86)90475-X	10.1016/0370-2693(80)90349-4	194	Physics and Astronomy	Physics and Astronomy	Quantum numbers of Majorana neutrino masses	A theory of lepton number violation and neutrino Majorana masses	Zee A.	Zee A.	1
165	10.1016/0010-4655(78)90047-4	10.1016/0010-4655(80)90062-4	209	Physics and Astronomy, Physics and Astronomy, Computer Science, Computer Science	Computer Science, Physics and Astronomy, Physics and Astronomy, Computer Science	Exponential-fitting methods for the numerical solution of the schrodinger equation	A numerov-like scheme for the numerical solution of the Schrödinger equation in the deep continuum spectrum of energies	Allison A.C., Raptis A., Allison A.C., Raptis A.	Ixaru L.Gr., Ixaru L.Gr., Rizea M., Rizea M.	1
166	10.1016/0010-4655(78)90047-4	10.1016/0377-0427(86)90224-4	118	Computer Science, Physics and Astronomy, Computer Science, Physics and Astronomy	Mathematics, Mathematics, Mathematics, Mathematics	Exponential-fitting methods for the numerical solution of the schrodinger equation	A Noumerov-type method with minimal phase-lag for the integration of second order periodic initial-value problems. II: explicit method	Allison A.C., Raptis A., Allison A.C., Raptis A.	Rao P.S., Rao P.S., Chawla M.M., Chawla M.M.	0
167	10.1016/0010-4655(78)90047-4	10.1016/0010-4655(85)90100-6	116	Physics and Astronomy, Computer Science, Computer Science, Physics and Astronomy	Physics and Astronomy, Computer Science, Physics and Astronomy, Computer Science	Exponential-fitting methods for the numerical solution of the schrodinger equation	Comparison of some four-step methods for the numerical solution of the Schrödinger equation	Allison A.C., Raptis A., Allison A.C., Raptis A.	Ixaru L.Gr., Ixaru L.Gr., Rizea M., Rizea M.	1
168	10.1016/0010-4655(78)90047-4	10.1093/imamat/18.2.189	172	Physics and Astronomy, Physics and Astronomy, Computer Science, Physics and Astronomy, Physics and Astronomy, Physics and Astronomy, Physics and Astronomy, Computer Science, Computer Science, Computer Science, Computer Science, Physics and Astronomy, Computer Science, Computer Science	Mathematics, Mathematics, Mathematics, Mathematics, Environmental Science, Biochemistry, Genetics and Molecular Biology, Social Sciences, Social Sciences, Social Sciences, Biochemistry, Genetics and Molecular Biology, Environmental Science, Social Sciences, Mathematics, Mathematics	Exponential-fitting methods for the numerical solution of the schrodinger equation	Symmetric multistip methods for periodic initial value problems	Allison A.C., Raptis A., Allison A.C., Raptis A.	Lambert J.D., Lambert J.D., Watson I.A., Watson I.A.	0
169	10.1007/BF02192660	10.1007/BF02924890	347	Mathematics, Mathematics, Mathematics, Mathematics, Mathematics, Mathematics	Mathematics, Mathematics, Physics and Astronomy, Mathematics, Physics and Astronomy, Physics and Astronomy	Remarks on the stability of functional equations		Cholewa P.W.	Skof F.	0
170	10.1007/BF02192660	10.1090/S0002-9939-1978-0507327-1	399	Mathematics, Mathematics, Mathematics, Mathematics, Mathematics, Mathematics	Mathematics, Mathematics, Mathematics, Mathematics, Mathematics, Mathematics	Remarks on the stability of functional equations	On the stability of the linear mapping in banach spaces	Cholewa P.W.	Rassias T.M.	0
171	10.1016/0010-0285(75)90005-5	10.3758/BF03197692	102	Social Sciences, Social Sciences, Psychology, Social Sciences, Psychology, Psychology, Psychology, Psychology, Psychology, Computer Science, Computer Science, Computer Science, Psychology, Psychology, Psychology	Psychology, Psychology, Arts and Humanities, Arts and Humanities, Psychology, Psychology, Arts and Humanities, Psychology, Psychology, Arts and Humanities, Psychology, Psychology, Arts and Humanities, Psychology, Psychology	The perceptual span and peripheral cues in reading	Lexical complexity and fixation times in reading: Effects of word frequency, verb complexity, and lexical ambiguity	Rayner K., Rayner K.	Duffy S.A., Rayner K.	1
172	10.1016/0020-7373(92)90069-W	10.1007/BF01001956	256	Engineering	Engineering	A decision theoretic framework for approximating concepts	Rough sets	Wong S.K.M., Yao Y.Y.	Pawlak Z., Pawlak Z.	1
173	10.1007/BF01206178	10.1007/BF01205792	162	Physics and Astronomy, Mathematics, Mathematics, Mathematics, Physics and Astronomy, Physics and Astronomy, Physics and Astronomy, Physics and Astronomy, Physics and Astronomy	Physics and Astronomy, Mathematics, Physics and Astronomy, Physics and Astronomy, Mathematics, Physics and Astronomy, Physics and Astronomy, Mathematics, Physics and Astronomy	On-shell improved lattice gauge theories	On-shell improved lattice gauge theories	Weisz P., Luscher M., Weisz P., Luscher M.	Luscher M., Luscher M., Weisz P., Weisz P.	0
174	10.1016/0010-4655(80)90062-4	10.1016/0377-0427(86)90224-4	121	Physics and Astronomy, Computer Science, Computer Science, Physics and Astronomy	Mathematics, Mathematics, Mathematics, Mathematics	A numerov-like scheme for the numerical solution of the Schrödinger equation in the deep continuum spectrum of energies	A Noumerov-type method with minimal phase-lag for the integration of second order periodic initial-value problems. II: explicit method	Ixaru L.Gr., Rizea M., Ixaru L.Gr., Rizea M.	Chawla M.M., Chawla M.M., Rao P.S., Rao P.S.	0
175	10.1016/0010-4655(80)90062-4	10.1016/0010-4655(85)90100-6	132	Computer Science, Computer Science, Physics and Astronomy, Physics and Astronomy	Computer Science, Physics and Astronomy, Physics and Astronomy, Computer Science	A numerov-like scheme for the numerical solution of the Schrödinger equation in the deep continuum spectrum of energies	Comparison of some four-step methods for the numerical solution of the Schrödinger equation	Ixaru L.Gr., Rizea M., Ixaru L.Gr., Rizea M.	Rizea M., Rizea M., Ixaru L.Gr., Ixaru L.Gr.	1
176	10.1016/0010-4655(80)90062-4	10.1007/BF01395931	123	Physics and Astronomy, Physics and Astronomy, Computer Science, Computer Science	Mathematics, Mathematics, Mathematics, Mathematics	A numerov-like scheme for the numerical solution of the Schrödinger equation in the deep continuum spectrum of energies	Chebyshevian multistep methods for ordinary differential equations	Ixaru L.Gr., Rizea M.	Lyche T., Lyche T.	1
177	10.1016/0010-4655(80)90062-4	10.1093/imamat/18.2.189	186	Physics and Astronomy, Computer Science, Computer Science, Computer Science, Physics and Astronomy, Physics and Astronomy, Physics and Astronomy, Computer Science, Computer Science, Computer Science, Computer Science, Physics and Astronomy, Physics and Astronomy, Physics and Astronomy	Mathematics, Environmental Science, Mathematics, Mathematics, Mathematics, Environmental Science, Biochemistry, Genetics and Molecular Biology, Mathematics, Social Sciences, Biochemistry, Genetics and Molecular Biology, Social Sciences, Social Sciences, Social Sciences, Mathematics	A numerov-like scheme for the numerical solution of the Schrödinger equation in the deep continuum spectrum of energies	Symmetric multistip methods for periodic initial value problems	Ixaru L.Gr., Rizea M., Ixaru L.Gr., Rizea M.	Watson I.A., Watson I.A., Lambert J.D., Lambert J.D.	0
178	10.1093/biomet/58.1.83	10.1080/01621459.1988.10478560	119	Mathematics, Mathematics, Decision Sciences, Decision Sciences, Agricultural and Biological Sciences, Mathematics, Mathematics, Agricultural and Biological Sciences, Agricultural and Biological Sciences, Agricultural and Biological Sciences, Mathematics, Mathematics	Decision Sciences, Decision Sciences, Mathematics, Decision Sciences, Mathematics, Decision Sciences, Mathematics, Decision Sciences, Decision Sciences, Mathematics, Mathematics, Mathematics	Spectra of some self-exciting and mutually exciting point processes	Statistical models for earthquake occurrences and residual analysis for point processes	Hawkes A.G.	Ogata Y.	0
179	10.1007/BF02291481	10.1037/0033-295X.85.2.59	193	Psychology, Mathematics, Mathematics, Psychology	Arts and Humanities, Psychology, Arts and Humanities, Psychology	A sequential theory of psychological discrimination	A theory of memory retrieval	Link S.W., Heath R.A.	Ratcliff R., Ratcliff R.	0
180	10.1021/ar50061a004	10.1021/ja00757a071	327	Chemistry, Chemistry, Chemistry, Chemistry	Biochemistry, Genetics and Molecular Biology, Chemistry, Chemical Engineering, Chemical Engineering	Reactive 1,4-Dehydroaromatics	p-Benzyne. Generation as an Intermediate in a Thermal Isomerization Reaction and Trapping Evidence for the 1,4-Benzenediyl Structure	Bergman R.G., Bergman R.G.	Bergman R.G., Jones R.R.	1
181	10.1007/BF00386001	10.1016/0003-2697(71)90370-8	213	Agricultural and Biological Sciences, Agricultural and Biological Sciences, Biochemistry, Genetics and Molecular Biology, Biochemistry, Genetics and Molecular Biology, Agricultural and Biological Sciences, Agricultural and Biological Sciences, Biochemistry, Genetics and Molecular Biology, Biochemistry, Genetics and Molecular Biology	Biochemistry, Genetics and Molecular Biology, Biochemistry, Genetics and Molecular Biology, Biochemistry, Genetics and Molecular Biology, Biochemistry, Genetics and Molecular Biology, Biochemistry, Genetics and Molecular Biology, Biochemistry, Genetics and Molecular Biology, Biochemistry, Genetics and Molecular Biology, Biochemistry, Genetics and Molecular Biology	The presence of glutathione and glutathione reductase in chloroplasts: A proposed role in ascorbic acid metabolism	Superoxide dismutase: Improved assays and an assay applicable to acrylamide gels	Foyer C.H., Halliwell B., Foyer C.H., Halliwell B.	Beauchamp C., Beauchamp C., Fridovich I., Fridovich I.	0
182	10.1007/BF00386001	10.1016/0003-2697(76)90527-3	594	Biochemistry, Genetics and Molecular Biology, Biochemistry, Genetics and Molecular Biology, Agricultural and Biological Sciences, Agricultural and Biological Sciences, Biochemistry, Genetics and Molecular Biology, Agricultural and Biological Sciences, Agricultural and Biological Sciences, Biochemistry, Genetics and Molecular Biology	Biochemistry, Genetics and Molecular Biology, Biochemistry, Genetics and Molecular Biology, Biochemistry, Genetics and Molecular Biology, Biochemistry, Genetics and Molecular Biology, Biochemistry, Genetics and Molecular Biology, Biochemistry, Genetics and Molecular Biology, Biochemistry, Genetics and Molecular Biology, Biochemistry, Genetics and Molecular Biology	The presence of glutathione and glutathione reductase in chloroplasts: A proposed role in ascorbic acid metabolism	A rapid and sensitive method for the quantitation of microgram quantities of protein utilizing the principle of protein-dye binding	Foyer C.H., Halliwell B.	Bradford M.M., Bradford M.M.	0
183	10.1007/BF00386001	10.1093/jxb/32.1.93	157	Agricultural and Biological Sciences, Biochemistry, Genetics and Molecular Biology, Biochemistry, Genetics and Molecular Biology, Biochemistry, Genetics and Molecular Biology, Biochemistry, Genetics and Molecular Biology, Biochemistry, Genetics and Molecular Biology, Agricultural and Biological Sciences, Agricultural and Biological Sciences, Agricultural and Biological Sciences, Agricultural and …	Environmental Science, Biochemistry, Genetics and Molecular Biology, Mathematics, Environmental Science, Agricultural and Biological Sciences, Agricultural and Biological Sciences, Agricultural and Biological Sciences, Agricultural and Biological Sciences, Biochemistry, Genetics and Molecular Biology, Decision Sciences, Decision Sciences, Mathematics	The presence of glutathione and glutathione reductase in chloroplasts: A proposed role in ascorbic acid metabolism	Leaf senescence: Correlated with increased levels of membrane permeability and lipid peroxidation, and decreased levels of superoxide dismutase and catalase	Foyer C.H., Halliwell B., Foyer C.H., Halliwell B., Foyer C.H., Halliwell B.	Dhindsa R.S., Dhindsa R.S., Plumb-dhindsa P., Plumb-dhindsa P., Thorpe T.A., Thorpe T.A.	0
184	10.1016/0048-7333(84)90018-0	10.1177/014920639101700108	166	Decision Sciences, Business, Management and Accounting, Decision Sciences, Business, Management and Accounting, Business, Management and Accounting, Business, Management and Accounting	Economics, Econometrics and Finance, Business, Management and Accounting, Business, Management and Accounting, Business, Management and Accounting, Economics, Econometrics and Finance, Economics, Econometrics and Finance	Sectoral patterns of technical change: Towards a taxonomy and a theory	Firm Resources and Sustained Competitive Advantage	Pavitt K.	Barney J.	0
185	10.1063/1.445869	10.1063/1.328693	1144	Chemistry, Physics and Astronomy	Physics and Astronomy, Physics and Astronomy	Comparison of simple potential functions for simulating liquid water	Polymorphic transitions in single crystals: A new molecular dynamics method	Madura J.D., Impey R.W., Chandrasekhar J., Jorgensen W.L., Klein M.L., Madura J.D., Impey R.W., Chandrasekhar J., Jorgensen W.L., Klein M.L.	Parrinello M., Parrinello M., Parrinello M., Parrinello M., Parrinello M., Rahman A., Rahman A., Rahman A., Rahman A., Rahman A.	0
186	10.1063/1.445869	10.1002/bip.360221211	653	Chemistry, Chemistry, Chemistry, Chemistry, Physics and Astronomy, Physics and Astronomy, Physics and Astronomy, Physics and Astronomy	Chemistry, Biochemistry, Genetics and Molecular Biology, Materials Science, Biochemistry, Genetics and Molecular Biology, Materials Science, Chemistry, Biochemistry, Genetics and Molecular Biology, Biochemistry, Genetics and Molecular Biology	Comparison of simple potential functions for simulating liquid water	Dictionary of protein secondary structure: Pattern recognition of hydrogen‐bonded and geometrical features	Madura J.D., Impey R.W., Chandrasekhar J., Jorgensen W.L., Klein M.L., Madura J.D., Impey R.W., Chandrasekhar J., Jorgensen W.L., Klein M.L.	Kabsch W., Kabsch W., Kabsch W., Kabsch W., Kabsch W., Sander C., Sander C., Sander C., Sander C., Sander C.	0
187	10.1063/1.445869	10.1016/0021-9991(76)90078-4	322	Chemistry, Physics and Astronomy, Physics and Astronomy, Chemistry	Physics and Astronomy, Physics and Astronomy, Computer Science, Computer Science	Comparison of simple potential functions for simulating liquid water	Efficient estimation of free energy differences from Monte Carlo data	Madura J.D., Impey R.W., Chandrasekhar J., Jorgensen W.L., Klein M.L.	Bennett C.H., Bennett C.H., Bennett C.H., Bennett C.H., Bennett C.H.	0
188	10.1063/1.445869	10.1063/1.439486	402	Chemistry, Chemistry, Physics and Astronomy, Physics and Astronomy	Chemistry, Physics and Astronomy, Chemistry, Physics and Astronomy	Comparison of simple potential functions for simulating liquid water	Molecular dynamics simulations at constant pressure and/or temperature	Madura J.D., Impey R.W., Chandrasekhar J., Jorgensen W.L., Klein M.L.	Andersen H.C., Andersen H.C., Andersen H.C., Andersen H.C., Andersen H.C.	0
189	10.1063/1.445869	10.1016/0021-9991(83)90014-1	469	Chemistry, Chemistry, Physics and Astronomy, Physics and Astronomy	Computer Science, Physics and Astronomy, Computer Science, Physics and Astronomy	Comparison of simple potential functions for simulating liquid water	Rattle: A ""velocity"" version of the shake algorithm for molecular dynamics calculations	Madura J.D., Impey R.W., Chandrasekhar J., Jorgensen W.L., Klein M.L.	Andersen H.C., Andersen H.C., Andersen H.C., Andersen H.C., Andersen H.C.	0
190	10.1063/1.445869	10.1080/00268978300102851	384	Physics and Astronomy, Physics and Astronomy, Physics and Astronomy, Physics and Astronomy, Chemistry, Chemistry, Chemistry, Chemistry	Biochemistry, Genetics and Molecular Biology, Physics and Astronomy, Chemistry, Biochemistry, Genetics and Molecular Biology, Physics and Astronomy, Chemistry, Biochemistry, Genetics and Molecular Biology, Biochemistry, Genetics and Molecular Biology	Comparison of simple potential functions for simulating liquid water	Constant pressure molecular dynamics for molecular systems	Madura J.D., Impey R.W., Chandrasekhar J., Jorgensen W.L., Klein M.L., Madura J.D., Impey R.W., Chandrasekhar J., Jorgensen W.L., Klein M.L.	Klein M.L., Klein M.L., Klein M.L., Klein M.L., Klein M.L., Nose S., Nose S., Nose S., Nose S., Nose S.	0
191	10.1063/1.445869	10.1080/00268978400101201	713	Chemistry, Chemistry, Chemistry, Chemistry, Physics and Astronomy, Physics and Astronomy, Physics and Astronomy, Physics and Astronomy	Physics and Astronomy, Chemistry, Biochemistry, Genetics and Molecular Biology, Biochemistry, Genetics and Molecular Biology, Chemistry, Physics and Astronomy, Biochemistry, Genetics and Molecular Biology, Biochemistry, Genetics and Molecular Biology	Comparison of simple potential functions for simulating liquid water	A molecular dynamics method for simulations in the canonical ensemble	Madura J.D., Impey R.W., Chandrasekhar J., Jorgensen W.L., Klein M.L.	Nose S., Nose S., Nose S., Nose S., Nose S.	0
192	10.1016/0370-2693(90)91293-K	10.1103/PhysRevLett.41.1581	145	Physics and Astronomy	Physics and Astronomy	Search for hadronic b→u decays	Observables for the analysis of event shapes in e+e- annihilation and other processes	Oest T., Nilsson A.W., Kruger A., Harder G., Glaser R., Albrecht H., Darden C.W., Childers R., Zaitsev Yu., Tichomirov I., Tchistilin V., Soloshenko V., Shevchenko V., Semenov S., Semenov A., Rostovtsev A., Lubimov V., Gorelov I., Golutvin A., Fominykh B., Danilo M., Babaev A., Jonsson L., Cronstrom H.I., Kriznic E., Krizan P., Kernel G., Bostjancic B., Weseler S., Waldi R., Strahl K., Schubert K…	Wolfram S., Wolfram S., Wolfram S., Wolfram S., Wolfram S., Wolfram S., Wolfram S., Wolfram S., Wolfram S., Wolfram S., Wolfram S., Wolfram S., Wolfram S., Wolfram S., Wolfram S., Wolfram S., Wolfram S., Wolfram S., Wolfram S., Wolfram S., Wolfram S., Wolfram S., Wolfram S., Wolfram S., Wolfram S., Wolfram S., Wolfram S., Wolfram S., Wolfram S., Wolfram S., Wolfram S., Wolfram S., Wolfram S., Wol…	0
193		10.1063/1.448800	174	Chemistry, Chemistry	Chemistry, Physics and Astronomy	A formulation of the reaction coordinate	Ab initio effective core potentials for molecular calculations. Potentials for main group elements Na to Bi	Fukui K., Fukui K.	Hay P.J., Wadt W.R.	0
194		10.1021/cr00088a005	308	Chemistry	Chemistry	A formulation of the reaction coordinate	Intermolecular Interactions from a Natural Bond Orbital, Donor—Acceptor Viewpoint	Fukui K., Fukui K., Fukui K.	Curtiss L.A., Reed A.E., Weinhold F.	0
195		10.1063/1.448799	171	Chemistry, Chemistry	Chemistry, Physics and Astronomy	A formulation of the reaction coordinate	Ab initio effective core potentials for molecular calculations. Potentials for the transition metal atoms Sc to Hg	Fukui K., Fukui K.	Wadt W.R., Hay P.J.	0
196		10.1007/BF00533485	222	Chemistry	Health Professions	A formulation of the reaction coordinate	The influence of polarization functions on molecular orbital hydrogenation energies	Fukui K., Fukui K.	Pople J.A., Hariharan P.C.	0
197	10.1016/0003-4916(89)90322-9	10.1088/0305-4470/14/12/019	314	Physics and Astronomy, Physics and Astronomy, Physics and Astronomy	Physics and Astronomy, Physics and Astronomy, Mathematics	Optimal state-determination by mutually unbiased measurements	Geometrical description of quantal state determination	Fields B.D., Wootters W.K.	Ivonovic I.D., Ivonovic I.D.	1
198	10.1016/0008-8846(76)90007-7	10.1016/0020-7683(89)90050-4	175	Engineering, Engineering, Engineering, Engineering, Engineering, Engineering, Materials Science, Materials Science, Materials Science, Materials Science, Materials Science, Materials Science	Materials Science, Mathematics, Engineering, Engineering, Physics and Astronomy, Mathematics, Engineering, Engineering, Materials Science, Mathematics, Mathematics, Physics and Astronomy	Analysis of crack formation and crack growth in concrete by means of fracture mechanics and finite elements	A plastic-damage model for concrete	Hillerborg A., Modeer M., Petersson P.-E., Hillerborg A., Modeer M., Petersson P.-E., Hillerborg A., Modeer M., Petersson P.-E., Hillerborg A., Modeer M., Petersson P.-E.	Onate E., Onate E., Onate E., Lubliner J., Lubliner J., Lubliner J., Oliver J., Oliver J., Oliver J., Oller S., Oller S., Oller S.	1
199	10.1073/pnas.76.10.5269		357	General, General	Biochemistry, Genetics and Molecular Biology, General	Mathematical model for studying genetic variation in terms of restriction endonucleases	Analysis of gene diversity in subdivided populations	Li W.H., Nei M.	Nei M., Nei M.	0
200	10.1073/pnas.76.10.5269	10.1016/0040-5809(75)90020-9	289	General, General	Agricultural and Biological Sciences, Agricultural and Biological Sciences	Mathematical model for studying genetic variation in terms of restriction endonucleases	On the number of segregating sites in genetical models without recombination	Li W.H., Nei M.	Watterson G.A., Watterson G.A.	0
201	10.1073/pnas.76.10.5269		310	General	Biochemistry, Genetics and Molecular Biology	Mathematical model for studying genetic variation in terms of restriction endonucleases	Estimation of average heterozygosity and genetic distance from a small number of individuals	Li W.H., Nei M.	Nei M., Nei M.	0
202	10.1073/pnas.76.10.5269		198	General, General	Medicine, Biochemistry, Genetics and Molecular Biology	Mathematical model for studying genetic variation in terms of restriction endonucleases	Construction of a genetic linkage map in man using restriction fragment length polymorphisms	Li W.H., Nei M., Li W.H., Nei M., Li W.H., Nei M., Li W.H., Nei M.	White R.L., White R.L., Botstein D., Botstein D., Skolnick M., Skolnick M., Davis R.W., Davis R.W.	0
203		10.1063/1.438955	710	Physics and Astronomy, Physics and Astronomy	Physics and Astronomy, Chemistry	Gaussian basis set for molecular wavefunctions containing third-row atoms	Self-consistent molecular orbital methods. XX. A basis set for correlated wave functions	Wachtees A.J.H., Wachtees A.J.H., Wachtees A.J.H., Wachtees A.J.H.	Krishnan R., Seeger R., Binkley J.S., Pople J.A.	0
204	10.1063/1.448800	10.1063/1.438980	379	Chemistry, Physics and Astronomy, Chemistry, Physics and Astronomy	Physics and Astronomy, Physics and Astronomy, Chemistry, Chemistry	Ab initio effective core potentials for molecular calculations. Potentials for main group elements Na to Bi	Contracted Gaussian basis sets for molecular calculations. I. Second row atoms, Z=11-18	Wadt W.R., Hay P.J., Wadt W.R., Hay P.J.	McLean A.D., McLean A.D., Chandler G.S., Chandler G.S.	0
205	10.1063/1.448800	10.1063/1.438955	601	Physics and Astronomy, Chemistry, Chemistry, Physics and Astronomy	Chemistry, Chemistry, Physics and Astronomy, Physics and Astronomy	Ab initio effective core potentials for molecular calculations. Potentials for main group elements Na to Bi	Self-consistent molecular orbital methods. XX. A basis set for correlated wave functions	Wadt W.R., Hay P.J., Wadt W.R., Hay P.J., Wadt W.R., Hay P.J., Wadt W.R., Hay P.J.	Krishnan R., Krishnan R., Binkley J.S., Binkley J.S., Seeger R., Seeger R., Pople J.A., Pople J.A.	0
206	10.1063/1.448800	10.1021/ja00544a007	253	Chemistry, Chemistry, Chemistry, Physics and Astronomy, Physics and Astronomy, Physics and Astronomy, Physics and Astronomy, Chemistry	Biochemistry, Genetics and Molecular Biology, Chemical Engineering, Chemistry, Biochemistry, Genetics and Molecular Biology, Chemical Engineering, Chemical Engineering, Chemistry, Chemical Engineering	Ab initio effective core potentials for molecular calculations. Potentials for main group elements Na to Bi	Natural Hybrid Orbitals	Wadt W.R., Hay P.J., Wadt W.R., Hay P.J.	Weinhold F., Weinhold F., Foster J.P., Foster J.P.	0
207	10.1063/1.448800	10.1021/ar00072a001	241	Chemistry, Physics and Astronomy	Chemistry, Chemistry	Ab initio effective core potentials for molecular calculations. Potentials for main group elements Na to Bi	The Path of Chemical Reactions - The IRC Approach	Wadt W.R., Hay P.J.	Fukui K., Fukui K.	0
208	10.1063/1.448800	10.1002/jcc.540040303	270	Chemistry, Physics and Astronomy, Physics and Astronomy, Chemistry	Chemistry, Mathematics, Chemistry, Mathematics	Ab initio effective core potentials for molecular calculations. Potentials for main group elements Na to Bi	Efficient diffuse function‐augmented basis sets for anion calculations. III. The 3‐21+G basis set for first‐row elements, Li–F	Wadt W.R., Hay P.J., Wadt W.R., Hay P.J., Wadt W.R., Hay P.J., Wadt W.R., Hay P.J.	Clark T., Clark T., Chandrasekhar J., Chandrasekhar J., Schleyer P.V.R., Schleyer P.V.R., Spitznagel G.W., Spitznagel G.W.	0
209	10.1063/1.448800	10.1016/0009-2614(80)80628-2	238	Chemistry, Chemistry, Physics and Astronomy, Physics and Astronomy	Chemistry, Physics and Astronomy, Physics and Astronomy, Chemistry	Ab initio effective core potentials for molecular calculations. Potentials for main group elements Na to Bi	The isomers of silacyclopropane	Wadt W.R., Hay P.J.	Gordon M.S., Gordon M.S.	0
210	10.1002/adma.19920040409	10.1080/02678299308031946	133	Engineering, Engineering, Engineering, Engineering, Materials Science, Materials Science, Materials Science, Engineering, Engineering	Physics and Astronomy, Chemistry, Materials Science, Physics and Astronomy, Materials Science, Chemistry, Physics and Astronomy, Chemistry, Materials Science	A ferroelectric liquid crystal dimer: Synthesis and properties	The synthesis and high optical birefringence of nematogens incorporating 2,6-disubstituted naphthalenes and terminal cyano-substituent	Marcos M., Ezcurra A., Serrano J.L., Sierra T., Omenat A., Marcos M., Ezcurra A., Serrano J.L., Sierra T., Omenat A.	Hird M., Hird M., Hird M., Hird M., Hird M., Toyne K.J., Toyne K.J., Toyne K.J., Toyne K.J., Toyne K.J.	0
211	10.1002/adma.19920040409	10.1080/02678299308027752	136	Engineering, Materials Science, Materials Science, Engineering, Engineering, Materials Science, Engineering, Engineering, Engineering	Materials Science, Chemistry, Materials Science, Chemistry, Physics and Astronomy, Physics and Astronomy, Materials Science, Chemistry, Physics and Astronomy	A ferroelectric liquid crystal dimer: Synthesis and properties	Palladium-catalysed cross-coupling reactions in the synthesis of some high polarizability materials	Marcos M., Ezcurra A., Serrano J.L., Sierra T., Omenat A., Marcos M., Ezcurra A., Serrano J.L., Sierra T., Omenat A., Marcos M., Ezcurra A., Serrano J.L., Sierra T., Omenat A.	Toyne K.J., Toyne K.J., Toyne K.J., Toyne K.J., Toyne K.J., Hird M., Hird M., Hird M., Hird M., Hird M., Gray G.W., Gray G.W., Gray G.W., Gray G.W., Gray G.W.	0
212			219	Biochemistry, Genetics and Molecular Biology, General	Biochemistry, Genetics and Molecular Biology, Biochemistry, Genetics and Molecular Biology	Analysis of gene diversity in subdivided populations	Population studies on southwestern Indian tribes. II. Local genetic differentiation in the Papago.	Nei M., Nei M.	Workman P.L., Niswander J.D.	0
213			232	General, Biochemistry, Genetics and Molecular Biology, Biochemistry, Genetics and Molecular Biology, General	Biochemistry, Genetics and Molecular Biology, Medicine, Biochemistry, Genetics and Molecular Biology, Medicine	Analysis of gene diversity in subdivided populations	Construction of a genetic linkage map in man using restriction fragment length polymorphisms	Nei M., Nei M., Nei M., Nei M.	White R.L., Botstein D., Skolnick M., Davis R.W.	0
214	10.1016/0370-2693(77)90407-5	10.1103/PhysRevD.23.165	151	Physics and Astronomy, Physics and Astronomy	Physics and Astronomy, Physics and Astronomy	Nonconservation of total lepton number with scalar bosons	Neutrino masses and mixings in gauge models with spontaneous parity violation	Konetschny W., Kummer W., Konetschny W., Kummer W.	Mohapatra R.N., Mohapatra R.N., Senjanovic G., Senjanovic G.	0
215	10.1073/pnas.76.4.1967	10.1007/BF01731581	212	General, General, General, General, General, General, General, General	Biochemistry, Genetics and Molecular Biology, Biochemistry, Genetics and Molecular Biology, Biochemistry, Genetics and Molecular Biology, Agricultural and Biological Sciences, Biochemistry, Genetics and Molecular Biology, Medicine, Agricultural and Biological Sciences, Agricultural and Biological Sciences	Rapid evolution of animal mitochondrial DNA	A simple method for estimating evolutionary rates of base substitutions through comparative studies of nucleotide sequences	Wilson A.C., Brown W.M., George Jr. M.	Kimura M., Kimura M., Kimura M.	0
216	10.1007/BF00384745	10.1007/BF00374895	198	Earth and Planetary Sciences, Earth and Planetary Sciences, Earth and Planetary Sciences, Earth and Planetary Sciences, Earth and Planetary Sciences, Earth and Planetary Sciences, Earth and Planetary Sciences, Earth and Planetary Sciences	Environmental Science, Environmental Science, Earth and Planetary Sciences, Earth and Planetary Sciences, Earth and Planetary Sciences, Earth and Planetary Sciences, Earth and Planetary Sciences, Earth and Planetary Sciences	Geochemistry of eocene calc-alkaline volcanic rocks from the Kastamonu area, Northern Turkey	Nature and origin of A-type granites with particular reference to southeastern Australia	Taylor S.R., Peccerillo A., Taylor S.R., Peccerillo A., Taylor S.R., Peccerillo A., Taylor S.R., Peccerillo A.	Chappell B.W., Chappell B.W., White A.J.R., White A.J.R., Beams S.D., Beams S.D., Collins W.J., Collins W.J.	0
217	10.1007/BF00384745	10.1016/0012-821X(83)90211-X	269	Earth and Planetary Sciences, Earth and Planetary Sciences, Earth and Planetary Sciences, Earth and Planetary Sciences, Earth and Planetary Sciences, Earth and Planetary Sciences, Earth and Planetary Sciences, Earth and Planetary Sciences	Earth and Planetary Sciences, Earth and Planetary Sciences, Earth and Planetary Sciences, Earth and Planetary Sciences, Earth and Planetary Sciences, Earth and Planetary Sciences, Earth and Planetary Sciences, Earth and Planetary Sciences	Geochemistry of eocene calc-alkaline volcanic rocks from the Kastamonu area, Northern Turkey	Zircon saturation revisited: temperature and composition effects in a variety of crustal magma types	Taylor S.R., Peccerillo A., Taylor S.R., Peccerillo A.	Harrison T.M., Harrison T.M., Watson E.B., Watson E.B.	0
218	10.1007/BF00384745		423	Earth and Planetary Sciences, Earth and Planetary Sciences, Earth and Planetary Sciences, Earth and Planetary Sciences	Environmental Science, Earth and Planetary Sciences, Environmental Science, Earth and Planetary Sciences	Geochemistry of eocene calc-alkaline volcanic rocks from the Kastamonu area, Northern Turkey	Cosmochemistry of the rare earth elements: meteorite studies.	Taylor S.R., Peccerillo A.	Boynton W.V., Boynton W.V.	0
219	10.1007/BF00384745		224	Earth and Planetary Sciences, Earth and Planetary Sciences, Earth and Planetary Sciences, Earth and Planetary Sciences, Earth and Planetary Sciences, Earth and Planetary Sciences	Earth and Planetary Sciences, Earth and Planetary Sciences, Earth and Planetary Sciences, Earth and Planetary Sciences, Physics and Astronomy, Physics and Astronomy	Geochemistry of eocene calc-alkaline volcanic rocks from the Kastamonu area, Northern Turkey	Chemical geodynamics.	Taylor S.R., Peccerillo A., Taylor S.R., Peccerillo A.	Hart S., Hart S., Zindler A., Zindler A.	0
220	10.1007/BF00384745	10.1007/BF00402202	512	Earth and Planetary Sciences, Earth and Planetary Sciences, Earth and Planetary Sciences, Earth and Planetary Sciences	Earth and Planetary Sciences, Earth and Planetary Sciences, Earth and Planetary Sciences, Earth and Planetary Sciences	Geochemistry of eocene calc-alkaline volcanic rocks from the Kastamonu area, Northern Turkey	A-type granites: geochemical characteristics, discrimination and petrogenesis	Taylor S.R., Peccerillo A., Taylor S.R., Peccerillo A., Taylor S.R., Peccerillo A.	Chappell B.W., Chappell B.W., Currie K.L., Currie K.L., Whalen J.B., Whalen J.B.	0
221	10.1007/BF00384745	10.1016/0301-9268(91)90092-O	130	Earth and Planetary Sciences, Earth and Planetary Sciences, Earth and Planetary Sciences, Earth and Planetary Sciences	Earth and Planetary Sciences, Earth and Planetary Sciences, Earth and Planetary Sciences, Earth and Planetary Sciences	Geochemistry of eocene calc-alkaline volcanic rocks from the Kastamonu area, Northern Turkey	Partial melting of amphibolite/eclogite and the origin of Archean trondhjemites and tonalites	Taylor S.R., Peccerillo A., Taylor S.R., Peccerillo A., Taylor S.R., Peccerillo A.	Miller C.F., Miller C.F., Watson E.B., Watson E.B., Rapp R.P., Rapp R.P.	0
222	10.1007/BF00384745	10.1016/0009-2541(77)90057-2	214	Earth and Planetary Sciences, Earth and Planetary Sciences, Earth and Planetary Sciences, Earth and Planetary Sciences	Earth and Planetary Sciences, Earth and Planetary Sciences, Earth and Planetary Sciences, Earth and Planetary Sciences	Geochemistry of eocene calc-alkaline volcanic rocks from the Kastamonu area, Northern Turkey	Geochemical discrimination of different magma series and their differentiation products using immobile elements	Taylor S.R., Peccerillo A., Taylor S.R., Peccerillo A.	Winchester J.A., Winchester J.A., Floyd P.A., Floyd P.A.	0
223	10.1007/BF00384745	10.1016/0012-821X(77)90060-7	249	Earth and Planetary Sciences, Earth and Planetary Sciences, Earth and Planetary Sciences, Earth and Planetary Sciences, Earth and Planetary Sciences, Earth and Planetary Sciences, Earth and Planetary Sciences, Earth and Planetary Sciences	Earth and Planetary Sciences, Earth and Planetary Sciences, Earth and Planetary Sciences, Earth and Planetary Sciences, Earth and Planetary Sciences, Earth and Planetary Sciences, Earth and Planetary Sciences, Earth and Planetary Sciences	Geochemistry of eocene calc-alkaline volcanic rocks from the Kastamonu area, Northern Turkey	Subcommission on geochronology: Convention on the use of decay constants in geo- and cosmochronology	Taylor S.R., Peccerillo A., Taylor S.R., Peccerillo A.	Steiger R.H., Steiger R.H., Jager E., Jager E.	0
224	10.1007/BF00384745	10.1016/0012-821X(75)90088-6	169	Earth and Planetary Sciences, Earth and Planetary Sciences, Earth and Planetary Sciences, Earth and Planetary Sciences, Earth and Planetary Sciences, Earth and Planetary Sciences, Earth and Planetary Sciences, Earth and Planetary Sciences	Earth and Planetary Sciences, Earth and Planetary Sciences, Earth and Planetary Sciences, Earth and Planetary Sciences, Earth and Planetary Sciences, Earth and Planetary Sciences, Earth and Planetary Sciences, Earth and Planetary Sciences	Geochemistry of eocene calc-alkaline volcanic rocks from the Kastamonu area, Northern Turkey	Approximation of terrestrial lead isotope evolution by a two-stage model	Taylor S.R., Peccerillo A., Taylor S.R., Peccerillo A.	Kramers J.D., Kramers J.D., Stacey J.S., Stacey J.S.	0
225	10.1007/BF00384745	10.1016/0012-821X(80)90116-8	125	Earth and Planetary Sciences, Earth and Planetary Sciences, Earth and Planetary Sciences, Earth and Planetary Sciences, Earth and Planetary Sciences, Earth and Planetary Sciences, Earth and Planetary Sciences, Earth and Planetary Sciences	Earth and Planetary Sciences, Earth and Planetary Sciences, Earth and Planetary Sciences, Earth and Planetary Sciences, Earth and Planetary Sciences, Earth and Planetary Sciences, Earth and Planetary Sciences, Earth and Planetary Sciences	Geochemistry of eocene calc-alkaline volcanic rocks from the Kastamonu area, Northern Turkey	The application of a Th{single bond}Hf{single bond}Ta diagram to problems of tectonomagmatic classification and to establishing the nature of crustal contamination of basaltic lavas of the British Tertiary Volcanic Province	Taylor S.R., Peccerillo A.	Wood D.A., Wood D.A.	0
226	10.1007/BF00384745	10.1144/GSL.SP.1986.019.01.04	131	Earth and Planetary Sciences, Earth and Planetary Sciences, Earth and Planetary Sciences, Earth and Planetary Sciences, Earth and Planetary Sciences, Earth and Planetary Sciences	Earth and Planetary Sciences, Engineering, Environmental Science, Earth and Planetary Sciences, Engineering, Environmental Science	Geochemistry of eocene calc-alkaline volcanic rocks from the Kastamonu area, Northern Turkey	Geochemical characteristics of collision-zone magmatism	Taylor S.R., Peccerillo A., Taylor S.R., Peccerillo A., Taylor S.R., Peccerillo A.	Tindle A.G., Tindle A.G., Pearce J.A., Pearce J.A., Harris N.B.W., Harris N.B.W.	0
227	10.1007/BF00018060		814	Agricultural and Biological Sciences, Agricultural and Biological Sciences, Agricultural and Biological Sciences, Agricultural and Biological Sciences, Agricultural and Biological Sciences, Agricultural and Biological Sciences, Agricultural and Biological Sciences, Agricultural and Biological Sciences	Medicine, Biochemistry, Genetics and Molecular Biology, Biochemistry, Genetics and Molecular Biology, Biochemistry, Genetics and Molecular Biology, Agricultural and Biological Sciences, Medicine, Agricultural and Biological Sciences, Biochemistry, Genetics and Molecular Biology	Rapid determination of free proline for water-stress studies	Hydrogen peroxide is scavenged by ascorbate-specific peroxidase in spinach chloroplasts	Bates L.S., Teare I.D., Waldren R.P., Bates L.S., Teare I.D., Waldren R.P.	Nakano Y., Nakano Y., Nakano Y., Asada K., Asada K., Asada K.	0
228	10.1007/BF00018060	10.1038/227680a0	207	Agricultural and Biological Sciences, Agricultural and Biological Sciences	General, General	Rapid determination of free proline for water-stress studies	Cleavage of structural proteins during the assembly of the head of bacteriophage T4	Bates L.S., Teare I.D., Waldren R.P.	Laemmli U.K., Laemmli U.K., Laemmli U.K.	0
229	10.1007/BF00018060	10.1016/0003-2697(71)90370-8	569	Agricultural and Biological Sciences, Agricultural and Biological Sciences, Agricultural and Biological Sciences, Agricultural and Biological Sciences, Agricultural and Biological Sciences, Agricultural and Biological Sciences, Agricultural and Biological Sciences, Agricultural and Biological Sciences	Biochemistry, Genetics and Molecular Biology, Biochemistry, Genetics and Molecular Biology, Biochemistry, Genetics and Molecular Biology, Biochemistry, Genetics and Molecular Biology, Biochemistry, Genetics and Molecular Biology, Biochemistry, Genetics and Molecular Biology, Biochemistry, Genetics and Molecular Biology, Biochemistry, Genetics and Molecular Biology	Rapid determination of free proline for water-stress studies	Superoxide dismutase: Improved assays and an assay applicable to acrylamide gels	Bates L.S., Teare I.D., Waldren R.P., Bates L.S., Teare I.D., Waldren R.P.	Fridovich I., Fridovich I., Fridovich I., Beauchamp C., Beauchamp C., Beauchamp C.	0
230	10.1007/BF00018060	10.1016/0003-2697(76)90527-3	1718	Agricultural and Biological Sciences, Agricultural and Biological Sciences, Agricultural and Biological Sciences, Agricultural and Biological Sciences, Agricultural and Biological Sciences, Agricultural and Biological Sciences, Agricultural and Biological Sciences, Agricultural and Biological Sciences	Biochemistry, Genetics and Molecular Biology, Biochemistry, Genetics and Molecular Biology, Biochemistry, Genetics and Molecular Biology, Biochemistry, Genetics and Molecular Biology, Biochemistry, Genetics and Molecular Biology, Biochemistry, Genetics and Molecular Biology, Biochemistry, Genetics and Molecular Biology, Biochemistry, Genetics and Molecular Biology	Rapid determination of free proline for water-stress studies	A rapid and sensitive method for the quantitation of microgram quantities of protein utilizing the principle of protein-dye binding	Bates L.S., Teare I.D., Waldren R.P.	Bradford M.M., Bradford M.M., Bradford M.M.	0
231	10.1007/BF00018060	10.1093/jxb/32.1.93	345	Agricultural and Biological Sciences, Agricultural and Biological Sciences, Agricultural and Biological Sciences, Agricultural and Biological Sciences, Agricultural and Biological Sciences, Agricultural and Biological Sciences, Agricultural and Biological Sciences, Agricultural and Biological Sciences, Agricultural and Biological Sciences, Agricultural and Biological Sciences, Agricultural and Bi…	Decision Sciences, Agricultural and Biological Sciences, Agricultural and Biological Sciences, Biochemistry, Genetics and Molecular Biology, Environmental Science, Mathematics, Agricultural and Biological Sciences, Agricultural and Biological Sciences, Biochemistry, Genetics and Molecular Biology, Decision Sciences, Environmental Science, Mathematics	Rapid determination of free proline for water-stress studies	Leaf senescence: Correlated with increased levels of membrane permeability and lipid peroxidation, and decreased levels of superoxide dismutase and catalase	Bates L.S., Teare I.D., Waldren R.P., Bates L.S., Teare I.D., Waldren R.P., Bates L.S., Teare I.D., Waldren R.P.	Dhindsa R.S., Dhindsa R.S., Dhindsa R.S., Plumb-dhindsa P., Plumb-dhindsa P., Plumb-dhindsa P., Thorpe T.A., Thorpe T.A., Thorpe T.A.	0
232	10.1007/BF00018060	10.1111/j.1399-3054.1992.tb08764.x	143	Agricultural and Biological Sciences, Agricultural and Biological Sciences, Agricultural and Biological Sciences, Agricultural and Biological Sciences, Agricultural and Biological Sciences, Agricultural and Biological Sciences, Agricultural and Biological Sciences, Agricultural and Biological Sciences	Agricultural and Biological Sciences, Biochemistry, Genetics and Molecular Biology, Biochemistry, Genetics and Molecular Biology, Biochemistry, Genetics and Molecular Biology, Agricultural and Biological Sciences, Biochemistry, Genetics and Molecular Biology, Biochemistry, Genetics and Molecular Biology, Biochemistry, Genetics and Molecular Biology	Rapid determination of free proline for water-stress studies	Water stress induced changes in concentrations of proline and total soluble sugars in nodulated alfalfa (Medicago sativd) plants	Bates L.S., Teare I.D., Waldren R.P., Bates L.S., Teare I.D., Waldren R.P., Bates L.S., Teare I.D., Waldren R.P.	Sanchez-Diaz M., Sanchez-Diaz M., Sanchez-Diaz M., Irigoyen J.J., Irigoyen J.J., Irigoyen J.J., Einerich D.W., Einerich D.W., Einerich D.W.	0
233	10.1007/BF00018060	10.1111/j.1399-3054.1983.tb04162.x	166	Agricultural and Biological Sciences, Agricultural and Biological Sciences, Agricultural and Biological Sciences, Agricultural and Biological Sciences, Agricultural and Biological Sciences, Agricultural and Biological Sciences, Agricultural and Biological Sciences, Agricultural and Biological Sciences	Agricultural and Biological Sciences, Biochemistry, Genetics and Molecular Biology, Biochemistry, Genetics and Molecular Biology, Biochemistry, Genetics and Molecular Biology, Agricultural and Biological Sciences, Biochemistry, Genetics and Molecular Biology, Biochemistry, Genetics and Molecular Biology, Biochemistry, Genetics and Molecular Biology	Rapid determination of free proline for water-stress studies	Implications of water stress‐induced changes in the levels of endogenous ascorbic acid and hydrogen peroxide in Vigna seedlings	Bates L.S., Teare I.D., Waldren R.P., Bates L.S., Teare I.D., Waldren R.P.	Mukherjee S.P., Mukherjee S.P., Mukherjee S.P., Choudhuri M.A., Choudhuri M.A., Choudhuri M.A.	1
234	10.1093/petrology/28.6.1111	10.1144/GSL.SP.1989.042.01.19	101	Earth and Planetary Sciences, Earth and Planetary Sciences, Earth and Planetary Sciences, Earth and Planetary Sciences, Earth and Planetary Sciences, Earth and Planetary Sciences	Engineering, Engineering, Earth and Planetary Sciences, Environmental Science, Environmental Science, Earth and Planetary Sciences	The importance of residual source material (restite) in granite petrogenesis	Chemical and isotopic systematics of oceanic basalts: Implications for mantle composition and processes	Wyborn D., Chappell B.W., White A.J.R., Wyborn D., Chappell B.W., White A.J.R.	McDonough W.F., McDonough W.F., McDonough W.F., Sun S.-S., Sun S.-S., Sun S.-S.	0
235	10.1016/0370-2693(80)90349-4	10.1016/0370-2693(77)90435-X	202	Physics and Astronomy	Physics and Astronomy	A theory of lepton number violation and neutrino Majorana masses	μ→eγ at a rate of one out of 109 muon decays?	Zee A.	Minkowski P.	0
236	10.1016/0370-2693(73)90490-5	10.1103/PhysRevD.4.1109	108	Physics and Astronomy, Physics and Astronomy	Physics and Astronomy, Physics and Astronomy	Is the neutrino a goldstone particle?	Quark model of dual pions	Volkov D.V., Akulov V.P., Volkov D.V., Akulov V.P.	Neveu A., Neveu A., Schwarz J.H., Schwarz J.H.	0
237		10.1038/227680a0	234	Agricultural and Biological Sciences, Biochemistry, Genetics and Molecular Biology, Biochemistry, Genetics and Molecular Biology, Medicine	General, General, General, General	Hydrogen peroxide is scavenged by ascorbate-specific peroxidase in spinach chloroplasts	Cleavage of structural proteins during the assembly of the head of bacteriophage T4	Asada K., Nakano Y.	Laemmli U.K., Laemmli U.K.	0
238		10.1016/0003-2697(71)90370-8	861	Biochemistry, Genetics and Molecular Biology, Biochemistry, Genetics and Molecular Biology, Biochemistry, Genetics and Molecular Biology, Agricultural and Biological Sciences, Agricultural and Biological Sciences, Agricultural and Biological Sciences, Biochemistry, Genetics and Molecular Biology, Agricultural and Biological Sciences, Biochemistry, Genetics and Molecular Biology, Biochemistry, Gen…	Biochemistry, Genetics and Molecular Biology, Biochemistry, Genetics and Molecular Biology, Biochemistry, Genetics and Molecular Biology, Biochemistry, Genetics and Molecular Biology, Biochemistry, Genetics and Molecular Biology, Biochemistry, Genetics and Molecular Biology, Biochemistry, Genetics and Molecular Biology, Biochemistry, Genetics and Molecular Biology, Biochemistry, Genetics and Mole…	Hydrogen peroxide is scavenged by ascorbate-specific peroxidase in spinach chloroplasts	Superoxide dismutase: Improved assays and an assay applicable to acrylamide gels	Asada K., Nakano Y., Asada K., Nakano Y.	Beauchamp C., Beauchamp C., Fridovich I., Fridovich I.	0
239		10.1016/0003-2697(80)90139-6	279	Biochemistry, Genetics and Molecular Biology, Agricultural and Biological Sciences, Agricultural and Biological Sciences, Biochemistry, Genetics and Molecular Biology, Agricultural and Biological Sciences, Agricultural and Biological Sciences, Biochemistry, Genetics and Molecular Biology, Biochemistry, Genetics and Molecular Biology, Biochemistry, Genetics and Molecular Biology, Biochemistry, Gen…	Biochemistry, Genetics and Molecular Biology, Biochemistry, Genetics and Molecular Biology, Biochemistry, Genetics and Molecular Biology, Biochemistry, Genetics and Molecular Biology, Biochemistry, Genetics and Molecular Biology, Biochemistry, Genetics and Molecular Biology, Biochemistry, Genetics and Molecular Biology, Biochemistry, Genetics and Molecular Biology, Biochemistry, Genetics and Mole…	Hydrogen peroxide is scavenged by ascorbate-specific peroxidase in spinach chloroplasts	Determination of glutathione and glutathione disulfide using glutathione reductase and 2-vinylpyridine	Asada K., Nakano Y.	Griffith O.W., Griffith O.W.	0
240		10.1016/S0076-6879(84)05016-3	999	Agricultural and Biological Sciences, Biochemistry, Genetics and Molecular Biology, Medicine, Medicine, Agricultural and Biological Sciences, Biochemistry, Genetics and Molecular Biology, Biochemistry, Genetics and Molecular Biology, Biochemistry, Genetics and Molecular Biology	Biochemistry, Genetics and Molecular Biology, Biochemistry, Genetics and Molecular Biology, Biochemistry, Genetics and Molecular Biology, Biochemistry, Genetics and Molecular Biology, Biochemistry, Genetics and Molecular Biology, Biochemistry, Genetics and Molecular Biology, Biochemistry, Genetics and Molecular Biology, Biochemistry, Genetics and Molecular Biology	Hydrogen peroxide is scavenged by ascorbate-specific peroxidase in spinach chloroplasts	[13] Catalase in Vitro	Asada K., Nakano Y.	Aebi H., Aebi H.	0
241		10.1016/0003-2697(84)90039-3	204	Agricultural and Biological Sciences, Agricultural and Biological Sciences, Agricultural and Biological Sciences, Biochemistry, Genetics and Molecular Biology, Biochemistry, Genetics and Molecular Biology, Biochemistry, Genetics and Molecular Biology, Biochemistry, Genetics and Molecular Biology, Biochemistry, Genetics and Molecular Biology, Agricultural and Biological Sciences, Biochemistry, Gen…	Biochemistry, Genetics and Molecular Biology, Biochemistry, Genetics and Molecular Biology, Biochemistry, Genetics and Molecular Biology, Biochemistry, Genetics and Molecular Biology, Biochemistry, Genetics and Molecular Biology, Biochemistry, Genetics and Molecular Biology, Biochemistry, Genetics and Molecular Biology, Biochemistry, Genetics and Molecular Biology, Biochemistry, Genetics and Mole…	Hydrogen peroxide is scavenged by ascorbate-specific peroxidase in spinach chloroplasts	Estimation of hydrogen peroxide in plant extracts using titanium(IV)	Asada K., Nakano Y., Asada K., Nakano Y., Asada K., Nakano Y.	Ferguson I.B., Ferguson I.B., MacRae E.A., MacRae E.A., Patterson B.D., Patterson B.D.	0
242		10.1016/0003-2697(88)90564-7	176	Agricultural and Biological Sciences, Medicine, Medicine, Biochemistry, Genetics and Molecular Biology, Biochemistry, Genetics and Molecular Biology, Biochemistry, Genetics and Molecular Biology, Biochemistry, Genetics and Molecular Biology, Biochemistry, Genetics and Molecular Biology, Medicine, Agricultural and Biological Sciences, Agricultural and Biological Sciences, Biochemistry, Genetics an…	Biochemistry, Genetics and Molecular Biology, Biochemistry, Genetics and Molecular Biology, Biochemistry, Genetics and Molecular Biology, Biochemistry, Genetics and Molecular Biology, Biochemistry, Genetics and Molecular Biology, Biochemistry, Genetics and Molecular Biology, Biochemistry, Genetics and Molecular Biology, Biochemistry, Genetics and Molecular Biology, Biochemistry, Genetics and Mole…	Hydrogen peroxide is scavenged by ascorbate-specific peroxidase in spinach chloroplasts	Assay of glutathione reductase in crude tissue homogenates using 5,5′-dithiobis(2-nitrobenzoic acid)	Asada K., Nakano Y., Asada K., Nakano Y., Asada K., Nakano Y.	Smith I.K., Smith I.K., Thorne C.A., Thorne C.A., Vierheller T.L., Vierheller T.L.	0
243		10.1093/jxb/32.1.93	499	Biochemistry, Genetics and Molecular Biology, Agricultural and Biological Sciences, Agricultural and Biological Sciences, Agricultural and Biological Sciences, Agricultural and Biological Sciences, Agricultural and Biological Sciences, Agricultural and Biological Sciences, Biochemistry, Genetics and Molecular Biology, Biochemistry, Genetics and Molecular Biology, Biochemistry, Genetics and Molecu…	Agricultural and Biological Sciences, Agricultural and Biological Sciences, Agricultural and Biological Sciences, Biochemistry, Genetics and Molecular Biology, Decision Sciences, Environmental Science, Mathematics, Agricultural and Biological Sciences, Agricultural and Biological Sciences, Biochemistry, Genetics and Molecular Biology, Decision Sciences, Environmental Science, Mathematics, Agricul…	Hydrogen peroxide is scavenged by ascorbate-specific peroxidase in spinach chloroplasts	Leaf senescence: Correlated with increased levels of membrane permeability and lipid peroxidation, and decreased levels of superoxide dismutase and catalase	Asada K., Nakano Y., Asada K., Nakano Y., Asada K., Nakano Y.	Dhindsa R.S., Dhindsa R.S., Plumb-dhindsa P., Plumb-dhindsa P., Thorpe T.A., Thorpe T.A.	0
244		10.1016/0076-6879(87)48036-1	341	Medicine, Agricultural and Biological Sciences, Agricultural and Biological Sciences, Biochemistry, Genetics and Molecular Biology, Biochemistry, Genetics and Molecular Biology, Biochemistry, Genetics and Molecular Biology, Biochemistry, Genetics and Molecular Biology, Medicine	Biochemistry, Genetics and Molecular Biology, Biochemistry, Genetics and Molecular Biology, Biochemistry, Genetics and Molecular Biology, Biochemistry, Genetics and Molecular Biology, Biochemistry, Genetics and Molecular Biology, Biochemistry, Genetics and Molecular Biology, Biochemistry, Genetics and Molecular Biology, Biochemistry, Genetics and Molecular Biology	Hydrogen peroxide is scavenged by ascorbate-specific peroxidase in spinach chloroplasts	Chlorophylls and Carotenoids: Pigments of Photosynthetic Biomembranes	Asada K., Nakano Y.	Lichtenthaler H.K., Lichtenthaler H.K.	0
245		10.1111/j.1399-3054.1991.tb00121.x	172	Biochemistry, Genetics and Molecular Biology, Agricultural and Biological Sciences, Agricultural and Biological Sciences, Agricultural and Biological Sciences, Agricultural and Biological Sciences, Biochemistry, Genetics and Molecular Biology, Biochemistry, Genetics and Molecular Biology, Medicine, Medicine, Medicine, Medicine, Biochemistry, Genetics and Molecular Biology, Biochemistry, Genetics …	Biochemistry, Genetics and Molecular Biology, Agricultural and Biological Sciences, Biochemistry, Genetics and Molecular Biology, Biochemistry, Genetics and Molecular Biology, Biochemistry, Genetics and Molecular Biology, Agricultural and Biological Sciences, Biochemistry, Genetics and Molecular Biology, Biochemistry, Genetics and Molecular Biology, Biochemistry, Genetics and Molecular Biology, B…	Hydrogen peroxide is scavenged by ascorbate-specific peroxidase in spinach chloroplasts	Effect of aluminium on lipid peroxidation, superoxide dismutase, catalase, and peroxidase activities in root tips of soybean (Glycine max)	Asada K., Nakano Y., Asada K., Nakano Y.	Horst W.J., Horst W.J., Cakmak I., Cakmak I.	0
246		10.1111/j.1399-3054.1983.tb04162.x	194	Agricultural and Biological Sciences, Agricultural and Biological Sciences, Agricultural and Biological Sciences, Biochemistry, Genetics and Molecular Biology, Biochemistry, Genetics and Molecular Biology, Medicine, Medicine, Medicine, Biochemistry, Genetics and Molecular Biology, Biochemistry, Genetics and Molecular Biology, Biochemistry, Genetics and Molecular Biology, Medicine, Biochemistry, G…	Agricultural and Biological Sciences, Biochemistry, Genetics and Molecular Biology, Biochemistry, Genetics and Molecular Biology, Agricultural and Biological Sciences, Biochemistry, Genetics and Molecular Biology, Biochemistry, Genetics and Molecular Biology, Biochemistry, Genetics and Molecular Biology, Biochemistry, Genetics and Molecular Biology, Biochemistry, Genetics and Molecular Biology, B…	Hydrogen peroxide is scavenged by ascorbate-specific peroxidase in spinach chloroplasts	Implications of water stress‐induced changes in the levels of endogenous ascorbic acid and hydrogen peroxide in Vigna seedlings	Asada K., Nakano Y., Asada K., Nakano Y.	Mukherjee S.P., Mukherjee S.P., Choudhuri M.A., Choudhuri M.A.	0
247	10.1016/0003-4916(84)90242-2	10.1016/0550-3213(74)90154-0	222	Physics and Astronomy	Physics and Astronomy	Chiral perturbation theory to one loop	A planar diagram theory for strong interactions	Leutwyler H., Gasser J.	Hooft G.'t., Hooft G.'t.	0
248	10.1007/BF00381441	10.1144/GSL.SP.1989.042.01.19	100	Earth and Planetary Sciences, Earth and Planetary Sciences, Earth and Planetary Sciences, Earth and Planetary Sciences, Earth and Planetary Sciences, Earth and Planetary Sciences	Earth and Planetary Sciences, Engineering, Earth and Planetary Sciences, Engineering, Environmental Science, Environmental Science	Zircon and granite petrology	Chemical and isotopic systematics of oceanic basalts: Implications for mantle composition and processes	Pupin J.P., Pupin J.P.	Sun S.-S., McDonough W.F.	0
249	10.1007/BF00045689	10.1016/0377-0427(84)90075-X	200	Engineering, Engineering, Engineering, Materials Science, Materials Science, Engineering, Engineering, Engineering	Mathematics, Mathematics, Mathematics, Mathematics, Mathematics, Mathematics, Mathematics, Mathematics	Thermoelasticity	A method for the numerical inversion of Laplace transforms	Green A.E., Lindsay K.A., Green A.E., Lindsay K.A.	Honig G., Honig G., Hirdes U., Hirdes U.	0
250	10.1021/cr00088a005	10.1021/ja00364a005	396	Chemistry, Chemistry, Chemistry, Chemistry	Chemistry, Chemical Engineering, Biochemistry, Genetics and Molecular Biology, Chemical Engineering	Intermolecular Interactions from a Natural Bond Orbital, Donor—Acceptor Viewpoint	Absolute Hardness: Companion Parameter to Absolute Electronegativity	Weinhold F., Curtiss L.A., Reed A.E., Weinhold F., Curtiss L.A., Reed A.E.	Pearson R.G., Pearson R.G., Pearson R.G., Parr R.G., Parr R.G., Parr R.G.	0
251	10.1021/cr00088a005	10.1007/BF02401406	255	Chemistry	Health Professions	Intermolecular Interactions from a Natural Bond Orbital, Donor—Acceptor Viewpoint	On the calculation of bonding energies by the Hartree Fock Slater method - I. The transition state method	Weinhold F., Curtiss L.A., Reed A.E., Weinhold F., Curtiss L.A., Reed A.E.	Ziegler T., Ziegler T., Ziegler T., Rauk A., Rauk A., Rauk A.	0
252	10.1021/cr00088a005	10.1021/ic50196a034	171	Chemistry, Chemistry	Chemistry, Chemistry	Intermolecular Interactions from a Natural Bond Orbital, Donor—Acceptor Viewpoint	A Theoretical Study of the Ethylene-Metal Bond in Complexes between Cu+, Ag+, Au+, Pt0, or Pt2+ and Ethylene, Based on the Hartree-Fock-Slater Transition-State Method	Weinhold F., Curtiss L.A., Reed A.E., Weinhold F., Curtiss L.A., Reed A.E.	Rauk A., Rauk A., Rauk A., Ziegler T., Ziegler T., Ziegler T.	0
253	10.1021/cr00088a005	10.1063/1.455064	141	Chemistry, Chemistry	Chemistry, Physics and Astronomy	Intermolecular Interactions from a Natural Bond Orbital, Donor—Acceptor Viewpoint	A complete basis set model chemistry. I. The total energies of closed-shell atoms and hydrides of the first-row elements	Weinhold F., Curtiss L.A., Reed A.E., Weinhold F., Curtiss L.A., Reed A.E., Weinhold F., Curtiss L.A., Reed A.E., Weinhold F., Curtiss L.A., Reed A.E., Weinhold F., Curtiss L.A., Reed A.E., Weinhold F., Curtiss L.A., Reed A.E.	Bennett A., Bennett A., Bennett A., Petersson G.A., Petersson G.A., Petersson G.A., Mantzaris J., Mantzaris J., Mantzaris J., Shirley W.A., Shirley W.A., Shirley W.A., Al-Laham M.A., Al-Laham M.A., Al-Laham M.A., Tensfeldt T.G., Tensfeldt T.G., Tensfeldt T.G.	0
254	10.1016/0550-3213(91)90266-Z	10.1103/PhysRevD.48.2826	142	Physics and Astronomy	Physics and Astronomy	Duality symmetric closed string theory and interacting chiral scalars	Superspace duality in low-energy superstrings	Tseytlin A.A.	Siegel W.	0
255	10.1016/0370-2693(77)90435-X	10.1103/PhysRevD.23.165	758	Physics and Astronomy, Physics and Astronomy	Physics and Astronomy, Physics and Astronomy	μ→eγ at a rate of one out of 109 muon decays?	Neutrino masses and mixings in gauge models with spontaneous parity violation	Minkowski P., Minkowski P.	Mohapatra R.N., Senjanovic G.	0
256	10.1016/0370-2693(77)90435-X	10.1103/PhysRevLett.57.961	168	Physics and Astronomy	Physics and Astronomy	μ→eγ at a rate of one out of 109 muon decays?	Large muon- and electron-number nonconservation in supergravity theories	Minkowski P., Minkowski P.	Borzumati F., Masiero A.	0
257	10.1088/0022-3727/4/10/319	10.1063/1.97359	355	Physics and Astronomy	Physics and Astronomy	Studies of tunnel MOS diodes I. Interface effects in silicon Schottky diodes	Extraction of Schottky diode parameters from forward current-voltage characteristics	Card H.C., Rhoderick E.H., Card H.C., Rhoderick E.H.	Cheung S.K., Cheung S.K., Cheung N.W., Cheung N.W.	0
258	10.1088/0022-3727/4/10/319	10.1063/1.325607	201	Physics and Astronomy	Physics and Astronomy	Studies of tunnel MOS diodes I. Interface effects in silicon Schottky diodes	A modified forward I-V plot for Schottky diodes with high series resistance	Card H.C., Rhoderick E.H.	Norde H., Norde H.	0
259	10.1103/PhysRevLett.52.997	10.1103/PhysRevB.33.8822	276	Physics and Astronomy	Physics and Astronomy	Density-functional theory for time-dependent systems	Density-functional approximation for the correlation energy of the inhomogeneous electron gas	Gross E.K.U., Runge E.	Perdew J.P., Perdew J.P.	0
260	10.1103/PhysRevLett.56.930	10.1126/science.347575	185	Physics and Astronomy	General	Atomic force microscope	Models for the specific adhesion of cells to cells	Quate C.F., Binnig G., Gerber Ch.	Bell G.I., Bell G.I., Bell G.I.	0
261	10.1016/0165-4101(83)90011-3	10.1016/0304-405X(76)90026-X	271	Economics, Econometrics and Finance, Economics, Econometrics and Finance, Business, Management and Accounting, Economics, Econometrics and Finance, Economics, Econometrics and Finance, Business, Management and Accounting, Business, Management and Accounting, Business, Management and Accounting, Economics, Econometrics and Finance, Economics, Econometrics and Finance, Economics, Econometrics and F…	Economics, Econometrics and Finance, Business, Management and Accounting, Business, Management and Accounting, Business, Management and Accounting, Economics, Econometrics and Finance, Business, Management and Accounting, Economics, Econometrics and Finance, Economics, Econometrics and Finance, Business, Management and Accounting, Business, Management and Accounting, Economics, Econometrics and F…	Discretionary disclosure	Theory of the firm: Managerial behavior, agency costs and ownership structure	Verrecchia R.E., Verrecchia R.E.	Meckling W.H., Jensen M.C.	0
262	10.1016/S0022-5193(70)80032-7	10.1016/S0006-3495(74)85959-X	221	Mathematics, Agricultural and Biological Sciences, Immunology and Microbiology, Biochemistry, Genetics and Molecular Biology, Mathematics, Mathematics	Biochemistry, Genetics and Molecular Biology, Biochemistry, Genetics and Molecular Biology, Biochemistry, Genetics and Molecular Biology, Biochemistry, Genetics and Molecular Biology, Biochemistry, Genetics and Molecular Biology, Biochemistry, Genetics and Molecular Biology	The minimum energy of bending as a possible explanation of the biconcave shape of the human red blood cell	Bending Resistance and Chemically Induced Moments in Membrane Bilayers	Canham P.B.	Evans E.A.	0
263	10.1016/S0022-5193(70)80032-7	10.1515/znc-1973-11-1209	525	Mathematics, Mathematics, Mathematics, Immunology and Microbiology, Biochemistry, Genetics and Molecular Biology, Agricultural and Biological Sciences	Biochemistry, Genetics and Molecular Biology, Biochemistry, Genetics and Molecular Biology, Biochemistry, Genetics and Molecular Biology, Biochemistry, Genetics and Molecular Biology, Biochemistry, Genetics and Molecular Biology, Biochemistry, Genetics and Molecular Biology	The minimum energy of bending as a possible explanation of the biconcave shape of the human red blood cell	Elastic Properties of Lipid Bilayers: Theory and Possible Experiments	Canham P.B.	Helfrich W.	0
264		10.1111/j.1469-1809.1977.tb01918.x	169	Biochemistry, Genetics and Molecular Biology, Biochemistry, Genetics and Molecular Biology	Biochemistry, Genetics and Molecular Biology, Medicine	Population studies on southwestern Indian tribes. II. Local genetic differentiation in the Papago.	F‐statistics and analysis of gene diversity in subdivided populations	Workman P.L., Niswander J.D.	NEI M., NEI M.	0
265	10.1111/j.1432-1033.1970.tb00830.x	10.1016/0003-2697(77)90720-5	635	Biochemistry, Genetics and Molecular Biology, Biochemistry, Genetics and Molecular Biology, Biochemistry, Genetics and Molecular Biology, Biochemistry, Genetics and Molecular Biology	Biochemistry, Genetics and Molecular Biology, Biochemistry, Genetics and Molecular Biology, Biochemistry, Genetics and Molecular Biology, Biochemistry, Genetics and Molecular Biology	The Quantitative Measurement of DNA Hybridization from Renaturation Rates	A rapid method for the base ratio determination of bacterial DNA	Ley J.D., Reynaerts A., Cattoir H., Ley J.D., Reynaerts A., Cattoir H., Ley J.D., Reynaerts A., Cattoir H., Ley J.D., Reynaerts A., Cattoir H.	Holder-Franklin M.A., Holder-Franklin M.A., Holder-Franklin M.A., Franklin M., Franklin M., Franklin M., McCully J., McCully J., McCully J., Cashion P., Cashion P., Cashion P.	1
266	10.1111/j.1432-1033.1970.tb00830.x	10.1002/bip.1980.360190708	207	Biochemistry, Genetics and Molecular Biology, Biochemistry, Genetics and Molecular Biology, Biochemistry, Genetics and Molecular Biology, Biochemistry, Genetics and Molecular Biology	Materials Science, Chemistry, Biochemistry, Genetics and Molecular Biology, Biochemistry, Genetics and Molecular Biology	The Quantitative Measurement of DNA Hybridization from Renaturation Rates	Thermal stability and renaturation of DNA in dimethyl sulfoxide solutions: Acceleration of the renaturation rate	Ley J.D., Reynaerts A., Cattoir H., Ley J.D., Reynaerts A., Cattoir H.	Escara J.F., Escara J.F., Escara J.F., Hutton J.R., Hutton J.R., Hutton J.R.	0
267	10.1111/j.1600-0447.1970.tb02066.x	10.1192/bjp.134.4.382	267	Medicine, Medicine	Medicine, Medicine	A RATING SCALE FOR EXTRAPYRAMIDAL SIDE EFFECTS	A new depression scale designed to be sensitive to change	B. M., SIMPSON G.M., M. D.P., P. F.R.C., ANGUS J.W.S., B. GH., B. M., SIMPSON G.M., M. D.P., P. F.R.C., ANGUS J.W.S., B. GH.	Asberg M., Asberg M., Asberg M., Asberg M., Asberg M., Asberg M., Montgomery S.A., Montgomery S.A., Montgomery S.A., Montgomery S.A., Montgomery S.A., Montgomery S.A.	0
268	10.1016/0022-5193(70)90092-5	10.1016/0022-5193(71)90050-6	270	Agricultural and Biological Sciences, Agricultural and Biological Sciences, Agricultural and Biological Sciences, Agricultural and Biological Sciences, Agricultural and Biological Sciences, Agricultural and Biological Sciences, Agricultural and Biological Sciences, Biochemistry, Genetics and Molecular Biology, Biochemistry, Genetics and Molecular Biology, Biochemistry, Genetics and Molecular Biol…	Agricultural and Biological Sciences, Biochemistry, Genetics and Molecular Biology, Immunology and Microbiology, Mathematics, Mathematics, Mathematics, Medicine, Agricultural and Biological Sciences, Biochemistry, Genetics and Molecular Biology, Immunology and Microbiology, Mathematics, Mathematics, Mathematics, Medicine, Agricultural and Biological Sciences, Biochemistry, Genetics and Molecular …	Initiation of slime mold aggregation viewed as an instability	Model for chemotaxis	Segel L.A., Keller E.F., Segel L.A., Keller E.F.	Segel L.A., Segel L.A., Keller E.F., Keller E.F.	1
269	10.1093/geront/10.1_Part_1.20	10.1016/0022-3956(75)90026-6	739	Medicine, Medicine, Nursing, Nursing	Medicine, Neuroscience, Medicine, Neuroscience	Progress in development of the index of ADL.	""Mini-mental state"". A practical method for grading the cognitive state of patients for the clinician	Downs T.D., Katz S., Cash H.R., Grotz R.C., Downs T.D., Katz S., Cash H.R., Grotz R.C., Downs T.D., Katz S., Cash H.R., Grotz R.C.	Folstein S.E., Folstein S.E., Folstein S.E., Folstein S.E., McHugh P.R., McHugh P.R., McHugh P.R., McHugh P.R., Folstein M.F., Folstein M.F., Folstein M.F., Folstein M.F.	0
270	10.1016/0022-1694(70)90255-6	10.1080/02626667909491834	504	Earth and Planetary Sciences, Agricultural and Biological Sciences, Agricultural and Biological Sciences, Agricultural and Biological Sciences, Earth and Planetary Sciences, Agricultural and Biological Sciences, Earth and Planetary Sciences, Earth and Planetary Sciences	Environmental Science, Earth and Planetary Sciences, Engineering, Environmental Science, Environmental Science, Environmental Science, Earth and Planetary Sciences, Engineering	River flow forecasting through conceptual models part I - A discussion of principles	A physically based, variable contributing area model of basin hydrology	Nash J.E., Sutcliffe J.V., Nash J.E., Sutcliffe J.V.	Kirkby M.J., Kirkby M.J., Beven K.J., Beven K.J.	0
271	10.1016/0022-1694(70)90255-6	10.2136/sssaj1980.03615995004400050002x	405	Earth and Planetary Sciences, Agricultural and Biological Sciences	Agricultural and Biological Sciences, Agricultural and Biological Sciences	River flow forecasting through conceptual models part I - A discussion of principles	CLOSED-FORM EQUATION FOR PREDICTING THE HYDRAULIC CONDUCTIVITY OF UNSATURATED SOILS.	Nash J.E., Sutcliffe J.V.	van Genuchten M.Th., van Genuchten M.Th.	0
272	10.1016/0022-1694(70)90255-6	10.1080/02723646.1981.10642213	313	Earth and Planetary Sciences, Earth and Planetary Sciences, Agricultural and Biological Sciences, Agricultural and Biological Sciences, Agricultural and Biological Sciences, Agricultural and Biological Sciences, Earth and Planetary Sciences, Earth and Planetary Sciences	Environmental Science, Earth and Planetary Sciences, Earth and Planetary Sciences, Environmental Science, Earth and Planetary Sciences, Earth and Planetary Sciences, Earth and Planetary Sciences, Earth and Planetary Sciences	River flow forecasting through conceptual models part I - A discussion of principles	On the validation of models	Nash J.E., Sutcliffe J.V.	Willmott C.J., Willmott C.J.	0
273	10.1016/0022-1694(70)90255-6	10.1080/02626668609491024	300	Earth and Planetary Sciences, Agricultural and Biological Sciences	Environmental Science, Environmental Science	River flow forecasting through conceptual models part I - A discussion of principles	Operational testing of hydrological simulation models	Nash J.E., Sutcliffe J.V.	KlemeS V., KlemeS V.	0
274	10.1016/0022-1694(70)90255-6	10.1016/0169-7722(91)90038-3	139	Earth and Planetary Sciences, Agricultural and Biological Sciences, Agricultural and Biological Sciences, Agricultural and Biological Sciences, Agricultural and Biological Sciences, Agricultural and Biological Sciences, Earth and Planetary Sciences, Earth and Planetary Sciences, Earth and Planetary Sciences, Earth and Planetary Sciences	Environmental Science, Earth and Planetary Sciences, Earth and Planetary Sciences, Environmental Science, Environmental Science, Environmental Science, Earth and Planetary Sciences, Earth and Planetary Sciences, Environmental Science, Environmental Science	River flow forecasting through conceptual models part I - A discussion of principles	Statistical and graphical methods for evaluating solute transport models: Overview and application	Nash J.E., Sutcliffe J.V., Nash J.E., Sutcliffe J.V.	Green R.E., Green R.E., Loague K., Loague K.	0
275	10.1016/0022-1694(70)90255-6	10.1007/BF00939380	172	Earth and Planetary Sciences, Agricultural and Biological Sciences, Agricultural and Biological Sciences, Agricultural and Biological Sciences, Earth and Planetary Sciences, Earth and Planetary Sciences	Mathematics, Decision Sciences, Mathematics, Mathematics, Decision Sciences, Mathematics	River flow forecasting through conceptual models part I - A discussion of principles	Shuffled complex evolution approach for effective and efficient global minimization	Nash J.E., Sutcliffe J.V., Nash J.E., Sutcliffe J.V., Nash J.E., Sutcliffe J.V.	Duan Q.Y., Duan Q.Y., Sorooshian S., Sorooshian S., Gupta V.K., Gupta V.K.	0
276	10.1177/18.5.315	10.1038/227680a0	219	Medicine, Medicine	General, General	The unlabeled antibody enzyme method of immunohistochemistry: preparation and properties of soluble antigen-antibody complex (horseradish peroxidase-antihorseradish peroxidase) and its use in identification of spirochetes.	Cleavage of structural proteins during the assembly of the head of bacteriophage T4	Sternberger L.A., Meyer H.G., Cuculis J.J., Hardy Jr. P.H.	Laemmli U.K., Laemmli U.K., Laemmli U.K., Laemmli U.K.	0
277	10.1016/0038-1098(70)90262-0	10.1088/0022-3719/13/10/012	190	Physics and Astronomy, Chemistry, Materials Science, Physics and Astronomy, Materials Science, Materials Science, Physics and Astronomy, Chemistry, Chemistry	Physics and Astronomy, Physics and Astronomy, Engineering, Physics and Astronomy, Physics and Astronomy, Physics and Astronomy, Engineering, Engineering, Physics and Astronomy	Dielectric hysteresis in single crystal BiFeO3	Temperature dependence of the crystal and magnetic structures of BiFeO 3	James W.J., Gerson R., Teague J.R., James W.J., Gerson R., Teague J.R., James W.J., Gerson R., Teague J.R., James W.J., Gerson R., Teague J.R.	Fischer P., Fischer P., Fischer P., Polomska M., Polomska M., Polomska M., Sosnowska I., Sosnowska I., Sosnowska I., Szymanski M., Szymanski M., Szymanski M.	1
278	10.1016/0038-1098(70)90262-0	10.1088/0022-3719/15/23/020	241	Physics and Astronomy, Physics and Astronomy, Materials Science, Materials Science, Chemistry, Chemistry	Physics and Astronomy, Physics and Astronomy, Physics and Astronomy, Physics and Astronomy, Physics and Astronomy, Physics and Astronomy	Dielectric hysteresis in single crystal BiFeO3	Spiral magnetic ordering in bismuth ferrite	James W.J., Gerson R., Teague J.R., James W.J., Gerson R., Teague J.R., James W.J., Gerson R., Teague J.R.	Sosnowska I., Sosnowska I., Sosnowska I., Steichele E., Steichele E., Steichele E., Neumaier T.P., Neumaier T.P., Neumaier T.P.	1
279		10.1016/0038-1098(81)90686-4	234	Chemistry, Chemistry, Chemistry, Physics and Astronomy, Physics and Astronomy, Physics and Astronomy	Chemistry, Materials Science, Physics and Astronomy, Chemistry, Materials Science, Physics and Astronomy	RAMAN SPECTRUM OF GRAPHITE	Observation of Raman band shifting with excitation wavelength for carbons and graphites	KOENIG JL, TUINSTRA F, KOENIG JL, TUINSTRA F, KOENIG JL, TUINSTRA F, KOENIG JL, TUINSTRA F	Willis L.J., Willis L.J., Loehr T.M., Loehr T.M., Fischbach D.B., Fischbach D.B., Vidano R.P., Vidano R.P.	1
280	10.1038/227520a0	10.1111/j.1469-1809.1957.tb01874.x	270	General, General, General	Biochemistry, Genetics and Molecular Biology, Medicine, Medicine	Selection and covariance	Extension of covariance selection mathematics	Price G.R.	PRICE G.R.	1
281			404	Medicine, Medicine, Medicine, Medicine	Medicine, Medicine, Medicine, Medicine	Displaced proximal humeral fractures. II. Treatment of three-part and four-part displacement.	Displaced proximal humeral fractures. I. Classification and evaluation.	Neer 2nd. C.S.	Neer 2nd. C.S.	0
282	10.1109/TIM.1970.4313932	10.1109/PROC.1974.9382	772	Physics and Astronomy, Engineering	Engineering, Engineering	Measurement of the Intrinsic Properties Of Materials by Time-Domain Techniques	Automatic Measurement of Complex Dielectric Constant and Permeability at Microwave Frequencies	Ross G.F., Nicolson A.M.	Weir W.B., Weir W.B.	1
283			285	Engineering, Engineering, Engineering, Engineering	Energy, Engineering, Engineering, Engineering	CORRELATIONS FOR DESIGN OF LATERALLY LOADED PILES IN SOFT CLAY	Analysis of laterally loaded piles in sand	MATLOCK H, MATLOCK H, MATLOCK H	Reese L.C., Koop F.D., Cox W.R.	0
284			209	Medicine	Medicine	Preliminary pharmacologic and clinical evaluation of camptothecin sodium (NSC-100880).	Phase I clinical trial of weekly and daily treatment with camptothecin (NSC-100880): correlation with preclinical studies.	Oliverio V.T., Guarino A.M., Gottlieb J.A., Call J.B., Block J.B., Oliverio V.T., Guarino A.M., Gottlieb J.A., Call J.B., Block J.B., Oliverio V.T., Guarino A.M., Gottlieb J.A., Call J.B., Block J.B., Oliverio V.T., Guarino A.M., Gottlieb J.A., Call J.B., Block J.B., Oliverio V.T., Guarino A.M., Gottlieb J.A., Call J.B., Block J.B.	Creaven P.J., Creaven P.J., Creaven P.J., Creaven P.J., Creaven P.J., Selawry O.S., Selawry O.S., Selawry O.S., Selawry O.S., Selawry O.S., Cohen M.H., Cohen M.H., Cohen M.H., Cohen M.H., Cohen M.H., Muggia F.M., Muggia F.M., Muggia F.M., Muggia F.M., Muggia F.M., Hansen H.H., Hansen H.H., Hansen H.H., Hansen H.H., Hansen H.H.	0
285			188	Medicine, Medicine, Medicine	Medicine, Medicine, Health Professions	Perceived exertion as an indicator of somatic stress.	Psychophysical bases of perceived exertion	Borg G.	Borg G.A.V.	0
286	10.1016/0022-5193(70)90109-8	10.1177/016173468400600107	285	Agricultural and Biological Sciences, Biochemistry, Genetics and Molecular Biology, Biochemistry, Genetics and Molecular Biology, Immunology and Microbiology, Immunology and Microbiology, Mathematics, Mathematics, Mathematics, Mathematics, Mathematics, Mathematics, Agricultural and Biological Sciences	Medicine, Medicine, Health Professions, Medicine, Health Professions, Medicine, Health Professions, Medicine, Health Professions, Medicine, Health Professions, Health Professions	Algebraic Reconstruction Techniques (ART) for three-dimensional electron microscopy and X-ray photography	Simultaneous algebraic reconstruction technique (SART): A superior implementation of the art algorithm	Bender R., Herman G.T., Gordon R., Bender R., Herman G.T., Gordon R.	Kak A.C., Kak A.C., Kak A.C., Andersen A.H., Andersen A.H., Andersen A.H.	1
287		10.1103/PhysRevD.6.3368	303	Physics and Astronomy, Physics and Astronomy	Physics and Astronomy, Physics and Astronomy	LINEARIZED GRAVITATION THEORY AND THE GRAVITON MASS	Can gravitation have a finite range?	ZAKHAROV VI, ZAKHAROV VI	Deser S., Boulware D.G.	1
288		10.1016/0370-2693(72)90147-5	363	Physics and Astronomy	Physics and Astronomy	LINEARIZED GRAVITATION THEORY AND THE GRAVITON MASS	To the problem of nonvanishing gravitation mass	ZAKHAROV VI	Vainshtein A.I.	0
289	10.1038/226177a0	10.3758/BF03212183	108	General, General, General	Psychology, Psychology, Neuroscience	Interaction effects in parafoveal letter recognition	Contrast thresholds for identification of numeric characters in direct and eccentric view	Bouma H., Bouma H., Bouma H.	Rentschler I., Strasburger H., Harvey L.O.	1
290	10.1038/227680a0	10.1016/0003-2697(71)90370-8	697	General, General, General, General	Biochemistry, Genetics and Molecular Biology, Biochemistry, Genetics and Molecular Biology, Biochemistry, Genetics and Molecular Biology, Biochemistry, Genetics and Molecular Biology	Cleavage of structural proteins during the assembly of the head of bacteriophage T4	Superoxide dismutase: Improved assays and an assay applicable to acrylamide gels	Laemmli U.K., Laemmli U.K.	Beauchamp C., Fridovich I.	0
291	10.1038/227680a0	10.1016/S0074-7696(08)62312-8	158	General, General	Biochemistry, Genetics and Molecular Biology, Medicine	Cleavage of structural proteins during the assembly of the head of bacteriophage T4	Cell Death: The Significance of Apoptosis	Laemmli U.K., Laemmli U.K., Laemmli U.K.	Currie A.R., Kerr J.F.R., Wyllie A.H.	0
292	10.1038/227680a0	10.1016/0003-2697(82)90118-X	178	General, General, General, General	Biochemistry, Genetics and Molecular Biology, Biochemistry, Genetics and Molecular Biology, Biochemistry, Genetics and Molecular Biology, Biochemistry, Genetics and Molecular Biology	Cleavage of structural proteins during the assembly of the head of bacteriophage T4	Analysis of nitrate, nitrite, and [15N]nitrate in biological fluids	Laemmli U.K., Laemmli U.K., Laemmli U.K., Laemmli U.K., Laemmli U.K., Laemmli U.K.	Glogowski J., Skipper P.L., Wishnok J.S., Tannenbaum S.R., Wagner D.A., Green L.C.	0
293	10.1038/227680a0	10.1271/bbb1961.35.1154	218	General, General	Agricultural and Biological Sciences, Biochemistry, Genetics and Molecular Biology	Cleavage of structural proteins during the assembly of the head of bacteriophage T4	A Simple Activity Measurement of Lysozyme	Laemmli U.K., Laemmli U.K.	Imoto T., Yagishita K.	0
294	10.1038/227680a0	10.1021/jf60217a041	328	General, General	Agricultural and Biological Sciences, Chemistry	Cleavage of structural proteins during the assembly of the head of bacteriophage T4	Emulsifying Properties of Proteins: Evaluation of a Turbidimetric Technique	Laemmli U.K., Laemmli U.K.	Kinsella J.E., Pearce K.N.	0
295	10.1177/002199837100500106	10.1115/1.3153664	419	Materials Science, Materials Science, Materials Science, Engineering, Engineering, Materials Science, Materials Science, Engineering, Engineering, Engineering, Engineering, Materials Science	Engineering, Engineering, Engineering, Engineering, Engineering, Physics and Astronomy, Engineering, Engineering, Physics and Astronomy, Physics and Astronomy, Engineering, Physics and Astronomy	A General Theory of Strength for Anisotropic Materials	Failure criteria for unidirectional fiber composites	wu E.M., Tsai S.W.	Hashin Z., Hashin Z.	1
296	10.1037/h0030377	10.1037/h0077714	108	Psychology, Social Sciences, Social Sciences, Psychology	Psychology, Psychology, Social Sciences, Social Sciences	Constants across cultures in the face and emotion	A circumplex model of affect	Ekman P., Friesen W.V.	Russell J.A., Russell J.A.	0
297	10.1016/0028-3932(71)90067-4	10.3758/BF03203267	142	Psychology, Neuroscience, Neuroscience, Neuroscience, Neuroscience, Neuroscience, Psychology, Psychology, Neuroscience	Psychology, Psychology, Psychology, Psychology, Psychology, Neuroscience, Neuroscience, Psychology, Neuroscience	The assessment and analysis of handedness: The Edinburgh inventory	Effects of noise letters upon the identification of a target letter in a nonsearch task	Oldfield R.C., Oldfield R.C.	Eriksen C.W., Eriksen B.A.	0
298	10.1016/0028-3932(71)90067-4	10.1016/0022-3956(75)90026-6	827	Neuroscience, Psychology, Psychology, Neuroscience, Neuroscience, Neuroscience	Medicine, Neuroscience, Medicine, Neuroscience, Neuroscience, Medicine	The assessment and analysis of handedness: The Edinburgh inventory	""Mini-mental state"". A practical method for grading the cognitive state of patients for the clinician	Oldfield R.C., Oldfield R.C., Oldfield R.C.	Folstein M.F., Folstein S.E., McHugh P.R.	0
299	10.1016/0028-3932(71)90067-4	10.1126/science.7350657	401	Psychology, Neuroscience, Neuroscience	General, General, General	The assessment and analysis of handedness: The Edinburgh inventory	Reading senseless sentences: Brain potentials reflect semantic incongruity	Oldfield R.C., Oldfield R.C.	Kutas M., Hillyard S.A.	0
300	10.1016/0028-3932(71)90067-4	10.1016/0013-4694(83)90135-9	325	Psychology, Neuroscience, Neuroscience, Neuroscience, Neuroscience, Psychology	Neuroscience, Medicine, Neuroscience, Medicine, Neuroscience, Medicine	The assessment and analysis of handedness: The Edinburgh inventory	A new method for off-line removal of ocular artifact	Oldfield R.C., Oldfield R.C., Oldfield R.C.	Coles M.G.H., Donchin E., Gratton G.	0
301	10.1016/0032-3861(71)90041-3	10.1016/0032-3861(78)90060-5	542	Materials Science, Chemistry, Chemistry, Materials Science, Materials Science, Materials Science	Chemistry, Materials Science, Chemistry, Materials Science, Chemistry, Materials Science	Kinetics of non-isothermal crystallization	Parameters characterizing the kinetics of the non-isothermal crystallization of poly(ethylene terephthalate) determined by d.s.c.	Ozawa T.	Jeziorny A.	0
302	10.1109/TAP.1971.1139935	10.1109/TAP.1971.1139990	139	Physics and Astronomy, Physics and Astronomy, Physics and Astronomy, Engineering, Engineering, Engineering, Computer Science, Computer Science, Computer Science	Engineering, Physics and Astronomy, Computer Science, Physics and Astronomy, Engineering, Computer Science, Physics and Astronomy, Engineering, Computer Science	A Generalized Expansion for Radiated and Scattered Fields	Computation of Characteristic Modes for Conducting Bodies	Turpin R.H., Garbacz R.J., Turpin R.H., Garbacz R.J.	Harrington R.F., Harrington R.F., Mautz J.R., Mautz J.R.	0
303	10.1109/TAP.1971.1139935	10.1109/TAP.1971.1139999	192	Engineering, Computer Science, Computer Science, Engineering, Physics and Astronomy, Physics and Astronomy	Engineering, Engineering, Physics and Astronomy, Physics and Astronomy, Physics and Astronomy, Engineering	A Generalized Expansion for Radiated and Scattered Fields	Theory of Characteristic Modes for Conducting Bodies	Turpin R.H., Garbacz R.J., Turpin R.H., Garbacz R.J.	Harrington R.F., Harrington R.F., Mautz J.R., Mautz J.R.	1
304	10.1152/jn.1971.34.3.337	10.1126/science.173.3997.652	279	Biochemistry, Genetics and Molecular Biology, Neuroscience	General, General	Prefrontal cortical unit activity and delayed alternation performance in monkeys.	Neuron activity related to short-term memory	Niki H., Kubota K., Niki H., Kubota K.	Fuster J.M., Fuster J.M., Alexander G.E., Alexander G.E.	0
305	10.1176/ajp.127.12.1653		295	Medicine	Medicine	The Michigan alcoholism screening test: the quest for a new diagnostic instrument.	The CAGE questionnaire: validation of a new alcoholism screening instrument	Selzer M.L., Selzer M.L., Selzer M.L.	McLeod G., Mayfield D., Hall P.	0
306	10.1109/TCT.1971.1083337	10.1109/PROC.1976.10092	965	Engineering	Engineering	Memristor—The Missing Circuit Element	Memristive Devices and Systems	Chua L.O., Chua L.O.	Kang S.M., Chua L.O.	1
307		10.1061/(ASCE)0733-9410(1983)109:3(458)	226	Engineering, Engineering, Engineering	Environmental Science, Earth and Planetary Sciences, Earth and Planetary Sciences	Simplified procedure for evaluating soil liquefaction potential	Evaluation of liquefaction potential using field performance data	IDRISS IM, SEED HB, IDRISS IM, SEED HB, IDRISS IM, SEED HB	Seed H.B., Seed H.B., Arango I., Arango I., Idriss I.M., Idriss I.M.	1
308	10.1148/101.1.101		237	Medicine, Medicine	Medicine, Medicine	Patella position in the normal knee joint.	A new method of measuring patellar height	Insall J., Salvati E., Insall J., Salvati E.	Blackburn J.S., Blackburn J.S., Peel T.E., Peel T.E.	0
309	10.1016/0003-2697(71)90375-7	10.1016/0003-2697(71)90370-8	234	Biochemistry, Genetics and Molecular Biology, Biochemistry, Genetics and Molecular Biology, Biochemistry, Genetics and Molecular Biology, Biochemistry, Genetics and Molecular Biology, Biochemistry, Genetics and Molecular Biology, Biochemistry, Genetics and Molecular Biology, Biochemistry, Genetics and Molecular Biology, Biochemistry, Genetics and Molecular Biology, Biochemistry, Genetics and Mole…	Biochemistry, Genetics and Molecular Biology, Biochemistry, Genetics and Molecular Biology, Biochemistry, Genetics and Molecular Biology, Biochemistry, Genetics and Molecular Biology, Biochemistry, Genetics and Molecular Biology, Biochemistry, Genetics and Molecular Biology, Biochemistry, Genetics and Molecular Biology, Biochemistry, Genetics and Molecular Biology, Biochemistry, Genetics and Mole…	An improved procedure using ferricyanide for detecting catalase isozymes	Superoxide dismutase: Improved assays and an assay applicable to acrylamide gels	Spencer A.K., Stahmann M.A., Woodbury W., Spencer A.K., Stahmann M.A., Woodbury W.	Fridovich I., Fridovich I., Fridovich I., Beauchamp C., Beauchamp C., Beauchamp C.	0
310	10.1016/0003-2697(71)90375-7	10.1016/0003-2697(76)90527-3	229	Biochemistry, Genetics and Molecular Biology, Biochemistry, Genetics and Molecular Biology, Biochemistry, Genetics and Molecular Biology, Biochemistry, Genetics and Molecular Biology, Biochemistry, Genetics and Molecular Biology, Biochemistry, Genetics and Molecular Biology, Biochemistry, Genetics and Molecular Biology, Biochemistry, Genetics and Molecular Biology, Biochemistry, Genetics and Mole…	Biochemistry, Genetics and Molecular Biology, Biochemistry, Genetics and Molecular Biology, Biochemistry, Genetics and Molecular Biology, Biochemistry, Genetics and Molecular Biology, Biochemistry, Genetics and Molecular Biology, Biochemistry, Genetics and Molecular Biology, Biochemistry, Genetics and Molecular Biology, Biochemistry, Genetics and Molecular Biology, Biochemistry, Genetics and Mole…	An improved procedure using ferricyanide for detecting catalase isozymes	A rapid and sensitive method for the quantitation of microgram quantities of protein utilizing the principle of protein-dye binding	Spencer A.K., Stahmann M.A., Woodbury W.	Bradford M.M., Bradford M.M., Bradford M.M.	0
311	10.1016/0003-2697(71)90370-8	10.1159/000136485	137	Biochemistry, Genetics and Molecular Biology, Biochemistry, Genetics and Molecular Biology, Biochemistry, Genetics and Molecular Biology, Biochemistry, Genetics and Molecular Biology	Pharmacology, Toxicology and Pharmaceutics, Pharmacology, Toxicology and Pharmaceutics, Pharmacology, Toxicology and Pharmaceutics, Pharmacology, Toxicology and Pharmaceutics	Superoxide dismutase: Improved assays and an assay applicable to acrylamide gels	Bromobenzene-induced liver necrosis. Protective role of glutathione and evidence for 3,4-bromobenzene oxide as the hepatotoxic metabolite	Fridovich I., Beauchamp C., Fridovich I., Beauchamp C., Fridovich I., Beauchamp C., Fridovich I., Beauchamp C.	Jollow D., Jollow D., Gillette J.R., Gillette J.R., Zampaglione N., Zampaglione N., Mitchell J.R., Mitchell J.R.	0
312	10.1016/0003-2697(71)90370-8		266	Biochemistry, Genetics and Molecular Biology, Biochemistry, Genetics and Molecular Biology, Biochemistry, Genetics and Molecular Biology, Biochemistry, Genetics and Molecular Biology, Biochemistry, Genetics and Molecular Biology, Biochemistry, Genetics and Molecular Biology, Biochemistry, Genetics and Molecular Biology, Biochemistry, Genetics and Molecular Biology, Biochemistry, Genetics and Mole…	Biochemistry, Genetics and Molecular Biology, Biochemistry, Genetics and Molecular Biology, Biochemistry, Genetics and Molecular Biology, Biochemistry, Genetics and Molecular Biology, Biochemistry, Genetics and Molecular Biology, Biochemistry, Genetics and Molecular Biology, Biochemistry, Genetics and Molecular Biology, Biochemistry, Genetics and Molecular Biology, Biochemistry, Genetics and Mole…	Superoxide dismutase: Improved assays and an assay applicable to acrylamide gels	Glutathione S transferases. The first enzymatic step in mercapturic acid formation	Fridovich I., Beauchamp C., Fridovich I., Beauchamp C., Fridovich I., Beauchamp C.	Jakoby W.B., Jakoby W.B., Pabst M.J., Pabst M.J., Habig W.H., Habig W.H.	0
313	10.1016/0003-2697(71)90370-8	10.1016/S0076-6879(78)52032-6	212	Biochemistry, Genetics and Molecular Biology, Biochemistry, Genetics and Molecular Biology, Biochemistry, Genetics and Molecular Biology, Biochemistry, Genetics and Molecular Biology, Biochemistry, Genetics and Molecular Biology, Biochemistry, Genetics and Molecular Biology, Biochemistry, Genetics and Molecular Biology, Biochemistry, Genetics and Molecular Biology	Biochemistry, Genetics and Molecular Biology, Biochemistry, Genetics and Molecular Biology, Biochemistry, Genetics and Molecular Biology, Biochemistry, Genetics and Molecular Biology, Biochemistry, Genetics and Molecular Biology, Biochemistry, Genetics and Molecular Biology, Biochemistry, Genetics and Molecular Biology, Biochemistry, Genetics and Molecular Biology	Superoxide dismutase: Improved assays and an assay applicable to acrylamide gels	Microsomal Lipid Peroxidation	Fridovich I., Beauchamp C., Fridovich I., Beauchamp C.	Aust S.D., Aust S.D., Buege J.A., Buege J.A.	0
314	10.1016/0003-2697(71)90370-8	10.1016/0003-2697(79)90738-3	350	Biochemistry, Genetics and Molecular Biology, Biochemistry, Genetics and Molecular Biology, Biochemistry, Genetics and Molecular Biology, Biochemistry, Genetics and Molecular Biology, Biochemistry, Genetics and Molecular Biology, Biochemistry, Genetics and Molecular Biology, Biochemistry, Genetics and Molecular Biology, Biochemistry, Genetics and Molecular Biology, Biochemistry, Genetics and Mole…	Biochemistry, Genetics and Molecular Biology, Biochemistry, Genetics and Molecular Biology, Biochemistry, Genetics and Molecular Biology, Biochemistry, Genetics and Molecular Biology, Biochemistry, Genetics and Molecular Biology, Biochemistry, Genetics and Molecular Biology, Biochemistry, Genetics and Molecular Biology, Biochemistry, Genetics and Molecular Biology, Biochemistry, Genetics and Mole…	Superoxide dismutase: Improved assays and an assay applicable to acrylamide gels	Assay for lipid peroxides in animal tissues by thiobarbituric acid reaction	Fridovich I., Beauchamp C., Fridovich I., Beauchamp C., Fridovich I., Beauchamp C.	Yagi K., Yagi K., Ohishi N., Ohishi N., Ohkawa H., Ohkawa H.	0
315	10.1016/0003-2697(71)90370-8	10.1016/S0076-6879(84)05015-1	211	Biochemistry, Genetics and Molecular Biology, Biochemistry, Genetics and Molecular Biology, Biochemistry, Genetics and Molecular Biology, Biochemistry, Genetics and Molecular Biology, Biochemistry, Genetics and Molecular Biology, Biochemistry, Genetics and Molecular Biology, Biochemistry, Genetics and Molecular Biology, Biochemistry, Genetics and Molecular Biology	Biochemistry, Genetics and Molecular Biology, Biochemistry, Genetics and Molecular Biology, Biochemistry, Genetics and Molecular Biology, Biochemistry, Genetics and Molecular Biology, Biochemistry, Genetics and Molecular Biology, Biochemistry, Genetics and Molecular Biology, Biochemistry, Genetics and Molecular Biology, Biochemistry, Genetics and Molecular Biology	Superoxide dismutase: Improved assays and an assay applicable to acrylamide gels	[12] Assays of Glutathione Peroxidase	Fridovich I., Beauchamp C., Fridovich I., Beauchamp C.	Flohe L., Flohe L., Gunzler W.A., Gunzler W.A.	0
316	10.1016/0003-2697(71)90370-8	10.1016/0076-6879(90)86135-I	142	Biochemistry, Genetics and Molecular Biology, Biochemistry, Genetics and Molecular Biology, Biochemistry, Genetics and Molecular Biology, Biochemistry, Genetics and Molecular Biology, Biochemistry, Genetics and Molecular Biology, Biochemistry, Genetics and Molecular Biology, Biochemistry, Genetics and Molecular Biology, Biochemistry, Genetics and Molecular Biology	Biochemistry, Genetics and Molecular Biology, Biochemistry, Genetics and Molecular Biology, Biochemistry, Genetics and Molecular Biology, Biochemistry, Genetics and Molecular Biology, Biochemistry, Genetics and Molecular Biology, Biochemistry, Genetics and Molecular Biology, Biochemistry, Genetics and Molecular Biology, Biochemistry, Genetics and Molecular Biology	Superoxide dismutase: Improved assays and an assay applicable to acrylamide gels	Malondialdehyde determination as index of lipid Peroxidation	Fridovich I., Beauchamp C., Fridovich I., Beauchamp C.	Hadley M., Hadley M., Draper H.H., Draper H.H.	0
317	10.1016/0003-2697(71)90370-8	10.1016/0076-6879(87)48036-1	177	Biochemistry, Genetics and Molecular Biology, Biochemistry, Genetics and Molecular Biology, Biochemistry, Genetics and Molecular Biology, Biochemistry, Genetics and Molecular Biology, Biochemistry, Genetics and Molecular Biology, Biochemistry, Genetics and Molecular Biology, Biochemistry, Genetics and Molecular Biology, Biochemistry, Genetics and Molecular Biology	Biochemistry, Genetics and Molecular Biology, Biochemistry, Genetics and Molecular Biology, Biochemistry, Genetics and Molecular Biology, Biochemistry, Genetics and Molecular Biology, Biochemistry, Genetics and Molecular Biology, Biochemistry, Genetics and Molecular Biology, Biochemistry, Genetics and Molecular Biology, Biochemistry, Genetics and Molecular Biology	Superoxide dismutase: Improved assays and an assay applicable to acrylamide gels	Chlorophylls and Carotenoids: Pigments of Photosynthetic Biomembranes	Fridovich I., Beauchamp C.	Lichtenthaler H.K., Lichtenthaler H.K.	0
318	10.1016/0045-7949(71)90031-9	10.2514/3.60497	292	Computer Science, Materials Science, Mathematics, Engineering, Engineering	Engineering, Engineering, Engineering, Engineering, Engineering	A hybrid method of component mode synthesis	Improved component-mode representation for structural dynamic analysis	MacNeal R.H.	Rubin S.	1
319	10.1038/sj.bdj.4802708	10.1016/0022-3913(89)90170-4	156	Dentistry, Dentistry, Medicine, Medicine	Dentistry, Dentistry, Dentistry, Dentistry	The estimation of cement film thickness by an in vivo technique	Considerations in measurement of marginal fit	Von F., McLean J.W., Von F., McLean J.W., Von F., McLean J.W., Von F., McLean J.W.	Holmes J.R., Holmes J.R., Sulik W.D., Sulik W.D., Holland G.A., Holland G.A., Bayne S.C., Bayne S.C.	0
320	10.1021/bi00793a015	10.1021/bi00514a017	208	Biochemistry, Genetics and Molecular Biology	Biochemistry, Genetics and Molecular Biology	Solute Perturbation of Protein Fluorescence. the Quenching of the Tryptophyl Fluorescence of Model Compounds and of Lysozyme by Iodide Ion	Thermodynamics of Protein Association Reactions: Forces Contributing to Stability	Lehrer S.S., Lehrer S.S.	Ross P.D., Subramanian S.	0
321	10.1126/science.171.3972.701	10.3758/BF03204234	115	General, General, General	Psychology, Psychology, Neuroscience	Mental rotation of three-dimensional objects	Demonstration of a mental analog of an external rotation	Shepard R.N., Metzler J.	Cooper L.A., Cooper L.A.	1
322	10.1126/science.171.3972.701	10.2466/pms.1978.47.2.599	393	General, General	Psychology, Neuroscience	Mental rotation of three-dimensional objects	Mental rotations, a group test of three-dimensional spatial visualization	Shepard R.N., Metzler J., Shepard R.N., Metzler J.	Vandenberg S.G., Vandenberg S.G., Kuse A.R., Kuse A.R.	0
323	10.1038/230241a0	10.1016/0016-7037(81)90244-1	164	General	Earth and Planetary Sciences	New method of collagen extraction for radiocarbon dating	Influence of diet on the distribution of nitrogen isotopes in animals	Longin R., Longin R.	Deniro M.J., Epstein S.	0
324	10.1038/230241a0	10.1016/0305-4403(90)90007-R	224	General, General	Social Sciences, Arts and Humanities	New method of collagen extraction for radiocarbon dating	Preparation and characterization of bone and tooth collagen for isotopic analysis	Longin R.	Ambrose S.H.	1
325	10.1902/jop.1972.43.1.38		275	Dentistry	Dentistry	The plaque control record.	Problems and proposals for recording gingivitis and plaque.	O'Leary T.J., Naylor J.E., Drake R.B., O'Leary T.J., Naylor J.E., Drake R.B.	Bay I., Bay I., Bay I., Ainamo J., Ainamo J., Ainamo J.	0
326	10.1145/361237.361242		195	Computer Science, Computer Science, Computer Science, Mathematics, Computer Science, Computer Science	Engineering, Engineering, Engineering, Engineering, Engineering, Engineering	Use of the Hough Transformation to Detect Lines and Curves in Pictures	THRESHOLD SELECTION METHOD FROM GRAY-LEVEL HISTOGRAMS.	Hart P.E., Duda R.O.	Otsu Nobuyuki, Otsu Nobuyuki	0
327	10.1145/361237.361242	10.1145/358669.358692	221	Computer Science, Computer Science, Computer Science, Computer Science, Computer Science, Computer Science, Computer Science, Computer Science, Computer Science, Computer Science, Computer Science, Computer Science, Computer Science, Computer Science, Computer Science, Computer Science, Computer Science, Computer Science, Computer Science, Computer Science, Computer Science, Computer Science, Com…	Mathematics, Computer Science, Computer Science, Mathematics, Computer Science, Computer Science, Computer Science, Computer Science, Computer Science, Mathematics, Computer Science, Computer Science, Computer Science, Computer Science, Computer Science, Computer Science, Computer Science, Computer Science, Mathematics, Computer Science, Computer Science, Computer Science, Computer Science, Mathe…	Use of the Hough Transformation to Detect Lines and Curves in Pictures	Random sample consensus: A Paradigm for Model Fitting with Applications to Image Analysis and Automated Cartography	Hart P.E., Duda R.O., Hart P.E., Duda R.O.	Bolles R.C., Bolles R.C., Fischler M.A., Fischler M.A.	0
328			221	Medicine	Medicine	Phase II study of camptothecin (NSC-100880) in the treatment of advanced gastrointestinal cancer.	Phase I clinical trial of weekly and daily treatment with camptothecin (NSC-100880): correlation with preclinical studies.	Hahn R.G., Reitemeier R.J., Moertel C.G., Schutt A.J., Hahn R.G., Reitemeier R.J., Moertel C.G., Schutt A.J., Hahn R.G., Reitemeier R.J., Moertel C.G., Schutt A.J., Hahn R.G., Reitemeier R.J., Moertel C.G., Schutt A.J., Hahn R.G., Reitemeier R.J., Moertel C.G., Schutt A.J.	Creaven P.J., Creaven P.J., Creaven P.J., Creaven P.J., Selawry O.S., Selawry O.S., Selawry O.S., Selawry O.S., Cohen M.H., Cohen M.H., Cohen M.H., Cohen M.H., Hansen H.H., Hansen H.H., Hansen H.H., Hansen H.H., Muggia F.M., Muggia F.M., Muggia F.M., Muggia F.M.	0
329			416			The prediction of laminarization with a two-equation model of turbulence	Application of the energy-dissipation model of turbulence to the calculation of flow near a spinning disc	Launder B.E., Jones W.P., Launder B.E., Jones W.P.	Launder B.E., Launder B.E., Sharma B.I., Sharma B.I.	1
330	10.1016/0020-7225(72)90039-0	10.1063/1.332803	596	Engineering	Physics and Astronomy	On nonlocal elasticity	On differential equations of nonlocal elasticity and solutions of screw dislocation and surface waves	Eringen A.C., Edelen D.G.B.	Eringen A.C., Eringen A.C.	0
331	10.1111/j.1532-5415.1972.tb00787.x	10.1016/0531-5565(80)90010-8	207	Medicine, Medicine, Medicine, Medicine, Medicine, Medicine	Biochemistry, Genetics and Molecular Biology, Biochemistry, Genetics and Molecular Biology, Biochemistry, Genetics and Molecular Biology, Biochemistry, Genetics and Molecular Biology, Biochemistry, Genetics and Molecular Biology, Biochemistry, Genetics and Molecular Biology	The Biologic Clock: The Mitochondria?	Mitochondrial role in cell aging	HARMAN D., HARMAN D., HARMAN D., HARMAN D.	Miquel J., Johnson Jr. J.E., Fleming J., Economos A.C.	1
332		10.1364/JOSA.73.001434	177	Engineering, Materials Science, Physics and Astronomy	Engineering, Engineering, Engineering	PRACTICAL ALGORITHM FOR THE DETERMINATION OF PHASE FROM IMAGE AND DIFFRACTION PLANE PICTURES.	DETERMINISTIC PHASE RETRIEVAL: A GREEN'S FUNCTION SOLUTION.	Saxton W.O., Gerchberg R.W.	Teague Michael Reed, Teague Michael Reed	0
333			625	Biochemistry, Genetics and Molecular Biology, Medicine, Medicine, Biochemistry, Genetics and Molecular Biology	Biochemistry, Genetics and Molecular Biology, Medicine, Biochemistry, Genetics and Molecular Biology, Medicine	Estimation of the concentration of low-density lipoprotein cholesterol in plasma, without use of the preparative ultracentrifuge.	Quantitative determination of serum triglycerides by the use of enzymes	Friedewald W.T., Fredrickson D.S., Levy R.I., Friedewald W.T., Fredrickson D.S., Levy R.I.	David H., David H., David H., Bucolo G., Bucolo G., Bucolo G.	0
334		10.1016/0003-2697(79)90738-3	287	Medicine, Biochemistry, Genetics and Molecular Biology, Biochemistry, Genetics and Molecular Biology, Biochemistry, Genetics and Molecular Biology, Biochemistry, Genetics and Molecular Biology, Medicine, Medicine, Medicine	Biochemistry, Genetics and Molecular Biology, Biochemistry, Genetics and Molecular Biology, Biochemistry, Genetics and Molecular Biology, Biochemistry, Genetics and Molecular Biology, Biochemistry, Genetics and Molecular Biology, Biochemistry, Genetics and Molecular Biology, Biochemistry, Genetics and Molecular Biology, Biochemistry, Genetics and Molecular Biology	Estimation of the concentration of low-density lipoprotein cholesterol in plasma, without use of the preparative ultracentrifuge.	Assay for lipid peroxides in animal tissues by thiobarbituric acid reaction	Friedewald W.T., Fredrickson D.S., Levy R.I., Friedewald W.T., Fredrickson D.S., Levy R.I., Friedewald W.T., Fredrickson D.S., Levy R.I.	Ohkawa H., Ohkawa H., Ohkawa H., Ohishi N., Ohishi N., Ohishi N., Yagi K., Yagi K., Yagi K.	0
335			494	Medicine, Biochemistry, Genetics and Molecular Biology	Biochemistry, Genetics and Molecular Biology, Biochemistry, Genetics and Molecular Biology	Estimation of the concentration of low-density lipoprotein cholesterol in plasma, without use of the preparative ultracentrifuge.	Serum triglycerides determined colorimetrically with an enzyme that produces hydrogen peroxide	Friedewald W.T., Fredrickson D.S., Levy R.I., Friedewald W.T., Fredrickson D.S., Levy R.I.	Prencipe L., Prencipe L., Prencipe L., Fossati P., Fossati P., Fossati P.	0
336		10.1007/BF00280883	1865	Medicine, Medicine, Biochemistry, Genetics and Molecular Biology, Biochemistry, Genetics and Molecular Biology	Medicine, Medicine, Medicine, Medicine	Estimation of the concentration of low-density lipoprotein cholesterol in plasma, without use of the preparative ultracentrifuge.	Homeostasis model assessment: insulin resistance and β-cell function from fasting plasma glucose and insulin concentrations in man	Friedewald W.T., Fredrickson D.S., Levy R.I., Friedewald W.T., Fredrickson D.S., Levy R.I., Friedewald W.T., Fredrickson D.S., Levy R.I., Friedewald W.T., Fredrickson D.S., Levy R.I., Friedewald W.T., Fredrickson D.S., Levy R.I., Friedewald W.T., Fredrickson D.S., Levy R.I.	Hosker J.P., Hosker J.P., Hosker J.P., Rudenski A.S., Rudenski A.S., Rudenski A.S., Treacher D.F., Treacher D.F., Treacher D.F., Naylor B.A., Naylor B.A., Naylor B.A., Turner R.C., Turner R.C., Turner R.C., Matthews D.R., Matthews D.R., Matthews D.R.	0
337	10.1016/0003-2697(72)90132-7		296	Biochemistry, Genetics and Molecular Biology, Biochemistry, Genetics and Molecular Biology, Biochemistry, Genetics and Molecular Biology	Biochemistry, Genetics and Molecular Biology, Biochemistry, Genetics and Molecular Biology, Biochemistry, Genetics and Molecular Biology	Colorimetric assay of catalase	The role of superoxide anion in the autoxidation of epinephrine and a simple assay for superoxide dismutase.	Sinha A.K., Sinha A.K.	Misra H.P., Fridovich I.	0
338	10.1016/0003-2697(72)90132-7	10.1126/science.179.4073.588	1271	Biochemistry, Genetics and Molecular Biology, Biochemistry, Genetics and Molecular Biology, Biochemistry, Genetics and Molecular Biology	General, General, General	Colorimetric assay of catalase	Selenium: Biochemical role as a component of glatathione peroxidase	Sinha A.K., Sinha A.K., Sinha A.K., Sinha A.K., Sinha A.K., Sinha A.K.	Hoekstra W.G., Hafeman D.G., Swanson A.B., Ganther H.E., Pope A.L., Rotruck J.T.	0
339	10.1016/0003-2697(72)90132-7	10.1111/j.1432-1033.1974.tb03714.x	551	Biochemistry, Genetics and Molecular Biology, Biochemistry, Genetics and Molecular Biology, Biochemistry, Genetics and Molecular Biology	Biochemistry, Genetics and Molecular Biology, Biochemistry, Genetics and Molecular Biology, Biochemistry, Genetics and Molecular Biology	Colorimetric assay of catalase	Involvement of the Superoxide Anion Radical in the Autoxidation of Pyrogallol and a Convenient Assay for Superoxide Dismutase	Sinha A.K., Sinha A.K.	MARKLUND G., MARKLUND S.	0
340	10.1016/0003-2697(72)90132-7		652	Biochemistry, Genetics and Molecular Biology, Biochemistry, Genetics and Molecular Biology, Biochemistry, Genetics and Molecular Biology, Biochemistry, Genetics and Molecular Biology, Biochemistry, Genetics and Molecular Biology, Biochemistry, Genetics and Molecular Biology, Biochemistry, Genetics and Molecular Biology, Biochemistry, Genetics and Molecular Biology, Biochemistry, Genetics and Mole…	Biochemistry, Genetics and Molecular Biology, Biochemistry, Genetics and Molecular Biology, Biochemistry, Genetics and Molecular Biology, Biochemistry, Genetics and Molecular Biology, Biochemistry, Genetics and Molecular Biology, Biochemistry, Genetics and Molecular Biology, Biochemistry, Genetics and Molecular Biology, Biochemistry, Genetics and Molecular Biology, Biochemistry, Genetics and Mole…	Colorimetric assay of catalase	Glutathione S transferases. The first enzymatic step in mercapturic acid formation	Sinha A.K., Sinha A.K., Sinha A.K.	Jakoby W.B., Pabst M.J., Habig W.H.	0
341	10.1016/0003-2697(72)90132-7	10.1016/0003-2697(76)90527-3	173	Biochemistry, Genetics and Molecular Biology, Biochemistry, Genetics and Molecular Biology, Biochemistry, Genetics and Molecular Biology, Biochemistry, Genetics and Molecular Biology, Biochemistry, Genetics and Molecular Biology, Biochemistry, Genetics and Molecular Biology, Biochemistry, Genetics and Molecular Biology, Biochemistry, Genetics and Molecular Biology, Biochemistry, Genetics and Mole…	Biochemistry, Genetics and Molecular Biology, Biochemistry, Genetics and Molecular Biology, Biochemistry, Genetics and Molecular Biology, Biochemistry, Genetics and Molecular Biology, Biochemistry, Genetics and Molecular Biology, Biochemistry, Genetics and Molecular Biology, Biochemistry, Genetics and Molecular Biology, Biochemistry, Genetics and Molecular Biology, Biochemistry, Genetics and Mole…	Colorimetric assay of catalase	A rapid and sensitive method for the quantitation of microgram quantities of protein utilizing the principle of protein-dye binding	Sinha A.K.	Bradford M.M.	0
342	10.1016/0003-2697(72)90132-7	10.1016/0304-4165(79)90289-7	472	Biochemistry, Genetics and Molecular Biology, Biochemistry, Genetics and Molecular Biology, Biochemistry, Genetics and Molecular Biology, Biochemistry, Genetics and Molecular Biology, Biochemistry, Genetics and Molecular Biology, Biochemistry, Genetics and Molecular Biology, Biochemistry, Genetics and Molecular Biology, Biochemistry, Genetics and Molecular Biology, Biochemistry, Genetics and Mole…	Biochemistry, Genetics and Molecular Biology, Biochemistry, Genetics and Molecular Biology, Biochemistry, Genetics and Molecular Biology, Biochemistry, Genetics and Molecular Biology, Biochemistry, Genetics and Molecular Biology, Biochemistry, Genetics and Molecular Biology, Biochemistry, Genetics and Molecular Biology, Biochemistry, Genetics and Molecular Biology, Biochemistry, Genetics and Mole…	Colorimetric assay of catalase	Levels of glutathione, glutathione reductase and glutathione S-transferase activities in rat lung and liver	Sinha A.K., Sinha A.K., Sinha A.K.	Moron M.S., Depierre J.W., Mannervik B.	0
343	10.1016/0003-2697(72)90132-7	10.1016/0076-6879(79)62181-X	406	Biochemistry, Genetics and Molecular Biology, Biochemistry, Genetics and Molecular Biology, Biochemistry, Genetics and Molecular Biology, Biochemistry, Genetics and Molecular Biology, Biochemistry, Genetics and Molecular Biology, Biochemistry, Genetics and Molecular Biology	Biochemistry, Genetics and Molecular Biology, Biochemistry, Genetics and Molecular Biology, Biochemistry, Genetics and Molecular Biology, Biochemistry, Genetics and Molecular Biology, Biochemistry, Genetics and Molecular Biology, Biochemistry, Genetics and Molecular Biology	Colorimetric assay of catalase	Selected methods for the determination of ascorbic acid in animal cells, tissues, and fluids	Sinha A.K., Sinha A.K., Sinha A.K.	Sauberlich H.E., David Turnbull J., Omaye S.T.	0
344	10.1016/0003-2697(72)90132-7	10.1016/S0076-6879(84)05019-9	271	Biochemistry, Genetics and Molecular Biology, Biochemistry, Genetics and Molecular Biology, Biochemistry, Genetics and Molecular Biology, Biochemistry, Genetics and Molecular Biology, Biochemistry, Genetics and Molecular Biology, Biochemistry, Genetics and Molecular Biology	Biochemistry, Genetics and Molecular Biology, Biochemistry, Genetics and Molecular Biology, Biochemistry, Genetics and Molecular Biology, Biochemistry, Genetics and Molecular Biology, Biochemistry, Genetics and Molecular Biology, Biochemistry, Genetics and Molecular Biology	Colorimetric assay of catalase	[16] Vitamin E Analysis Methods for Animal Tissues	Sinha A.K.	Desai I.D.	0
345	10.1016/0003-2697(72)90132-7		943	Biochemistry, Genetics and Molecular Biology, Biochemistry, Genetics and Molecular Biology, Biochemistry, Genetics and Molecular Biology, Biochemistry, Genetics and Molecular Biology, Biochemistry, Genetics and Molecular Biology, Biochemistry, Genetics and Molecular Biology	Biochemistry, Genetics and Molecular Biology, Biochemistry, Genetics and Molecular Biology, Biochemistry, Genetics and Molecular Biology, Biochemistry, Genetics and Molecular Biology, Biochemistry, Genetics and Molecular Biology, Biochemistry, Genetics and Molecular Biology	Colorimetric assay of catalase	A modified spectrophotometric assay of superoxide dismutase	Sinha A.K., Sinha A.K., Sinha A.K.	Viswanathan P.N., Kakkar P., Das B.	0
346	10.1016/0003-2697(72)90132-7	10.1016/0009-3084(87)90071-5	174	Biochemistry, Genetics and Molecular Biology, Biochemistry, Genetics and Molecular Biology, Biochemistry, Genetics and Molecular Biology, Biochemistry, Genetics and Molecular Biology, Biochemistry, Genetics and Molecular Biology, Biochemistry, Genetics and Molecular Biology, Biochemistry, Genetics and Molecular Biology, Biochemistry, Genetics and Molecular Biology, Biochemistry, Genetics and Mole…	Biochemistry, Genetics and Molecular Biology, Biochemistry, Genetics and Molecular Biology, Chemistry, Biochemistry, Genetics and Molecular Biology, Biochemistry, Genetics and Molecular Biology, Biochemistry, Genetics and Molecular Biology, Chemistry, Biochemistry, Genetics and Molecular Biology, Biochemistry, Genetics and Molecular Biology, Biochemistry, Genetics and Molecular Biology, Chemistry…	Colorimetric assay of catalase	Lipid peroxides and human diseases	Sinha A.K.	Yagi K.	0
347	10.1016/0014-4827(72)90558-7		364	Biochemistry, Genetics and Molecular Biology	Biochemistry, Genetics and Molecular Biology	A simple technique for demonstrating centromeric heterochromatin	Cytotaxonomic considerations on Hoplias lacerdae (Pisces, Erythrinidae)	Sumner A.T., Sumner A.T., Sumner A.T.	Takahashi C.S., Bertollo L.A.C., Moreira Filho O.	0
348		10.1007/BF01731581	276	Medicine, Medicine, Medicine, Medicine, Medicine, Medicine, Medicine, Medicine	Biochemistry, Genetics and Molecular Biology, Biochemistry, Genetics and Molecular Biology, Agricultural and Biological Sciences, Biochemistry, Genetics and Molecular Biology, Medicine, Agricultural and Biological Sciences, Agricultural and Biological Sciences, Biochemistry, Genetics and Molecular Biology	Peptidoglycan types of bacterial cell walls and their taxonomic implications.	A simple method for estimating evolutionary rates of base substitutions through comparative studies of nucleotide sequences	Kandler O., Schleifer K.H.	Kimura M., Kimura M.	0
349		10.1016/0167-7012(84)90018-6	284	Medicine, Medicine, Medicine	Medicine, Immunology and Microbiology, Biochemistry, Genetics and Molecular Biology	Peptidoglycan types of bacterial cell walls and their taxonomic implications.	An integrated procedure for the extraction of bacterial isoprenoid quinones and polar lipids	Kandler O., Schleifer K.H., Kandler O., Schleifer K.H., Kandler O., Schleifer K.H., Kandler O., Schleifer K.H., Kandler O., Schleifer K.H., Kandler O., Schleifer K.H., Kandler O., Schleifer K.H.	Athalye M., Athalye M., Goodfellow M., Goodfellow M., O'Donnell A.G., O'Donnell A.G., Minnikin D.E., Minnikin D.E., Schaal A., Schaal A., Parlett J.H., Parlett J.H., Alderson G., Alderson G.	0
350		10.1038/267673a0	216	Chemistry, Materials Science	General, General	ROLE OF IONIC DIFFUSION IN POLARIZATION IN VITREOUS IONIC CONDUCTORS.	The 'universal' dielectric response	Macedo P.B., Moynihan C.T., Bose R.	Jonscher A.K., Jonscher A.K., Jonscher A.K.	0
351	10.1007/BF00250512	10.1002/cpa.3160360506	248	Engineering, Engineering, Engineering, Engineering, Mathematics, Mathematics, Mathematics, Mathematics	Mathematics, Mathematics, Mathematics, Mathematics, Mathematics, Mathematics, Mathematics, Mathematics		Some mathematical questions related to the mhd equations	Lions J.L., Duvaut G., Lions J.L., Duvaut G.	Sermange M., Sermange M., Temam R., Temam R.	1
352	10.1038/newbio239197a0	10.1016/0022-5193(73)90198-7	517	Biochemistry, Genetics and Molecular Biology, Biochemistry, Genetics and Molecular Biology, Biochemistry, Genetics and Molecular Biology, Biochemistry, Genetics and Molecular Biology, Biochemistry, Genetics and Molecular Biology, Biochemistry, Genetics and Molecular Biology	Mathematics, Mathematics, Mathematics, Immunology and Microbiology, Agricultural and Biological Sciences, Biochemistry, Genetics and Molecular Biology	Origin of concatemeric T7 DNA	A theory of marginotomy. The incomplete copying of template margin in enzymic synthesis of polynucleotides and biological significance of the phenomenon	Watson J.D.	Olovnikov A.M.	0
353		10.1159/000136485	179	Biochemistry, Genetics and Molecular Biology	Pharmacology, Toxicology and Pharmaceutics	The role of superoxide anion in the autoxidation of epinephrine and a simple assay for superoxide dismutase.	Bromobenzene-induced liver necrosis. Protective role of glutathione and evidence for 3,4-bromobenzene oxide as the hepatotoxic metabolite	Misra H.P., Fridovich I., Misra H.P., Fridovich I., Misra H.P., Fridovich I., Misra H.P., Fridovich I.	Mitchell J.R., Mitchell J.R., Zampaglione N., Zampaglione N., Gillette J.R., Gillette J.R., Jollow D., Jollow D.	0
354			782	Biochemistry, Genetics and Molecular Biology, Biochemistry, Genetics and Molecular Biology, Biochemistry, Genetics and Molecular Biology	Biochemistry, Genetics and Molecular Biology, Biochemistry, Genetics and Molecular Biology, Biochemistry, Genetics and Molecular Biology	The role of superoxide anion in the autoxidation of epinephrine and a simple assay for superoxide dismutase.	Glutathione S transferases. The first enzymatic step in mercapturic acid formation	Misra H.P., Fridovich I., Misra H.P., Fridovich I., Misra H.P., Fridovich I.	Habig W.H., Habig W.H., Jakoby W.B., Jakoby W.B., Pabst M.J., Pabst M.J.	0
355		10.1016/S0076-6879(78)52032-6	349	Biochemistry, Genetics and Molecular Biology, Biochemistry, Genetics and Molecular Biology	Biochemistry, Genetics and Molecular Biology, Biochemistry, Genetics and Molecular Biology	The role of superoxide anion in the autoxidation of epinephrine and a simple assay for superoxide dismutase.	Microsomal Lipid Peroxidation	Misra H.P., Fridovich I., Misra H.P., Fridovich I.	Aust S.D., Aust S.D., Buege J.A., Buege J.A.	0
356		10.1016/0304-4165(79)90289-7	313	Biochemistry, Genetics and Molecular Biology, Biochemistry, Genetics and Molecular Biology, Biochemistry, Genetics and Molecular Biology	Biochemistry, Genetics and Molecular Biology, Biochemistry, Genetics and Molecular Biology, Biochemistry, Genetics and Molecular Biology	The role of superoxide anion in the autoxidation of epinephrine and a simple assay for superoxide dismutase.	Levels of glutathione, glutathione reductase and glutathione S-transferase activities in rat lung and liver	Misra H.P., Fridovich I., Misra H.P., Fridovich I., Misra H.P., Fridovich I.	Mannervik B., Mannervik B., Depierre J.W., Depierre J.W., Moron M.S., Moron M.S.	0
357		10.1016/0003-2697(79)90738-3	1046	Biochemistry, Genetics and Molecular Biology, Biochemistry, Genetics and Molecular Biology, Biochemistry, Genetics and Molecular Biology, Biochemistry, Genetics and Molecular Biology	Biochemistry, Genetics and Molecular Biology, Biochemistry, Genetics and Molecular Biology, Biochemistry, Genetics and Molecular Biology, Biochemistry, Genetics and Molecular Biology	The role of superoxide anion in the autoxidation of epinephrine and a simple assay for superoxide dismutase.	Assay for lipid peroxides in animal tissues by thiobarbituric acid reaction	Misra H.P., Fridovich I., Misra H.P., Fridovich I., Misra H.P., Fridovich I.	Yagi K., Yagi K., Ohishi N., Ohishi N., Ohkawa H., Ohkawa H.	0
358		10.1016/0076-6879(90)86141-H	227	Biochemistry, Genetics and Molecular Biology, Biochemistry, Genetics and Molecular Biology	Biochemistry, Genetics and Molecular Biology, Biochemistry, Genetics and Molecular Biology	The role of superoxide anion in the autoxidation of epinephrine and a simple assay for superoxide dismutase.	Determination of Carbonyl Content in Oxidatively Modified Proteins	Misra H.P., Fridovich I., Misra H.P., Fridovich I., Misra H.P., Fridovich I., Misra H.P., Fridovich I., Misra H.P., Fridovich I., Misra H.P., Fridovich I., Misra H.P., Fridovich I., Misra H.P., Fridovich I., Misra H.P., Fridovich I.	Climent I., Climent I., Shaltiel S., Shaltiel S., Stadtman E.R., Stadtman E.R., Lenz A.-G., Lenz A.-G., Amici A., Amici A., Ahn B.-W., Ahn B.-W., Levine R.L., Levine R.L., Garland D., Garland D., Oliver C.N., Oliver C.N.	0
359	10.1016/S0006-291X(72)80218-3	10.1016/0003-2697(76)90527-3	148	Biochemistry, Genetics and Molecular Biology, Biochemistry, Genetics and Molecular Biology, Biochemistry, Genetics and Molecular Biology, Biochemistry, Genetics and Molecular Biology, Biochemistry, Genetics and Molecular Biology, Biochemistry, Genetics and Molecular Biology, Biochemistry, Genetics and Molecular Biology, Biochemistry, Genetics and Molecular Biology, Biochemistry, Genetics and Mole…	Biochemistry, Genetics and Molecular Biology, Biochemistry, Genetics and Molecular Biology, Biochemistry, Genetics and Molecular Biology, Biochemistry, Genetics and Molecular Biology, Biochemistry, Genetics and Molecular Biology, Biochemistry, Genetics and Molecular Biology, Biochemistry, Genetics and Molecular Biology, Biochemistry, Genetics and Molecular Biology, Biochemistry, Genetics and Mole…	The occurrence of superoxide anion in the reaction of reduced phenazine methosulfate and molecular oxygen	A rapid and sensitive method for the quantitation of microgram quantities of protein utilizing the principle of protein-dye binding	Yagi K., Nishikimi M., Appaji Rao N.	Bradford M.M., Bradford M.M., Bradford M.M.	0
360	10.1016/S0006-291X(72)80218-3	10.1016/0003-2697(79)90738-3	365	Biochemistry, Genetics and Molecular Biology, Biochemistry, Genetics and Molecular Biology, Biochemistry, Genetics and Molecular Biology, Biochemistry, Genetics and Molecular Biology, Biochemistry, Genetics and Molecular Biology, Biochemistry, Genetics and Molecular Biology, Biochemistry, Genetics and Molecular Biology, Biochemistry, Genetics and Molecular Biology, Biochemistry, Genetics and Mole…	Biochemistry, Genetics and Molecular Biology, Biochemistry, Genetics and Molecular Biology, Biochemistry, Genetics and Molecular Biology, Biochemistry, Genetics and Molecular Biology, Biochemistry, Genetics and Molecular Biology, Biochemistry, Genetics and Molecular Biology, Biochemistry, Genetics and Molecular Biology, Biochemistry, Genetics and Molecular Biology, Biochemistry, Genetics and Mole…	The occurrence of superoxide anion in the reaction of reduced phenazine methosulfate and molecular oxygen	Assay for lipid peroxides in animal tissues by thiobarbituric acid reaction	Yagi K., Nishikimi M., Appaji Rao N., Yagi K., Nishikimi M., Appaji Rao N., Yagi K., Nishikimi M., Appaji Rao N.	Ohkawa H., Ohkawa H., Ohkawa H., Yagi K., Yagi K., Yagi K., Ohishi N., Ohishi N., Ohishi N.	0
361	10.1016/S0006-291X(72)80218-3	10.1016/S0076-6879(84)05016-3	339	Biochemistry, Genetics and Molecular Biology, Biochemistry, Genetics and Molecular Biology, Biochemistry, Genetics and Molecular Biology, Biochemistry, Genetics and Molecular Biology, Biochemistry, Genetics and Molecular Biology, Biochemistry, Genetics and Molecular Biology	Biochemistry, Genetics and Molecular Biology, Biochemistry, Genetics and Molecular Biology, Biochemistry, Genetics and Molecular Biology, Biochemistry, Genetics and Molecular Biology, Biochemistry, Genetics and Molecular Biology, Biochemistry, Genetics and Molecular Biology	The occurrence of superoxide anion in the reaction of reduced phenazine methosulfate and molecular oxygen	[13] Catalase in Vitro	Yagi K., Nishikimi M., Appaji Rao N.	Aebi H., Aebi H., Aebi H.	0
362	10.1109/PROC.1973.9030	10.1109/TIT.1974.1055186	263	Engineering, Engineering, Engineering	Social Sciences, Computer Science, Computer Science	The Viterbi Algorithm	Optimal Decoding of Linear Codes for Minimizing Symbol Error Rate	Forney G.D., Forney G.D., Forney G.D., Forney G.D.	Raviv J., Bahl L.R., Cocke J., Jelinek F.	1
363	10.1016/0001-6160(73)90064-3	10.1002/pen.760160512	222	Engineering, Engineering, Engineering	Chemistry, Materials Science, Materials Science	Average stress in matrix and average elastic energy of materials with misfitting inclusions	The Halpin‐Tsai equations: A review	Tanaka K., Mori T., Tanaka K., Mori T.	Affdl J.C.H., Affdl J.C.H., Kardos J.L., Kardos J.L.	0
364	10.1016/0001-6160(73)90064-3	10.1016/0022-5096(79)90032-2	527	Engineering, Engineering, Engineering	Physics and Astronomy, Engineering, Engineering	Average stress in matrix and average elastic energy of materials with misfitting inclusions	Solutions for effective shear properties in three phase sphere and cylinder models	Tanaka K., Mori T., Tanaka K., Mori T.	Lo K.H., Lo K.H., Christensen R.M., Christensen R.M.	0
365	10.1080/01969727308546046		211	Engineering, Computer Science, Computer Science, Computer Science, Engineering, Engineering, Computer Science, Computer Science, Computer Science, Computer Science, Computer Science, Computer Science	Engineering, Mathematics, Mathematics, Mathematics, Mathematics, Mathematics, Engineering, Mathematics, Mathematics, Engineering, Mathematics, Engineering	A fuzzy relative of the ISODATA process and its use in detecting compact well-separated clusters	FUZZY CLUSTERING WITH A FUZZY COVARIANCE MATRIX.	Dunn J.C., Dunn J.C.	Gustafson Donald E., Kessel William C.	0
366	10.1080/01969727308546046	10.1016/0098-3004(84)90020-7	199	Engineering, Engineering, Computer Science, Computer Science, Computer Science, Computer Science, Computer Science, Computer Science	Computer Science, Earth and Planetary Sciences, Computer Science, Earth and Planetary Sciences, Computer Science, Earth and Planetary Sciences, Computer Science, Earth and Planetary Sciences	A fuzzy relative of the ISODATA process and its use in detecting compact well-separated clusters	FCM: The fuzzy c-means clustering algorithm	Dunn J.C., Dunn J.C., Dunn J.C.	Full W., Bezdek J.C., Ehrlich R.	0
367	10.1109/TIT.1973.1055037	10.1109/TIT.1974.1055171	243	Computer Science, Computer Science, Social Sciences, Social Sciences, Computer Science, Computer Science, Computer Science, Social Sciences, Computer Science	Social Sciences, Computer Science, Computer Science, Computer Science, Social Sciences, Computer Science, Computer Science, Social Sciences, Computer Science	Noiseless Coding of Correlated Information Sources	Recent Results in the Shannon Theory	Slepian D., Wolf J.K., Slepian D.	Wyner A.D., Wyner A.D., Wyner A.D.	1
368	10.1016/0004-6981(73)90140-6		161	Environmental Science, Environmental Science, Earth and Planetary Sciences	Earth and Planetary Sciences, Earth and Planetary Sciences, Earth and Planetary Sciences	City size and the urban heat island	The energetic basis of the urban heat island (Symons Memorial Lecture, 20 May 1980).	Oke T.R.	Oke T.R.	0
369	10.1177/002199837300700404	10.1115/1.3153664	291	Materials Science, Engineering, Engineering, Engineering, Engineering, Engineering, Engineering, Materials Science, Materials Science, Materials Science, Materials Science, Materials Science	Physics and Astronomy, Engineering, Engineering, Physics and Astronomy, Engineering, Engineering, Physics and Astronomy, Engineering, Engineering, Engineering, Engineering, Physics and Astronomy	A Fatigue Failure Criterion for Fiber Reinforced Materials	Failure criteria for unidirectional fiber composites	Hashin Z., Rotem A.	Hashin Z., Hashin Z.	1
370	10.1080/01969727308545912		237	Engineering, Engineering	Decision Sciences, Business, Management and Accounting	On fuzzy-mathematical programming	DECISION-MAKING IN A FUZZY ENVIRONMENT	Asai K., Tanaka H., Okuda T., Asai K., Tanaka H., Okuda T.	BELLMAN RE, BELLMAN RE, BELLMAN RE, ZADEH LA, ZADEH LA, ZADEH LA	1
371		10.1016/0022-3956(75)90026-6	239	Medicine, Medicine	Medicine, Neuroscience	The set test as an aid to the detection of dementia in old people	""Mini-mental state"". A practical method for grading the cognitive state of patients for the clinician	Kennie A.T., Isaacs B., Kennie A.T., Isaacs B., Kennie A.T., Isaacs B.	Folstein S.E., Folstein S.E., Folstein M.F., Folstein M.F., McHugh P.R., McHugh P.R.	0
372	10.1109/TSMC.1973.4309314		404	Engineering	Engineering	Textural Features for Image Classification	THRESHOLD SELECTION METHOD FROM GRAY-LEVEL HISTOGRAMS.	Haralick R.M., Shanmugam K., Dinstein I.	Otsu Nobuyuki, Otsu Nobuyuki, Otsu Nobuyuki	0
373	10.1109/TSMC.1973.4309314	10.1364/JOSAA.2.001160	134	Engineering, Engineering, Engineering, Engineering	Medicine, Physics and Astronomy, Computer Science, Materials Science	Textural Features for Image Classification	Uncertainty relation for resolution in space, spatial frequency, and orientation optimized by two-dimensional visual cortical filters	Haralick R.M., Shanmugam K., Dinstein I.	Daugman J.G., Daugman J.G., Daugman J.G.	0
374	10.1109/TSMC.1973.4309314	10.1109/TPAMI.1986.4767851	254	Engineering, Engineering, Engineering, Engineering, Engineering	Computer Science, Mathematics, Computer Science, Computer Science, Computer Science	Textural Features for Image Classification	A Computational Approach to Edge Detection	Haralick R.M., Shanmugam K., Dinstein I.	Canny J., Canny J., Canny J.	0
375	10.1147/rd.176.0525	10.1007/3-540-10003-2_104	205	Computer Science, Computer Science	Computer Science, Mathematics	LOGICAL REVERSIBILITY OF COMPUTATION.	Reversible computing	Bennett C.H.	Toffoli T.	1
376	10.2106/00004623-197355080-00006		718	Medicine, Medicine, Medicine, Medicine	Medicine, Medicine, Medicine, Medicine	Ectopic ossification following total hip replacement. Incidence and a method of classification	Radiological demarcation of cemented sockets in total hip replacement	Robinson R.A., Bowerman J.W., Riley Jr L.H., Brooker A.F., Robinson R.A., Bowerman J.W., Riley Jr L.H., Brooker A.F.	DeLee J.G., DeLee J.G., DeLee J.G., DeLee J.G., Charnley J., Charnley J., Charnley J., Charnley J.	0
377	10.1016/0013-7952(73)90013-6	10.1007/BF01261801	361	Earth and Planetary Sciences, Earth and Planetary Sciences, Earth and Planetary Sciences, Earth and Planetary Sciences, Earth and Planetary Sciences, Earth and Planetary Sciences, Earth and Planetary Sciences, Earth and Planetary Sciences, Earth and Planetary Sciences, Earth and Planetary Sciences	Environmental Science, Earth and Planetary Sciences, Earth and Planetary Sciences, Environmental Science, Earth and Planetary Sciences, Earth and Planetary Sciences, Earth and Planetary Sciences, Engineering, Engineering, Earth and Planetary Sciences	Review of a new shear-strength criterion for rock joints	The shear strength of rock joints in theory and practice	Barton N., Barton N.	Barton N., Choubey V.	1
378	10.1016/0013-7952(73)90013-6	10.1016/0148-9062(79)90241-9	166	Earth and Planetary Sciences, Earth and Planetary Sciences, Earth and Planetary Sciences, Earth and Planetary Sciences	Earth and Planetary Sciences, Engineering, Earth and Planetary Sciences, Engineering	Review of a new shear-strength criterion for rock joints	Estimating joint roughness coefficients	Barton N., Barton N.	Tse R., Cruden D.M.	0
379	10.1016/0013-7952(73)90013-6	10.1016/0148-9062(83)90595-8	106	Earth and Planetary Sciences, Earth and Planetary Sciences, Earth and Planetary Sciences, Earth and Planetary Sciences	Engineering, Engineering, Earth and Planetary Sciences, Earth and Planetary Sciences	Review of a new shear-strength criterion for rock joints	Fundamentals of rock joint deformation	Barton N., Barton N., Barton N.	Lumsden A.C., Bandis S.C., Barton N.R.	1
380		10.1111/j.1432-1033.1974.tb03318.x	716	Medicine	Biochemistry, Genetics and Molecular Biology	The control of flux.	A Linear Steady‐State Treatment of Enzymatic Chains: General Properties, Control and Effector Strength	Burns J.A., Kacser H., Burns J.A., Kacser H.	Heinrich R., Heinrich R., Rapoport T.A., Rapoport T.A.	0
381			192	Agricultural and Biological Sciences, Agricultural and Biological Sciences, Medicine, Agricultural and Biological Sciences, Medicine, Biochemistry, Genetics and Molecular Biology, Agricultural and Biological Sciences, Biochemistry, Genetics and Molecular Biology	Medicine, Medicine, Medicine, Social Sciences, Social Sciences, Social Sciences, Social Sciences, Medicine	A new system of dental age assessment	The A.B.F.O. study of third molar development and its use as an estimator of chronological age	Demirjian A., Goldstein H., Tanner J.M., Demirjian A., Goldstein H., Tanner J.M., Demirjian A., Goldstein H., Tanner J.M.	Berryman H.E., Berryman H.E., Berryman H.E., Harris E.F., Harris E.F., Harris E.F., Mincer H.H., Mincer H.H., Mincer H.H.	0
382			190	Medicine, Biochemistry, Genetics and Molecular Biology, Biochemistry, Genetics and Molecular Biology, Biochemistry, Genetics and Molecular Biology, Medicine, Medicine	Agricultural and Biological Sciences, Agricultural and Biological Sciences, Agricultural and Biological Sciences, Biochemistry, Genetics and Molecular Biology, Agricultural and Biological Sciences, Biochemistry, Genetics and Molecular Biology	Distribution of gene frequency as a test of the theory of the selective neutrality of polymorphisms	Estimating F-statistics for the analysis of population structure.	Lewontin R.C., Krakauer J., Lewontin R.C., Krakauer J.	Weir B.S., Weir B.S., Cockerham C.C., Cockerham C.C.	0
383	10.1021/bi00745a020	10.1021/bi00300a022	274	Biochemistry, Genetics and Molecular Biology	Biochemistry, Genetics and Molecular Biology	Quenching of Fluorescence by Oxygen. a Probe for Structural Fluctuations in Macromolecules	Quenching of DNA-Ethidium Fluorescence by Amsacrine and Other Antitumor Agents: A Possible Electron-Transfer Effect†	Weber G., Lakowicz J.R., Weber G., Lakowicz J.R.	Bret M.L., Bret M.L., Baguley B.C., Baguley B.C.	0
384	10.1126/science.179.4073.588	10.1111/j.1432-1033.1974.tb03714.x	585	General	Biochemistry, Genetics and Molecular Biology	Selenium: Biochemical role as a component of glatathione peroxidase	Involvement of the Superoxide Anion Radical in the Autoxidation of Pyrogallol and a Convenient Assay for Superoxide Dismutase	Hafeman D.G., Hoekstra W.G., Ganther H.E., Pope A.L., Swanson A.B., Rotruck J.T., Hafeman D.G., Hoekstra W.G., Ganther H.E., Pope A.L., Swanson A.B., Rotruck J.T.	MARKLUND G., MARKLUND G., MARKLUND G., MARKLUND G., MARKLUND G., MARKLUND G., MARKLUND S., MARKLUND S., MARKLUND S., MARKLUND S., MARKLUND S., MARKLUND S.	0
385	10.1126/science.179.4073.588	10.1016/0003-2697(76)90527-3	249	General, General, General, General	Biochemistry, Genetics and Molecular Biology, Biochemistry, Genetics and Molecular Biology, Biochemistry, Genetics and Molecular Biology, Biochemistry, Genetics and Molecular Biology	Selenium: Biochemical role as a component of glatathione peroxidase	A rapid and sensitive method for the quantitation of microgram quantities of protein utilizing the principle of protein-dye binding	Hafeman D.G., Hoekstra W.G., Ganther H.E., Pope A.L., Swanson A.B., Rotruck J.T.	Bradford M.M., Bradford M.M., Bradford M.M., Bradford M.M., Bradford M.M., Bradford M.M.	0
386	10.1126/science.179.4073.588	10.1016/S0076-6879(78)52032-6	159	General, General	Biochemistry, Genetics and Molecular Biology, Biochemistry, Genetics and Molecular Biology	Selenium: Biochemical role as a component of glatathione peroxidase	Microsomal Lipid Peroxidation	Hafeman D.G., Hoekstra W.G., Ganther H.E., Pope A.L., Swanson A.B., Rotruck J.T., Hafeman D.G., Hoekstra W.G., Ganther H.E., Pope A.L., Swanson A.B., Rotruck J.T.	Aust S.D., Aust S.D., Aust S.D., Aust S.D., Aust S.D., Aust S.D., Buege J.A., Buege J.A., Buege J.A., Buege J.A., Buege J.A., Buege J.A.	0
387	10.1126/science.179.4073.588	10.1016/0304-4165(79)90289-7	583	General, General, General	Biochemistry, Genetics and Molecular Biology, Biochemistry, Genetics and Molecular Biology, Biochemistry, Genetics and Molecular Biology	Selenium: Biochemical role as a component of glatathione peroxidase	Levels of glutathione, glutathione reductase and glutathione S-transferase activities in rat lung and liver	Hafeman D.G., Hoekstra W.G., Ganther H.E., Pope A.L., Swanson A.B., Rotruck J.T., Hafeman D.G., Hoekstra W.G., Ganther H.E., Pope A.L., Swanson A.B., Rotruck J.T., Hafeman D.G., Hoekstra W.G., Ganther H.E., Pope A.L., Swanson A.B., Rotruck J.T.	Moron M.S., Moron M.S., Moron M.S., Moron M.S., Moron M.S., Moron M.S., Mannervik B., Mannervik B., Mannervik B., Mannervik B., Mannervik B., Mannervik B., Depierre J.W., Depierre J.W., Depierre J.W., Depierre J.W., Depierre J.W., Depierre J.W.	0
388	10.1126/science.179.4073.588	10.1016/0076-6879(79)62181-X	526	General, General	Biochemistry, Genetics and Molecular Biology, Biochemistry, Genetics and Molecular Biology	Selenium: Biochemical role as a component of glatathione peroxidase	Selected methods for the determination of ascorbic acid in animal cells, tissues, and fluids	Hafeman D.G., Hoekstra W.G., Ganther H.E., Pope A.L., Swanson A.B., Rotruck J.T., Hafeman D.G., Hoekstra W.G., Ganther H.E., Pope A.L., Swanson A.B., Rotruck J.T., Hafeman D.G., Hoekstra W.G., Ganther H.E., Pope A.L., Swanson A.B., Rotruck J.T.	David Turnbull J., David Turnbull J., David Turnbull J., David Turnbull J., David Turnbull J., David Turnbull J., Sauberlich H.E., Sauberlich H.E., Sauberlich H.E., Sauberlich H.E., Sauberlich H.E., Sauberlich H.E., Omaye S.T., Omaye S.T., Omaye S.T., Omaye S.T., Omaye S.T., Omaye S.T.	0
389	10.1126/science.179.4073.588	10.1016/0003-2697(79)90738-3	992	General, General, General, General	Biochemistry, Genetics and Molecular Biology, Biochemistry, Genetics and Molecular Biology, Biochemistry, Genetics and Molecular Biology, Biochemistry, Genetics and Molecular Biology	Selenium: Biochemical role as a component of glatathione peroxidase	Assay for lipid peroxides in animal tissues by thiobarbituric acid reaction	Hafeman D.G., Hoekstra W.G., Ganther H.E., Pope A.L., Swanson A.B., Rotruck J.T., Hafeman D.G., Hoekstra W.G., Ganther H.E., Pope A.L., Swanson A.B., Rotruck J.T., Hafeman D.G., Hoekstra W.G., Ganther H.E., Pope A.L., Swanson A.B., Rotruck J.T.	Ohishi N., Ohishi N., Ohishi N., Ohishi N., Ohishi N., Ohishi N., Yagi K., Yagi K., Yagi K., Yagi K., Yagi K., Yagi K., Ohkawa H., Ohkawa H., Ohkawa H., Ohkawa H., Ohkawa H., Ohkawa H.	0
390	10.1126/science.179.4073.588	10.1016/S0076-6879(84)05019-9	355	General, General	Biochemistry, Genetics and Molecular Biology, Biochemistry, Genetics and Molecular Biology	Selenium: Biochemical role as a component of glatathione peroxidase	[16] Vitamin E Analysis Methods for Animal Tissues	Hafeman D.G., Hoekstra W.G., Ganther H.E., Pope A.L., Swanson A.B., Rotruck J.T.	Desai I.D., Desai I.D., Desai I.D., Desai I.D., Desai I.D., Desai I.D.	0
391	10.1126/science.179.4073.588	10.1016/S0076-6879(84)05016-3	161	General, General	Biochemistry, Genetics and Molecular Biology, Biochemistry, Genetics and Molecular Biology	Selenium: Biochemical role as a component of glatathione peroxidase	[13] Catalase in Vitro	Hafeman D.G., Hoekstra W.G., Ganther H.E., Pope A.L., Swanson A.B., Rotruck J.T.	Aebi H., Aebi H., Aebi H., Aebi H., Aebi H., Aebi H.	0
392	10.1099/00207713-24-1-54		239	Immunology and Microbiology, Immunology and Microbiology, Immunology and Microbiology, Immunology and Microbiology, Immunology and Microbiology, Immunology and Microbiology, Immunology and Microbiology, Immunology and Microbiology	Biochemistry, Genetics and Molecular Biology, Immunology and Microbiology, Agricultural and Biological Sciences, Biochemistry, Genetics and Molecular Biology, Immunology and Microbiology, Immunology and Microbiology, Agricultural and Biological Sciences, Immunology and Microbiology	Nocardia coeliaca, Nocardia autotrophica, and the nocardin strain	Simplified approach to identification of aerobic actinomycetes by thin layer chromatography	Barnett D.A., Gordon R.E., Hor Nay Pang C., Handerhan J.E., Barnett D.A., Gordon R.E., Hor Nay Pang C., Handerhan J.E.	Roberts G.D., Roberts G.D., Roberts G.D., Roberts G.D., Staneck J.L., Staneck J.L., Staneck J.L., Staneck J.L.	0
393	10.1099/00207713-24-1-54	10.1099/00221287-100-2-221	295	Immunology and Microbiology, Immunology and Microbiology	Immunology and Microbiology, Immunology and Microbiology	Nocardia coeliaca, Nocardia autotrophica, and the nocardin strain	Distribution of menaquinones in actinomycetes and corynebacteria	Barnett D.A., Gordon R.E., Hor Nay Pang C., Handerhan J.E., Barnett D.A., Gordon R.E., Hor Nay Pang C., Handerhan J.E., Barnett D.A., Gordon R.E., Hor Nay Pang C., Handerhan J.E., Barnett D.A., Gordon R.E., Hor Nay Pang C., Handerhan J.E.	Minnikin D.E., Minnikin D.E., Minnikin D.E., Minnikin D.E., Goodfellow M., Goodfellow M., Goodfellow M., Goodfellow M., Pirouz T., Pirouz T., Pirouz T., Pirouz T., Collins M.D., Collins M.D., Collins M.D., Collins M.D.	0
394	10.1099/00207713-24-1-54	10.1016/S0021-9673(00)88433-2	189	Immunology and Microbiology, Immunology and Microbiology, Immunology and Microbiology, Immunology and Microbiology, Immunology and Microbiology, Immunology and Microbiology	Chemistry, Chemistry, Biochemistry, Genetics and Molecular Biology, Biochemistry, Genetics and Molecular Biology, Chemistry, Chemistry	Nocardia coeliaca, Nocardia autotrophica, and the nocardin strain	Thin-layer chromatography of methanolysates of mycolic acid-containing bacteria	Barnett D.A., Gordon R.E., Hor Nay Pang C., Handerhan J.E., Barnett D.A., Gordon R.E., Hor Nay Pang C., Handerhan J.E., Barnett D.A., Gordon R.E., Hor Nay Pang C., Handerhan J.E., Barnett D.A., Gordon R.E., Hor Nay Pang C., Handerhan J.E.	Minnikin D.E., Minnikin D.E., Minnikin D.E., Minnikin D.E., Hutchinson I.G., Hutchinson I.G., Hutchinson I.G., Hutchinson I.G., Caldicott A.B., Caldicott A.B., Caldicott A.B., Caldicott A.B., Goodfellow M., Goodfellow M., Goodfellow M., Goodfellow M.	0
395	10.1099/00207713-24-1-54	10.1016/0167-7012(84)90018-6	409	Immunology and Microbiology, Immunology and Microbiology, Immunology and Microbiology, Immunology and Microbiology, Immunology and Microbiology, Immunology and Microbiology	Immunology and Microbiology, Biochemistry, Genetics and Molecular Biology, Medicine, Biochemistry, Genetics and Molecular Biology, Immunology and Microbiology, Medicine	Nocardia coeliaca, Nocardia autotrophica, and the nocardin strain	An integrated procedure for the extraction of bacterial isoprenoid quinones and polar lipids	Barnett D.A., Gordon R.E., Hor Nay Pang C., Handerhan J.E., Barnett D.A., Gordon R.E., Hor Nay Pang C., Handerhan J.E., Barnett D.A., Gordon R.E., Hor Nay Pang C., Handerhan J.E., Barnett D.A., Gordon R.E., Hor Nay Pang C., Handerhan J.E., Barnett D.A., Gordon R.E., Hor Nay Pang C., Handerhan J.E., Barnett D.A., Gordon R.E., Hor Nay Pang C., Handerhan J.E., Barnett D.A., Gordon R.E., Hor Nay Pang…	Parlett J.H., Parlett J.H., Parlett J.H., Parlett J.H., Schaal A., Schaal A., Schaal A., Schaal A., Athalye M., Athalye M., Athalye M., Athalye M., Alderson G., Alderson G., Alderson G., Alderson G., Goodfellow M., Goodfellow M., Goodfellow M., Goodfellow M., O'Donnell A.G., O'Donnell A.G., O'Donnell A.G., O'Donnell A.G., Minnikin D.E., Minnikin D.E., Minnikin D.E., Minnikin D.E.	0
396		10.1061/(ASCE)0733-9399(1984)110:3(357)	316	Engineering, Earth and Planetary Sciences, Earth and Planetary Sciences, Environmental Science, Environmental Science, Engineering	Engineering, Engineering, Engineering, Engineering, Engineering, Engineering	EXACT AND INVARIANT SECOND-MOMENT CODE FORMAT.	Asymptotic approximations for multinormal integrals	Hasofer Abraham M., Lind Niels C.	Breitung K., Breitung K.	1
397	10.1016/0045-7825(74)90029-2	10.1016/0021-9991(81)90145-5	257	Physics and Astronomy, Engineering, Physics and Astronomy, Engineering, Computer Science, Engineering, Engineering, Engineering, Computer Science, Engineering	Computer Science, Physics and Astronomy, Physics and Astronomy, Physics and Astronomy, Computer Science, Physics and Astronomy, Computer Science, Computer Science, Physics and Astronomy, Computer Science	The numerical computation of turbulent flows	Volume of fluid (VOF) method for the dynamics of free boundaries	Spalding D.B., Launder B.E., Spalding D.B., Launder B.E.	Hirt C.W., Hirt C.W., Nichols B.D., Nichols B.D.	0
398	10.1109/TIT.1974.1055186	10.1109/TIT.1982.1056454	230	Computer Science, Computer Science, Computer Science, Computer Science, Computer Science, Computer Science, Social Sciences, Social Sciences, Social Sciences	Social Sciences, Computer Science, Computer Science, Social Sciences, Computer Science, Computer Science, Social Sciences, Computer Science, Computer Science	Optimal Decoding of Linear Codes for Minimizing Symbol Error Rate	Channel Coding with Multilevel/Phase Signals	Raviv J., Bahl L.R., Jelinek F., Cocke J.	Ungerboeck G., Ungerboeck G., Ungerboeck G., Ungerboeck G.	0
399	10.1190/1.1440444	10.1111/j.1365-246X.1973.tb06513.x	224	Earth and Planetary Sciences, Earth and Planetary Sciences, Earth and Planetary Sciences, Earth and Planetary Sciences	Earth and Planetary Sciences, Earth and Planetary Sciences, Earth and Planetary Sciences, Earth and Planetary Sciences	INVERSION AND INTERPRETATION OF GRAVITY ANOMALIES.	The Rapid Calculation of Potential Anomalies	Oldenburg Douglas W.	Parker R.L.	0
400	10.1159/000136485		567	Pharmacology, Toxicology and Pharmaceutics, Pharmacology, Toxicology and Pharmaceutics, Pharmacology, Toxicology and Pharmaceutics	Biochemistry, Genetics and Molecular Biology, Biochemistry, Genetics and Molecular Biology, Biochemistry, Genetics and Molecular Biology	Bromobenzene-induced liver necrosis. Protective role of glutathione and evidence for 3,4-bromobenzene oxide as the hepatotoxic metabolite	Glutathione S transferases. The first enzymatic step in mercapturic acid formation	Mitchell J.R., Jollow D., Zampaglione N., Gillette J.R., Mitchell J.R., Jollow D., Zampaglione N., Gillette J.R., Mitchell J.R., Jollow D., Zampaglione N., Gillette J.R.	Pabst M.J., Pabst M.J., Pabst M.J., Pabst M.J., Habig W.H., Habig W.H., Habig W.H., Habig W.H., Jakoby W.B., Jakoby W.B., Jakoby W.B., Jakoby W.B.	0
401	10.1159/000136485		229	Pharmacology, Toxicology and Pharmaceutics, Pharmacology, Toxicology and Pharmaceutics, Pharmacology, Toxicology and Pharmaceutics	Biochemistry, Genetics and Molecular Biology, Biochemistry, Genetics and Molecular Biology, Biochemistry, Genetics and Molecular Biology	Bromobenzene-induced liver necrosis. Protective role of glutathione and evidence for 3,4-bromobenzene oxide as the hepatotoxic metabolite	Purification and characterization of the flavoenzyme glutathione reductase from rat liver	Mitchell J.R., Jollow D., Zampaglione N., Gillette J.R., Mitchell J.R., Jollow D., Zampaglione N., Gillette J.R.	Carlberg I., Carlberg I., Carlberg I., Carlberg I., Mannervik B., Mannervik B., Mannervik B., Mannervik B.	0
402	10.1159/000136485	10.1016/0003-2697(79)90738-3	275	Pharmacology, Toxicology and Pharmaceutics, Pharmacology, Toxicology and Pharmaceutics, Pharmacology, Toxicology and Pharmaceutics, Pharmacology, Toxicology and Pharmaceutics	Biochemistry, Genetics and Molecular Biology, Biochemistry, Genetics and Molecular Biology, Biochemistry, Genetics and Molecular Biology, Biochemistry, Genetics and Molecular Biology	Bromobenzene-induced liver necrosis. Protective role of glutathione and evidence for 3,4-bromobenzene oxide as the hepatotoxic metabolite	Assay for lipid peroxides in animal tissues by thiobarbituric acid reaction	Mitchell J.R., Jollow D., Zampaglione N., Gillette J.R., Mitchell J.R., Jollow D., Zampaglione N., Gillette J.R., Mitchell J.R., Jollow D., Zampaglione N., Gillette J.R.	Ohkawa H., Ohkawa H., Ohkawa H., Ohkawa H., Ohishi N., Ohishi N., Ohishi N., Ohishi N., Yagi K., Yagi K., Yagi K., Yagi K.	0
403	10.1159/000136485	10.1016/0003-9861(81)90095-3	193	Pharmacology, Toxicology and Pharmaceutics, Pharmacology, Toxicology and Pharmaceutics, Pharmacology, Toxicology and Pharmaceutics	Biochemistry, Genetics and Molecular Biology, Biochemistry, Genetics and Molecular Biology, Biochemistry, Genetics and Molecular Biology	Bromobenzene-induced liver necrosis. Protective role of glutathione and evidence for 3,4-bromobenzene oxide as the hepatotoxic metabolite	Cytosolic factors which affect microsomal lipid peroxidation in lung and liver	Mitchell J.R., Jollow D., Zampaglione N., Gillette J.R., Mitchell J.R., Jollow D., Zampaglione N., Gillette J.R., Mitchell J.R., Jollow D., Zampaglione N., Gillette J.R.	Colby H.D., Colby H.D., Colby H.D., Colby H.D., Miles P.R., Miles P.R., Miles P.R., Miles P.R., Wright J.R., Wright J.R., Wright J.R., Wright J.R.	0
404	10.1159/000136485	10.1016/S0076-6879(84)05015-1	175	Pharmacology, Toxicology and Pharmaceutics, Pharmacology, Toxicology and Pharmaceutics	Biochemistry, Genetics and Molecular Biology, Biochemistry, Genetics and Molecular Biology	Bromobenzene-induced liver necrosis. Protective role of glutathione and evidence for 3,4-bromobenzene oxide as the hepatotoxic metabolite	[12] Assays of Glutathione Peroxidase	Mitchell J.R., Jollow D., Zampaglione N., Gillette J.R., Mitchell J.R., Jollow D., Zampaglione N., Gillette J.R.	Flohe L., Flohe L., Flohe L., Flohe L., Gunzler W.A., Gunzler W.A., Gunzler W.A., Gunzler W.A.	0
405	10.1159/000136485	10.1016/S0076-6879(84)05016-3	207	Pharmacology, Toxicology and Pharmaceutics, Pharmacology, Toxicology and Pharmaceutics	Biochemistry, Genetics and Molecular Biology, Biochemistry, Genetics and Molecular Biology	Bromobenzene-induced liver necrosis. Protective role of glutathione and evidence for 3,4-bromobenzene oxide as the hepatotoxic metabolite	[13] Catalase in Vitro	Mitchell J.R., Jollow D., Zampaglione N., Gillette J.R.	Aebi H., Aebi H., Aebi H., Aebi H.	0
406	10.1159/000136485		122	Pharmacology, Toxicology and Pharmaceutics, Pharmacology, Toxicology and Pharmaceutics	Biochemistry, Genetics and Molecular Biology, Biochemistry, Genetics and Molecular Biology	Bromobenzene-induced liver necrosis. Protective role of glutathione and evidence for 3,4-bromobenzene oxide as the hepatotoxic metabolite	A modified spectrophotometric assay of superoxide dismutase	Mitchell J.R., Jollow D., Zampaglione N., Gillette J.R., Mitchell J.R., Jollow D., Zampaglione N., Gillette J.R., Mitchell J.R., Jollow D., Zampaglione N., Gillette J.R.	Kakkar P., Kakkar P., Kakkar P., Kakkar P., Viswanathan P.N., Viswanathan P.N., Viswanathan P.N., Viswanathan P.N., Das B., Das B., Das B., Das B.	0
407	10.1159/000136485		229	Pharmacology, Toxicology and Pharmaceutics, Pharmacology, Toxicology and Pharmaceutics	Biochemistry, Genetics and Molecular Biology, Medicine	Bromobenzene-induced liver necrosis. Protective role of glutathione and evidence for 3,4-bromobenzene oxide as the hepatotoxic metabolite	Low Activities of Glutathione-related Enzymes as Factors in the Genesis of Urinary Bladder Cancer	Mitchell J.R., Jollow D., Zampaglione N., Gillette J.R., Mitchell J.R., Jollow D., Zampaglione N., Gillette J.R., Mitchell J.R., Jollow D., Zampaglione N., Gillette J.R., Mitchell J.R., Jollow D., Zampaglione N., Gillette J.R., Mitchell J.R., Jollow D., Zampaglione N., Gillette J.R.	Mohandas J., Mohandas J., Mohandas J., Mohandas J., Horvath J.S., Horvath J.S., Horvath J.S., Horvath J.S., Duggin G.G., Duggin G.G., Duggin G.G., Duggin G.G., Tiller D.J., Tiller D.J., Tiller D.J., Tiller D.J., Marshall J.J., Marshall J.J., Marshall J.J., Marshall J.J.	0
408		10.1016/0022-3956(75)90026-6	340	Medicine, Medicine	Medicine, Neuroscience	Evaluating storage, retention, and retrieval in disordered memory and learning	""Mini-mental state"". A practical method for grading the cognitive state of patients for the clinician	Buschke H., Fuld P.A., Buschke H., Fuld P.A., Buschke H., Fuld P.A.	McHugh P.R., McHugh P.R., Folstein S.E., Folstein S.E., Folstein M.F., Folstein M.F.	0
409		10.1099/00221287-100-2-221	290	Biochemistry, Genetics and Molecular Biology, Immunology and Microbiology, Agricultural and Biological Sciences, Immunology and Microbiology	Immunology and Microbiology, Immunology and Microbiology, Immunology and Microbiology, Immunology and Microbiology	Simplified approach to identification of aerobic actinomycetes by thin layer chromatography	Distribution of menaquinones in actinomycetes and corynebacteria	Staneck J.L., Roberts G.D., Staneck J.L., Roberts G.D., Staneck J.L., Roberts G.D., Staneck J.L., Roberts G.D.	Pirouz T., Pirouz T., Minnikin D.E., Minnikin D.E., Goodfellow M., Goodfellow M., Collins M.D., Collins M.D.	0
410			186	Immunology and Microbiology, Agricultural and Biological Sciences, Immunology and Microbiology, Biochemistry, Genetics and Molecular Biology	Immunology and Microbiology, Immunology and Microbiology, Immunology and Microbiology, Immunology and Microbiology	Simplified approach to identification of aerobic actinomycetes by thin layer chromatography	Numerical classification of Streptomyces and related genera	Staneck J.L., Roberts G.D., Staneck J.L., Roberts G.D., Staneck J.L., Roberts G.D., Staneck J.L., Roberts G.D., Staneck J.L., Roberts G.D., Staneck J.L., Roberts G.D.	Alderson G., Alderson G., Wellington E.M., Wellington E.M., Sneath P.H., Sneath P.H., Sackin M.J., Sackin M.J., Williams S.T., Williams S.T., Goodfellow M., Goodfellow M.	0
411		10.1016/0167-7012(84)90018-6	553	Biochemistry, Genetics and Molecular Biology, Biochemistry, Genetics and Molecular Biology, Biochemistry, Genetics and Molecular Biology, Immunology and Microbiology, Immunology and Microbiology, Immunology and Microbiology, Immunology and Microbiology, Agricultural and Biological Sciences, Immunology and Microbiology, Agricultural and Biological Sciences, Agricultural and Biological Sciences, Im…	Biochemistry, Genetics and Molecular Biology, Immunology and Microbiology, Medicine, Biochemistry, Genetics and Molecular Biology, Immunology and Microbiology, Medicine, Biochemistry, Genetics and Molecular Biology, Immunology and Microbiology, Immunology and Microbiology, Biochemistry, Genetics and Molecular Biology, Medicine, Medicine	Simplified approach to identification of aerobic actinomycetes by thin layer chromatography	An integrated procedure for the extraction of bacterial isoprenoid quinones and polar lipids	Staneck J.L., Roberts G.D., Staneck J.L., Roberts G.D., Staneck J.L., Roberts G.D., Staneck J.L., Roberts G.D., Staneck J.L., Roberts G.D., Staneck J.L., Roberts G.D., Staneck J.L., Roberts G.D.	Alderson G., Alderson G., Athalye M., Athalye M., Schaal A., Schaal A., Parlett J.H., Parlett J.H., Minnikin D.E., Minnikin D.E., O'Donnell A.G., O'Donnell A.G., Goodfellow M., Goodfellow M.	0
412		10.1016/0378-1097(84)90059-4	187	Immunology and Microbiology, Agricultural and Biological Sciences, Agricultural and Biological Sciences, Agricultural and Biological Sciences, Biochemistry, Genetics and Molecular Biology, Biochemistry, Genetics and Molecular Biology, Biochemistry, Genetics and Molecular Biology, Immunology and Microbiology, Immunology and Microbiology, Immunology and Microbiology, Immunology and Microbiology, Im…	Biochemistry, Genetics and Molecular Biology, Biochemistry, Genetics and Molecular Biology, Biochemistry, Genetics and Molecular Biology, Immunology and Microbiology, Biochemistry, Genetics and Molecular Biology, Biochemistry, Genetics and Molecular Biology, Immunology and Microbiology, Biochemistry, Genetics and Molecular Biology, Biochemistry, Genetics and Molecular Biology, Immunology and Micr…	Simplified approach to identification of aerobic actinomycetes by thin layer chromatography	Determination of DNA base composition by reversed-phase high-performance liquid chromatography	Staneck J.L., Roberts G.D., Staneck J.L., Roberts G.D.	Tamaoka J., Tamaoka J., Komagata K., Komagata K.	0
413			725	Immunology and Microbiology, Agricultural and Biological Sciences, Agricultural and Biological Sciences, Biochemistry, Genetics and Molecular Biology, Biochemistry, Genetics and Molecular Biology, Agricultural and Biological Sciences, Biochemistry, Genetics and Molecular Biology, Immunology and Microbiology, Biochemistry, Genetics and Molecular Biology, Agricultural and Biological Sciences, Immun…	Medicine, Agricultural and Biological Sciences, Biochemistry, Genetics and Molecular Biology, Biochemistry, Genetics and Molecular Biology, Biochemistry, Genetics and Molecular Biology, Biochemistry, Genetics and Molecular Biology, Medicine, Agricultural and Biological Sciences, Agricultural and Biological Sciences, Medicine, Biochemistry, Genetics and Molecular Biology, Biochemistry, Genetics an…	Simplified approach to identification of aerobic actinomycetes by thin layer chromatography	The neighbor-joining method: a new method for reconstructing phylogenetic trees.	Staneck J.L., Roberts G.D., Staneck J.L., Roberts G.D.	Saitou N., Saitou N., Nei M., Nei M.	0
414		10.1099/00207713-39-3-224	264	Biochemistry, Genetics and Molecular Biology, Immunology and Microbiology, Immunology and Microbiology, Immunology and Microbiology, Immunology and Microbiology, Biochemistry, Genetics and Molecular Biology, Agricultural and Biological Sciences, Agricultural and Biological Sciences	Immunology and Microbiology, Immunology and Microbiology, Immunology and Microbiology, Immunology and Microbiology, Immunology and Microbiology, Immunology and Microbiology, Immunology and Microbiology, Immunology and Microbiology	Simplified approach to identification of aerobic actinomycetes by thin layer chromatography	Fluorometric deoxyribonucleic acid-deoxyribonucleic acid hybridization in microdilution wells as an alternative to membrane filter hybridization in which radioisotopes are used to determine genetic relatedness among bacterial strains	Staneck J.L., Roberts G.D., Staneck J.L., Roberts G.D., Staneck J.L., Roberts G.D.	Yabuuchi E., Yabuuchi E., Hashimoto Y., Hashimoto Y., Ezaki T., Ezaki T.	0
415	10.1017/S0016672300014634	10.1016/0040-5809(75)90020-9	270	Biochemistry, Genetics and Molecular Biology, Biochemistry, Genetics and Molecular Biology	Agricultural and Biological Sciences, Agricultural and Biological Sciences	The hitch-hiking effect of a favourable gene	On the number of segregating sites in genetical models without recombination	Smith J.M., Haigh J.	Watterson G.A., Watterson G.A.	0
416	10.1016/0002-9343(74)90852-3	10.1016/0002-9343(80)90390-3	213	Medicine	Medicine	Biologic and clinical significance of cryoglobulins. A report of 86 cases	Mixed cryoglobulinemia: Clinical aspects and long-term follow-up of 40 patients	Danon F., Brouet J.-C., Klein M., Seligmann M., Clauvel J.-P., Danon F., Brouet J.-C., Klein M., Seligmann M., Clauvel J.-P., Danon F., Brouet J.-C., Klein M., Seligmann M., Clauvel J.-P., Danon F., Brouet J.-C., Klein M., Seligmann M., Clauvel J.-P., Danon F., Brouet J.-C., Klein M., Seligmann M., Clauvel J.-P., Danon F., Brouet J.-C., Klein M., Seligmann M., Clauvel J.-P., Danon F., Brouet J.-C…	Franklin E.C., Franklin E.C., Franklin E.C., Franklin E.C., Franklin E.C., Gorevic P.D., Gorevic P.D., Gorevic P.D., Gorevic P.D., Gorevic P.D., Kassab H.J., Kassab H.J., Kassab H.J., Kassab H.J., Kassab H.J., Prose P., Prose P., Prose P., Prose P., Prose P., Levo Y., Levo Y., Levo Y., Levo Y., Levo Y., Kohn R., Kohn R., Kohn R., Kohn R., Kohn R., Meltzer M., Meltzer M., Meltzer M., Meltzer M., M…	0
417	10.1126/science.185.4157.1124	10.1111/j.1539-6924.1988.tb01168.x	120	General, General	Engineering, Medicine	Judgment under uncertainty: Heuristics and biases	The Social Amplification of Risk: A Conceptual Framework	Tversky A., Kahneman D., Tversky A., Kahneman D., Tversky A., Kahneman D., Tversky A., Kahneman D., Tversky A., Kahneman D., Tversky A., Kahneman D., Tversky A., Kahneman D., Tversky A., Kahneman D.	Goble R., Goble R., Kasperson J.X., Kasperson J.X., Ratick S., Ratick S., Renn O., Renn O., Kasperson R.E., Kasperson R.E., Brown H.S., Brown H.S., Emel J., Emel J., Slovic P., Slovic P.	0
418	10.1111/j.1432-1033.1974.tb03714.x		867	Biochemistry, Genetics and Molecular Biology, Biochemistry, Genetics and Molecular Biology, Biochemistry, Genetics and Molecular Biology	Biochemistry, Genetics and Molecular Biology, Biochemistry, Genetics and Molecular Biology, Biochemistry, Genetics and Molecular Biology	Involvement of the Superoxide Anion Radical in the Autoxidation of Pyrogallol and a Convenient Assay for Superoxide Dismutase	Glutathione S transferases. The first enzymatic step in mercapturic acid formation	MARKLUND G., MARKLUND S., MARKLUND G., MARKLUND S., MARKLUND G., MARKLUND S.	Habig W.H., Habig W.H., Pabst M.J., Pabst M.J., Jakoby W.B., Jakoby W.B.	0
419	10.1111/j.1432-1033.1974.tb03714.x	10.1016/0006-291X(76)90747-6	245	Biochemistry, Genetics and Molecular Biology, Biochemistry, Genetics and Molecular Biology, Biochemistry, Genetics and Molecular Biology, Biochemistry, Genetics and Molecular Biology	Biochemistry, Genetics and Molecular Biology, Biochemistry, Genetics and Molecular Biology, Biochemistry, Genetics and Molecular Biology, Biochemistry, Genetics and Molecular Biology	Involvement of the Superoxide Anion Radical in the Autoxidation of Pyrogallol and a Convenient Assay for Superoxide Dismutase	Glutathione peroxidase activity in selenium-deficient rat liver	MARKLUND G., MARKLUND S., MARKLUND G., MARKLUND S.	Lawrence R.A., Lawrence R.A., Burk R.F., Burk R.F.	0
420	10.1111/j.1432-1033.1974.tb03714.x	10.1016/S0076-6879(78)52032-6	283	Biochemistry, Genetics and Molecular Biology, Biochemistry, Genetics and Molecular Biology	Biochemistry, Genetics and Molecular Biology, Biochemistry, Genetics and Molecular Biology	Involvement of the Superoxide Anion Radical in the Autoxidation of Pyrogallol and a Convenient Assay for Superoxide Dismutase	Microsomal Lipid Peroxidation	MARKLUND G., MARKLUND S., MARKLUND G., MARKLUND S.	Aust S.D., Aust S.D., Buege J.A., Buege J.A.	0
421	10.1111/j.1432-1033.1974.tb03714.x	10.1016/0304-4165(79)90289-7	573	Biochemistry, Genetics and Molecular Biology, Biochemistry, Genetics and Molecular Biology, Biochemistry, Genetics and Molecular Biology	Biochemistry, Genetics and Molecular Biology, Biochemistry, Genetics and Molecular Biology, Biochemistry, Genetics and Molecular Biology	Involvement of the Superoxide Anion Radical in the Autoxidation of Pyrogallol and a Convenient Assay for Superoxide Dismutase	Levels of glutathione, glutathione reductase and glutathione S-transferase activities in rat lung and liver	MARKLUND G., MARKLUND S., MARKLUND G., MARKLUND S., MARKLUND G., MARKLUND S.	Mannervik B., Mannervik B., Depierre J.W., Depierre J.W., Moron M.S., Moron M.S.	0
422	10.1111/j.1432-1033.1974.tb03714.x	10.1016/0076-6879(79)62181-X	234	Biochemistry, Genetics and Molecular Biology, Biochemistry, Genetics and Molecular Biology	Biochemistry, Genetics and Molecular Biology, Biochemistry, Genetics and Molecular Biology	Involvement of the Superoxide Anion Radical in the Autoxidation of Pyrogallol and a Convenient Assay for Superoxide Dismutase	Selected methods for the determination of ascorbic acid in animal cells, tissues, and fluids	MARKLUND G., MARKLUND S., MARKLUND G., MARKLUND S., MARKLUND G., MARKLUND S.	Omaye S.T., Omaye S.T., Sauberlich H.E., Sauberlich H.E., David Turnbull J., David Turnbull J.	0
423	10.1111/j.1432-1033.1974.tb03714.x	10.1016/0003-2697(79)90738-3	1289	Biochemistry, Genetics and Molecular Biology, Biochemistry, Genetics and Molecular Biology, Biochemistry, Genetics and Molecular Biology, Biochemistry, Genetics and Molecular Biology	Biochemistry, Genetics and Molecular Biology, Biochemistry, Genetics and Molecular Biology, Biochemistry, Genetics and Molecular Biology, Biochemistry, Genetics and Molecular Biology	Involvement of the Superoxide Anion Radical in the Autoxidation of Pyrogallol and a Convenient Assay for Superoxide Dismutase	Assay for lipid peroxides in animal tissues by thiobarbituric acid reaction	MARKLUND G., MARKLUND S., MARKLUND G., MARKLUND S., MARKLUND G., MARKLUND S.	Yagi K., Yagi K., Ohishi N., Ohishi N., Ohkawa H., Ohkawa H.	0
424	10.1111/j.1432-1033.1974.tb03714.x	10.1016/S0076-6879(84)05015-1	188	Biochemistry, Genetics and Molecular Biology, Biochemistry, Genetics and Molecular Biology	Biochemistry, Genetics and Molecular Biology, Biochemistry, Genetics and Molecular Biology	Involvement of the Superoxide Anion Radical in the Autoxidation of Pyrogallol and a Convenient Assay for Superoxide Dismutase	[12] Assays of Glutathione Peroxidase	MARKLUND G., MARKLUND S., MARKLUND G., MARKLUND S.	Gunzler W.A., Gunzler W.A., Flohe L., Flohe L.	0
425		10.1016/0003-2697(78)90342-1	187	Biochemistry, Genetics and Molecular Biology, Biochemistry, Genetics and Molecular Biology, Biochemistry, Genetics and Molecular Biology, Biochemistry, Genetics and Molecular Biology, Biochemistry, Genetics and Molecular Biology, Biochemistry, Genetics and Molecular Biology, Biochemistry, Genetics and Molecular Biology, Biochemistry, Genetics and Molecular Biology, Biochemistry, Genetics and Mole…	Biochemistry, Genetics and Molecular Biology, Biochemistry, Genetics and Molecular Biology, Biochemistry, Genetics and Molecular Biology, Biochemistry, Genetics and Molecular Biology, Biochemistry, Genetics and Molecular Biology, Biochemistry, Genetics and Molecular Biology, Biochemistry, Genetics and Molecular Biology, Biochemistry, Genetics and Molecular Biology, Biochemistry, Genetics and Mole…	Glutathione S transferases. The first enzymatic step in mercapturic acid formation	Determination of malonaldehyde precursor in tissues by thiobarbituric acid test	Habig W.H., Jakoby W.B., Pabst M.J., Habig W.H., Jakoby W.B., Pabst M.J.	Uchiyama M., Uchiyama M., Uchiyama M., Mihara M., Mihara M., Mihara M.	0
426		10.1016/0076-6879(79)62181-X	247	Biochemistry, Genetics and Molecular Biology, Biochemistry, Genetics and Molecular Biology, Biochemistry, Genetics and Molecular Biology, Biochemistry, Genetics and Molecular Biology, Biochemistry, Genetics and Molecular Biology, Biochemistry, Genetics and Molecular Biology	Biochemistry, Genetics and Molecular Biology, Biochemistry, Genetics and Molecular Biology, Biochemistry, Genetics and Molecular Biology, Biochemistry, Genetics and Molecular Biology, Biochemistry, Genetics and Molecular Biology, Biochemistry, Genetics and Molecular Biology	Glutathione S transferases. The first enzymatic step in mercapturic acid formation	Selected methods for the determination of ascorbic acid in animal cells, tissues, and fluids	Habig W.H., Jakoby W.B., Pabst M.J., Habig W.H., Jakoby W.B., Pabst M.J., Habig W.H., Jakoby W.B., Pabst M.J.	Sauberlich H.E., Sauberlich H.E., Sauberlich H.E., David Turnbull J., David Turnbull J., David Turnbull J., Omaye S.T., Omaye S.T., Omaye S.T.	0
427		10.1016/S0076-6879(84)05019-9	199	Biochemistry, Genetics and Molecular Biology, Biochemistry, Genetics and Molecular Biology, Biochemistry, Genetics and Molecular Biology, Biochemistry, Genetics and Molecular Biology, Biochemistry, Genetics and Molecular Biology, Biochemistry, Genetics and Molecular Biology	Biochemistry, Genetics and Molecular Biology, Biochemistry, Genetics and Molecular Biology, Biochemistry, Genetics and Molecular Biology, Biochemistry, Genetics and Molecular Biology, Biochemistry, Genetics and Molecular Biology, Biochemistry, Genetics and Molecular Biology	Glutathione S transferases. The first enzymatic step in mercapturic acid formation	[16] Vitamin E Analysis Methods for Animal Tissues	Habig W.H., Jakoby W.B., Pabst M.J.	Desai I.D., Desai I.D., Desai I.D.	0
428		10.1016/S0076-6879(85)13073-9	191	Biochemistry, Genetics and Molecular Biology, Biochemistry, Genetics and Molecular Biology, Biochemistry, Genetics and Molecular Biology, Biochemistry, Genetics and Molecular Biology, Biochemistry, Genetics and Molecular Biology, Biochemistry, Genetics and Molecular Biology	Biochemistry, Genetics and Molecular Biology, Biochemistry, Genetics and Molecular Biology, Biochemistry, Genetics and Molecular Biology, Biochemistry, Genetics and Molecular Biology, Biochemistry, Genetics and Molecular Biology, Biochemistry, Genetics and Molecular Biology	Glutathione S transferases. The first enzymatic step in mercapturic acid formation	[70] Determination of glutathione and glutathione disulfide in biological samples	Habig W.H., Jakoby W.B., Pabst M.J.	Anderson M.E., Anderson M.E., Anderson M.E.	0
429		10.1016/0003-2697(88)90554-4	108	Biochemistry, Genetics and Molecular Biology, Biochemistry, Genetics and Molecular Biology, Biochemistry, Genetics and Molecular Biology, Biochemistry, Genetics and Molecular Biology, Biochemistry, Genetics and Molecular Biology, Biochemistry, Genetics and Molecular Biology, Biochemistry, Genetics and Molecular Biology, Biochemistry, Genetics and Molecular Biology, Biochemistry, Genetics and Mole…	Biochemistry, Genetics and Molecular Biology, Biochemistry, Genetics and Molecular Biology, Biochemistry, Genetics and Molecular Biology, Biochemistry, Genetics and Molecular Biology, Biochemistry, Genetics and Molecular Biology, Biochemistry, Genetics and Molecular Biology, Biochemistry, Genetics and Molecular Biology, Biochemistry, Genetics and Molecular Biology, Biochemistry, Genetics and Mole…	Glutathione S transferases. The first enzymatic step in mercapturic acid formation	A spectrophotometric method for determination of catalase activity in small tissue samples	Habig W.H., Jakoby W.B., Pabst M.J., Habig W.H., Jakoby W.B., Pabst M.J.	Johansson L.H., Johansson L.H., Johansson L.H., Hakan Borg L.A., Hakan Borg L.A., Hakan Borg L.A.	0
430		10.1016/0014-4827(88)90265-0	184	Biochemistry, Genetics and Molecular Biology, Biochemistry, Genetics and Molecular Biology, Biochemistry, Genetics and Molecular Biology	Biochemistry, Genetics and Molecular Biology, Biochemistry, Genetics and Molecular Biology, Biochemistry, Genetics and Molecular Biology	Glutathione S transferases. The first enzymatic step in mercapturic acid formation	A simple technique for quantitation of low levels of DNA damage in individual cells	Habig W.H., Jakoby W.B., Pabst M.J., Habig W.H., Jakoby W.B., Pabst M.J., Habig W.H., Jakoby W.B., Pabst M.J., Habig W.H., Jakoby W.B., Pabst M.J.	Tice R.R., Tice R.R., Tice R.R., Schneider E.L., Schneider E.L., Schneider E.L., McCoy M.T., McCoy M.T., McCoy M.T., Singh N.P., Singh N.P., Singh N.P.	0
431	10.3758/BF03203267	10.1016/0013-4694(83)90135-9	191	Psychology, Neuroscience, Neuroscience, Psychology, Psychology, Psychology	Medicine, Neuroscience, Medicine, Neuroscience, Neuroscience, Medicine	Effects of noise letters upon the identification of a target letter in a nonsearch task	A new method for off-line removal of ocular artifact	Eriksen B.A., Eriksen C.W., Eriksen B.A., Eriksen C.W., Eriksen B.A., Eriksen C.W.	Donchin E., Donchin E., Gratton G., Gratton G., Coles M.G.H., Coles M.G.H.	0
432		10.1016/0003-2697(76)90527-3	318	Pharmacology, Toxicology and Pharmaceutics, Pharmacology, Toxicology and Pharmaceutics, Pharmacology, Toxicology and Pharmaceutics, Pharmacology, Toxicology and Pharmaceutics, Pharmacology, Toxicology and Pharmaceutics, Pharmacology, Toxicology and Pharmaceutics, Pharmacology, Toxicology and Pharmaceutics, Pharmacology, Toxicology and Pharmaceutics	Biochemistry, Genetics and Molecular Biology, Biochemistry, Genetics and Molecular Biology, Biochemistry, Genetics and Molecular Biology, Biochemistry, Genetics and Molecular Biology, Biochemistry, Genetics and Molecular Biology, Biochemistry, Genetics and Molecular Biology, Biochemistry, Genetics and Molecular Biology, Biochemistry, Genetics and Molecular Biology	Ethoxyresorufin: direct fluorimetric assay of a microsomal O dealkylation which is preferentially inducible by 3 methylcholanthrene	A rapid and sensitive method for the quantitation of microgram quantities of protein utilizing the principle of protein-dye binding	Burke M.D., Mayer R.T.	Bradford M.M., Bradford M.M.	0
433	10.2208/jscej1969.1974.232_59		175	Engineering	Engineering	STRESS-DEFORMATION AND STRENGTH CHARACTERISTICS OF SOIL UNDER THREE DIFFERENT PRINCIPAL STRESSES.	ELASTOPLASTIC STRESS-STRAIN THEORY FOR COHESIONLESS SOIL	Matsuoka Hajime, Nakai Teruo, Matsuoka Hajime, Nakai Teruo	Duncan James M., Duncan James M., Lade Poul V., Lade Poul V.	0
434	10.1109/TAC.1974.1100705	10.1093/biomet/65.2.297	223	Engineering, Engineering, Engineering, Engineering, Engineering, Engineering, Computer Science, Engineering, Computer Science, Computer Science, Computer Science, Engineering, Engineering, Engineering, Engineering, Computer Science, Engineering, Computer Science	Decision Sciences, Agricultural and Biological Sciences, Mathematics, Mathematics, Agricultural and Biological Sciences, Decision Sciences, Mathematics, Mathematics, Mathematics, Agricultural and Biological Sciences, Agricultural and Biological Sciences, Agricultural and Biological Sciences, Agricultural and Biological Sciences, Mathematics, Mathematics, Decision Sciences, Mathematics, Mathematics	A New Look at the Statistical Model Identification	On a measure of lack of fit in time series models	Akaike H., Akaike H.	Box G.E.P., Ljung G.M.	0
435	10.1109/TAC.1974.1100705	10.1007/BF01731581	238	Engineering, Engineering, Engineering, Engineering, Engineering, Engineering, Engineering, Engineering, Engineering, Engineering, Engineering, Engineering, Engineering, Computer Science, Computer Science, Computer Science, Computer Science, Computer Science, Computer Science, Computer Science, Computer Science, Engineering, Engineering, Engineering	Medicine, Agricultural and Biological Sciences, Agricultural and Biological Sciences, Agricultural and Biological Sciences, Agricultural and Biological Sciences, Biochemistry, Genetics and Molecular Biology, Biochemistry, Genetics and Molecular Biology, Biochemistry, Genetics and Molecular Biology, Biochemistry, Genetics and Molecular Biology, Biochemistry, Genetics and Molecular Biology, Biochem…	A New Look at the Statistical Model Identification	A simple method for estimating evolutionary rates of base substitutions through comparative studies of nucleotide sequences	Akaike H.	Kimura M.	0
436	10.1109/TAC.1974.1100705		206	Computer Science, Engineering, Engineering, Engineering, Engineering, Engineering, Engineering, Engineering, Engineering, Computer Science, Computer Science, Computer Science	Agricultural and Biological Sciences, Medicine, Biochemistry, Genetics and Molecular Biology, Biochemistry, Genetics and Molecular Biology, Agricultural and Biological Sciences, Medicine, Biochemistry, Genetics and Molecular Biology, Biochemistry, Genetics and Molecular Biology, Agricultural and Biological Sciences, Medicine, Biochemistry, Genetics and Molecular Biology, Biochemistry, Genetics an…	A New Look at the Statistical Model Identification	The neighbor-joining method: a new method for reconstructing phylogenetic trees.	Akaike H., Akaike H.	Saitou N., Nei M.	0
437	10.1016/S0006-3495(74)85959-X	10.1515/znc-1973-11-1209	206	Biochemistry, Genetics and Molecular Biology	Biochemistry, Genetics and Molecular Biology	Bending Resistance and Chemically Induced Moments in Membrane Bilayers	Elastic Properties of Lipid Bilayers: Theory and Possible Experiments	Evans E.A.	Helfrich W.	0
438	10.1016/S0140-6736(74)91639-0	10.1016/0022-3956(75)90026-6	219	Medicine, Medicine	Medicine, Neuroscience	ASSESSMENT OF COMA AND IMPAIRED CONSCIOUSNESS. A Practical Scale	""Mini-mental state"". A practical method for grading the cognitive state of patients for the clinician	Jennett B., Teasdale G., Jennett B., Teasdale G., Jennett B., Teasdale G.	McHugh P.R., McHugh P.R., Folstein S.E., Folstein S.E., Folstein M.F., Folstein M.F.	0
439	10.1016/0165-1161(75)90058-8	10.1016/0014-4827(88)90265-0	154	Medicine, Biochemistry, Genetics and Molecular Biology, Pharmacology, Toxicology and Pharmaceutics	Biochemistry, Genetics and Molecular Biology, Biochemistry, Genetics and Molecular Biology, Biochemistry, Genetics and Molecular Biology	The micronucleus test	A simple technique for quantitation of low levels of DNA damage in individual cells	Schmid W., Schmid W., Schmid W., Schmid W.	Schneider E.L., McCoy M.T., Singh N.P., Tice R.R.	0
440	10.1007/BF00261375	10.1016/0020-7683(78)90008-2	603	Mathematics, Mathematics, Mathematics, Engineering, Engineering, Engineering, Engineering, Mathematics	Engineering, Engineering, Engineering, Engineering, Engineering, Engineering, Engineering, Engineering	A continuum theory of elastic material surfaces	Surface stress in solids	Gurtin M.E., Ian Murdoch A., Gurtin M.E., Ian Murdoch A.	Gurtin M.E., Gurtin M.E., Ian Murdoch A., Ian Murdoch A.	1
441	10.1016/S0020-7373(75)80002-2	10.1016/0020-0255(75)90036-5	207	Engineering, Engineering, Engineering, Engineering, Engineering, Engineering	Computer Science, Decision Sciences, Engineering, Computer Science, Mathematics, Computer Science	EXPERIMENT IN LINGUISTIC SYNTHESIS WITH A FUZZY LOGIC CONTROLLER.	The concept of a linguistic variable and its application to approximate reasoning-I	Mamdani E.H., Assilian S.	Zadeh L.A., Zadeh L.A.	0
442	10.1016/0020-0255(75)90036-5	10.1016/S0165-0114(83)80082-7	168	Computer Science, Computer Science, Computer Science, Computer Science, Decision Sciences, Decision Sciences, Mathematics, Engineering, Engineering, Mathematics, Computer Science, Computer Science	Mathematics, Mathematics, Computer Science, Mathematics, Computer Science, Mathematics, Mathematics, Computer Science, Mathematics, Computer Science, Computer Science, Computer Science	The concept of a linguistic variable and its application to approximate reasoning-I	A fuzzy extension of Saaty's priority theory	Zadeh L.A., Zadeh L.A.	Pedrycz W., van Laarhoven P.J.M.	0
443	10.1016/0020-0255(75)90036-5	10.1016/0165-0114(87)90148-5	147	Engineering, Decision Sciences, Decision Sciences, Decision Sciences, Mathematics, Mathematics, Mathematics, Engineering, Engineering, Engineering, Engineering, Engineering, Engineering, Decision Sciences, Decision Sciences, Computer Science, Computer Science, Computer Science, Computer Science, Computer Science, Computer Science, Computer Science, Computer Science, Computer Science, Computer Sci…	Mathematics, Computer Science, Decision Sciences, Decision Sciences, Engineering, Decision Sciences, Decision Sciences, Computer Science, Computer Science, Decision Sciences, Decision Sciences, Engineering, Computer Science, Mathematics, Engineering, Computer Science, Computer Science, Computer Science, Decision Sciences, Decision Sciences, Engineering, Mathematics, Computer Science, Computer Sci…	The concept of a linguistic variable and its application to approximate reasoning-I	A method of inference in approximate reasoning based on interval-valued fuzzy sets	Zadeh L.A.	Gorzalczany M.B.	0
444	10.1016/0020-0255(75)90036-5	10.1007/BF01001956	151	Computer Science, Decision Sciences, Mathematics, Computer Science, Engineering, Computer Science	Engineering, Engineering, Engineering, Engineering, Engineering, Engineering	The concept of a linguistic variable and its application to approximate reasoning-I	Rough sets	Zadeh L.A.	Pawlak Z.	0
445	10.1016/0020-0255(75)90046-8	10.1109/21.87068	198	Engineering, Computer Science, Computer Science, Computer Science, Mathematics, Decision Sciences	Engineering, Engineering, Engineering, Engineering, Engineering, Engineering	The concept of a linguistic variable and its application to approximate reasoning-II	On Ordered Weighted Averaging Aggregation Operators in Multicriteria Decisionmaking	Zadeh L.A.	Yager R.R.	0
446			197	Engineering	Earth and Planetary Sciences	A tidal model of the north-west European continental shelf.	Numerical treatment of cross-shelf open boundaries in a barotropic coastal ocean model.	Flather R.A.	Chapman D.C.	0
447	10.1016/0040-5809(75)90020-9		303	Agricultural and Biological Sciences, Agricultural and Biological Sciences, Agricultural and Biological Sciences, Agricultural and Biological Sciences	Medicine, Medicine, Biochemistry, Genetics and Molecular Biology, Biochemistry, Genetics and Molecular Biology	On the number of segregating sites in genetical models without recombination	Statistical properties of the number of recombination events in the history of a sample of DNA sequences	Watterson G.A., Watterson G.A.	Kaplan N.L., Hudson R.R.	0
448	10.1111/j.1469-8986.1975.tb01284.x	10.1111/j.1469-8986.1978.tb01390.x	361	Psychology, Psychology, Psychology, Biochemistry, Genetics and Molecular Biology, Biochemistry, Genetics and Molecular Biology, Medicine, Biochemistry, Genetics and Molecular Biology, Psychology, Medicine, Medicine, Medicine, Psychology, Psychology, Psychology, Psychology, Biochemistry, Genetics and Molecular Biology	Psychology, Psychology, Medicine, Psychology, Biochemistry, Genetics and Molecular Biology, Biochemistry, Genetics and Molecular Biology, Psychology, Psychology, Medicine, Psychology, Psychology, Biochemistry, Genetics and Molecular Biology, Medicine, Psychology, Biochemistry, Genetics and Molecular Biology, Medicine	The more or less startling effects of weak prestimulation	Prestimulus Effects on Human Startle Reflex in Normals and Schizophrenics	Graham F.K., Graham F.K., Graham F.K., Graham F.K., Graham F.K., Graham F.K.	Geyer M., Callaway E., Stone C., Braff D., Bali L., Glick I.	1
449	10.1115/1.3423596		217	Engineering, Physics and Astronomy, Engineering	Engineering, Engineering, Engineering	Coefficient of restitution interpreted as damping in vibroimpact	Contact force model with hysteresis damping for impact analysis of multibody systems	Hunt K.H., Crossley F.R.E., Hunt K.H., Crossley F.R.E.	Nikravesh P.E., Nikravesh P.E., Lankarani H.M., Lankarani H.M.	0
450	10.1109/TCOM.1975.1092854	10.1109/TCOM.1980.1094608	428	Engineering	Engineering	A Method of Self-Recovering Equalization for Multilevel Amplitude-Modulation Systems	Self-Recovering Equalization and Carrier Tracking in Two-Dimensional Data Communication Systems	Sato Y.	Godard D.N.	1
451	10.1016/0024-3795(75)90075-0	10.1016/0034-4877(72)90011-0	386	Mathematics, Mathematics, Mathematics, Mathematics, Mathematics, Mathematics, Mathematics, Mathematics	Mathematics, Mathematics, Physics and Astronomy, Physics and Astronomy, Physics and Astronomy, Physics and Astronomy, Mathematics, Mathematics	Completely positive linear maps on complex matrices	Linear transformations which preserve trace and positive semidefiniteness of operators	Choi M.-D.	Jamiolkowski A.	0
452	10.1016/S0022-460X(75)80105-2	10.1016/0022-460X(76)90948-2	144	Physics and Astronomy, Engineering, Engineering, Engineering, Engineering, Engineering, Engineering, Engineering, Physics and Astronomy, Physics and Astronomy, Physics and Astronomy, Physics and Astronomy, Physics and Astronomy, Engineering, Physics and Astronomy, Physics and Astronomy	Engineering, Physics and Astronomy, Engineering, Engineering, Engineering, Physics and Astronomy, Physics and Astronomy, Engineering, Physics and Astronomy, Physics and Astronomy, Engineering, Engineering, Physics and Astronomy, Physics and Astronomy, Engineering, Physics and Astronomy	Acoustic radiation from an airfoil in a turbulent stream	Noise due to turbulent flow past a trailing edge	Amiet R.K.	Amiet R.K.	1
453	10.1002/j.1538-7305.1975.tb02040.x	10.1109/TIT.1978.1055892	1722	Engineering, Engineering, Engineering, Engineering	Social Sciences, Computer Science, Computer Science, Engineering	The Wire‐Tap Channel	Broadcast Channels with Confidential Messages	Wyner A.D., Wyner A.D.	Csiszar I., Korner J.	1
454	10.1002/j.1538-7305.1975.tb02040.x	10.1109/TIT.1978.1055917	1086	Engineering, Engineering, Engineering	Computer Science, Social Sciences, Computer Science	The Wire‐Tap Channel	The Gaussian Wire-Tap Channel	Wyner A.D., Wyner A.D.	Hellman M.E., Leung-Yan-Cheong S.K.	1
455	10.1002/j.1538-7305.1975.tb02040.x	10.1109/18.243431	283	Engineering, Engineering, Engineering	Computer Science, Social Sciences, Computer Science	The Wire‐Tap Channel	Common Randomness in Information Theory and Cryptography—Part I: Secret Sharing	Wyner A.D.	Ahlswede R.	1
456	10.1145/361219.361220	10.1016/0306-4573(88)90021-0	445	Mathematics, Mathematics, Mathematics, Mathematics, Computer Science, Computer Science, Computer Science, Computer Science, Computer Science, Computer Science, Computer Science, Computer Science, Computer Science, Computer Science, Computer Science, Computer Science, Computer Science, Computer Science, Computer Science, Computer Science, Computer Science, Computer Science, Computer Science, Compu…	Social Sciences, Computer Science, Computer Science, Decision Sciences, Social Sciences, Social Sciences, Engineering, Decision Sciences, Engineering, Social Sciences, Computer Science, Computer Science, Decision Sciences, Engineering, Decision Sciences, Computer Science, Computer Science, Computer Science, Decision Sciences, Computer Science, Social Sciences, Engineering, Decision Sciences, Engi…	A Vector Space Model for Automatic Indexing	Term-weighting approaches in automatic text retrieval	Yang C.S., Salton G., Wong A., Yang C.S., Salton G., Wong A.	Salton G., Salton G., Salton G., Buckley C., Buckley C., Buckley C.	0
457	10.1145/361219.361220	10.1108/eb046814	329	Computer Science, Computer Science, Computer Science, Computer Science, Computer Science, Computer Science, Computer Science, Computer Science, Computer Science, Computer Science, Mathematics, Mathematics	Social Sciences, Social Sciences, Computer Science, Social Sciences, Computer Science, Social Sciences, Computer Science, Computer Science, Computer Science, Social Sciences, Computer Science, Social Sciences	A Vector Space Model for Automatic Indexing	An algorithm for suffix stripping	Yang C.S., Salton G., Wong A.	Porter M.F., Porter M.F., Porter M.F.	0
458	10.1145/361219.361220	10.1108/eb026526	137	Computer Science, Computer Science, Computer Science, Computer Science, Mathematics, Mathematics, Computer Science, Computer Science, Computer Science, Computer Science, Computer Science, Computer Science	Social Sciences, Computer Science, Computer Science, Social Sciences, Computer Science, Social Sciences, Social Sciences, Computer Science, Social Sciences, Computer Science, Social Sciences, Computer Science	A Vector Space Model for Automatic Indexing	A statistical interpretation of term specificity and its application in retrieval	Yang C.S., Salton G., Wong A.	Jones K.S., Jones K.S., Jones K.S.	0
459		10.1016/0165-0114(84)90069-1	190	Computer Science, Mathematics, Mathematics, Engineering, Engineering, Engineering, Engineering, Computer Science, Computer Science, Computer Science, Computer Science, Computer Science	Computer Science, Mathematics, Computer Science, Mathematics, Computer Science, Mathematics, Computer Science, Mathematics, Computer Science, Mathematics, Computer Science, Mathematics	FUZZY METRICS AND STATISTICAL METRIC SPACES.	On fuzzy metric spaces	Kramosil Ivan, Michalek Jiri, Kramosil Ivan, Michalek Jiri	Kaleva O., Kaleva O., Seikkala S., Seikkala S.	1
460		10.1016/0165-0114(84)90034-4	146	Computer Science, Mathematics, Mathematics, Engineering, Engineering, Engineering, Engineering, Computer Science, Computer Science, Computer Science, Computer Science, Computer Science	Mathematics, Mathematics, Computer Science, Mathematics, Computer Science, Mathematics, Computer Science, Computer Science, Mathematics, Computer Science, Mathematics, Computer Science	FUZZY METRICS AND STATISTICAL METRIC SPACES.	Fuzzy topological vector spaces II	Kramosil Ivan, Michalek Jiri	Katsaras A.K., Katsaras A.K.	0
461	10.1016/0020-0255(75)90017-1	10.1109/21.87068	148	Engineering, Decision Sciences, Computer Science, Computer Science, Computer Science, Mathematics	Engineering, Engineering, Engineering, Engineering, Engineering, Engineering	The concept of a linguistic variable and its application to approximate reasoning-III	On Ordered Weighted Averaging Aggregation Operators in Multicriteria Decisionmaking	Zadeh L.A.	Yager R.R.	0
462		10.1016/0003-2697(79)90738-3	163	Medicine, Medicine, Medicine, Medicine	Biochemistry, Genetics and Molecular Biology, Biochemistry, Genetics and Molecular Biology, Biochemistry, Genetics and Molecular Biology, Biochemistry, Genetics and Molecular Biology	The estimation of red cell superoxide dismutase activity	Assay for lipid peroxides in animal tissues by thiobarbituric acid reaction	Winterbourn C.C., Hawkins R.E., Brian M., Carrell R.W., Winterbourn C.C., Hawkins R.E., Brian M., Carrell R.W., Winterbourn C.C., Hawkins R.E., Brian M., Carrell R.W.	Ohishi N., Ohishi N., Ohishi N., Ohishi N., Ohkawa H., Ohkawa H., Ohkawa H., Ohkawa H., Yagi K., Yagi K., Yagi K., Yagi K.	0
463	10.7164/antibiotics.28.727	10.7164/antibiotics.28.721	313	Pharmacology, Toxicology and Pharmaceutics, Pharmacology, Toxicology and Pharmaceutics, Pharmacology, Toxicology and Pharmaceutics, Pharmacology, Toxicology and Pharmaceutics	Pharmacology, Toxicology and Pharmaceutics, Pharmacology, Toxicology and Pharmaceutics, Pharmacology, Toxicology and Pharmaceutics, Pharmacology, Toxicology and Pharmaceutics	Rapamycin (Ay-22,989), a New Antifungal Antibiotic. II. Fermentation, Isolation and Characterization	Rapamycin (AY-22,989), a new antifungal antibiotic. I. taxonomy of the producing streptomycete and isolation of the active principle	Vezina C., Sehgal S.N., Baker H., Vezina C., Sehgal S.N., Baker H.	Kudelski A., Kudelski A., Kudelski A., Vezina C., Vezina C., Vezina C.	1
464		10.1021/bi00514a017	234	Pharmacology, Toxicology and Pharmaceutics	Biochemistry, Genetics and Molecular Biology	The characterization of two specific drug binding sites on human serum albumin	Thermodynamics of Protein Association Reactions: Forces Contributing to Stability	Birkett D.J., Wade D.N., Sudlow G., Birkett D.J., Wade D.N., Sudlow G.	Subramanian S., Subramanian S., Subramanian S., Ross P.D., Ross P.D., Ross P.D.	0
465		10.1016/0003-2697(76)90527-3	244	Biochemistry, Genetics and Molecular Biology, Biochemistry, Genetics and Molecular Biology, Biochemistry, Genetics and Molecular Biology, Biochemistry, Genetics and Molecular Biology, Biochemistry, Genetics and Molecular Biology, Biochemistry, Genetics and Molecular Biology, Biochemistry, Genetics and Molecular Biology, Biochemistry, Genetics and Molecular Biology, Biochemistry, Genetics and Mole…	Biochemistry, Genetics and Molecular Biology, Biochemistry, Genetics and Molecular Biology, Biochemistry, Genetics and Molecular Biology, Biochemistry, Genetics and Molecular Biology, Biochemistry, Genetics and Molecular Biology, Biochemistry, Genetics and Molecular Biology, Biochemistry, Genetics and Molecular Biology, Biochemistry, Genetics and Molecular Biology, Biochemistry, Genetics and Mole…	Purification and characterization of the flavoenzyme glutathione reductase from rat liver	A rapid and sensitive method for the quantitation of microgram quantities of protein utilizing the principle of protein-dye binding	Mannervik B., Carlberg I.	Bradford M.M., Bradford M.M.	0
466		10.1016/0003-2697(79)90738-3	219	Biochemistry, Genetics and Molecular Biology, Biochemistry, Genetics and Molecular Biology, Biochemistry, Genetics and Molecular Biology, Biochemistry, Genetics and Molecular Biology, Biochemistry, Genetics and Molecular Biology, Biochemistry, Genetics and Molecular Biology, Biochemistry, Genetics and Molecular Biology, Biochemistry, Genetics and Molecular Biology, Biochemistry, Genetics and Mole…	Biochemistry, Genetics and Molecular Biology, Biochemistry, Genetics and Molecular Biology, Biochemistry, Genetics and Molecular Biology, Biochemistry, Genetics and Molecular Biology, Biochemistry, Genetics and Molecular Biology, Biochemistry, Genetics and Molecular Biology, Biochemistry, Genetics and Molecular Biology, Biochemistry, Genetics and Molecular Biology, Biochemistry, Genetics and Mole…	Purification and characterization of the flavoenzyme glutathione reductase from rat liver	Assay for lipid peroxides in animal tissues by thiobarbituric acid reaction	Mannervik B., Carlberg I., Mannervik B., Carlberg I., Mannervik B., Carlberg I.	Ohishi N., Ohishi N., Ohkawa H., Ohkawa H., Yagi K., Yagi K.	0
467			195	Biochemistry, Genetics and Molecular Biology, Biochemistry, Genetics and Molecular Biology, Biochemistry, Genetics and Molecular Biology, Biochemistry, Genetics and Molecular Biology, Biochemistry, Genetics and Molecular Biology, Biochemistry, Genetics and Molecular Biology	Biochemistry, Genetics and Molecular Biology, Biochemistry, Genetics and Molecular Biology, Medicine, Medicine, Medicine, Biochemistry, Genetics and Molecular Biology	Purification and characterization of the flavoenzyme glutathione reductase from rat liver	Low Activities of Glutathione-related Enzymes as Factors in the Genesis of Urinary Bladder Cancer	Mannervik B., Carlberg I., Mannervik B., Carlberg I., Mannervik B., Carlberg I., Mannervik B., Carlberg I., Mannervik B., Carlberg I.	Tiller D.J., Tiller D.J., Horvath J.S., Horvath J.S., Mohandas J., Mohandas J., Duggin G.G., Duggin G.G., Marshall J.J., Marshall J.J.	1
468		10.1016/0022-3956(75)90026-6	241	Medicine, Medicine	Medicine, Neuroscience	The post stroke hemiplegic patient. I. A method for evaluation of physical performance	""Mini-mental state"". A practical method for grading the cognitive state of patients for the clinician	Fugl Meyer A.R., Leyman I., Jaasko L., Fugl Meyer A.R., Leyman I., Jaasko L., Fugl Meyer A.R., Leyman I., Jaasko L.	McHugh P.R., McHugh P.R., McHugh P.R., Folstein M.F., Folstein M.F., Folstein M.F., Folstein S.E., Folstein S.E., Folstein S.E.	0
469		10.1097/00004356-198112000-00001	234	Medicine, Medicine	Medicine, Health Professions	The post stroke hemiplegic patient. I. A method for evaluation of physical performance	A performance test for assessment of upper limb function in physical rehabilitation treatment and research	Fugl Meyer A.R., Leyman I., Jaasko L.	Lyle R.C., Lyle R.C., Lyle R.C.	0
470		10.5014/ajot.39.6.386	142	Medicine	Health Professions	The post stroke hemiplegic patient. I. A method for evaluation of physical performance	Adult norms for the Box and Block Test of manual dexterity.	Fugl Meyer A.R., Leyman I., Jaasko L., Fugl Meyer A.R., Leyman I., Jaasko L., Fugl Meyer A.R., Leyman I., Jaasko L., Fugl Meyer A.R., Leyman I., Jaasko L.	Weber K., Weber K., Weber K., Kashman N., Kashman N., Kashman N., Volland G., Volland G., Volland G., Mathiowetz V., Mathiowetz V., Mathiowetz V.	0
471	10.1016/0022-3956(75)90026-6	10.1016/S0010-9452(76)80035-4	489	Neuroscience, Neuroscience, Medicine, Medicine, Neuroscience, Medicine	Psychology, Psychology, Neuroscience, Psychology, Neuroscience, Psychology	""Mini-mental state"". A practical method for grading the cognitive state of patients for the clinician	A Modified Card Sorting Test Sensitive to Frontal Lobe Defects	Folstein M.F., McHugh P.R., Folstein S.E.	Nelson H.E., Nelson H.E., Nelson H.E.	0
472	10.1016/0022-3956(75)90026-6	10.2307/2529310	322	Medicine, Neuroscience, Neuroscience, Medicine, Neuroscience, Neuroscience, Neuroscience, Medicine, Medicine, Medicine	Mathematics, Agricultural and Biological Sciences, Biochemistry, Genetics and Molecular Biology, Mathematics, Mathematics, Mathematics, Immunology and Microbiology, Agricultural and Biological Sciences, Biochemistry, Genetics and Molecular Biology, Immunology and Microbiology	""Mini-mental state"". A practical method for grading the cognitive state of patients for the clinician	The measurement of observer agreement for categorical data	Folstein M.F., McHugh P.R., Folstein S.E., Folstein M.F., McHugh P.R., Folstein S.E.	Landis J.R., Landis J.R., Landis J.R., Koch G.G., Koch G.G., Koch G.G.	0
473	10.1016/0022-3956(75)90026-6	10.1192/bjp.134.4.382	1045	Medicine, Neuroscience	Medicine, Medicine	""Mini-mental state"". A practical method for grading the cognitive state of patients for the clinician	A new depression scale designed to be sensitive to change	Folstein M.F., McHugh P.R., Folstein S.E., Folstein M.F., McHugh P.R., Folstein S.E.	Asberg M., Asberg M., Asberg M., Montgomery S.A., Montgomery S.A., Montgomery S.A.	0
474	10.1016/0022-3956(75)90026-6	10.1037/0278-7393.6.2.174	284	Neuroscience, Medicine	Medicine, Medicine	""Mini-mental state"". A practical method for grading the cognitive state of patients for the clinician	A standardized set of 260 pictures: Norms for name agreement, image agreement, familiarity, and visual complexity	Folstein M.F., McHugh P.R., Folstein S.E., Folstein M.F., McHugh P.R., Folstein S.E.	Vanderwart M., Vanderwart M., Vanderwart M., Snodgrass J.G., Snodgrass J.G., Snodgrass J.G.	0
475	10.1016/0022-3956(75)90026-6	10.1037/0022-3514.51.6.1173	246	Neuroscience, Medicine, Medicine, Neuroscience	Social Sciences, Social Sciences, Psychology, Psychology	""Mini-mental state"". A practical method for grading the cognitive state of patients for the clinician	The Moderator-Mediator Variable Distinction in Social Psychological Research. Conceptual, Strategic, and Statistical Considerations	Folstein M.F., McHugh P.R., Folstein S.E., Folstein M.F., McHugh P.R., Folstein S.E.	Baron R.M., Baron R.M., Baron R.M., Kenny D.A., Kenny D.A., Kenny D.A.	0
476	10.1016/0022-3956(75)90026-6	10.1161/01.STR.20.7.864	182	Medicine, Medicine, Neuroscience, Neuroscience, Neuroscience, Medicine	Medicine, Nursing, Medicine, Medicine, Nursing, Medicine	""Mini-mental state"". A practical method for grading the cognitive state of patients for the clinician	Measurements of acute cerebral infarction: A clinical examination scale	Folstein M.F., McHugh P.R., Folstein S.E., Folstein M.F., McHugh P.R., Folstein S.E., Folstein M.F., McHugh P.R., Folstein S.E., Folstein M.F., McHugh P.R., Folstein S.E., Folstein M.F., McHugh P.R., Folstein S.E., Folstein M.F., McHugh P.R., Folstein S.E., Folstein M.F., McHugh P.R., Folstein S.E., Folstein M.F., McHugh P.R., Folstein S.E., Folstein M.F., McHugh P.R., Folstein S.E., Folstein M.F…	Brott T., Brott T., Brott T., Adams H.P., Adams H.P., Adams H.P., Olinger C.P., Olinger C.P., Olinger C.P., Marle J.R., Marle J.R., Marle J.R., Barsan W.G., Barsan W.G., Barsan W.G., Biller J., Biller J., Biller J., Spilker J., Spilker J., Spilker J., Holleran R., Holleran R., Holleran R., Eberle R., Eberle R., Eberle R., Hertzberg V., Hertzberg V., Hertzberg V., Rorick M., Rorick M., Rorick M., …	0
477	10.1016/0022-3956(75)90026-6	10.1037/0033-2909.86.2.420	273	Neuroscience, Neuroscience, Medicine, Neuroscience, Medicine, Medicine	Medicine, Arts and Humanities, Medicine, Psychology, Psychology, Arts and Humanities	""Mini-mental state"". A practical method for grading the cognitive state of patients for the clinician	Intraclass correlations: Uses in assessing rater reliability	Folstein M.F., McHugh P.R., Folstein S.E., Folstein M.F., McHugh P.R., Folstein S.E.	Shrout P.E., Shrout P.E., Shrout P.E., Fleiss J.L., Fleiss J.L., Fleiss J.L.	0
478	10.1016/0022-3956(75)90026-6	10.1177/014662167700100306	2130	Neuroscience, Neuroscience, Medicine, Medicine	Social Sciences, Psychology, Social Sciences, Psychology	""Mini-mental state"". A practical method for grading the cognitive state of patients for the clinician	The CES-D Scale: A Self-Report Depression Scale for Research in the General Population	Folstein M.F., McHugh P.R., Folstein S.E.	Radloff L.S., Radloff L.S., Radloff L.S.	0
479	10.1111/j.1532-5415.1975.tb00927.x	10.1016/0021-9681(87)90171-8	233	Medicine	Medicine	A Short Portable Mental Status Questionnaire for the Assessment of Organic Brain Deficit in Elderly Patients	A new method of classifying prognostic comorbidity in longitudinal studies: Development and validation	Pfeiffer E., Pfeiffer E., Pfeiffer E., Pfeiffer E.	MacKenzie C.R., Pompei P., Charlson M.E., Ales K.L.	0
480	10.1111/j.1532-5415.1975.tb00927.x	10.1177/014662167700100306	348	Medicine, Medicine	Psychology, Social Sciences	A Short Portable Mental Status Questionnaire for the Assessment of Organic Brain Deficit in Elderly Patients	The CES-D Scale: A Self-Report Depression Scale for Research in the General Population	Pfeiffer E.	Radloff L.S.	0
481	10.1021/i160057a011	10.1021/ie00076a024	180	Engineering, Engineering, Engineering	Engineering, Chemistry, Chemical Engineering	A New Two-Constant Equation of State	Generalized Multiparameter Correlation for Nonpolar and Polar Fluid Transport Properties	Robinson D.B., Peng D.-Y., Robinson D.B., Peng D.-Y., Robinson D.B., Peng D.-Y., Robinson D.B., Peng D.-Y., Robinson D.B., Peng D.-Y.	Ajlan M., Ajlan M., Horng T.-C., Horng T.-C., Lee L.L., Lee L.L., Starling K.E., Starling K.E., Ajlan M., Ajlan M.	0
482	10.1287/moor.1.2.117	10.1016/0305-0483(83)90088-9	315	Mathematics, Decision Sciences, Decision Sciences, Mathematics, Decision Sciences, Computer Science, Computer Science, Mathematics, Computer Science	Decision Sciences, Business, Management and Accounting, Decision Sciences, Business, Management and Accounting, Decision Sciences, Decision Sciences, Business, Management and Accounting, Decision Sciences, Decision Sciences	COMPLEXITY OF FLOWSHOP AND JOBSHOP SCHEDULING.	A heuristic algorithm for the m-machine, n-job flow-shop sequencing problem	Sethi Ravi, Johnson D.S., Garey M.R., Sethi Ravi, Johnson D.S., Garey M.R., Sethi Ravi, Johnson D.S., Garey M.R.	Enscore Jr. E.E., Enscore Jr. E.E., Enscore Jr. E.E., Nawaz M., Nawaz M., Nawaz M., Ham I., Ham I., Ham I.	0
483	10.1137/0314056	10.1007/BF01581204	121	Mathematics, Mathematics, Mathematics, Mathematics	Computer Science, Mathematics, Computer Science, Mathematics	MONOTONE OPERATORS AND THE PROXIMAL POINT ALGORITHM.	On the Douglas-Rachford splitting method and the proximal point algorithm for maximal monotone operators	Rockafellar R.Tyrrell, Rockafellar R.Tyrrell	Bertsekas D.P., Eckstein J.	1
484	10.1109/TASSP.1976.1162830		244	Computer Science, Computer Science	Engineering, Computer Science	The Generalized Correlation Method for Estimation of Time Delay	MULTIPLE EMITTER LOCATION AND SIGNAL PARAMETER ESTIMATION.	Knapp C.H., Carter G.C.	Schmidt Ralph O., Schmidt Ralph O.	0
485	10.1109/TAC.1976.1101352	10.1007/BF00276493	407	Computer Science, Computer Science, Computer Science, Engineering, Engineering, Engineering, Engineering, Engineering, Engineering	Mathematics, Engineering, Mathematics, Engineering, Mathematics, Mathematics, Engineering, Mathematics, Mathematics	The Stability of Nonlinear Dissipative Systems	Dissipative dynamical systems part I: General theory	Moylan P., Hill D.	Willems J.C., Willems J.C.	1
486	10.1088/0022-3735/9/11/032	10.1103/PhysRevB.3.1338	190	Physics and Astronomy, Physics and Astronomy, Engineering	Physics and Astronomy, Physics and Astronomy, Physics and Astronomy	A simple method for the determination of the optical constants n, k and the thickness of a weakly absorbing thin film	Behavior of the electronic dielectric constant in covalent and ionic materials	Fillard J.P., Manifacier J.C., Gasiot J., Fillard J.P., Manifacier J.C., Gasiot J.	DiDomenico M., DiDomenico M., DiDomenico M., Wemple S.H., Wemple S.H., Wemple S.H.	0
487		10.3109/00207459008994241	190	Medicine	Neuroscience	A self assessment questionnaire to determine Morningness Eveningness in human circadian rhythms	Subjective and objective sleepiness in the active individual	Horne J.A., Ostberg O., Horne J.A., Ostberg O.	Akerstedt T., Akerstedt T., Gillberg M., Gillberg M.	0
488		10.1093/sleep/14.6.540	334	Medicine, Medicine	Medicine, Medicine	A self assessment questionnaire to determine Morningness Eveningness in human circadian rhythms	A new method for measuring daytime sleepiness: The Epworth sleepiness scale	Horne J.A., Ostberg O.	Johns M.W., Johns M.W.	0
489	10.1016/S0010-9452(76)80035-4	10.1016/S0010-9452(78)80055-0	185	Psychology, Psychology, Psychology, Psychology, Neuroscience, Neuroscience, Neuroscience, Psychology, Psychology	Psychology, Neuroscience, Psychology, Psychology, Psychology, Psychology, Neuroscience, Neuroscience, Psychology	A Modified Card Sorting Test Sensitive to Frontal Lobe Defects	The Involvement of the Frontal Lobes in Cognitive Estimation	Nelson H.E., Nelson H.E.	Shallice T., Evans M.E.	0
490	10.1007/BF01685575	10.1038/238037a0	129	Pharmacology, Toxicology and Pharmaceutics, Environmental Science, Environmental Science	General, General, General	Photodechlorination of PCB's in the presence of titanium dioxide in aqueous suspensions	Electrochemical photolysis of water at a semiconductor electrode	Carey J.H., Tosine H.M., Lawrence J., Carey J.H., Tosine H.M., Lawrence J.	Honda K., Honda K., Honda K., Fujishima A., Fujishima A., Fujishima A.	0
491	10.1016/0003-2697(76)90326-2	10.1016/0003-2697(79)90738-3	382	Biochemistry, Genetics and Molecular Biology, Biochemistry, Genetics and Molecular Biology, Biochemistry, Genetics and Molecular Biology, Biochemistry, Genetics and Molecular Biology, Biochemistry, Genetics and Molecular Biology, Biochemistry, Genetics and Molecular Biology, Biochemistry, Genetics and Molecular Biology, Biochemistry, Genetics and Molecular Biology, Biochemistry, Genetics and Mole…	Biochemistry, Genetics and Molecular Biology, Biochemistry, Genetics and Molecular Biology, Biochemistry, Genetics and Molecular Biology, Biochemistry, Genetics and Molecular Biology, Biochemistry, Genetics and Molecular Biology, Biochemistry, Genetics and Molecular Biology, Biochemistry, Genetics and Molecular Biology, Biochemistry, Genetics and Molecular Biology, Biochemistry, Genetics and Mole…	A fluorometric method for determination of oxidized and reduced glutathione in tissues	Assay for lipid peroxides in animal tissues by thiobarbituric acid reaction	Hilf R., Hissin P.J., Hilf R., Hissin P.J., Hilf R., Hissin P.J.	Yagi K., Yagi K., Ohkawa H., Ohkawa H., Ohishi N., Ohishi N.	0
492	10.1016/0003-2697(76)90326-2	10.1016/S0076-6879(84)05015-1	204	Biochemistry, Genetics and Molecular Biology, Biochemistry, Genetics and Molecular Biology, Biochemistry, Genetics and Molecular Biology, Biochemistry, Genetics and Molecular Biology, Biochemistry, Genetics and Molecular Biology, Biochemistry, Genetics and Molecular Biology	Biochemistry, Genetics and Molecular Biology, Biochemistry, Genetics and Molecular Biology, Biochemistry, Genetics and Molecular Biology, Biochemistry, Genetics and Molecular Biology, Biochemistry, Genetics and Molecular Biology, Biochemistry, Genetics and Molecular Biology	A fluorometric method for determination of oxidized and reduced glutathione in tissues	[12] Assays of Glutathione Peroxidase	Hilf R., Hissin P.J., Hilf R., Hissin P.J.	Flohe L., Flohe L., Gunzler W.A., Gunzler W.A.	0
493	10.1016/0003-2697(76)90326-2	10.1016/S0076-6879(84)05016-3	228	Biochemistry, Genetics and Molecular Biology, Biochemistry, Genetics and Molecular Biology, Biochemistry, Genetics and Molecular Biology, Biochemistry, Genetics and Molecular Biology, Biochemistry, Genetics and Molecular Biology, Biochemistry, Genetics and Molecular Biology	Biochemistry, Genetics and Molecular Biology, Biochemistry, Genetics and Molecular Biology, Biochemistry, Genetics and Molecular Biology, Biochemistry, Genetics and Molecular Biology, Biochemistry, Genetics and Molecular Biology, Biochemistry, Genetics and Molecular Biology	A fluorometric method for determination of oxidized and reduced glutathione in tissues	[13] Catalase in Vitro	Hilf R., Hissin P.J.	Aebi H., Aebi H.	0
494	10.1016/0022-2836(76)90311-9	10.1016/0021-9991(77)90121-8	202	Biochemistry, Genetics and Molecular Biology, Biochemistry, Genetics and Molecular Biology, Biochemistry, Genetics and Molecular Biology, Biochemistry, Genetics and Molecular Biology	Computer Science, Physics and Astronomy, Computer Science, Physics and Astronomy	Theoretical studies of enzymic reactions: Dielectric, electrostatic and steric stabilization of the carbonium ion in the reaction of lysozyme	Nonphysical sampling distributions in Monte Carlo free-energy estimation: Umbrella sampling	Levitt M., Warshel A., Levitt M., Warshel A.	Torrie G.M., Torrie G.M., Valleau J.P., Valleau J.P.	0
495	10.1016/0022-2836(76)90311-9	10.1103/PhysRevLett.55.2471	319	Biochemistry, Genetics and Molecular Biology, Biochemistry, Genetics and Molecular Biology	Physics and Astronomy, Physics and Astronomy	Theoretical studies of enzymic reactions: Dielectric, electrostatic and steric stabilization of the carbonium ion in the reaction of lysozyme	Unified approach for molecular dynamics and density-functional theory	Levitt M., Warshel A., Levitt M., Warshel A.	Car R., Car R., Parrinello M., Parrinello M.	0
496	10.1016/0022-2836(76)90311-9	10.1063/1.448118	254	Biochemistry, Genetics and Molecular Biology, Biochemistry, Genetics and Molecular Biology, Biochemistry, Genetics and Molecular Biology, Biochemistry, Genetics and Molecular Biology	Chemistry, Physics and Astronomy, Chemistry, Physics and Astronomy	Theoretical studies of enzymic reactions: Dielectric, electrostatic and steric stabilization of the carbonium ion in the reaction of lysozyme	Molecular dynamics with coupling to an external bath	Levitt M., Warshel A., Levitt M., Warshel A., Levitt M., Warshel A., Levitt M., Warshel A., Levitt M., Warshel A.	Postma J.P.M., Postma J.P.M., Dinola A., Dinola A., Van Gunsteren W.F., Van Gunsteren W.F., Berendsen H.J.C., Berendsen H.J.C., Haak J.R., Haak J.R.	0
497		10.1016/0003-2697(76)90527-3	138	Biochemistry, Genetics and Molecular Biology, Biochemistry, Genetics and Molecular Biology, Biochemistry, Genetics and Molecular Biology, Biochemistry, Genetics and Molecular Biology, Biochemistry, Genetics and Molecular Biology, Biochemistry, Genetics and Molecular Biology, Biochemistry, Genetics and Molecular Biology, Biochemistry, Genetics and Molecular Biology, Biochemistry, Genetics and Mole…	Biochemistry, Genetics and Molecular Biology, Biochemistry, Genetics and Molecular Biology, Biochemistry, Genetics and Molecular Biology, Biochemistry, Genetics and Molecular Biology, Biochemistry, Genetics and Molecular Biology, Biochemistry, Genetics and Molecular Biology, Biochemistry, Genetics and Molecular Biology, Biochemistry, Genetics and Molecular Biology, Biochemistry, Genetics and Mole…	Mechanism for the several activities of the glutathione S transferases	A rapid and sensitive method for the quantitation of microgram quantities of protein utilizing the principle of protein-dye binding	Keen J.H., Jakoby W.B., Habig W.H.	Bradford M.M., Bradford M.M., Bradford M.M.	0
498	10.1093/biomet/63.3.581	10.1093/biomet/70.1.41	216	Mathematics, Mathematics, Mathematics, Mathematics, Mathematics, Decision Sciences, Mathematics, Decision Sciences, Decision Sciences, Decision Sciences, Mathematics, Mathematics, Mathematics, Mathematics, Decision Sciences, Decision Sciences, Agricultural and Biological Sciences, Agricultural and Biological Sciences, Agricultural and Biological Sciences, Agricultural and Biological Sciences, Agr…	Mathematics, Mathematics, Decision Sciences, Agricultural and Biological Sciences, Agricultural and Biological Sciences, Mathematics, Agricultural and Biological Sciences, Mathematics, Mathematics, Decision Sciences, Agricultural and Biological Sciences, Decision Sciences, Mathematics, Mathematics, Agricultural and Biological Sciences, Agricultural and Biological Sciences, Mathematics, Mathematic…	Inference and missing data	The central role of the propensity score in observational studies for causal effects	Rubin D.B., Rubin D.B.	Rosenbaum P.R., Rubin D.B.	0
499		10.1021/bi00514a017	267	Pharmacology, Toxicology and Pharmaceutics	Biochemistry, Genetics and Molecular Biology	Further characterization of specific drug binding sites on human serum albumin	Thermodynamics of Protein Association Reactions: Forces Contributing to Stability	Sudlow G., Birkett D.J., Wade D.N., Sudlow G., Birkett D.J., Wade D.N.	Ross P.D., Ross P.D., Ross P.D., Subramanian S., Subramanian S., Subramanian S.	0
500	10.1016/0003-2697(76)90527-3	10.1016/0003-2697(76)90488-7	288	Biochemistry, Genetics and Molecular Biology, Biochemistry, Genetics and Molecular Biology, Biochemistry, Genetics and Molecular Biology, Biochemistry, Genetics and Molecular Biology, Biochemistry, Genetics and Molecular Biology, Biochemistry, Genetics and Molecular Biology, Biochemistry, Genetics and Molecular Biology, Biochemistry, Genetics and Molecular Biology, Biochemistry, Genetics and Mole…	Biochemistry, Genetics and Molecular Biology, Biochemistry, Genetics and Molecular Biology, Biochemistry, Genetics and Molecular Biology, Biochemistry, Genetics and Molecular Biology, Biochemistry, Genetics and Molecular Biology, Biochemistry, Genetics and Molecular Biology, Biochemistry, Genetics and Molecular Biology, Biochemistry, Genetics and Molecular Biology, Biochemistry, Genetics and Mole…	A rapid and sensitive method for the quantitation of microgram quantities of protein utilizing the principle of protein-dye binding	Inhibition of nitrite formation from hydroxylammoniumchloride: A simple assay for superoxide dismutase	Bradford M.M., Bradford M.M.	Heupel A., Elstner E.F.	0
501	10.1016/0003-2697(76)90527-3	10.1016/0003-2697(78)90342-1	287	Biochemistry, Genetics and Molecular Biology, Biochemistry, Genetics and Molecular Biology, Biochemistry, Genetics and Molecular Biology, Biochemistry, Genetics and Molecular Biology, Biochemistry, Genetics and Molecular Biology, Biochemistry, Genetics and Molecular Biology, Biochemistry, Genetics and Molecular Biology, Biochemistry, Genetics and Molecular Biology, Biochemistry, Genetics and Mole…	Biochemistry, Genetics and Molecular Biology, Biochemistry, Genetics and Molecular Biology, Biochemistry, Genetics and Molecular Biology, Biochemistry, Genetics and Molecular Biology, Biochemistry, Genetics and Molecular Biology, Biochemistry, Genetics and Molecular Biology, Biochemistry, Genetics and Molecular Biology, Biochemistry, Genetics and Molecular Biology, Biochemistry, Genetics and Mole…	A rapid and sensitive method for the quantitation of microgram quantities of protein utilizing the principle of protein-dye binding	Determination of malonaldehyde precursor in tissues by thiobarbituric acid test	Bradford M.M., Bradford M.M.	Uchiyama M., Mihara M.	0
502	10.1016/0003-2697(76)90527-3	10.1016/0304-4165(79)90289-7	238	Biochemistry, Genetics and Molecular Biology, Biochemistry, Genetics and Molecular Biology, Biochemistry, Genetics and Molecular Biology, Biochemistry, Genetics and Molecular Biology, Biochemistry, Genetics and Molecular Biology, Biochemistry, Genetics and Molecular Biology, Biochemistry, Genetics and Molecular Biology, Biochemistry, Genetics and Molecular Biology, Biochemistry, Genetics and Mole…	Biochemistry, Genetics and Molecular Biology, Biochemistry, Genetics and Molecular Biology, Biochemistry, Genetics and Molecular Biology, Biochemistry, Genetics and Molecular Biology, Biochemistry, Genetics and Molecular Biology, Biochemistry, Genetics and Molecular Biology, Biochemistry, Genetics and Molecular Biology, Biochemistry, Genetics and Molecular Biology, Biochemistry, Genetics and Mole…	A rapid and sensitive method for the quantitation of microgram quantities of protein utilizing the principle of protein-dye binding	Levels of glutathione, glutathione reductase and glutathione S-transferase activities in rat lung and liver	Bradford M.M., Bradford M.M., Bradford M.M.	Mannervik B., Depierre J.W., Moron M.S.	0
503	10.1016/0003-2697(76)90527-3	10.1016/S0076-6879(81)77046-0	242	Biochemistry, Genetics and Molecular Biology, Biochemistry, Genetics and Molecular Biology, Biochemistry, Genetics and Molecular Biology, Biochemistry, Genetics and Molecular Biology, Biochemistry, Genetics and Molecular Biology, Biochemistry, Genetics and Molecular Biology, Biochemistry, Genetics and Molecular Biology, Biochemistry, Genetics and Molecular Biology	Biochemistry, Genetics and Molecular Biology, Biochemistry, Genetics and Molecular Biology, Biochemistry, Genetics and Molecular Biology, Biochemistry, Genetics and Molecular Biology, Biochemistry, Genetics and Molecular Biology, Biochemistry, Genetics and Molecular Biology, Biochemistry, Genetics and Molecular Biology, Biochemistry, Genetics and Molecular Biology	A rapid and sensitive method for the quantitation of microgram quantities of protein utilizing the principle of protein-dye binding	Glutathione Peroxidase	Bradford M.M.	Wendel A.	0
504	10.1016/0003-2697(76)90527-3	10.1016/0003-2697(82)90118-X	594	Biochemistry, Genetics and Molecular Biology, Biochemistry, Genetics and Molecular Biology, Biochemistry, Genetics and Molecular Biology, Biochemistry, Genetics and Molecular Biology, Biochemistry, Genetics and Molecular Biology, Biochemistry, Genetics and Molecular Biology, Biochemistry, Genetics and Molecular Biology, Biochemistry, Genetics and Molecular Biology, Biochemistry, Genetics and Mole…	Biochemistry, Genetics and Molecular Biology, Biochemistry, Genetics and Molecular Biology, Biochemistry, Genetics and Molecular Biology, Biochemistry, Genetics and Molecular Biology, Biochemistry, Genetics and Molecular Biology, Biochemistry, Genetics and Molecular Biology, Biochemistry, Genetics and Molecular Biology, Biochemistry, Genetics and Molecular Biology, Biochemistry, Genetics and Mole…	A rapid and sensitive method for the quantitation of microgram quantities of protein utilizing the principle of protein-dye binding	Analysis of nitrate, nitrite, and [15N]nitrate in biological fluids	Bradford M.M., Bradford M.M., Bradford M.M., Bradford M.M., Bradford M.M., Bradford M.M.	Tannenbaum S.R., Wishnok J.S., Skipper P.L., Glogowski J., Wagner D.A., Green L.C.	0
505	10.1016/0003-2697(76)90527-3	10.1016/0003-2697(84)90039-3	238	Biochemistry, Genetics and Molecular Biology, Biochemistry, Genetics and Molecular Biology, Biochemistry, Genetics and Molecular Biology, Biochemistry, Genetics and Molecular Biology, Biochemistry, Genetics and Molecular Biology, Biochemistry, Genetics and Molecular Biology, Biochemistry, Genetics and Molecular Biology, Biochemistry, Genetics and Molecular Biology, Biochemistry, Genetics and Mole…	Biochemistry, Genetics and Molecular Biology, Biochemistry, Genetics and Molecular Biology, Biochemistry, Genetics and Molecular Biology, Biochemistry, Genetics and Molecular Biology, Biochemistry, Genetics and Molecular Biology, Biochemistry, Genetics and Molecular Biology, Biochemistry, Genetics and Molecular Biology, Biochemistry, Genetics and Molecular Biology, Biochemistry, Genetics and Mole…	A rapid and sensitive method for the quantitation of microgram quantities of protein utilizing the principle of protein-dye binding	Estimation of hydrogen peroxide in plant extracts using titanium(IV)	Bradford M.M., Bradford M.M., Bradford M.M.	Ferguson I.B., MacRae E.A., Patterson B.D.	0
506	10.1016/0003-2697(76)90527-3	10.1016/0003-2697(86)90640-8	451	Biochemistry, Genetics and Molecular Biology, Biochemistry, Genetics and Molecular Biology, Biochemistry, Genetics and Molecular Biology, Biochemistry, Genetics and Molecular Biology, Biochemistry, Genetics and Molecular Biology, Biochemistry, Genetics and Molecular Biology, Biochemistry, Genetics and Molecular Biology, Biochemistry, Genetics and Molecular Biology, Biochemistry, Genetics and Mole…	Biochemistry, Genetics and Molecular Biology, Biochemistry, Genetics and Molecular Biology, Biochemistry, Genetics and Molecular Biology, Biochemistry, Genetics and Molecular Biology, Biochemistry, Genetics and Molecular Biology, Biochemistry, Genetics and Molecular Biology, Biochemistry, Genetics and Molecular Biology, Biochemistry, Genetics and Molecular Biology, Biochemistry, Genetics and Mole…	A rapid and sensitive method for the quantitation of microgram quantities of protein utilizing the principle of protein-dye binding	A direct colorimetric assay for Ca2+-stimulated ATPase activity	Bradford M.M., Bradford M.M., Bradford M.M.	Chan K.-M., Delfert D., Junger K.D.	0
507	10.1016/0003-2697(76)90527-3	10.1016/0014-4827(88)90265-0	367	Biochemistry, Genetics and Molecular Biology, Biochemistry, Genetics and Molecular Biology, Biochemistry, Genetics and Molecular Biology, Biochemistry, Genetics and Molecular Biology	Biochemistry, Genetics and Molecular Biology, Biochemistry, Genetics and Molecular Biology, Biochemistry, Genetics and Molecular Biology, Biochemistry, Genetics and Molecular Biology	A rapid and sensitive method for the quantitation of microgram quantities of protein utilizing the principle of protein-dye binding	A simple technique for quantitation of low levels of DNA damage in individual cells	Bradford M.M., Bradford M.M., Bradford M.M., Bradford M.M.	Tice R.R., McCoy M.T., Singh N.P., Schneider E.L.	0
508	10.1016/0003-2697(76)90527-3		241	Biochemistry, Genetics and Molecular Biology, Biochemistry, Genetics and Molecular Biology, Biochemistry, Genetics and Molecular Biology, Biochemistry, Genetics and Molecular Biology	Biochemistry, Genetics and Molecular Biology, Biochemistry, Genetics and Molecular Biology, Biochemistry, Genetics and Molecular Biology, Biochemistry, Genetics and Molecular Biology	A rapid and sensitive method for the quantitation of microgram quantities of protein utilizing the principle of protein-dye binding	A simple method for clinical assay of superoxide dismutase	Bradford M.M., Bradford M.M., Bradford M.M.	Oberley L.W., Li Y., Sun Y.	0
509	10.1016/0003-2697(76)90527-3	10.1111/j.1399-3054.1983.tb04162.x	187	Biochemistry, Genetics and Molecular Biology, Biochemistry, Genetics and Molecular Biology, Biochemistry, Genetics and Molecular Biology, Biochemistry, Genetics and Molecular Biology, Biochemistry, Genetics and Molecular Biology, Biochemistry, Genetics and Molecular Biology, Biochemistry, Genetics and Molecular Biology, Biochemistry, Genetics and Molecular Biology, Biochemistry, Genetics and Mole…	Biochemistry, Genetics and Molecular Biology, Agricultural and Biological Sciences, Biochemistry, Genetics and Molecular Biology, Biochemistry, Genetics and Molecular Biology, Biochemistry, Genetics and Molecular Biology, Agricultural and Biological Sciences, Biochemistry, Genetics and Molecular Biology, Biochemistry, Genetics and Molecular Biology, Biochemistry, Genetics and Molecular Biology, A…	A rapid and sensitive method for the quantitation of microgram quantities of protein utilizing the principle of protein-dye binding	Implications of water stress‐induced changes in the levels of endogenous ascorbic acid and hydrogen peroxide in Vigna seedlings	Bradford M.M., Bradford M.M.	Mukherjee S.P., Choudhuri M.A.	0
510	10.2307/350547	10.1177/014662167700100306	306	Arts and Humanities, Social Sciences, Arts and Humanities, Social Sciences, Social Sciences, Social Sciences	Social Sciences, Psychology, Psychology, Psychology, Social Sciences, Social Sciences	Measuring Dyadic Adjustment: new scales for assessing the quality of marriage and similar dyads	The CES-D Scale: A Self-Report Depression Scale for Research in the General Population	Spanier G.B.	Radloff L.S.	0
511	10.1016/0002-9149(76)90491-4	10.1161/01.CIR.58.6.1072	382	Medicine, Medicine	Medicine, Medicine	Problems in echocardiographic volume determinations: echocardiographic angiographic correlations in the presence or absence of asynergy	Recommendations regarding quantitation in M-mode echocardiography: Results of a survey of echocardiographic measurements	Gorlin R., Herman M.V., Kreulen T., Evan Teichholz L., Gorlin R., Herman M.V., Kreulen T., Evan Teichholz L., Gorlin R., Herman M.V., Kreulen T., Evan Teichholz L., Gorlin R., Herman M.V., Kreulen T., Evan Teichholz L.	DeMaria A., DeMaria A., DeMaria A., DeMaria A., Kisslo J., Kisslo J., Kisslo J., Kisslo J., Weyman A., Weyman A., Weyman A., Weyman A., Sahn D.J., Sahn D.J., Sahn D.J., Sahn D.J.	0
512	10.1016/0002-9149(76)90491-4	10.1016/0002-9149(86)90771-X	217	Medicine	Medicine	Problems in echocardiographic volume determinations: echocardiographic angiographic correlations in the presence or absence of asynergy	Echocardiographic assessment of left ventricular hypertrophy: Comparison to necropsy findings	Gorlin R., Herman M.V., Kreulen T., Evan Teichholz L., Gorlin R., Herman M.V., Kreulen T., Evan Teichholz L., Gorlin R., Herman M.V., Kreulen T., Evan Teichholz L., Gorlin R., Herman M.V., Kreulen T., Evan Teichholz L., Gorlin R., Herman M.V., Kreulen T., Evan Teichholz L., Gorlin R., Herman M.V., Kreulen T., Evan Teichholz L., Gorlin R., Herman M.V., Kreulen T., Evan Teichholz L.	Lutas E.M., Lutas E.M., Lutas E.M., Lutas E.M., Campo E., Campo E., Campo E., Campo E., Sachs I., Sachs I., Sachs I., Sachs I., Devereux R.B., Devereux R.B., Devereux R.B., Devereux R.B., Alonso D.R., Alonso D.R., Alonso D.R., Alonso D.R., Reichek N., Reichek N., Reichek N., Reichek N., Gottlieb G.J., Gottlieb G.J., Gottlieb G.J., Gottlieb G.J.	0
513	10.1126/science.781840	10.1016/0022-1759(83)90303-4	188	General, General	Medicine, Immunology and Microbiology	Human malaria parasites in continuous culture	Rapid colorimetric assay for cellular growth and survival: Application to proliferation and cytotoxicity assays	Jensen J.B., Trager W.	Mosmann T., Mosmann T.	0
514	10.2106/00004623-197759010-00013		174	Medicine, Medicine, Medicine, Medicine	Medicine, Medicine, Medicine, Medicine	Influence of positioning of prosthesis in total knee replacement	Coronal alignment after total knee replacement	Ecker M.L., Lotke P.A., Ecker M.L., Lotke P.A., Ecker M.L., Lotke P.A.	Jeffery R.S., Jeffery R.S., Denham R.A., Denham R.A., Morris R.W., Morris R.W.	0
515	10.2307/2529310	10.1126/science.3287615	143	Biochemistry, Genetics and Molecular Biology, Immunology and Microbiology, Mathematics, Mathematics, Agricultural and Biological Sciences	General, General, General, General, General	The measurement of observer agreement for categorical data	Measuring the accuracy of diagnostic systems	Landis J.R., Koch G.G.	Swets J.A., Swets J.A.	0
516	10.1099/00207713-27-2-104	10.1016/0167-7012(84)90018-6	239	Immunology and Microbiology, Immunology and Microbiology, Immunology and Microbiology, Immunology and Microbiology, Immunology and Microbiology, Immunology and Microbiology	Immunology and Microbiology, Biochemistry, Genetics and Molecular Biology, Medicine, Immunology and Microbiology, Biochemistry, Genetics and Molecular Biology, Medicine	Polar lipid composition in the classification of Nocardia and related bacteria	An integrated procedure for the extraction of bacterial isoprenoid quinones and polar lipids	Alshamaony L., Minnikin D.E., Goodfellow M., Patel P.V., Alshamaony L., Minnikin D.E., Goodfellow M., Patel P.V., Alshamaony L., Minnikin D.E., Goodfellow M., Patel P.V., Alshamaony L., Minnikin D.E., Goodfellow M., Patel P.V., Alshamaony L., Minnikin D.E., Goodfellow M., Patel P.V., Alshamaony L., Minnikin D.E., Goodfellow M., Patel P.V., Alshamaony L., Minnikin D.E., Goodfellow M., Patel P.V.	O'Donnell A.G., O'Donnell A.G., O'Donnell A.G., O'Donnell A.G., Minnikin D.E., Minnikin D.E., Minnikin D.E., Minnikin D.E., Schaal A., Schaal A., Schaal A., Schaal A., Athalye M., Athalye M., Athalye M., Athalye M., Parlett J.H., Parlett J.H., Parlett J.H., Parlett J.H., Alderson G., Alderson G., Alderson G., Alderson G., Goodfellow M., Goodfellow M., Goodfellow M., Goodfellow M.	1
517	10.1099/00207713-27-2-104	10.1099/00207713-39-3-224	217	Immunology and Microbiology, Immunology and Microbiology, Immunology and Microbiology, Immunology and Microbiology	Immunology and Microbiology, Immunology and Microbiology, Immunology and Microbiology, Immunology and Microbiology	Polar lipid composition in the classification of Nocardia and related bacteria	Fluorometric deoxyribonucleic acid-deoxyribonucleic acid hybridization in microdilution wells as an alternative to membrane filter hybridization in which radioisotopes are used to determine genetic relatedness among bacterial strains	Alshamaony L., Minnikin D.E., Goodfellow M., Patel P.V., Alshamaony L., Minnikin D.E., Goodfellow M., Patel P.V., Alshamaony L., Minnikin D.E., Goodfellow M., Patel P.V.	Yabuuchi E., Yabuuchi E., Yabuuchi E., Yabuuchi E., Ezaki T., Ezaki T., Ezaki T., Ezaki T., Hashimoto Y., Hashimoto Y., Hashimoto Y., Hashimoto Y.	0
518	10.1038/267673a0	10.1016/0167-2738(84)90049-3	106	General, General, General	Materials Science, Chemistry, Physics and Astronomy	The 'universal' dielectric response	Note on the parameterization of the constant-phase admittance element	Jonscher A.K.	Ross Macdonald J.	1
519	10.1038/267673a0	10.1063/1.344049	148	General	Physics and Astronomy	The 'universal' dielectric response	Impedance and modulus spectroscopy of semiconducting BaTiO3 showing positive temperature coefficient of resistance	Jonscher A.K., Jonscher A.K.	Sinclair D.C., West A.R.	0
520	10.1080/00207547708943107	10.1111/j.1540-5915.1988.tb00264.x	310	Engineering, Decision Sciences, Decision Sciences, Decision Sciences, Decision Sciences, Business, Management and Accounting, Business, Management and Accounting, Business, Management and Accounting, Business, Management and Accounting, Engineering, Engineering, Engineering	Business, Management and Accounting, Decision Sciences, Business, Management and Accounting, Business, Management and Accounting, Business, Management and Accounting, Business, Management and Accounting, Decision Sciences, Business, Management and Accounting, Business, Management and Accounting, Decision Sciences, Business, Management and Accounting, Business, Management and Accounting	An integrated inventory model for a single supplier-single customer problem	“A JOINT ECONOMIC‐LOT‐SIZE MODEL FOR PURCHASER AND VENDOR”: A COMMENT	Goyal S.K.	Goyal S.K.	1
521	10.1115/1.3443401	10.1016/0013-7944(85)90052-9	267	Engineering, Physics and Astronomy, Physics and Astronomy, Materials Science, Materials Science, Engineering, Engineering, Engineering	Engineering, Engineering, Engineering, Engineering, Engineering, Engineering, Engineering, Engineering	Continuum theory of ductile rupture by void nucleation and growth: Part 1 - yield criteria and flow rules for porous ductile media	Fracture characteristics of three metals subjected to various strains, strain rates, temperatures and pressures	Gurson A.L., Gurson A.L.	Johnson G.R., Cook W.H.	0
522	10.1016/0021-9991(77)90100-0	10.1016/0021-9991(72)90065-4	243	Physics and Astronomy, Physics and Astronomy, Computer Science, Computer Science	Computer Science, Physics and Astronomy, Physics and Astronomy, Computer Science	Numerical analysis of blood flow in the heart	Flow patterns around heart valves: A numerical method	Peskin C.S.	Peskin C.S.	1
523	10.1037/0033-295X.84.2.191	10.1177/014662167700100306	240	Psychology, Psychology	Social Sciences, Psychology	Self-efficacy: Toward a unifying theory of behavioral change	The CES-D Scale: A Self-Report Depression Scale for Research in the General Population	Bandura A.	Radloff L.S.	0
524	10.2136/sssaj1977.03615995004100050005x	10.1139/t79-003	209	Agricultural and Biological Sciences	Engineering	SHEAR RESISTANCE OF ROOT-PERMEATED HOMOGENEOUS AND STRATIFIED SOIL.	STRENGTH OF TREE ROOTS AND LANDSLIDES ON PRICE OF WALES ISLAND, ALASKA.	Waldron L.J., Waldron L.J., Waldron L.J.	Swanston Douglas N., Wu Tien H., McKinnell III William P.	0
525	10.1007/BF01261801	10.1016/0148-9062(83)90595-8	222	Earth and Planetary Sciences, Earth and Planetary Sciences, Earth and Planetary Sciences, Earth and Planetary Sciences, Earth and Planetary Sciences, Earth and Planetary Sciences, Environmental Science, Environmental Science, Engineering, Engineering	Earth and Planetary Sciences, Engineering, Engineering, Earth and Planetary Sciences, Earth and Planetary Sciences, Engineering, Engineering, Earth and Planetary Sciences, Engineering, Earth and Planetary Sciences	The shear strength of rock joints in theory and practice	Fundamentals of rock joint deformation	Barton N., Choubey V., Barton N., Choubey V., Barton N., Choubey V.	Barton N.R., Barton N.R., Bandis S.C., Bandis S.C., Lumsden A.C., Lumsden A.C.	1
526	10.1038/266730a0	10.1007/BF00428203	416	Medicine, General	Pharmacology, Toxicology and Pharmaceutics, Pharmacology, Toxicology and Pharmaceutics	Depression: A new animal model sensitive to antidepressant treatments [27]	The tail suspension test: A new method for screening antidepressants in mice	Jalfre M., Le Pichon M., Porsolt R.D., Jalfre M., Le Pichon M., Porsolt R.D., Jalfre M., Le Pichon M., Porsolt R.D., Jalfre M., Le Pichon M., Porsolt R.D.	Steru L., Steru L., Steru L., Thierry B., Thierry B., Thierry B., Simon P., Simon P., Simon P., Chermat R., Chermat R., Chermat R.	0
527	10.1176/ajp.134.11.1227		144	Medicine, Medicine	Medicine, Pharmacology, Toxicology and Pharmaceutics	Cyclothymic disorder: Validating criteria for inclusion in the bipolar affective group	Criteria for the 'soft' bipolar spectrum: Treatment implications	Rosenthal R.H., Akiskal H.S., Djenderedjian A.H., Khani M.K., Rosenthal R.H., Akiskal H.S., Djenderedjian A.H., Khani M.K.	Mallya G., Mallya G., Mallya G., Mallya G., Akiskal H.S., Akiskal H.S., Akiskal H.S., Akiskal H.S.	0
528	10.1073/pnas.74.12.5463	10.1016/0003-2697(80)90515-1	129	General, General, General, General	Biochemistry, Genetics and Molecular Biology, Biochemistry, Genetics and Molecular Biology, Biochemistry, Genetics and Molecular Biology, Biochemistry, Genetics and Molecular Biology	DNA sequencing with chain-terminating inhibitors.	LIGAND: A versatile computerized approach for characterization of ligand-binding systems	Coulson A.R., Sanger F., Nicklen S., Coulson A.R., Sanger F., Nicklen S.	Munson P.J., Munson P.J., Munson P.J., Rodbard D., Rodbard D., Rodbard D.	0
529	10.1099/00221287-100-2-221		114	Immunology and Microbiology	Immunology and Microbiology	Distribution of menaquinones in actinomycetes and corynebacteria	Numerical classification of Streptomyces and related genera	Pirouz T., Collins M.D., Minnikin D.E., Goodfellow M., Pirouz T., Collins M.D., Minnikin D.E., Goodfellow M., Pirouz T., Collins M.D., Minnikin D.E., Goodfellow M., Pirouz T., Collins M.D., Minnikin D.E., Goodfellow M., Pirouz T., Collins M.D., Minnikin D.E., Goodfellow M., Pirouz T., Collins M.D., Minnikin D.E., Goodfellow M.	Goodfellow M., Goodfellow M., Goodfellow M., Goodfellow M., Williams S.T., Williams S.T., Williams S.T., Williams S.T., Alderson G., Alderson G., Alderson G., Alderson G., Wellington E.M., Wellington E.M., Wellington E.M., Wellington E.M., Sneath P.H., Sneath P.H., Sneath P.H., Sneath P.H., Sackin M.J., Sackin M.J., Sackin M.J., Sackin M.J.	0
530	10.1099/00221287-100-2-221	10.1111/j.1365-2672.1983.tb01297.x	266	Immunology and Microbiology, Immunology and Microbiology	Immunology and Microbiology, Immunology and Microbiology	Distribution of menaquinones in actinomycetes and corynebacteria	Analysis of bacterial menaquinone mixtures by high performance liquid chromatography	Pirouz T., Collins M.D., Minnikin D.E., Goodfellow M., Pirouz T., Collins M.D., Minnikin D.E., Goodfellow M., Pirouz T., Collins M.D., Minnikin D.E., Goodfellow M.	Tamaoka J., Tamaoka J., Tamaoka J., Tamaoka J., Katayama-Fujimura Y., Katayama-Fujimura Y., Katayama-Fujimura Y., Katayama-Fujimura Y., Kuraishi H., Kuraishi H., Kuraishi H., Kuraishi H.	1
531	10.1099/00221287-100-2-221	10.1016/0167-7012(84)90018-6	407	Immunology and Microbiology, Immunology and Microbiology, Immunology and Microbiology	Biochemistry, Genetics and Molecular Biology, Immunology and Microbiology, Medicine	Distribution of menaquinones in actinomycetes and corynebacteria	An integrated procedure for the extraction of bacterial isoprenoid quinones and polar lipids	Pirouz T., Collins M.D., Minnikin D.E., Goodfellow M., Pirouz T., Collins M.D., Minnikin D.E., Goodfellow M., Pirouz T., Collins M.D., Minnikin D.E., Goodfellow M., Pirouz T., Collins M.D., Minnikin D.E., Goodfellow M., Pirouz T., Collins M.D., Minnikin D.E., Goodfellow M., Pirouz T., Collins M.D., Minnikin D.E., Goodfellow M., Pirouz T., Collins M.D., Minnikin D.E., Goodfellow M.	Schaal A., Schaal A., Schaal A., Schaal A., Athalye M., Athalye M., Athalye M., Athalye M., Minnikin D.E., Minnikin D.E., Minnikin D.E., Minnikin D.E., O'Donnell A.G., O'Donnell A.G., O'Donnell A.G., O'Donnell A.G., Goodfellow M., Goodfellow M., Goodfellow M., Goodfellow M., Parlett J.H., Parlett J.H., Parlett J.H., Parlett J.H., Alderson G., Alderson G., Alderson G., Alderson G.	1
532	10.1099/00221287-100-2-221	10.1016/0378-1097(84)90059-4	211	Immunology and Microbiology, Immunology and Microbiology, Immunology and Microbiology	Biochemistry, Genetics and Molecular Biology, Immunology and Microbiology, Biochemistry, Genetics and Molecular Biology	Distribution of menaquinones in actinomycetes and corynebacteria	Determination of DNA base composition by reversed-phase high-performance liquid chromatography	Pirouz T., Collins M.D., Minnikin D.E., Goodfellow M., Pirouz T., Collins M.D., Minnikin D.E., Goodfellow M.	Tamaoka J., Tamaoka J., Tamaoka J., Tamaoka J., Komagata K., Komagata K., Komagata K., Komagata K.	0
533	10.1099/00221287-100-2-221	10.1099/00207713-39-3-224	399	Immunology and Microbiology, Immunology and Microbiology	Immunology and Microbiology, Immunology and Microbiology	Distribution of menaquinones in actinomycetes and corynebacteria	Fluorometric deoxyribonucleic acid-deoxyribonucleic acid hybridization in microdilution wells as an alternative to membrane filter hybridization in which radioisotopes are used to determine genetic relatedness among bacterial strains	Pirouz T., Collins M.D., Minnikin D.E., Goodfellow M., Pirouz T., Collins M.D., Minnikin D.E., Goodfellow M., Pirouz T., Collins M.D., Minnikin D.E., Goodfellow M.	Hashimoto Y., Hashimoto Y., Hashimoto Y., Hashimoto Y., Ezaki T., Ezaki T., Ezaki T., Ezaki T., Yabuuchi E., Yabuuchi E., Yabuuchi E., Yabuuchi E.	0
534	10.3758/BF03198740	10.3758/BF03337021	246	Psychology, Neuroscience, Psychology, Psychology, Neuroscience, Psychology	Chemical Engineering, Chemistry, Chemistry, Chemistry, Chemical Engineering, Chemical Engineering	Recognizing the sex of a walker from a dynamic point-light display	Recognizing friends by their walk: Gait perception without familiarity cues	Cutting J.E., Kozlowski L.T., Cutting J.E., Kozlowski L.T.	Kozlowski L.T., Kozlowski L.T., Cutting J.E., Cutting J.E.	1
535	10.1016/0003-2697(77)90197-X	10.1017/S0022029900032519	239	Biochemistry, Genetics and Molecular Biology, Biochemistry, Genetics and Molecular Biology, Biochemistry, Genetics and Molecular Biology, Biochemistry, Genetics and Molecular Biology, Biochemistry, Genetics and Molecular Biology, Biochemistry, Genetics and Molecular Biology	Agricultural and Biological Sciences, Agricultural and Biological Sciences, Agricultural and Biological Sciences, Agricultural and Biological Sciences, Agricultural and Biological Sciences, Agricultural and Biological Sciences	A new staining technique for proteins in polyacrylamide gels using Coomassie brilliant blue G250	Proteinases in normal bovine milk and their action on caseins	Boezi J.A., Blakesley R.W.	Andrews A.T., Andrews A.T.	0
536	10.1016/0003-2697(77)90720-5	10.1016/S0723-2020(83)80048-4	626	Biochemistry, Genetics and Molecular Biology, Biochemistry, Genetics and Molecular Biology, Biochemistry, Genetics and Molecular Biology, Biochemistry, Genetics and Molecular Biology, Biochemistry, Genetics and Molecular Biology, Biochemistry, Genetics and Molecular Biology, Biochemistry, Genetics and Molecular Biology, Biochemistry, Genetics and Molecular Biology, Biochemistry, Genetics and Mole…	Agricultural and Biological Sciences, Agricultural and Biological Sciences, Immunology and Microbiology, Immunology and Microbiology, Agricultural and Biological Sciences, Immunology and Microbiology, Immunology and Microbiology, Immunology and Microbiology, Immunology and Microbiology, Agricultural and Biological Sciences, Immunology and Microbiology, Immunology and Microbiology	A rapid method for the base ratio determination of bacterial DNA	Studies on the spectrophotometric determination of DNA hybridization from renaturation rates	Holder-Franklin M.A., Cashion P., Franklin M., McCully J., Holder-Franklin M.A., Cashion P., Franklin M., McCully J., Holder-Franklin M.A., Cashion P., Franklin M., McCully J.	Festl H., Festl H., Festl H., Festl H., Huss V.A.R., Huss V.A.R., Huss V.A.R., Huss V.A.R., Schleifer K.H., Schleifer K.H., Schleifer K.H., Schleifer K.H.	0
537	10.1016/0003-2697(77)90720-5	10.1016/0378-1097(84)90059-4	235	Biochemistry, Genetics and Molecular Biology, Biochemistry, Genetics and Molecular Biology, Biochemistry, Genetics and Molecular Biology, Biochemistry, Genetics and Molecular Biology, Biochemistry, Genetics and Molecular Biology, Biochemistry, Genetics and Molecular Biology, Biochemistry, Genetics and Molecular Biology, Biochemistry, Genetics and Molecular Biology, Biochemistry, Genetics and Mole…	Biochemistry, Genetics and Molecular Biology, Immunology and Microbiology, Biochemistry, Genetics and Molecular Biology, Biochemistry, Genetics and Molecular Biology, Immunology and Microbiology, Biochemistry, Genetics and Molecular Biology, Immunology and Microbiology, Biochemistry, Genetics and Molecular Biology, Biochemistry, Genetics and Molecular Biology, Immunology and Microbiology, Biochem…	A rapid method for the base ratio determination of bacterial DNA	Determination of DNA base composition by reversed-phase high-performance liquid chromatography	Holder-Franklin M.A., Cashion P., Franklin M., McCully J., Holder-Franklin M.A., Cashion P., Franklin M., McCully J.	Komagata K., Komagata K., Komagata K., Komagata K., Tamaoka J., Tamaoka J., Tamaoka J., Tamaoka J.	0
538	10.1126/science.198.4312.75	10.1111/j.1467-8624.1979.tb04124.x	105	General, General, General	Social Sciences, Psychology, Medicine	Imitation of Facial and Manual Gestures by Human Neonates	Matching behavior in the young infant.	Moore M.K., Meltzoff A.N.	Jacobson S.W., Jacobson S.W.	0
539	10.1126/science.199.4335.1302	10.1038/242344a0	373	General	General	Diversity in tropical rain forests and coral reefs	Competitive exclusion in herbaceous vegetation	Connell J.H.	Grime J.P.	0
540	10.1016/S0022-3476(78)80282-0	10.1097/00000658-197801000-00001	511	Medicine	Medicine	Incidence and evolution of subependymal and intraventricular hemorrhage: A study of infants with birth weights less than 1,500 gm	Neonatal necrotizing enterocolitis. Therapeutic decisions based upon clinical staging.	Papile L.-A., Burstein J., Burstein R., Koffler H., Papile L.-A., Burstein J., Burstein R., Koffler H., Papile L.-A., Burstein J., Burstein R., Koffler H., Papile L.-A., Burstein J., Burstein R., Koffler H., Papile L.-A., Burstein J., Burstein R., Koffler H., Papile L.-A., Burstein J., Burstein R., Koffler H., Papile L.-A., Burstein J., Burstein R., Koffler H.	Feigin R.D., Feigin R.D., Feigin R.D., Feigin R.D., Marshall R., Marshall R., Marshall R., Marshall R., Keating J.P., Keating J.P., Keating J.P., Keating J.P., Barton L., Barton L., Barton L., Barton L., Ternberg J.L., Ternberg J.L., Ternberg J.L., Ternberg J.L., Bell M.J., Bell M.J., Bell M.J., Bell M.J., Brotherton T., Brotherton T., Brotherton T., Brotherton T.	0
541	10.2106/00004623-197860020-00014	10.2106/00004623-198264090-00004	256	Medicine, Medicine, Medicine, Medicine	Medicine, Medicine, Medicine, Medicine	Dislocations after total hip-replacement arthroplasties	Dislocations after total hip arthroplasty	Lewinnek G.E., Zimmerman J.R., Tarr R., Lewis J.L., Compere C.L., Lewinnek G.E., Zimmerman J.R., Tarr R., Lewis J.L., Compere C.L.	Woo R.Y.G., Woo R.Y.G., Woo R.Y.G., Woo R.Y.G., Woo R.Y.G., Morrey B.F., Morrey B.F., Morrey B.F., Morrey B.F., Morrey B.F.	0
542	10.1016/S0076-6879(78)52032-6	10.1016/0304-4165(79)90289-7	191	Biochemistry, Genetics and Molecular Biology, Biochemistry, Genetics and Molecular Biology, Biochemistry, Genetics and Molecular Biology, Biochemistry, Genetics and Molecular Biology, Biochemistry, Genetics and Molecular Biology, Biochemistry, Genetics and Molecular Biology	Biochemistry, Genetics and Molecular Biology, Biochemistry, Genetics and Molecular Biology, Biochemistry, Genetics and Molecular Biology, Biochemistry, Genetics and Molecular Biology, Biochemistry, Genetics and Molecular Biology, Biochemistry, Genetics and Molecular Biology	Microsomal Lipid Peroxidation	Levels of glutathione, glutathione reductase and glutathione S-transferase activities in rat lung and liver	Buege J.A., Aust S.D., Buege J.A., Aust S.D., Buege J.A., Aust S.D.	Moron M.S., Moron M.S., Mannervik B., Mannervik B., Depierre J.W., Depierre J.W.	0
543	10.1016/S0076-6879(78)52032-6	10.1016/S0076-6879(84)05015-1	288	Biochemistry, Genetics and Molecular Biology, Biochemistry, Genetics and Molecular Biology, Biochemistry, Genetics and Molecular Biology, Biochemistry, Genetics and Molecular Biology	Biochemistry, Genetics and Molecular Biology, Biochemistry, Genetics and Molecular Biology, Biochemistry, Genetics and Molecular Biology, Biochemistry, Genetics and Molecular Biology	Microsomal Lipid Peroxidation	[12] Assays of Glutathione Peroxidase	Buege J.A., Aust S.D., Buege J.A., Aust S.D.	Flohe L., Flohe L., Gunzler W.A., Gunzler W.A.	0
544	10.1016/S0076-6879(78)52032-6	10.1016/0163-7258(88)90027-7	103	Biochemistry, Genetics and Molecular Biology, Biochemistry, Genetics and Molecular Biology, Biochemistry, Genetics and Molecular Biology, Biochemistry, Genetics and Molecular Biology	Pharmacology, Toxicology and Pharmaceutics, Medicine, Medicine, Pharmacology, Toxicology and Pharmaceutics	Microsomal Lipid Peroxidation	Glutathione, free radicals and chemotherapeutic agents. Mechanisms of free-radical induced toxicity and glutathione-dependent protection	Buege J.A., Aust S.D.	Ross D., Ross D.	0
545	10.1109/TPAMI.1979.4766909	10.1109/34.85677	306	Computer Science, Computer Science, Computer Science, Computer Science, Computer Science, Mathematics, Mathematics, Computer Science, Computer Science, Computer Science, Mathematics, Computer Science, Computer Science, Computer Science, Mathematics, Computer Science, Computer Science, Computer Science, Computer Science, Computer Science	Engineering, Computer Science, Computer Science, Engineering, Computer Science, Engineering, Engineering, Computer Science, Engineering, Engineering, Computer Science, Engineering, Engineering, Computer Science, Computer Science, Computer Science, Computer Science, Engineering, Engineering, Computer Science	A Cluster Separation Measure	A validity measure for fuzzy clustering	Bouldin D.W., Davies D.L., Bouldin D.W., Davies D.L.	Beni Gerardo, Beni Gerardo, Xie Xuanli Lisa, Xie Xuanli Lisa	0
546	10.1109/TPAMI.1979.4766909	10.1007/BF02294245	187	Computer Science, Computer Science, Computer Science, Mathematics, Computer Science, Computer Science, Computer Science, Computer Science, Mathematics, Computer Science	Mathematics, Psychology, Mathematics, Mathematics, Psychology, Psychology, Mathematics, Mathematics, Psychology, Psychology	A Cluster Separation Measure	An examination of procedures for determining the number of clusters in a data set	Bouldin D.W., Davies D.L., Bouldin D.W., Davies D.L.	Cooper M.C., Cooper M.C., Milligan G.W., Milligan G.W.	1
547	10.1109/TPAMI.1979.4766909	10.1080/01969727408546059	548	Mathematics, Mathematics, Computer Science, Computer Science, Computer Science, Computer Science, Computer Science, Computer Science, Mathematics, Computer Science, Computer Science, Computer Science, Computer Science, Computer Science, Computer Science, Computer Science, Computer Science, Mathematics, Computer Science, Computer Science	Computer Science, Engineering, Computer Science, Engineering, Computer Science, Computer Science, Computer Science, Engineering, Computer Science, Computer Science, Computer Science, Computer Science, Computer Science, Computer Science, Engineering, Computer Science, Computer Science, Computer Science, Engineering, Computer Science	A Cluster Separation Measure	Well-separated clusters and optimal fuzzy partitions	Bouldin D.W., Davies D.L.	Dunn J.C., Dunn J.C.	0
548	10.1109/TPAMI.1979.4766909	10.1080/03610927408827101	402	Mathematics, Computer Science, Computer Science, Computer Science, Computer Science	Mathematics, Mathematics, Mathematics, Mathematics, Mathematics	A Cluster Separation Measure	A Dendrite Method Foe Cluster Analysis	Bouldin D.W., Davies D.L., Bouldin D.W., Davies D.L.	Harabasz J., Harabasz J., Calinski T., Calinski T.	0
549	10.1109/TIT.1978.1055892	10.1109/TIT.1978.1055917	686	Computer Science, Social Sciences, Computer Science, Computer Science, Computer Science, Computer Science, Computer Science, Engineering, Social Sciences, Social Sciences, Engineering, Engineering	Computer Science, Computer Science, Computer Science, Social Sciences, Computer Science, Computer Science, Social Sciences, Computer Science, Social Sciences, Computer Science, Computer Science, Social Sciences	Broadcast Channels with Confidential Messages	The Gaussian Wire-Tap Channel	Korner J., Csiszar I., Korner J., Csiszar I.	Hellman M.E., Hellman M.E., Leung-Yan-Cheong S.K., Leung-Yan-Cheong S.K.	0
550	10.1109/TIT.1978.1055892	10.1109/18.243431	228	Computer Science, Engineering, Social Sciences, Computer Science, Social Sciences, Engineering, Engineering, Social Sciences, Computer Science, Computer Science, Computer Science, Computer Science	Computer Science, Social Sciences, Social Sciences, Social Sciences, Computer Science, Computer Science, Computer Science, Computer Science, Social Sciences, Computer Science, Computer Science, Computer Science	Broadcast Channels with Confidential Messages	Common Randomness in Information Theory and Cryptography—Part I: Secret Sharing	Korner J., Csiszar I.	Ahlswede R., Ahlswede R.	1
551	10.1149/1.2131532	10.1039/F19837902027	171	Chemistry, Energy, Materials Science, Materials Science, Materials Science	Chemistry, Chemistry, Chemistry, Chemistry, Chemistry	Photooxidation of Water at α -Fe2O3 Electrodes	Electrochemistry and photoelectrochemistry of iron(III) oxide	Kennedy J.H., Frese K.W., Kennedy J.H., Frese K.W., Kennedy J.H., Frese K.W., Kennedy J.H., Frese K.W.	Dare-Edwards M.P., Dare-Edwards M.P., Hamnett A., Hamnett A., Goodenough J.B., Goodenough J.B., Trevellick P.R., Trevellick P.R.	1
552	10.2307/2392563	10.1037/0022-3514.51.6.1173	163	Arts and Humanities, Social Sciences, Social Sciences, Social Sciences, Arts and Humanities, Social Sciences	Social Sciences, Psychology, Psychology, Social Sciences, Psychology, Social Sciences	A social information processing approach to job attitudes and task design.	The Moderator-Mediator Variable Distinction in Social Psychological Research. Conceptual, Strategic, and Statistical Considerations	Salancik G.R., Pfeffer J., Salancik G.R., Pfeffer J.	Baron R.M., Baron R.M., Kenny D.A., Kenny D.A.	0
553			359	Engineering	Engineering	PICTURE THRESHOLDING USING AN ITERATIVE SLECTION METHOD.	THRESHOLD SELECTION METHOD FROM GRAY-LEVEL HISTOGRAMS.	Calvard S., Ridler T.W.	Otsu Nobuyuki, Otsu Nobuyuki	0
554	10.1016/0377-2217(78)90138-8	10.1016/0304-4076(77)90052-5	812	Decision Sciences, Computer Science, Computer Science, Computer Science, Decision Sciences, Decision Sciences, Decision Sciences, Decision Sciences, Decision Sciences, Mathematics, Mathematics, Mathematics	Economics, Econometrics and Finance, Arts and Humanities, Economics, Econometrics and Finance, Mathematics, Arts and Humanities, Economics, Econometrics and Finance, Mathematics, Arts and Humanities, Mathematics, Arts and Humanities, Economics, Econometrics and Finance, Mathematics	Measuring the efficiency of decision making units	Formulation and estimation of stochastic frontier production function models	Cooper W.W., Charnes A., Rhodes E., Cooper W.W., Charnes A., Rhodes E., Cooper W.W., Charnes A., Rhodes E.	Aigner D., Aigner D., Aigner D., Lovell C.A.K., Lovell C.A.K., Lovell C.A.K., Schmidt P., Schmidt P., Schmidt P.	0
555	10.1016/0377-2217(78)90138-8	10.2307/1928055	356	Decision Sciences, Decision Sciences, Decision Sciences, Decision Sciences, Mathematics, Computer Science, Computer Science, Mathematics	Social Sciences, Economics, Econometrics and Finance, Economics, Econometrics and Finance, Social Sciences, Economics, Econometrics and Finance, Social Sciences, Economics, Econometrics and Finance, Social Sciences	Measuring the efficiency of decision making units	'Multilateral productivity comparisons when some outputs are undesirable: A nonparametric approach'	Cooper W.W., Charnes A., Rhodes E., Cooper W.W., Charnes A., Rhodes E., Cooper W.W., Charnes A., Rhodes E., Cooper W.W., Charnes A., Rhodes E.	Lovell C.A.K., Lovell C.A.K., Lovell C.A.K., Pasurka C., Pasurka C., Pasurka C., Fare R., Fare R., Fare R., Grosskopf S., Grosskopf S., Grosskopf S.	0
556	10.1016/0377-2217(78)90138-8	10.1111/j.1540-6261.1977.tb03324.x	236	Decision Sciences, Mathematics, Computer Science, Mathematics, Computer Science, Decision Sciences, Mathematics, Decision Sciences, Computer Science, Decision Sciences, Decision Sciences, Decision Sciences	Business, Management and Accounting, Economics, Econometrics and Finance, Economics, Econometrics and Finance, Economics, Econometrics and Finance, Economics, Econometrics and Finance, Business, Management and Accounting, Business, Management and Accounting, Economics, Econometrics and Finance, Business, Management and Accounting, Economics, Econometrics and Finance, Economics, Econometrics and F…	Measuring the efficiency of decision making units	INPUTS, OUTPUTS, AND A THEORY OF PRODUCTION AND COST AT DEPOSITORY FINANCIAL INSTITUTIONS	Cooper W.W., Charnes A., Rhodes E., Cooper W.W., Charnes A., Rhodes E.	Lindley J.T., Lindley J.T., Lindley J.T., Sealey C.W., Sealey C.W., Sealey C.W.	0
557	10.1037/0096-1523.4.4.565	10.1037/0096-3445.108.3.316	134	Arts and Humanities, Neuroscience, Neuroscience, Arts and Humanities, Psychology, Psychology, Neuroscience, Psychology, Arts and Humanities	Psychology, Neuroscience, Psychology, Neuroscience, Neuroscience, Psychology, Psychology, Psychology, Psychology	Cognitive determinants of fixation location during picture viewing	Framing pictures: The role of knowledge in automatized encoding and memory for gist	Mackworth N.H., Loftus G.R.	Friedman A., Friedman A.	0
558	10.1016/0025-5564(78)90006-8	10.1007/BF00276956	165	Immunology and Microbiology, Mathematics, Mathematics, Mathematics, Mathematics, Biochemistry, Genetics and Molecular Biology, Agricultural and Biological Sciences, Mathematics, Immunology and Microbiology, Immunology and Microbiology, Mathematics, Mathematics, Agricultural and Biological Sciences, Agricultural and Biological Sciences, Mathematics, Biochemistry, Genetics and Molecular Biology, Bi…	Mathematics, Agricultural and Biological Sciences, Mathematics, Mathematics, Mathematics, Agricultural and Biological Sciences, Mathematics, Agricultural and Biological Sciences, Mathematics, Agricultural and Biological Sciences, Mathematics, Mathematics, Agricultural and Biological Sciences, Mathematics, Mathematics, Mathematics, Mathematics, Agricultural and Biological Sciences	A generalization of the Kermack-McKendrick deterministic epidemic model	Influence of nonlinear incidence rates upon the behavior of SIRS epidemiological models	Capasso V., Serio G., Capasso V., Serio G., Capasso V., Serio G.	Levin S.A., Levin S.A., Liu W.-m., Liu W.-m., Iwasa Y., Iwasa Y.	1
559	10.1145/359657.359659	10.1109/TIT.1983.1056650	330	Computer Science, Computer Science, Computer Science	Social Sciences, Computer Science, Computer Science	Using Encryption for Authentication in Large Networks of Computers	On the Security of Public Key Protocols	Needham R.M., Schroeder M.D., Needham R.M., Schroeder M.D.	Dolev D., Dolev D., Yao A.C., Yao A.C.	1
560		10.1109/TSMC.1985.6313399	290	Mathematics, Mathematics, Engineering	Engineering, Engineering, Engineering	FUZZY CLUSTERING WITH A FUZZY COVARIANCE MATRIX.	Fuzzy Identification of Systems and Its Applications to Modeling and Control	Gustafson Donald E., Kessel William C., Gustafson Donald E., Kessel William C.	Takagi T., Takagi T., Sugeno M., Sugeno M.	0
561	10.1016/0009-8981(78)90081-5	10.1016/S0076-6879(84)05016-3	137	Biochemistry, Genetics and Molecular Biology, Medicine, Biochemistry, Genetics and Molecular Biology, Medicine, Biochemistry, Genetics and Molecular Biology, Biochemistry, Genetics and Molecular Biology	Biochemistry, Genetics and Molecular Biology, Biochemistry, Genetics and Molecular Biology, Biochemistry, Genetics and Molecular Biology, Biochemistry, Genetics and Molecular Biology, Biochemistry, Genetics and Molecular Biology, Biochemistry, Genetics and Molecular Biology	Serum lipid peroxide in cerebrovascular disorders determined by a new colorimetric method	[13] Catalase in Vitro	Kei S.	Aebi H.	0
562	10.1007/BF00498806		158	Immunology and Microbiology, Biochemistry, Genetics and Molecular Biology, Medicine, Medicine, Biochemistry, Genetics and Molecular Biology, Biochemistry, Genetics and Molecular Biology, Biochemistry, Genetics and Molecular Biology, Immunology and Microbiology, Immunology and Microbiology, Medicine, Immunology and Microbiology, Medicine	Biochemistry, Genetics and Molecular Biology, Agricultural and Biological Sciences, Biochemistry, Genetics and Molecular Biology, Medicine, Biochemistry, Genetics and Molecular Biology, Biochemistry, Genetics and Molecular Biology, Medicine, Biochemistry, Genetics and Molecular Biology, Agricultural and Biological Sciences, Agricultural and Biological Sciences, Medicine, Biochemistry, Genetics an…	Rapid method for distinction of gram-negative from gram-positive bacteria	The neighbor-joining method: a new method for reconstructing phylogenetic trees.	Gregersen T., Gregersen T.	Nei M., Saitou N.	0
563			248	Medicine	Medicine	Ebola haemorrhagic fever in Zaire, 1976. Report of an international commission	Ebola haemorrhagic fever in Sudan, 1976. Report of a WHO/International Study Team	Ghysebrechts G., Declerq R., Burke J., Ghysebrechts G., Declerq R., Burke J., Ghysebrechts G., Declerq R., Burke J.	Gillo A.L., Gillo A.L., Gillo A.L., Deng I.M., Deng I.M., Deng I.M., Duku O., Duku O., Duku O.	0
564			297	Biochemistry, Genetics and Molecular Biology, Biochemistry, Genetics and Molecular Biology	Medicine, Biochemistry, Genetics and Molecular Biology	Estimation of average heterozygosity and genetic distance from a small number of individuals	Construction of a genetic linkage map in man using restriction fragment length polymorphisms	Nei M., Nei M., Nei M., Nei M.	Skolnick M., Davis R.W., White R.L., Botstein D.	0
565		10.1577/1548-8659(1970)99<147:PITEOA>2.0.CO;2	184	Biochemistry, Genetics and Molecular Biology, Biochemistry, Genetics and Molecular Biology	Agricultural and Biological Sciences, Agricultural and Biological Sciences	Estimation of average heterozygosity and genetic distance from a small number of individuals	Polymorphism in the esterases of atlantic herring	Nei M., Nei M., Nei M.	Ridgway G.J., Lewis R.D., Sherburne S.W.	0
566	10.1007/BF01062108	10.1002/jps.2600690125	145	Medicine, Pharmacology, Toxicology and Pharmaceutics	Pharmacology, Toxicology and Pharmaceutics, Pharmacology, Toxicology and Pharmaceutics	Critical evaluation of the potential error in pharmacokinetic studies of using the linear trapezoidal rule method for the calculation of the area under the plasma level-time curve	New calculation method of mean total body clearance of drugs and its application to dosage regimens	Chiou W.L.	Chiou W.L.	1
567		10.1192/bjp.134.4.382	865	Medicine	Medicine	A rating scale for mania: Reliability, validity and sensitivity	A new depression scale designed to be sensitive to change	Young R.C., Ziegler V.E., Biggs J.T., Meyer D.A., Young R.C., Ziegler V.E., Biggs J.T., Meyer D.A.	Asberg M., Asberg M., Asberg M., Asberg M., Montgomery S.A., Montgomery S.A., Montgomery S.A., Montgomery S.A.	0
568		10.1007/BF01953855	355	Biochemistry, Genetics and Molecular Biology	Biochemistry, Genetics and Molecular Biology	Cytotaxonomic considerations on Hoplias lacerdae (Pisces, Erythrinidae)	Controlled silver-staining of nucleolus organizer regions with a protective colloidal developer: a 1-step method	Takahashi C.S., Moreira Filho O., Bertollo L.A.C., Takahashi C.S., Moreira Filho O., Bertollo L.A.C.	Howell W.M., Howell W.M., Howell W.M., Black D.A., Black D.A., Black D.A.	0
569	10.1016/0014-2999(78)90118-8	10.1007/BF00428203	236	Pharmacology, Toxicology and Pharmaceutics	Pharmacology, Toxicology and Pharmaceutics	Behavioural despair in rats: A new model sensitive to antidepressant treatments	The tail suspension test: A new method for screening antidepressants in mice	Porsolt R.D., Blavet N., Jalfre M., Anton G., Porsolt R.D., Blavet N., Jalfre M., Anton G., Porsolt R.D., Blavet N., Jalfre M., Anton G., Porsolt R.D., Blavet N., Jalfre M., Anton G.	Chermat R., Chermat R., Chermat R., Chermat R., Steru L., Steru L., Steru L., Steru L., Simon P., Simon P., Simon P., Simon P., Thierry B., Thierry B., Thierry B., Thierry B.	0
570	10.1145/567752.567778	10.1145/512950.512973	621	Computer Science	Computer Science	Systematic design of program analysis frameworks	Abstract interpretation: ""A"" unified lattice model for static analysis of programs by construction or approximation of fixpoints	Cousot P., Cousot R., Cousot P., Cousot R.	Cousot P., Cousot P., Cousot R., Cousot R.	1
571		10.1109/TPAMI.1986.4767851	1035	Engineering, Engineering, Engineering, Engineering, Engineering	Computer Science, Computer Science, Computer Science, Computer Science, Mathematics	THRESHOLD SELECTION METHOD FROM GRAY-LEVEL HISTOGRAMS.	A Computational Approach to Edge Detection	Otsu Nobuyuki	Canny J.	0
572			250	Engineering, Engineering	Earth and Planetary Sciences, Environmental Science	THRESHOLD SELECTION METHOD FROM GRAY-LEVEL HISTOGRAMS.	An introduction to digital image processing.	Otsu Nobuyuki	Niblack W.	0
573		10.1109/TASSP.1979.1163209	479	Engineering	Computer Science	ENHANCEMENT OF SPEECH CORRUPTED BY ACOUSTIC NOISE.	Suppression of Acoustic Noise in Speech Using Spectral Subtraction	Makhoul J., Berouti M., Schwartz R.	Boll S.F., Boll S.F., Boll S.F.	0
574		10.1109/TASSP.1984.1164453	299	Engineering	Computer Science	ENHANCEMENT OF SPEECH CORRUPTED BY ACOUSTIC NOISE.	Speech Enhancement Using a Minimum Mean-Square Error Short-Time Spectral Amplitude Estimator	Makhoul J., Berouti M., Schwartz R., Makhoul J., Berouti M., Schwartz R.	Malah D., Malah D., Malah D., Ephraim Y., Ephraim Y., Ephraim Y.	1
575		10.1109/TASSP.1985.1164550	191	Engineering	Computer Science	ENHANCEMENT OF SPEECH CORRUPTED BY ACOUSTIC NOISE.	Speech enhancement using a minimum mean-square error-log-spectral amplitude estimator	Makhoul J., Berouti M., Schwartz R., Makhoul J., Berouti M., Schwartz R.	Malah D., Malah D., Malah D., Ephraim Y., Ephraim Y., Ephraim Y.	0
576	10.1016/0304-4165(79)90289-7	10.1016/0076-6879(79)62181-X	300	Biochemistry, Genetics and Molecular Biology, Biochemistry, Genetics and Molecular Biology, Biochemistry, Genetics and Molecular Biology, Biochemistry, Genetics and Molecular Biology, Biochemistry, Genetics and Molecular Biology, Biochemistry, Genetics and Molecular Biology	Biochemistry, Genetics and Molecular Biology, Biochemistry, Genetics and Molecular Biology, Biochemistry, Genetics and Molecular Biology, Biochemistry, Genetics and Molecular Biology, Biochemistry, Genetics and Molecular Biology, Biochemistry, Genetics and Molecular Biology	Levels of glutathione, glutathione reductase and glutathione S-transferase activities in rat lung and liver	Selected methods for the determination of ascorbic acid in animal cells, tissues, and fluids	Depierre J.W., Mannervik B., Moron M.S., Depierre J.W., Mannervik B., Moron M.S., Depierre J.W., Mannervik B., Moron M.S.	Omaye S.T., Omaye S.T., Omaye S.T., David Turnbull J., David Turnbull J., David Turnbull J., Sauberlich H.E., Sauberlich H.E., Sauberlich H.E.	0
577	10.1016/0304-4165(79)90289-7	10.1016/0003-2697(79)90738-3	956	Biochemistry, Genetics and Molecular Biology, Biochemistry, Genetics and Molecular Biology, Biochemistry, Genetics and Molecular Biology, Biochemistry, Genetics and Molecular Biology, Biochemistry, Genetics and Molecular Biology, Biochemistry, Genetics and Molecular Biology, Biochemistry, Genetics and Molecular Biology, Biochemistry, Genetics and Molecular Biology, Biochemistry, Genetics and Mole…	Biochemistry, Genetics and Molecular Biology, Biochemistry, Genetics and Molecular Biology, Biochemistry, Genetics and Molecular Biology, Biochemistry, Genetics and Molecular Biology, Biochemistry, Genetics and Molecular Biology, Biochemistry, Genetics and Molecular Biology, Biochemistry, Genetics and Molecular Biology, Biochemistry, Genetics and Molecular Biology, Biochemistry, Genetics and Mole…	Levels of glutathione, glutathione reductase and glutathione S-transferase activities in rat lung and liver	Assay for lipid peroxides in animal tissues by thiobarbituric acid reaction	Depierre J.W., Mannervik B., Moron M.S., Depierre J.W., Mannervik B., Moron M.S., Depierre J.W., Mannervik B., Moron M.S.	Ohishi N., Ohishi N., Ohishi N., Ohkawa H., Ohkawa H., Ohkawa H., Yagi K., Yagi K., Yagi K.	0
578	10.1016/0304-4165(79)90289-7	10.1016/S0076-6879(84)05019-9	223	Biochemistry, Genetics and Molecular Biology, Biochemistry, Genetics and Molecular Biology, Biochemistry, Genetics and Molecular Biology, Biochemistry, Genetics and Molecular Biology, Biochemistry, Genetics and Molecular Biology, Biochemistry, Genetics and Molecular Biology	Biochemistry, Genetics and Molecular Biology, Biochemistry, Genetics and Molecular Biology, Biochemistry, Genetics and Molecular Biology, Biochemistry, Genetics and Molecular Biology, Biochemistry, Genetics and Molecular Biology, Biochemistry, Genetics and Molecular Biology	Levels of glutathione, glutathione reductase and glutathione S-transferase activities in rat lung and liver	[16] Vitamin E Analysis Methods for Animal Tissues	Depierre J.W., Mannervik B., Moron M.S.	Desai I.D., Desai I.D., Desai I.D.	0
579	10.1016/0304-4165(79)90289-7	10.1016/S0076-6879(84)05016-3	254	Biochemistry, Genetics and Molecular Biology, Biochemistry, Genetics and Molecular Biology, Biochemistry, Genetics and Molecular Biology, Biochemistry, Genetics and Molecular Biology, Biochemistry, Genetics and Molecular Biology, Biochemistry, Genetics and Molecular Biology	Biochemistry, Genetics and Molecular Biology, Biochemistry, Genetics and Molecular Biology, Biochemistry, Genetics and Molecular Biology, Biochemistry, Genetics and Molecular Biology, Biochemistry, Genetics and Molecular Biology, Biochemistry, Genetics and Molecular Biology	Levels of glutathione, glutathione reductase and glutathione S-transferase activities in rat lung and liver	[13] Catalase in Vitro	Depierre J.W., Mannervik B., Moron M.S.	Aebi H., Aebi H., Aebi H.	0
580	10.1016/0076-6879(79)62181-X	10.1016/0003-2697(79)90738-3	410	Biochemistry, Genetics and Molecular Biology, Biochemistry, Genetics and Molecular Biology, Biochemistry, Genetics and Molecular Biology, Biochemistry, Genetics and Molecular Biology, Biochemistry, Genetics and Molecular Biology, Biochemistry, Genetics and Molecular Biology, Biochemistry, Genetics and Molecular Biology, Biochemistry, Genetics and Molecular Biology	Biochemistry, Genetics and Molecular Biology, Biochemistry, Genetics and Molecular Biology, Biochemistry, Genetics and Molecular Biology, Biochemistry, Genetics and Molecular Biology, Biochemistry, Genetics and Molecular Biology, Biochemistry, Genetics and Molecular Biology, Biochemistry, Genetics and Molecular Biology, Biochemistry, Genetics and Molecular Biology	Selected methods for the determination of ascorbic acid in animal cells, tissues, and fluids	Assay for lipid peroxides in animal tissues by thiobarbituric acid reaction	David Turnbull J., Sauberlich H.E., Omaye S.T., David Turnbull J., Sauberlich H.E., Omaye S.T., David Turnbull J., Sauberlich H.E., Omaye S.T.	Ohkawa H., Ohkawa H., Ohkawa H., Ohishi N., Ohishi N., Ohishi N., Yagi K., Yagi K., Yagi K.	0
581	10.1016/0076-6879(79)62181-X	10.1016/S0076-6879(84)05019-9	415	Biochemistry, Genetics and Molecular Biology, Biochemistry, Genetics and Molecular Biology, Biochemistry, Genetics and Molecular Biology, Biochemistry, Genetics and Molecular Biology	Biochemistry, Genetics and Molecular Biology, Biochemistry, Genetics and Molecular Biology, Biochemistry, Genetics and Molecular Biology, Biochemistry, Genetics and Molecular Biology	Selected methods for the determination of ascorbic acid in animal cells, tissues, and fluids	[16] Vitamin E Analysis Methods for Animal Tissues	David Turnbull J., Sauberlich H.E., Omaye S.T.	Desai I.D., Desai I.D., Desai I.D.	0
582	10.1016/0003-2697(79)90738-3	10.1016/0003-2697(80)90139-6	253	Biochemistry, Genetics and Molecular Biology, Biochemistry, Genetics and Molecular Biology, Biochemistry, Genetics and Molecular Biology, Biochemistry, Genetics and Molecular Biology, Biochemistry, Genetics and Molecular Biology, Biochemistry, Genetics and Molecular Biology, Biochemistry, Genetics and Molecular Biology, Biochemistry, Genetics and Molecular Biology, Biochemistry, Genetics and Mole…	Biochemistry, Genetics and Molecular Biology, Biochemistry, Genetics and Molecular Biology, Biochemistry, Genetics and Molecular Biology, Biochemistry, Genetics and Molecular Biology, Biochemistry, Genetics and Molecular Biology, Biochemistry, Genetics and Molecular Biology, Biochemistry, Genetics and Molecular Biology, Biochemistry, Genetics and Molecular Biology, Biochemistry, Genetics and Mole…	Assay for lipid peroxides in animal tissues by thiobarbituric acid reaction	Determination of glutathione and glutathione disulfide using glutathione reductase and 2-vinylpyridine	Ohishi N., Ohkawa H., Yagi K.	Griffith O.W., Griffith O.W., Griffith O.W.	0
583	10.1016/0003-2697(79)90738-3	10.1016/S0076-6879(81)77046-0	217	Biochemistry, Genetics and Molecular Biology, Biochemistry, Genetics and Molecular Biology, Biochemistry, Genetics and Molecular Biology, Biochemistry, Genetics and Molecular Biology, Biochemistry, Genetics and Molecular Biology, Biochemistry, Genetics and Molecular Biology, Biochemistry, Genetics and Molecular Biology, Biochemistry, Genetics and Molecular Biology	Biochemistry, Genetics and Molecular Biology, Biochemistry, Genetics and Molecular Biology, Biochemistry, Genetics and Molecular Biology, Biochemistry, Genetics and Molecular Biology, Biochemistry, Genetics and Molecular Biology, Biochemistry, Genetics and Molecular Biology, Biochemistry, Genetics and Molecular Biology, Biochemistry, Genetics and Molecular Biology	Assay for lipid peroxides in animal tissues by thiobarbituric acid reaction	Glutathione Peroxidase	Ohishi N., Ohkawa H., Yagi K.	Wendel A., Wendel A., Wendel A.	0
584	10.1016/0003-2697(79)90738-3	10.1016/0022-1759(83)90303-4	247	Biochemistry, Genetics and Molecular Biology, Biochemistry, Genetics and Molecular Biology, Biochemistry, Genetics and Molecular Biology, Biochemistry, Genetics and Molecular Biology, Biochemistry, Genetics and Molecular Biology, Biochemistry, Genetics and Molecular Biology, Biochemistry, Genetics and Molecular Biology, Biochemistry, Genetics and Molecular Biology	Immunology and Microbiology, Immunology and Microbiology, Medicine, Immunology and Microbiology, Medicine, Immunology and Microbiology, Medicine, Medicine	Assay for lipid peroxides in animal tissues by thiobarbituric acid reaction	Rapid colorimetric assay for cellular growth and survival: Application to proliferation and cytotoxicity assays	Ohishi N., Ohkawa H., Yagi K.	Mosmann T., Mosmann T., Mosmann T.	0
585	10.1016/0003-2697(79)90738-3	10.1016/S0076-6879(84)05015-1	532	Biochemistry, Genetics and Molecular Biology, Biochemistry, Genetics and Molecular Biology, Biochemistry, Genetics and Molecular Biology, Biochemistry, Genetics and Molecular Biology, Biochemistry, Genetics and Molecular Biology, Biochemistry, Genetics and Molecular Biology, Biochemistry, Genetics and Molecular Biology, Biochemistry, Genetics and Molecular Biology	Biochemistry, Genetics and Molecular Biology, Biochemistry, Genetics and Molecular Biology, Biochemistry, Genetics and Molecular Biology, Biochemistry, Genetics and Molecular Biology, Biochemistry, Genetics and Molecular Biology, Biochemistry, Genetics and Molecular Biology, Biochemistry, Genetics and Molecular Biology, Biochemistry, Genetics and Molecular Biology	Assay for lipid peroxides in animal tissues by thiobarbituric acid reaction	[12] Assays of Glutathione Peroxidase	Ohishi N., Ohkawa H., Yagi K., Ohishi N., Ohkawa H., Yagi K.	Flohe L., Flohe L., Flohe L., Gunzler W.A., Gunzler W.A., Gunzler W.A.	0
586	10.1016/0003-2697(79)90738-3	10.1016/S0076-6879(84)05019-9	280	Biochemistry, Genetics and Molecular Biology, Biochemistry, Genetics and Molecular Biology, Biochemistry, Genetics and Molecular Biology, Biochemistry, Genetics and Molecular Biology, Biochemistry, Genetics and Molecular Biology, Biochemistry, Genetics and Molecular Biology, Biochemistry, Genetics and Molecular Biology, Biochemistry, Genetics and Molecular Biology	Biochemistry, Genetics and Molecular Biology, Biochemistry, Genetics and Molecular Biology, Biochemistry, Genetics and Molecular Biology, Biochemistry, Genetics and Molecular Biology, Biochemistry, Genetics and Molecular Biology, Biochemistry, Genetics and Molecular Biology, Biochemistry, Genetics and Molecular Biology, Biochemistry, Genetics and Molecular Biology	Assay for lipid peroxides in animal tissues by thiobarbituric acid reaction	[16] Vitamin E Analysis Methods for Animal Tissues	Ohishi N., Ohkawa H., Yagi K.	Desai I.D., Desai I.D., Desai I.D.	0
587	10.1016/0003-2697(79)90738-3		859	Biochemistry, Genetics and Molecular Biology, Biochemistry, Genetics and Molecular Biology, Biochemistry, Genetics and Molecular Biology, Biochemistry, Genetics and Molecular Biology, Biochemistry, Genetics and Molecular Biology, Biochemistry, Genetics and Molecular Biology, Biochemistry, Genetics and Molecular Biology, Biochemistry, Genetics and Molecular Biology	Biochemistry, Genetics and Molecular Biology, Biochemistry, Genetics and Molecular Biology, Biochemistry, Genetics and Molecular Biology, Biochemistry, Genetics and Molecular Biology, Biochemistry, Genetics and Molecular Biology, Biochemistry, Genetics and Molecular Biology, Biochemistry, Genetics and Molecular Biology, Biochemistry, Genetics and Molecular Biology	Assay for lipid peroxides in animal tissues by thiobarbituric acid reaction	A modified spectrophotometric assay of superoxide dismutase	Ohishi N., Ohkawa H., Yagi K., Ohishi N., Ohkawa H., Yagi K., Ohishi N., Ohkawa H., Yagi K.	Kakkar P., Kakkar P., Kakkar P., Das B., Das B., Das B., Viswanathan P.N., Viswanathan P.N., Viswanathan P.N.	0
588	10.1016/0003-2697(79)90738-3	10.1016/0003-2697(88)90554-4	106	Biochemistry, Genetics and Molecular Biology, Biochemistry, Genetics and Molecular Biology, Biochemistry, Genetics and Molecular Biology, Biochemistry, Genetics and Molecular Biology, Biochemistry, Genetics and Molecular Biology, Biochemistry, Genetics and Molecular Biology, Biochemistry, Genetics and Molecular Biology, Biochemistry, Genetics and Molecular Biology, Biochemistry, Genetics and Mole…	Biochemistry, Genetics and Molecular Biology, Biochemistry, Genetics and Molecular Biology, Biochemistry, Genetics and Molecular Biology, Biochemistry, Genetics and Molecular Biology, Biochemistry, Genetics and Molecular Biology, Biochemistry, Genetics and Molecular Biology, Biochemistry, Genetics and Molecular Biology, Biochemistry, Genetics and Molecular Biology, Biochemistry, Genetics and Mole…	Assay for lipid peroxides in animal tissues by thiobarbituric acid reaction	A spectrophotometric method for determination of catalase activity in small tissue samples	Ohishi N., Ohkawa H., Yagi K., Ohishi N., Ohkawa H., Yagi K.	Johansson L.H., Johansson L.H., Johansson L.H., Hakan Borg L.A., Hakan Borg L.A., Hakan Borg L.A.	0
589	10.1016/0003-2697(79)90738-3	10.1016/S0076-6879(94)33041-7	213	Biochemistry, Genetics and Molecular Biology, Biochemistry, Genetics and Molecular Biology, Biochemistry, Genetics and Molecular Biology, Biochemistry, Genetics and Molecular Biology, Biochemistry, Genetics and Molecular Biology, Biochemistry, Genetics and Molecular Biology, Biochemistry, Genetics and Molecular Biology, Biochemistry, Genetics and Molecular Biology	Biochemistry, Genetics and Molecular Biology, Biochemistry, Genetics and Molecular Biology, Biochemistry, Genetics and Molecular Biology, Biochemistry, Genetics and Molecular Biology, Biochemistry, Genetics and Molecular Biology, Biochemistry, Genetics and Molecular Biology, Biochemistry, Genetics and Molecular Biology, Biochemistry, Genetics and Molecular Biology	Assay for lipid peroxides in animal tissues by thiobarbituric acid reaction	Oxidative damage to proteins: Spectrophotometric method for carbonyl assay	Ohishi N., Ohkawa H., Yagi K., Ohishi N., Ohkawa H., Yagi K.	Reznick A.Z., Reznick A.Z., Reznick A.Z., Packer L., Packer L., Packer L.	0
590	10.1192/bjp.134.4.382	10.1177/014662167700100306	249	Medicine, Medicine	Social Sciences, Psychology	A new depression scale designed to be sensitive to change	The CES-D Scale: A Self-Report Depression Scale for Research in the General Population	Montgomery S.A., Asberg M.	Radloff L.S., Radloff L.S.	0
591	10.1680/geot.1979.29.1.47	10.1016/0148-9062(88)92293-0	265	Earth and Planetary Sciences, Earth and Planetary Sciences, Earth and Planetary Sciences, Earth and Planetary Sciences	Earth and Planetary Sciences, Earth and Planetary Sciences, Engineering, Engineering	A discrete numerical model for granular assemblies	Formulation of a three-dimensional distinct element model-Part I. A scheme to detect and represent contacts in a system composed of many polyhedral blocks	Cundall P.A., Strack O.D.L.	Cundall P.A., Cundall P.A.	1
592	10.1680/geot.1979.29.1.47		237	Earth and Planetary Sciences, Earth and Planetary Sciences	Engineering, Engineering	A discrete numerical model for granular assemblies	Contact mechanics	Cundall P.A., Strack O.D.L.	Johnson K.L., Johnson K.L.	0
593	10.1109/TASSP.1979.1163209	10.1109/PROC.1979.11540	368	Computer Science	Engineering	Suppression of Acoustic Noise in Speech Using Spectral Subtraction	Enhancement and Bandwidth Compression of Noisy Speech	Boll S.F., Boll S.F.	Lim J.S., Oppenheim A.V.	1
594	10.1109/TASSP.1979.1163209	10.1109/TASSP.1980.1163394	280	Computer Science	Computer Science	Suppression of Acoustic Noise in Speech Using Spectral Subtraction	Speech Enhancement Using a Soft-Decision Noise Suppression Filter	Boll S.F., Boll S.F.	McAulay R.J., Malpass M.L.	1
595	10.1109/TASSP.1979.1163209	10.1109/TASSP.1984.1164453	903	Computer Science	Computer Science	Suppression of Acoustic Noise in Speech Using Spectral Subtraction	Speech Enhancement Using a Minimum Mean-Square Error Short-Time Spectral Amplitude Estimator	Boll S.F., Boll S.F.	Malah D., Ephraim Y.	1
596	10.1109/TASSP.1979.1163209	10.1109/TASSP.1985.1164550	453	Computer Science	Computer Science	Suppression of Acoustic Noise in Speech Using Spectral Subtraction	Speech enhancement using a minimum mean-square error-log-spectral amplitude estimator	Boll S.F., Boll S.F.	Ephraim Y., Malah D.	0
597	10.1016/0022-0000(79)90044-8	10.1016/0022-0000(81)90033-7	309	Mathematics, Mathematics, Mathematics, Computer Science, Mathematics, Mathematics, Computer Science, Computer Science, Computer Science, Computer Science, Computer Science, Mathematics, Computer Science, Computer Science, Mathematics, Mathematics	Computer Science, Mathematics, Mathematics, Computer Science, Computer Science, Computer Science, Computer Science, Mathematics, Mathematics, Computer Science, Computer Science, Computer Science, Mathematics, Mathematics, Mathematics, Mathematics	Universal classes of hash functions	New hash functions and their use in authentication and set equality	Carter J.L., Wegman M.N., Carter J.L., Wegman M.N.	Carter J.L., Carter J.L., Wegman M.N., Wegman M.N.	1
598	10.1090/qam/99636	10.1007/BF01587695	214	Mathematics, Mathematics, Mathematics	Physics and Astronomy, Mathematics, Mathematics	HYDROMAGNETIC FLOW AND HEAT TRANSFER OVER A STRETCHING SHEET.	Flow past a stretching plate	Chakrabarti A., Gupta A.S.	Crane L.J., Crane L.J.	0
599	10.1021/ac50043a017	10.1016/0043-1354(80)90143-8	201	Chemistry, Chemistry, Chemistry, Chemistry	Environmental Science, Environmental Science, Environmental Science, Environmental Science	Sequential Extraction Procedure for the Speciation of Particulate Trace Metals	An ecological risk index for aquatic pollution control.a sedimentological approach	Tessier A., Bisson M., Campbell P.G.C.	Hakanson L., Hakanson L., Hakanson L.	0
600	10.1109/TAC.1979.1102124	10.1109/TAC.1982.1103023	287	Computer Science, Engineering, Engineering, Engineering, Engineering, Engineering, Engineering, Computer Science, Computer Science	Computer Science, Engineering, Engineering, Computer Science, Engineering, Engineering, Computer Science, Engineering, Engineering	Finite Spectrum Assignment Problem for Systems with Delays	Linear Systems with Delayed Controls: A Reduction	Olbrot A.W., Manitius A.Z.	Artstein Z., Artstein Z.	1
601		10.1007/BF00280883	393	Medicine, Medicine	Medicine, Medicine	Glucose clamp technique: a method for quantifying insulin secretion and resistance.	Homeostasis model assessment: insulin resistance and β-cell function from fasting plasma glucose and insulin concentrations in man	Andres R., Tobin J.D., DeFronzo R.A., Andres R., Tobin J.D., DeFronzo R.A., Andres R., Tobin J.D., DeFronzo R.A., Andres R., Tobin J.D., DeFronzo R.A., Andres R., Tobin J.D., DeFronzo R.A., Andres R., Tobin J.D., DeFronzo R.A.	Naylor B.A., Naylor B.A., Naylor B.A., Turner R.C., Turner R.C., Turner R.C., Treacher D.F., Treacher D.F., Treacher D.F., Hosker J.P., Hosker J.P., Hosker J.P., Matthews D.R., Matthews D.R., Matthews D.R., Rudenski A.S., Rudenski A.S., Rudenski A.S.	1
602	10.1109/TIT.1979.1056084	10.1109/TIT.1981.1056307	124	Social Sciences, Social Sciences, Computer Science, Social Sciences, Computer Science, Computer Science, Computer Science, Computer Science, Computer Science, Computer Science, Computer Science, Social Sciences	Engineering, Computer Science, Computer Science, Computer Science, Social Sciences, Computer Science, Computer Science, Social Sciences, Engineering, Engineering, Computer Science, Social Sciences	Capacity Theorems for the Relay Channel	A New Achievable Rate Region for the Interference Channel	El Gamal A.A., Cover T.M., El Gamal A.A., Cover T.M.	Kobayashi K., Kobayashi K., Han T.S., Han T.S.	0
603	10.1145/359168.359176		275	Computer Science, Mathematics, Computer Science, Computer Science, Computer Science, Computer Science	Computer Science, Computer Science, Computer Science, Computer Science, Computer Science, Computer Science	How to Share a Secret	PROTOCOLS FOR SECURE COMPUTATIONS.	Shamir A.	Yao Andrew C.	0
604			103	Medicine, Medicine	Medicine, Pharmacology, Toxicology and Pharmaceutics	Cyclothymic temperamental disorders	Criteria for the 'soft' bipolar spectrum: Treatment implications	Scott-Strauss A., Akiskal H.S., Khani M.K., Scott-Strauss A., Akiskal H.S., Khani M.K.	Akiskal H.S., Akiskal H.S., Akiskal H.S., Mallya G., Mallya G., Mallya G.	0
605	10.1300/J082v04n03_01	10.1080/00224498409551214	178	Psychology, Psychology, Psychology, Psychology, Psychology, Psychology, Psychology, Psychology, Social Sciences, Social Sciences, Social Sciences, Social Sciences, Social Sciences, Social Sciences, Social Sciences, Social Sciences	Arts and Humanities, Psychology, Social Sciences, Social Sciences, Social Sciences, Social Sciences, Psychology, Arts and Humanities, Social Sciences, Social Sciences, Psychology, Arts and Humanities, Social Sciences, Social Sciences, Psychology, Arts and Humanities	Homosexuality Identity Formation	Homosexual identity formation: Testing a theoretical model	Cass V.C.	Cass V.C.	1
606	10.1109/PROC.1979.11540	10.1109/TASSP.1984.1164453	311	Engineering	Computer Science	Enhancement and Bandwidth Compression of Noisy Speech	Speech Enhancement Using a Minimum Mean-Square Error Short-Time Spectral Amplitude Estimator	Oppenheim A.V., Lim J.S., Oppenheim A.V., Lim J.S.	Ephraim Y., Ephraim Y., Malah D., Malah D.	1
607		10.1038/299715a0	203	Earth and Planetary Sciences, Energy, Energy, Earth and Planetary Sciences, Earth and Planetary Sciences	General, General, General, General, General	Plate tectonics and sandstone composition.	Early proterozoic climates and plate motions inferred from major element chemistry of lutites	Suczek C., Dickinson W.R., Suczek C., Dickinson W.R.	Nesbitt H.W., Nesbitt H.W., Young G.M., Young G.M.	0
608	10.1016/0148-9062(79)90241-9	10.1016/0148-9062(90)92708-M	113	Earth and Planetary Sciences, Engineering, Engineering, Earth and Planetary Sciences	Earth and Planetary Sciences, Earth and Planetary Sciences, Engineering, Engineering	Estimating joint roughness coefficients	Joint roughness measurement using shadow profilometry	Tse R., Cruden D.M., Tse R., Cruden D.M., Tse R., Cruden D.M.	Bennett C.P., Bennett C.P., Franklin J.A., Franklin J.A., Maerz N.H., Maerz N.H.	1
609	10.1109/TAC.1979.1102177	10.1109/JOE.1983.1145560	350	Engineering, Engineering, Computer Science, Engineering, Computer Science, Engineering, Engineering, Computer Science, Engineering	Engineering, Engineering, Engineering, Engineering, Engineering, Engineering, Engineering, Engineering, Engineering	An Algorithm for Tracking Multiple Targets	Sonar Tracking of Multiple Targets Using Joint Probabilistic Data Association	Reid D.B., Reid D.B., Reid D.B.	Fortmann T.E., Scheffe M., Bar-Shalom Y.	1
610		10.1016/0043-1354(80)90143-8	175	Medicine, Medicine, Medicine, Medicine	Environmental Science, Environmental Science, Environmental Science, Environmental Science	Heavy metals in the sediments of the Rhine river. Changes since 1971	An ecological risk index for aquatic pollution control.a sedimentological approach	Mueller G.	Hakanson L.	0
611	10.1097/00006842-197905000-00004	10.1111/j.1600-0447.1983.tb09716.x	502	Medicine, Psychology	Medicine, Medicine	Impact of event scale: A measure of subjective stress	The Hospital Anxiety and Depression Scale	Alvarez W., Wilner N., Horowitz M., Alvarez W., Wilner N., Horowitz M.	Snaith R.P., Snaith R.P., Snaith R.P., Zigmond A.S., Zigmond A.S., Zigmond A.S.	0
612	10.1097/00006842-197905000-00004	10.1177/014662167700100306	362	Psychology, Medicine, Medicine, Psychology	Psychology, Psychology, Social Sciences, Social Sciences	Impact of event scale: A measure of subjective stress	The CES-D Scale: A Self-Report Depression Scale for Research in the General Population	Alvarez W., Wilner N., Horowitz M.	Radloff L.S., Radloff L.S., Radloff L.S.	0
613	10.1016/S0021-9673(00)88433-2	10.1016/0167-7012(84)90018-6	220	Chemistry, Biochemistry, Genetics and Molecular Biology, Biochemistry, Genetics and Molecular Biology, Biochemistry, Genetics and Molecular Biology, Chemistry, Chemistry, Chemistry, Chemistry, Chemistry	Biochemistry, Genetics and Molecular Biology, Biochemistry, Genetics and Molecular Biology, Immunology and Microbiology, Medicine, Immunology and Microbiology, Medicine, Biochemistry, Genetics and Molecular Biology, Immunology and Microbiology, Medicine	Thin-layer chromatography of methanolysates of mycolic acid-containing bacteria	An integrated procedure for the extraction of bacterial isoprenoid quinones and polar lipids	Caldicott A.B., Minnikin D.E., Goodfellow M., Hutchinson I.G., Caldicott A.B., Minnikin D.E., Goodfellow M., Hutchinson I.G., Caldicott A.B., Minnikin D.E., Goodfellow M., Hutchinson I.G., Caldicott A.B., Minnikin D.E., Goodfellow M., Hutchinson I.G., Caldicott A.B., Minnikin D.E., Goodfellow M., Hutchinson I.G., Caldicott A.B., Minnikin D.E., Goodfellow M., Hutchinson I.G., Caldicott A.B., Minni…	O'Donnell A.G., O'Donnell A.G., O'Donnell A.G., O'Donnell A.G., Minnikin D.E., Minnikin D.E., Minnikin D.E., Minnikin D.E., Parlett J.H., Parlett J.H., Parlett J.H., Parlett J.H., Schaal A., Schaal A., Schaal A., Schaal A., Athalye M., Athalye M., Athalye M., Athalye M., Alderson G., Alderson G., Alderson G., Alderson G., Goodfellow M., Goodfellow M., Goodfellow M., Goodfellow M.	0
614		10.1073/pnas.87.12.4576	184	Immunology and Microbiology, Immunology and Microbiology, Immunology and Microbiology, Immunology and Microbiology, Immunology and Microbiology, Immunology and Microbiology, Immunology and Microbiology, Immunology and Microbiology	General, Biochemistry, Genetics and Molecular Biology, Earth and Planetary Sciences, Environmental Science, Biochemistry, Genetics and Molecular Biology, General, Earth and Planetary Sciences, Environmental Science	Approved lists of bacterial names	Towards a natural system of organisms: Proposal for the domains Archaea, Bacteria, and Eucarya	Sneath P.H.A., McGowan V., Skerman V.B.D., Sneath P.H.A., McGowan V., Skerman V.B.D., Sneath P.H.A., McGowan V., Skerman V.B.D.	Woese C.R., Woese C.R., Woese C.R., Kandler O., Kandler O., Kandler O., Wheelis M.L., Wheelis M.L., Wheelis M.L.	0
615	10.7326/0003-4819-93-3-391	10.1016/S0140-6736(81)91970-X	132	Medicine	Medicine	Continuous or nocturnal oxygen therapy in hypoxemic chronic obstructive lung disease. A clinical trial	LONG TERM DOMICILIARY OXYGEN THERAPY IN CHRONIC HYPOXIC COR PULMONALE COMPLICATING CHRONIC BRONCHITIS AND EMPHYSEMA. Report of the Medical Research Council Working Party	Kvale P.A., Conway W.A., Coates Jr. E.O.		1
616	10.1002/qj.49710644707	10.1007/BF00164332	426	Earth and Planetary Sciences	Earth and Planetary Sciences	Correction of flux measurements for density effects due to heat and water vapour transfer	Temperature measurement with a sonic anemometer and its application to heat and moisture fluxes	Leuning R., Webb E.K., Pearman G.I., Leuning R., Webb E.K., Pearman G.I., Leuning R., Webb E.K., Pearman G.I.	Schotanus P., Schotanus P., Schotanus P., Nieuwstadt F.T.M., Nieuwstadt F.T.M., Nieuwstadt F.T.M., De Bruin H.A.R., De Bruin H.A.R., De Bruin H.A.R.	0
617	10.1016/0021-9290(80)90007-X	10.1177/027836499000900206	131	Medicine, Medicine, Medicine, Medicine, Medicine, Medicine	Computer Science, Mathematics, Engineering, Mathematics, Engineering, Computer Science	Ballistic walking	Passive Dynamic Walking	McMahon T.A., Mochon S.	Mcgeer T., Mcgeer T.	0
618	10.1109/TAC.1980.1102288	10.1109/TAC.1982.1103023	198	Computer Science, Computer Science, Engineering, Engineering, Engineering, Engineering, Engineering, Engineering, Computer Science	Engineering, Engineering, Engineering, Computer Science, Engineering, Engineering, Computer Science, Engineering, Computer Science	Feedback Stabilization of Linear Systems with Delayed Control	Linear Systems with Delayed Controls: A Reduction	Pearson A.E., Kwon W.H.	Artstein Z., Artstein Z.	1
619	10.1109/TASSP.1980.1163394	10.1109/TASSP.1984.1164453	370	Computer Science	Computer Science	Speech Enhancement Using a Soft-Decision Noise Suppression Filter	Speech Enhancement Using a Minimum Mean-Square Error Short-Time Spectral Amplitude Estimator	McAulay R.J., Malpass M.L., McAulay R.J., Malpass M.L.	Ephraim Y., Ephraim Y., Malah D., Malah D.	1
620	10.1109/TASSP.1980.1163394	10.1109/TASSP.1985.1164550	206	Computer Science	Computer Science	Speech Enhancement Using a Soft-Decision Noise Suppression Filter	Speech enhancement using a minimum mean-square error-log-spectral amplitude estimator	McAulay R.J., Malpass M.L., McAulay R.J., Malpass M.L.	Ephraim Y., Ephraim Y., Malah D., Malah D.	0
621	10.1016/0016-0032(80)90026-5	10.1007/BF00276493	272	Mathematics, Mathematics, Mathematics, Engineering, Engineering, Engineering, Computer Science, Computer Science, Computer Science, Computer Science, Computer Science, Computer Science	Mathematics, Mathematics, Engineering, Mathematics, Mathematics, Engineering, Mathematics, Mathematics, Engineering, Mathematics, Mathematics, Engineering	Dissipative Dynamical Systems: Basic Input-Output and State Properties	Dissipative dynamical systems part I: General theory	Moylan P.J., Hill D.J.	Willems J.C., Willems J.C.	1
622	10.1021/ac50058a010	10.1016/S0022-0728(79)80075-3	323	Chemistry, Chemistry, Chemistry	Chemistry, Chemistry, Chemical Engineering	Rotating Ring-Disk Enzyme Electrode for Biocatalysis Kinetic Studies and Characterization of the Immobilized Enzyme Layer	General expression of the linear potential sweep voltammogram in the case of diffusionless electrochemical systems	Wilson G.S., Kamin R.A.	Laviron E., Laviron E.	0
623	10.1002/bip.1980.360190708	10.1016/S0723-2020(83)80048-4	226	Biochemistry, Genetics and Molecular Biology, Chemistry, Materials Science, Materials Science, Materials Science, Biochemistry, Genetics and Molecular Biology, Biochemistry, Genetics and Molecular Biology, Biochemistry, Genetics and Molecular Biology, Chemistry, Biochemistry, Genetics and Molecular Biology, Biochemistry, Genetics and Molecular Biology, Chemistry	Agricultural and Biological Sciences, Immunology and Microbiology, Agricultural and Biological Sciences, Immunology and Microbiology, Immunology and Microbiology, Immunology and Microbiology, Immunology and Microbiology, Agricultural and Biological Sciences, Agricultural and Biological Sciences, Immunology and Microbiology, Immunology and Microbiology, Immunology and Microbiology	Thermal stability and renaturation of DNA in dimethyl sulfoxide solutions: Acceleration of the renaturation rate	Studies on the spectrophotometric determination of DNA hybridization from renaturation rates	Hutton J.R., Escara J.F., Hutton J.R., Escara J.F., Hutton J.R., Escara J.F.	Schleifer K.H., Schleifer K.H., Festl H., Festl H., Huss V.A.R., Huss V.A.R.	0
624	10.2136/sssaj1980.03615995004400050002x	10.1097/00010694-197406000-00001	370	Agricultural and Biological Sciences	Agricultural and Biological Sciences	CLOSED-FORM EQUATION FOR PREDICTING THE HYDRAULIC CONDUCTIVITY OF UNSATURATED SOILS.	A simple method for determining unsaturated conductivity from moisture retention data	van Genuchten M.Th.	Campbell G.S.	0
625	10.2136/sssaj1980.03615995004400050002x	10.1029/WR008i005p01204	206	Agricultural and Biological Sciences	Environmental Science	CLOSED-FORM EQUATION FOR PREDICTING THE HYDRAULIC CONDUCTIVITY OF UNSATURATED SOILS.	Model for predicting evaporation from a row crop with incomplete cover	van Genuchten M.Th.	Ritchie J.T.	0
626	10.1111/j.1365-246X.1980.tb02601.x	10.1016/0040-1951(81)90110-4	181	Earth and Planetary Sciences, Earth and Planetary Sciences, Earth and Planetary Sciences, Earth and Planetary Sciences, Environmental Science, Environmental Science, Earth and Planetary Sciences, Earth and Planetary Sciences	Earth and Planetary Sciences, Earth and Planetary Sciences, Earth and Planetary Sciences, Earth and Planetary Sciences, Earth and Planetary Sciences, Earth and Planetary Sciences, Earth and Planetary Sciences, Earth and Planetary Sciences	The least‐squares line and plane and the analysis of palaeomagnetic data	Characterization of the magnetic fabric of rocks	Kirschvink J.L.	Jelinek V.	0
627	10.1016/0020-7225(80)90114-7	10.1016/0020-7225(82)90082-9	194	Engineering	Engineering	Incompressible porous media models by use of the theory of mixtures	Compressible porous media models by use of the theory of mixtures	Bowen R.M.	Bowen R.M.	1
628		10.1109/TIT.1983.1056659	497	Engineering, Engineering, Engineering, Engineering	Social Sciences, Computer Science, Computer Science, Engineering	CODING FOR CHANNEL WITH RANDOM PARAMETERS.	Writing on Dirty Paper	Gel'fand S.I., Pinsker M.S.	Costa M.H.M., Costa M.H.M.	1
629	10.1002/j.1538-7305.1980.tb03344.x	10.1109/TIT.1982.1056588	233	Engineering, Engineering, Engineering	Computer Science, Computer Science, Social Sciences	On a Source‐Coding Problem with Two Channels and Three Receivers	Achievable Rates for Multiple Descriptions	Ozarow L., Ozarow L.	Cover T.M., El Gamal A.A.	1
630		10.1680/geot.1983.33.3.187	166	Engineering, Engineering	Earth and Planetary Sciences, Earth and Planetary Sciences	Empirical strength criterion for rock masses.	Strength of jointed rock masses	Brown E.T., Hoek E.	Hoek E., Hoek E.	1
631	10.1007/BF01731581	10.1038/290457a0	228	Agricultural and Biological Sciences, Agricultural and Biological Sciences, Agricultural and Biological Sciences, Biochemistry, Genetics and Molecular Biology, Biochemistry, Genetics and Molecular Biology, Biochemistry, Genetics and Molecular Biology, Medicine, Biochemistry, Genetics and Molecular Biology	General, General, General, General, General, General, General, General	A simple method for estimating evolutionary rates of base substitutions through comparative studies of nucleotide sequences	Sequence and organization of the human mitochondrial genome	Kimura M., Kimura M., Kimura M., Kimura M., Kimura M., Kimura M., Kimura M., Kimura M., Kimura M., Kimura M., Kimura M., Kimura M., Kimura M., Kimura M.	Schreier P.H., Sanger F., Nierlich D.P., Eperon I.C., Drouin J., Coulson A.R., Young I.G., De Bruijn M.H.L., Smith A.J.H., Barrell B.G., Bankier A.T., Anderson S., Roe B.A., Staden R.	0
632	10.1007/BF01731581		141	Biochemistry, Genetics and Molecular Biology, Biochemistry, Genetics and Molecular Biology, Biochemistry, Genetics and Molecular Biology, Biochemistry, Genetics and Molecular Biology, Biochemistry, Genetics and Molecular Biology, Biochemistry, Genetics and Molecular Biology, Biochemistry, Genetics and Molecular Biology, Biochemistry, Genetics and Molecular Biology, Biochemistry, Genetics and Mole…	Agricultural and Biological Sciences, Biochemistry, Genetics and Molecular Biology, Agricultural and Biological Sciences, Agricultural and Biological Sciences, Agricultural and Biological Sciences, Biochemistry, Genetics and Molecular Biology, Agricultural and Biological Sciences, Agricultural and Biological Sciences, Biochemistry, Genetics and Molecular Biology, Agricultural and Biological Scien…	A simple method for estimating evolutionary rates of base substitutions through comparative studies of nucleotide sequences	Phylogenetic inference from restriction endonuclease cleavage site maps with particular reference to the evolution of humans and the apes.	Kimura M.	Templeton A.R.	0
633	10.1007/BF01731581	10.1016/0378-1097(84)90059-4	489	Agricultural and Biological Sciences, Agricultural and Biological Sciences, Agricultural and Biological Sciences, Agricultural and Biological Sciences, Agricultural and Biological Sciences, Agricultural and Biological Sciences, Medicine, Medicine, Medicine, Biochemistry, Genetics and Molecular Biology, Biochemistry, Genetics and Molecular Biology, Biochemistry, Genetics and Molecular Biology, Bio…	Immunology and Microbiology, Biochemistry, Genetics and Molecular Biology, Biochemistry, Genetics and Molecular Biology, Immunology and Microbiology, Biochemistry, Genetics and Molecular Biology, Biochemistry, Genetics and Molecular Biology, Immunology and Microbiology, Biochemistry, Genetics and Molecular Biology, Biochemistry, Genetics and Molecular Biology, Immunology and Microbiology, Biochem…	A simple method for estimating evolutionary rates of base substitutions through comparative studies of nucleotide sequences	Determination of DNA base composition by reversed-phase high-performance liquid chromatography	Kimura M., Kimura M.	Tamaoka J., Komagata K.	0
634	10.1007/BF01731581	10.1073/pnas.75.10.4801	223	Agricultural and Biological Sciences, Biochemistry, Genetics and Molecular Biology, Biochemistry, Genetics and Molecular Biology, Biochemistry, Genetics and Molecular Biology, Biochemistry, Genetics and Molecular Biology, Agricultural and Biological Sciences, Agricultural and Biological Sciences, Medicine	General, General, General, General, General, General, General, General	A simple method for estimating evolutionary rates of base substitutions through comparative studies of nucleotide sequences	Complete nucleotide sequence of a 16S ribosomal RNA gene from Escherichia coli	Kimura M., Kimura M., Kimura M., Kimura M.	Brosius J., Noller H.F., Kennedy P.J., Palmer M.L.	0
635	10.1007/BF01731581	10.1093/sysbio/20.4.406	1141	Agricultural and Biological Sciences, Agricultural and Biological Sciences, Biochemistry, Genetics and Molecular Biology, Biochemistry, Genetics and Molecular Biology, Agricultural and Biological Sciences, Agricultural and Biological Sciences, Agricultural and Biological Sciences, Medicine, Biochemistry, Genetics and Molecular Biology, Biochemistry, Genetics and Molecular Biology, Biochemistry, G…	Biochemistry, Genetics and Molecular Biology, Agricultural and Biological Sciences, Biochemistry, Genetics and Molecular Biology, Agricultural and Biological Sciences, Biochemistry, Genetics and Molecular Biology, Agricultural and Biological Sciences, Biochemistry, Genetics and Molecular Biology, Agricultural and Biological Sciences, Biochemistry, Genetics and Molecular Biology, Agricultural and …	A simple method for estimating evolutionary rates of base substitutions through comparative studies of nucleotide sequences	Toward defining the course of evolution: Minimum change for a specific tree topology	Kimura M.	Fitch W.M.	0
636	10.1007/BF01731581	10.1093/sysbio/27.4.401	227	Biochemistry, Genetics and Molecular Biology, Agricultural and Biological Sciences, Agricultural and Biological Sciences, Biochemistry, Genetics and Molecular Biology, Agricultural and Biological Sciences, Agricultural and Biological Sciences, Biochemistry, Genetics and Molecular Biology, Biochemistry, Genetics and Molecular Biology, Biochemistry, Genetics and Molecular Biology, Agricultural and …	Agricultural and Biological Sciences, Agricultural and Biological Sciences, Biochemistry, Genetics and Molecular Biology, Biochemistry, Genetics and Molecular Biology, Agricultural and Biological Sciences, Biochemistry, Genetics and Molecular Biology, Agricultural and Biological Sciences, Biochemistry, Genetics and Molecular Biology, Agricultural and Biological Sciences, Agricultural and Biologic…	A simple method for estimating evolutionary rates of base substitutions through comparative studies of nucleotide sequences	Cases in which Parsimony or Compatibility Methods will be Positively Misleading	Kimura M.	Felsenstein J.	0
637	10.1111/j.1365-2672.1980.tb01036.x	10.1016/0167-7012(84)90018-6	128	Immunology and Microbiology, Immunology and Microbiology, Immunology and Microbiology, Immunology and Microbiology, Immunology and Microbiology, Immunology and Microbiology	Medicine, Immunology and Microbiology, Biochemistry, Genetics and Molecular Biology, Medicine, Immunology and Microbiology, Biochemistry, Genetics and Molecular Biology	Lipids in the Classification and Identification of Coryneform Bacteria Containing Peptidoglycans Based on 2, 4‐diaminobutyric Acid	An integrated procedure for the extraction of bacterial isoprenoid quinones and polar lipids	JONES D., COLLINS M.D., JONES D., COLLINS M.D., JONES D., COLLINS M.D., JONES D., COLLINS M.D., JONES D., COLLINS M.D., JONES D., COLLINS M.D., JONES D., COLLINS M.D.	Minnikin D.E., Minnikin D.E., Parlett J.H., Parlett J.H., Schaal A., Schaal A., Athalye M., Athalye M., Alderson G., Alderson G., Goodfellow M., Goodfellow M., O'Donnell A.G., O'Donnell A.G.	0
638	10.1111/j.1365-2672.1980.tb01036.x		407	Immunology and Microbiology, Immunology and Microbiology, Immunology and Microbiology, Immunology and Microbiology, Immunology and Microbiology, Immunology and Microbiology, Immunology and Microbiology, Immunology and Microbiology	Biochemistry, Genetics and Molecular Biology, Agricultural and Biological Sciences, Agricultural and Biological Sciences, Biochemistry, Genetics and Molecular Biology, Medicine, Biochemistry, Genetics and Molecular Biology, Biochemistry, Genetics and Molecular Biology, Medicine	Lipids in the Classification and Identification of Coryneform Bacteria Containing Peptidoglycans Based on 2, 4‐diaminobutyric Acid	The neighbor-joining method: a new method for reconstructing phylogenetic trees.	JONES D., COLLINS M.D., JONES D., COLLINS M.D.	Nei M., Nei M., Saitou N., Saitou N.	0
639	10.1007/BF01953855	10.1073/pnas.83.9.2934	277	Biochemistry, Genetics and Molecular Biology	General	Controlled silver-staining of nucleolus organizer regions with a protective colloidal developer: a 1-step method	Cytogenetic analysis using quantitative, high-sensitivity, fluorescence hybridization	Howell W.M., Black D.A., Howell W.M., Black D.A., Howell W.M., Black D.A.	Straume T., Straume T., Gray J.W., Gray J.W., Pinkel D., Pinkel D.	0
640	10.1016/0021-9991(81)90145-5	10.1007/BF01061452	154	Physics and Astronomy, Computer Science, Computer Science, Computer Science, Computer Science, Physics and Astronomy, Physics and Astronomy, Physics and Astronomy	Mathematics, Computer Science, Engineering, Mathematics, Computer Science, Engineering, Computer Science, Computer Science	Volume of fluid (VOF) method for the dynamics of free boundaries	Renormalization group analysis of turbulence. I. Basic theory	Hirt C.W., Nichols B.D., Hirt C.W., Nichols B.D.	Yakhot V., Yakhot V., Orszag S.A., Orszag S.A.	0
641	10.1016/0021-9991(81)90145-5	10.1016/0021-9991(79)90051-2	183	Computer Science, Computer Science, Physics and Astronomy, Physics and Astronomy	Physics and Astronomy, Computer Science, Physics and Astronomy, Computer Science	Volume of fluid (VOF) method for the dynamics of free boundaries	Fully multidimensional flux-corrected transport algorithms for fluids	Hirt C.W., Nichols B.D.	Zalesak S.T., Zalesak S.T.	0
642	10.1016/0021-9991(81)90145-5	10.1103/PhysRevA.43.4320	114	Physics and Astronomy, Computer Science	Physics and Astronomy, Physics and Astronomy	Volume of fluid (VOF) method for the dynamics of free boundaries	Lattice Boltzmann model of immiscible fluids	Hirt C.W., Nichols B.D., Hirt C.W., Nichols B.D., Hirt C.W., Nichols B.D., Hirt C.W., Nichols B.D.	Rothman D.H., Rothman D.H., Gunstensen A.K., Gunstensen A.K., Zaleski S., Zaleski S., Zanetti G., Zanetti G.	1
643	10.1016/0021-9991(81)90145-5	10.1016/0017-9310(72)90054-3	142	Computer Science, Computer Science, Computer Science, Physics and Astronomy, Physics and Astronomy, Physics and Astronomy	Chemical Engineering, Engineering, Physics and Astronomy, Chemical Engineering, Engineering, Physics and Astronomy	Volume of fluid (VOF) method for the dynamics of free boundaries	A calculation procedure for heat, mass and momentum transfer in three-dimensional parabolic flows	Hirt C.W., Nichols B.D., Hirt C.W., Nichols B.D.	Spalding D.B., Spalding D.B., Patankar S.V., Patankar S.V.	0
644	10.1016/0021-9991(81)90145-5		273	Computer Science, Physics and Astronomy	Engineering, Engineering	Volume of fluid (VOF) method for the dynamics of free boundaries	Numerical heat transfer and fluid flow.	Hirt C.W., Nichols B.D.	Patankar S.V., Patankar S.V.	0
645	10.1016/0031-9201(81)90046-7	10.1103/PhysRevD.17.2369	221	Physics and Astronomy, Earth and Planetary Sciences, Earth and Planetary Sciences, Physics and Astronomy	Physics and Astronomy, Physics and Astronomy, Physics and Astronomy, Physics and Astronomy	Preliminary reference Earth model	Neutrino oscillations in matter	Dziewonski A.M., Anderson D.L.	Wolfenstein L., Wolfenstein L.	0
646	10.1016/0040-1951(81)90213-4	10.1144/GSL.SP.1989.042.01.19	157	Earth and Planetary Sciences, Earth and Planetary Sciences, Earth and Planetary Sciences, Earth and Planetary Sciences, Earth and Planetary Sciences, Earth and Planetary Sciences	Environmental Science, Earth and Planetary Sciences, Engineering, Engineering, Earth and Planetary Sciences, Environmental Science	Plumbotectonics-the model	Chemical and isotopic systematics of oceanic basalts: Implications for mantle composition and processes	Doe B.R., Zartman R.E., Doe B.R., Zartman R.E.	McDonough W.F., McDonough W.F., Sun S.-S., Sun S.-S.	0
647	10.1109/TIT.1981.1056307		133	Computer Science, Social Sciences, Computer Science, Engineering, Computer Science, Engineering, Social Sciences, Computer Science	Computer Science, Engineering, Engineering, Computer Science, Engineering, Engineering, Computer Science, Computer Science	A New Achievable Rate Region for the Interference Channel	ON THE GAUSSIAN INTERFERENCE CHANNEL.	Kobayashi K., Han T.S.	Costa Max H.M., Costa Max H.M.	0
648	10.1109/TIT.1981.1056307	10.1109/TIT.1987.1057340	113	Computer Science, Computer Science, Computer Science, Computer Science, Computer Science, Computer Science, Computer Science, Engineering, Computer Science, Social Sciences, Social Sciences, Social Sciences, Social Sciences, Engineering, Engineering, Engineering	Computer Science, Computer Science, Computer Science, Engineering, Social Sciences, Engineering, Social Sciences, Computer Science, Computer Science, Social Sciences, Engineering, Computer Science, Computer Science, Social Sciences, Engineering, Computer Science	A New Achievable Rate Region for the Interference Channel	The Capacity Region of the Discrete Memoryless Interference Channel with Strong Interference	Kobayashi K., Han T.S., Kobayashi K., Han T.S.	Gamal A.A.E., Gamal A.A.E., Costa M.H.M., Costa M.H.M.	0
649		10.1016/S0580-9517(08)70410-0	117	Immunology and Microbiology, Immunology and Microbiology	Medicine, Immunology and Microbiology	Distribution of isoprenoid quinone structural types in bacteria and their taxonomic implications	4 Lipid and Cell-Wall Analysis in Bacterial Systematics	Collins M.D., Jones D., Collins M.D., Jones D.	Komagata K., Komagata K., Suzuki K.-I., Suzuki K.-I.	1
650	10.1016/0002-9394(81)90013-1	10.1016/0002-9394(86)90593-3	114	Medicine	Medicine	The lack of toxicity of intravitreally administered triamcinolone acetonide	Experimental and clinical observations of the intraocular toxicity of commercial corticosteroid preparations	Bessler M., McCuen II B.W., Machemer R., Chandler D., Tano Y., Bessler M., McCuen II B.W., Machemer R., Chandler D., Tano Y., Bessler M., McCuen II B.W., Machemer R., Chandler D., Tano Y., Bessler M., McCuen II B.W., Machemer R., Chandler D., Tano Y.	Hida T., Hida T., Hida T., Hida T., Hida T., Machemer R., Machemer R., Machemer R., Machemer R., Machemer R., Arena J.E., Arena J.E., Arena J.E., Arena J.E., Arena J.E., Chandler D., Chandler D., Chandler D., Chandler D., Chandler D.	1
651	10.1139/e81-019	10.1144/gsjgs.139.5.0605	170	Earth and Planetary Sciences	Earth and Planetary Sciences	TOWARDS A PALEOGEOGRAPHY AND TECTONIC EVOLUTION OF IRAN.	Late Cretaceous and early Miocene Andean-type plutonic activity in northern Makran and central Iran.	King G.C.P., Berberian Manuel, King G.C.P., Berberian Manuel, King G.C.P., Berberian Manuel, King G.C.P., Berberian Manuel	Muir I.D., Muir I.D., Berberian F., Berberian F., Berberian M., Berberian M., Pankhurst R.J., Pankhurst R.J.	0
652	10.1139/e81-019	10.1144/GSL.SP.1992.049.01.49	135	Earth and Planetary Sciences, Earth and Planetary Sciences, Earth and Planetary Sciences	Earth and Planetary Sciences, Environmental Science, Engineering	TOWARDS A PALEOGEOGRAPHY AND TECTONIC EVOLUTION OF IRAN.	A new model for the late Palaeozoic-Mesozoic tectonic evolution of Iran and implications for Oman	King G.C.P., Berberian Manuel	Sengor A.M.C., Sengor A.M.C.	0
653		10.1021/bi00514a017	239	Pharmacology, Toxicology and Pharmaceutics	Biochemistry, Genetics and Molecular Biology	Molecular aspects of ligand binding to serum albumin.	Thermodynamics of Protein Association Reactions: Forces Contributing to Stability	Kragh-Hansen U., Kragh-Hansen U.	Ross P.D., Subramanian S.	0
654	10.1145/358669.358692		460	Computer Science, Computer Science, Computer Science, Computer Science, Computer Science, Mathematics	Engineering, Engineering, Engineering, Engineering, Engineering, Engineering	Random sample consensus: A Paradigm for Model Fitting with Applications to Image Analysis and Automated Cartography	ITERATIVE IMAGE REGISTRATION TECHNIQUE WITH AN APPLICATION TO STEREO VISION.	Bolles R.C., Fischler M.A., Bolles R.C., Fischler M.A.	Kanade Takeo, Kanade Takeo, Lucas Bruce D., Lucas Bruce D.	0
655	10.1145/358669.358692	10.1109/TPAMI.1986.4767851	454	Mathematics, Computer Science, Computer Science, Computer Science, Computer Science, Computer Science, Computer Science, Computer Science, Computer Science, Computer Science, Computer Science, Computer Science, Computer Science, Computer Science, Computer Science, Computer Science, Computer Science, Computer Science, Computer Science, Computer Science, Computer Science, Computer Science, Computer…	Computer Science, Computer Science, Computer Science, Mathematics, Computer Science, Mathematics, Computer Science, Computer Science, Computer Science, Computer Science, Computer Science, Mathematics, Computer Science, Computer Science, Computer Science, Computer Science, Computer Science, Computer Science, Mathematics, Computer Science, Computer Science, Computer Science, Computer Science, Mathe…	Random sample consensus: A Paradigm for Model Fitting with Applications to Image Analysis and Automated Cartography	A Computational Approach to Edge Detection	Bolles R.C., Fischler M.A.	Canny J., Canny J.	0
656	10.1016/0004-3702(81)90024-2		544	Arts and Humanities, Computer Science, Social Sciences	Engineering, Engineering, Engineering	Determining optical flow	ITERATIVE IMAGE REGISTRATION TECHNIQUE WITH AN APPLICATION TO STEREO VISION.	Horn B.K.P., Schunck B.G., Horn B.K.P., Schunck B.G.	Kanade Takeo, Kanade Takeo, Lucas Bruce D., Lucas Bruce D.	0
657	10.1016/0045-7825(82)90071-8	10.1016/0045-7825(81)90049-9	234	Engineering, Engineering, Engineering, Physics and Astronomy, Engineering, Computer Science, Computer Science, Engineering, Physics and Astronomy, Engineering	Computer Science, Engineering, Computer Science, Engineering, Computer Science, Engineering, Computer Science, Engineering, Computer Science, Engineering	Streamline upwind/Petrov-Galerkin formulations for convection dominated flows with particular emphasis on the incompressible Navier-Stokes equations	Lagrangian-Eulerian finite element formulation for incompressible viscous flows	Hughes T.J.R., Brooks A.N., Hughes T.J.R., Brooks A.N., Hughes T.J.R., Brooks A.N.	Zimmermann T.K., Zimmermann T.K., Hughes T.J.R., Hughes T.J.R., Liu W.K., Liu W.K.	0
658	10.1016/0045-7825(82)90128-1	10.1016/0045-7825(81)90049-9	258	Engineering, Computer Science, Engineering, Computer Science, Engineering, Engineering, Engineering, Engineering, Physics and Astronomy, Physics and Astronomy	Engineering, Engineering, Computer Science, Computer Science, Computer Science, Engineering, Computer Science, Engineering, Computer Science, Engineering	An arbitrary lagrangian-eulerian finite element method for transient dynamic fluid-structure interactions	Lagrangian-Eulerian finite element formulation for incompressible viscous flows	Giuliani S., Halleux J.P., Donea J., Giuliani S., Halleux J.P., Donea J., Giuliani S., Halleux J.P., Donea J.	Hughes T.J.R., Hughes T.J.R., Hughes T.J.R., Liu W.K., Liu W.K., Liu W.K., Zimmermann T.K., Zimmermann T.K., Zimmermann T.K.	0
659			555	Engineering, Engineering	Environmental Science, Earth and Planetary Sciences	ITERATIVE IMAGE REGISTRATION TECHNIQUE WITH AN APPLICATION TO STEREO VISION.	Determining optical flow.	Kanade Takeo, Lucas Bruce D., Kanade Takeo, Lucas Bruce D.	Horn B.K.P., Horn B.K.P., Schunck B.G., Schunck B.G.	0
660	10.1109/TCOM.1981.1094950		322	Engineering	Engineering	Displacement Measurement and Its Application in Interframe Image Coding	MOTION-COMPENSATED INTERFRAME CODING FOR VIDEO CONFERENCING.	Jain J.R., Jain J.R., Jain J.R., Jain J.R., Jain J.R.	Koga T., Hirano A., Iinuma K., Ishiguro T., Iijima Y.	0
661	10.1016/0160-7383(81)90082-7	10.1016/0160-7383(79)90004-5	400	Business, Management and Accounting, Business, Management and Accounting, Social Sciences, Social Sciences	Social Sciences, Business, Management and Accounting, Social Sciences, Business, Management and Accounting	Tourist motivation an appraisal		Dann G.M.S.	Crompton J.L.	1
662	10.2190/KM50-WH2K-K2D1-DM69	10.1126/science.6143402	155	Environmental Science	General	PRISON ENVIRONMENT'S EFFECT ON HEALTH CARE SERVICE DEMANDS.	View through a window may influence recovery from surgery	Moore Ernest O.	Ulrich R.S.	0
663	10.1063/1.328693	10.1016/0021-9991(77)90121-8	220	Physics and Astronomy, Physics and Astronomy	Physics and Astronomy, Computer Science	Polymorphic transitions in single crystals: A new molecular dynamics method	Nonphysical sampling distributions in Monte Carlo free-energy estimation: Umbrella sampling	Parrinello M., Rahman A., Parrinello M., Rahman A.	Torrie G.M., Torrie G.M., Valleau J.P., Valleau J.P.	0
664	10.1063/1.328693	10.1021/j100308a038	588	Physics and Astronomy, Physics and Astronomy	Engineering, Chemistry	Polymorphic transitions in single crystals: A new molecular dynamics method	The missing term in effective pair potentials	Parrinello M., Rahman A., Parrinello M., Rahman A., Parrinello M., Rahman A.	Straatsma T.P., Straatsma T.P., Berendsen H.J.C., Berendsen H.J.C., Grigera J.R., Grigera J.R.	0
665	10.1063/1.328693	10.1016/0021-9991(76)90078-4	120	Physics and Astronomy, Physics and Astronomy	Computer Science, Physics and Astronomy	Polymorphic transitions in single crystals: A new molecular dynamics method	Efficient estimation of free energy differences from Monte Carlo data	Parrinello M., Rahman A.	Bennett C.H., Bennett C.H.	0
666	10.1063/1.328693	10.1021/ja00214a001	199	Physics and Astronomy, Physics and Astronomy, Physics and Astronomy, Physics and Astronomy	Chemistry, Biochemistry, Genetics and Molecular Biology, Chemical Engineering, Chemical Engineering	Polymorphic transitions in single crystals: A new molecular dynamics method	The OPLS Potential Functions for Proteins. Energy Minimizations for Crystals of Cyclic Peptides and Crambin	Parrinello M., Rahman A., Parrinello M., Rahman A.	Jorgensen W.L., Jorgensen W.L., Tirado-Rives J., Tirado-Rives J.	0
667	10.1063/1.328693	10.1016/0021-9991(77)90098-5	245	Physics and Astronomy, Physics and Astronomy	Physics and Astronomy, Computer Science	Polymorphic transitions in single crystals: A new molecular dynamics method	Numerical integration of the cartesian equations of motion of a system with constraints: molecular dynamics of n-alkanes	Parrinello M., Rahman A., Parrinello M., Rahman A., Parrinello M., Rahman A.	Berendsen H.J.C., Berendsen H.J.C., Ciccotti G., Ciccotti G., Ryckaert J.-P., Ryckaert J.-P.	0
668	10.1063/1.328693	10.1063/1.448118	1073	Physics and Astronomy, Physics and Astronomy	Chemistry, Physics and Astronomy	Polymorphic transitions in single crystals: A new molecular dynamics method	Molecular dynamics with coupling to an external bath	Parrinello M., Rahman A., Parrinello M., Rahman A., Parrinello M., Rahman A., Parrinello M., Rahman A., Parrinello M., Rahman A.	Haak J.R., Haak J.R., Dinola A., Dinola A., Van Gunsteren W.F., Van Gunsteren W.F., Postma J.P.M., Postma J.P.M., Berendsen H.J.C., Berendsen H.J.C.	1
669	10.1016/0040-1951(81)90110-4	10.1007/BF01613632	292	Earth and Planetary Sciences, Earth and Planetary Sciences, Earth and Planetary Sciences, Earth and Planetary Sciences	Earth and Planetary Sciences, Earth and Planetary Sciences, Earth and Planetary Sciences, Earth and Planetary Sciences	Characterization of the magnetic fabric of rocks	Statistical processing of anisotropy of magnetic susceptibility measured on groups of specimens	Jelinek V., Jelinek V.	Kropacek V., Jelinek V.	0
670	10.1016/S0076-6879(81)77046-0	10.1016/S0076-6879(84)05016-3	350	Biochemistry, Genetics and Molecular Biology, Biochemistry, Genetics and Molecular Biology, Biochemistry, Genetics and Molecular Biology, Biochemistry, Genetics and Molecular Biology	Biochemistry, Genetics and Molecular Biology, Biochemistry, Genetics and Molecular Biology, Biochemistry, Genetics and Molecular Biology, Biochemistry, Genetics and Molecular Biology	Glutathione Peroxidase	[13] Catalase in Vitro	Wendel A.	Aebi H.	0
671	10.1016/S0076-6879(81)77053-8	10.1016/S0076-6879(84)05016-3	175	Biochemistry, Genetics and Molecular Biology, Biochemistry, Genetics and Molecular Biology, Biochemistry, Genetics and Molecular Biology, Biochemistry, Genetics and Molecular Biology	Biochemistry, Genetics and Molecular Biology, Biochemistry, Genetics and Molecular Biology, Biochemistry, Genetics and Molecular Biology, Biochemistry, Genetics and Molecular Biology	Assays for Differentiation of Glutathione S-Transferases	[13] Catalase in Vitro	Jakoby W.B., Habig W.H.	Aebi H., Aebi H.	0
672		10.1097/00004032-198501000-00007	160	Engineering, Business, Management and Accounting, Engineering, Business, Management and Accounting, Business, Management and Accounting, Engineering	Medicine, Environmental Science, Environmental Science, Medicine, Medicine, Medicine	Radioactivity of construction materials	Natural radioactivity of australian building materials, industrial wastes and by-products	Krieger R., Krieger R.	Mathew P.J., Beretka J.	1
673	10.1007/BF01734359	10.1093/sysbio/20.4.406	2079	Biochemistry, Genetics and Molecular Biology, Agricultural and Biological Sciences, Biochemistry, Genetics and Molecular Biology, Agricultural and Biological Sciences, Biochemistry, Genetics and Molecular Biology, Biochemistry, Genetics and Molecular Biology	Biochemistry, Genetics and Molecular Biology, Agricultural and Biological Sciences, Agricultural and Biological Sciences, Biochemistry, Genetics and Molecular Biology, Biochemistry, Genetics and Molecular Biology, Agricultural and Biological Sciences	Evolutionary trees from DNA sequences: A maximum likelihood approach	Toward defining the course of evolution: Minimum change for a specific tree topology	Felsenstein J.	Fitch W.M.	0
[truncated: 523 more rows]
