# Supplementary material for: Delayed Recognition: A Co-Citation Perspective
Source: Front Res Metr Anal. 2021 Feb 19;5:577131. doi: 10.3389/frma.2020.577131 (PMC8028384; doi:10.3389/frma.2020.577131)
Supplement: Supplementary file 2 [file datasheet2.csv]

10.1103/PhysRevB.10.676	10.1103/PhysRevB.4.1211	132
10.1016/0020-0190(78)90067-4	10.1007/3-540-09519-5_73	139
10.1016/0020-0190(78)90067-4	10.1145/322217.322225	161
10.1007/BF01908075	10.1109/TPAMI.1979.4766909	147
10.1007/BF00310707	10.1144/GSL.SP.1989.042.01.19	103
10.1016/0165-0114(86)90077-1	10.1016/S0165-0114(86)80034-3	179
10.1007/BF01645742	10.1007/BF01208266	141
10.1016/0550-3213(79)90192-5	10.1016/0370-2693(83)90170-3	173
10.1007/BF01415558	10.1103/PhysRevLett.44.912	455
10.1007/BF01415558	10.1103/PhysRevD.23.165	371
10.1016/0047-2727(73)90013-3	10.2307/1882010	304
10.1016/0047-2727(76)90014-1	10.2307/2296698	227
10.1063/1.443164	10.1063/1.438980	298
10.1111/j.1540-6261.1973.tb01415.x	10.1111/j.1540-6261.1984.tb03646.x	205
10.1016/0550-3213(73)90622-6	10.1103/PhysRevD.10.1823	126
10.1016/0038-0717(87)90037-X	10.1016/0003-2697(87)90612-9	182
10.1080/01621459.1987.10478441	10.1093/biomet/70.1.41	221
10.1063/1.438357	10.1103/PhysRevB.37.785	216
10.1063/1.438357	10.1103/PhysRevA.38.3098	219
10.1063/1.464913	10.1016/0022-2860(90)80287-T	217
10.1016/0009-2614(80)80041-8	10.1063/1.438208	314
10.1103/PhysRevLett.65.353	10.1103/PhysRevB.13.5188	319
10.1103/PhysRevD.22.2860	10.1016/0370-2693(88)91584-5	173
10.1103/PhysRevD.22.2860	10.1016/0370-2693(80)90825-4	329
10.1103/PhysRevD.22.2860	10.1103/PhysRevD.23.165	438
10.1016/0378-4266(85)90025-1	10.1287/mnsc.30.9.1078	204
10.1037/0021-9010.71.3.500	10.1037/0022-3514.51.6.1173	397
10.1103/PhysRevB.12.905	10.1103/PhysRevB.13.5188	182
10.1524/anly.1985.5.4.301	10.2140/pjm.1993.160.43	150
10.1016/0160-7383(82)90049-4	10.1016/0160-7383(77)90037-8	235
10.1016/0160-7383(82)90049-4	10.1016/0160-7383(81)90082-7	207
10.1016/0160-7383(82)90049-4	10.1016/0160-7383(79)90004-5	350
10.1016/0037-0738(88)90137-6	10.1086/628815	102
10.1016/0037-0738(88)90137-6	\N	179
10.1016/0037-0738(88)90137-6	10.1007/BF00375292	135
10.1016/0037-0738(88)90137-6	10.1086/629071	113
10.1016/0037-0738(88)90137-6	10.1016/0009-2541(93)90140-E	109
10.1016/0037-0738(88)90137-6	10.1016/0016-7037(84)90408-3	162
10.1016/0160-7383(77)90037-8	10.1016/0160-7383(81)90082-7	249
10.1103/PhysRevD.9.1444	10.1103/PhysRevD.1.1376	191
10.1007/BF02414780	\N	105
10.1007/BF02414780	10.1016/0043-1354(80)90143-8	357
10.1103/PhysRevLett.72.3439	10.1103/PhysRevD.23.1693	192
10.1021/ja00443a030	10.1063/1.555808	128
10.1016/0375-9601(79)90150-6	10.1016/0375-9601(76)90101-8	163
10.1016/0304-405X(77)90005-8	10.1016/0304-405X(79)90015-1	196
10.1016/0304-405X(77)90005-8	\N	294
10.1063/1.1665584	10.1103/PhysRevA.4.2019	276
10.1086/115629	10.1093/imamat/18.2.189	163
10.1103/PhysRevLett.66.1107	10.1103/PhysRevLett.60.1351	277
10.1016/0375-9601(87)90222-2	10.1016/0375-9601(88)90840-7	400
10.2113/gsecongeo.67.5.551	10.1016/0040-1951(81)90213-4	152
10.1016/0165-0114(78)90001-5	10.1016/0165-0114(86)90014-X	160
10.1016/0165-0114(78)90001-5	10.1016/0165-0114(84)90032-0	256
10.1016/S0020-1693(00)95610-X	10.1016/S0003-2670(00)80835-1	115
10.1016/0375-9601(88)90840-7	10.1016/0375-9601(88)91034-1	394
10.1103/RevModPhys.57.783	10.1063/1.450037	204
10.1103/PhysRevD.15.2752	10.1103/PhysRevD.7.2333	460
10.1007/BF00295861	10.1016/0022-0531(75)90050-2	127
10.1007/BF01209312	10.1016/0375-9601(76)90101-8	140
10.1016/0550-3213(90)90520-N	10.1016/0370-2693(90)91454-J	126
10.1016/0550-3213(90)90520-N	10.1103/PhysRevD.48.2826	127
10.1016/0550-3213(90)90520-N	10.1103/PhysRevD.47.5453	118
10.1016/0022-1236(82)90048-9	10.1016/0021-9045(89)90041-5	189
10.1016/0022-1236(82)90048-9	10.1090/S0002-9939-1978-0507327-1	306
10.1016/0022-1236(82)90048-9	10.1155/S016117129100056X	136
10.1103/PhysRevLett.61.2015	10.1103/PhysRevB.23.5632	156
10.1103/PhysRevLett.61.2015	10.1103/PhysRevB.14.2239	158
10.1103/PhysRevLett.61.2015	10.1103/PhysRevLett.49.405	746
10.1103/PhysRevLett.61.2015	10.1103/PhysRevLett.50.1395	150
10.1103/PhysRevLett.61.2015	10.1103/PhysRevLett.45.494	373
10.1103/PhysRevLett.61.2015	10.1103/PhysRevLett.48.1559	151
\N	10.1130/0016-7606(1989)101<0635:TDOG>2.3.CO;2	111
10.1080/00268977400100171	10.1063/1.448800	314
10.1080/00268977400100171	10.1063/1.448975	375
10.1080/00268977400100171	10.1063/1.448799	351
10.1080/00268977400100171	10.1002/jcc.540040303	275
10.1103/PhysRevD.22.2323	10.1016/0003-4916(79)90237-9	144
10.1021/j100384a024	10.1016/0022-2860(90)80287-T	119
10.1016/0550-3213(81)90582-4	10.1016/0550-3213(83)90652-1	175
10.1016/0550-3213(81)90442-9	10.1103/PhysRevD.10.4262	303
10.1016/0305-1978(77)90021-7	10.1099/00207713-24-1-54	204
10.1016/0305-1978(77)90021-7	10.1016/0167-7012(84)90018-6	287
10.1016/1048-9843(90)90009-7	10.1037/0033-2909.103.3.411	212
10.1016/0165-0114(89)90187-5	10.1016/0165-0114(85)90090-9	195
10.1016/S0580-9517(08)70474-4	\N	275
10.1103/PhysRevA.8.401	10.1016/0550-3213(84)90287-6	315
10.1016/0370-2693(86)90347-3	10.1016/0370-2693(85)90112-1	125
10.1016/0550-3213(89)90122-3	10.1016/0550-3213(93)90506-K	166
10.1016/0550-3213(74)90383-6	10.1103/PhysRevD.10.1823	105
10.1103/PhysRevD.19.3524	10.1103/PhysRevD.24.3312	165
10.1016/0370-2693(83)90152-1	10.1007/BF01452567	116
10.1016/0022-247X(83)90169-5	10.1016/0165-0114(87)90029-7	341
10.1016/0022-247X(83)90169-5	10.1016/0165-0114(87)90030-3	204
10.1016/0022-247X(83)90169-5	10.1016/0165-0114(86)90026-6	184
10.1016/0012-821X(78)90021-3	10.1016/0012-821X(80)90125-9	205
10.1016/0012-821X(78)90021-3	10.1016/0012-821X(77)90060-7	375
10.1016/0165-0114(88)90064-4	\N	264
10.1080/0022250X.1972.9989806	10.1016/0378-8733(78)90021-7	511
10.1016/0165-0114(89)90205-4	10.1016/S0165-0114(86)80034-3	1253
10.1016/0165-0114(89)90205-4	10.1016/0165-0114(89)90215-7	213
10.1007/BF01449041	10.1016/0022-0396(84)90105-0	227
10.1016/0031-9201(77)90108-X	10.1111/j.1365-246X.1980.tb02601.x	526
10.1037/0022-3514.37.11.2098	10.1126/science.185.4157.1124	177
10.1016/0021-9991(70)90037-9	10.1016/0010-4655(85)90117-1	103
10.1016/0021-9991(70)90037-9	10.1016/0010-4655(78)90047-4	106
10.1016/0021-9991(70)90037-9	10.1093/imamat/18.2.189	101
10.1080/01483918208067640	10.1099/00221287-100-2-221	181
10.1080/01483918208067640	10.1016/0167-7012(84)90018-6	330
10.1016/0020-7225(72)90050-X	10.1063/1.332803	273
10.1016/0370-2693(84)91178-X	10.1016/0370-2693(84)90341-1	210
10.1016/0370-2693(76)90319-1	10.1016/0550-3213(74)90355-1	140
10.1016/0370-2693(76)90319-1	10.1016/0550-3213(81)90522-8	156
10.1016/0370-2693(76)90319-1	10.1016/0370-2693(78)90858-4	164
10.1103/PhysRevD.21.2171	10.1103/PhysRevD.28.2414	159
10.1016/0550-3213(81)90354-0	10.1103/PhysRevD.10.275	212
10.1063/1.527815	10.1063/1.527421	116
10.1016/0370-2693(89)91598-0	10.1016/0370-2693(82)90622-0	120
10.1103/PhysRevA.31.1695	10.1063/1.445869	1595
10.1103/PhysRevA.31.1695	10.1016/0021-9991(77)90121-8	279
10.1103/PhysRevA.31.1695	10.1021/j100308a038	840
10.1103/PhysRevA.31.1695	10.1103/PhysRevB.31.5262	194
10.1103/PhysRevA.31.1695	10.1103/PhysRevB.29.6443	315
10.1103/PhysRevA.31.1695	10.1016/0021-9991(76)90078-4	120
10.1103/PhysRevA.31.1695	10.1103/PhysRevB.33.7983	161
10.1103/PhysRevA.31.1695	10.1103/PhysRevB.39.5566	200
10.1103/PhysRevA.31.1695	10.1002/jcc.540040211	558
10.1007/BF00549096	10.1103/PhysRevB.37.785	473
10.1007/BF00549096	10.1063/1.449486	244
10.1007/BF00549096	10.1080/00268977000101561	126
10.1016/0022-247X(71)90110-7	10.1016/0021-9991(72)90089-7	389
10.1103/PhysRevA.2.1075	10.1103/PhysRevA.3.786	220
10.1016/0370-2693(90)91454-J	10.1103/PhysRevD.48.2826	134
10.1038/293133a0	10.1145/358669.358692	234
10.1080/00268978700101761	10.1126/science.235.4792.1038	151
10.1016/0550-3213(87)90125-8	10.1016/0370-2693(85)90112-1	131
10.1007/BF01650949	10.1002/nme.1620240207	569
10.1016/0097-3165(72)90019-2	\N	204
10.1016/0022-247X(79)90024-6	10.1007/BF02757276	141
10.1063/1.1665613	10.1063/1.1666069	147
10.1016/S0010-8545(00)80009-0	10.1039/DT9840001349	358
10.1007/BF00253395	10.1007/BF00045689	197
10.1016/0370-2693(86)91126-3	10.1103/PhysRevD.22.2227	381
10.1016/0370-2693(86)91126-3	10.1016/0370-2693(84)90334-4	241
10.1016/0370-2693(86)91126-3	10.1016/0370-2693(84)91656-3	249
10.1016/0370-2693(86)91126-3	10.1103/PhysRevD.23.165	290
10.1016/0370-2693(86)91126-3	10.1103/PhysRevLett.57.961	124
10.1037/0022-3514.49.1.95	10.1093/sf/63.4.967	214
10.1016/0550-3213(74)90355-1	10.1016/0550-3213(88)90171-X	105
10.1007/BF00760427	10.1016/0370-2693(80)90670-X	160
10.1016/0898-1221(76)90003-1	\N	403
10.1016/0898-1221(76)90003-1	\N	151
10.1016/0898-1221(76)90003-1	10.1016/S0168-2024(08)70034-1	167
10.1016/0370-2693(80)90670-X	10.1103/RevModPhys.61.1	207
10.1016/0550-3213(70)90416-5	\N	572
10.1016/0550-3213(70)90416-5	10.1016/0370-2693(72)90147-5	402
10.1016/0021-9991(75)90060-1	10.1016/0021-9991(76)90041-3	266
10.1038/235147a0	10.1139/e81-019	181
10.1016/0370-2693(85)90112-1	10.1016/0370-2693(83)91254-6	197
10.1016/0370-2693(85)90112-1	10.1016/0370-2693(83)91253-4	379
10.1016/0370-2693(80)90825-4	10.1103/PhysRevD.22.2227	490
10.1016/0370-2693(80)90825-4	10.1103/PhysRevLett.44.912	437
10.1016/0370-2693(80)90825-4	10.1103/PhysRevD.23.165	504
10.1016/0550-3213(86)90475-X	10.1016/0370-2693(80)90349-4	194
10.1016/0010-4655(78)90047-4	10.1016/0010-4655(80)90062-4	209
10.1016/0010-4655(78)90047-4	10.1016/0377-0427(86)90224-4	118
10.1016/0010-4655(78)90047-4	10.1016/0010-4655(85)90100-6	116
10.1016/0010-4655(78)90047-4	10.1093/imamat/18.2.189	172
10.1007/BF02192660	10.1007/BF02924890	347
10.1007/BF02192660	10.1090/S0002-9939-1978-0507327-1	399
10.1016/0010-0285(75)90005-5	10.3758/BF03197692	102
10.1016/0020-7373(92)90069-W	10.1007/BF01001956	256
10.1007/BF01206178	10.1007/BF01205792	162
10.1016/0010-4655(80)90062-4	10.1016/0377-0427(86)90224-4	121
10.1016/0010-4655(80)90062-4	10.1016/0010-4655(85)90100-6	132
10.1016/0010-4655(80)90062-4	10.1007/BF01395931	123
10.1016/0010-4655(80)90062-4	10.1093/imamat/18.2.189	186
10.1093/biomet/58.1.83	10.1080/01621459.1988.10478560	119
10.1007/BF02291481	10.1037/0033-295X.85.2.59	193
10.1021/ar50061a004	10.1021/ja00757a071	327
10.1007/BF00386001	10.1016/0003-2697(71)90370-8	213
10.1007/BF00386001	10.1016/0003-2697(76)90527-3	594
10.1007/BF00386001	10.1093/jxb/32.1.93	157
10.1016/0048-7333(84)90018-0	10.1177/014920639101700108	166
10.1063/1.445869	10.1063/1.328693	1144
10.1063/1.445869	10.1002/bip.360221211	653
10.1063/1.445869	10.1016/0021-9991(76)90078-4	322
10.1063/1.445869	10.1063/1.439486	402
10.1063/1.445869	10.1016/0021-9991(83)90014-1	469
10.1063/1.445869	10.1080/00268978300102851	384
10.1063/1.445869	10.1080/00268978400101201	713
10.1016/0370-2693(90)91293-K	10.1103/PhysRevLett.41.1581	145
\N	10.1063/1.448800	174
\N	10.1021/cr00088a005	308
\N	10.1063/1.448799	171
\N	10.1007/BF00533485	222
10.1016/0003-4916(89)90322-9	10.1088/0305-4470/14/12/019	314
10.1016/0008-8846(76)90007-7	10.1016/0020-7683(89)90050-4	175
10.1073/pnas.76.10.5269	\N	357
10.1073/pnas.76.10.5269	10.1016/0040-5809(75)90020-9	289
10.1073/pnas.76.10.5269	\N	310
10.1073/pnas.76.10.5269	\N	198
\N	10.1063/1.438955	710
10.1063/1.448800	10.1063/1.438980	379
10.1063/1.448800	10.1063/1.438955	601
10.1063/1.448800	10.1021/ja00544a007	253
10.1063/1.448800	10.1021/ar00072a001	241
10.1063/1.448800	10.1002/jcc.540040303	270
10.1063/1.448800	10.1016/0009-2614(80)80628-2	238
10.1002/adma.19920040409	10.1080/02678299308031946	133
10.1002/adma.19920040409	10.1080/02678299308027752	136
\N	\N	219
\N	\N	232
10.1016/0370-2693(77)90407-5	10.1103/PhysRevD.23.165	151
10.1073/pnas.76.4.1967	10.1007/BF01731581	212
10.1007/BF00384745	10.1007/BF00374895	198
10.1007/BF00384745	10.1016/0012-821X(83)90211-X	269
10.1007/BF00384745	\N	423
10.1007/BF00384745	\N	224
10.1007/BF00384745	10.1007/BF00402202	512
10.1007/BF00384745	10.1016/0301-9268(91)90092-O	130
10.1007/BF00384745	10.1016/0009-2541(77)90057-2	214
10.1007/BF00384745	10.1016/0012-821X(77)90060-7	249
10.1007/BF00384745	10.1016/0012-821X(75)90088-6	169
10.1007/BF00384745	10.1016/0012-821X(80)90116-8	125
10.1007/BF00384745	10.1144/GSL.SP.1986.019.01.04	131
10.1007/BF00018060	\N	814
10.1007/BF00018060	10.1038/227680a0	207
10.1007/BF00018060	10.1016/0003-2697(71)90370-8	569
10.1007/BF00018060	10.1016/0003-2697(76)90527-3	1718
10.1007/BF00018060	10.1093/jxb/32.1.93	345
10.1007/BF00018060	10.1111/j.1399-3054.1992.tb08764.x	143
10.1007/BF00018060	10.1111/j.1399-3054.1983.tb04162.x	166
10.1093/petrology/28.6.1111	10.1144/GSL.SP.1989.042.01.19	101
10.1016/0370-2693(80)90349-4	10.1016/0370-2693(77)90435-X	202
10.1016/0370-2693(73)90490-5	10.1103/PhysRevD.4.1109	108
\N	10.1038/227680a0	234
\N	10.1016/0003-2697(71)90370-8	861
\N	10.1016/0003-2697(80)90139-6	279
\N	10.1016/S0076-6879(84)05016-3	999
\N	10.1016/0003-2697(84)90039-3	204
\N	10.1016/0003-2697(88)90564-7	176
\N	10.1093/jxb/32.1.93	499
\N	10.1016/0076-6879(87)48036-1	341
\N	10.1111/j.1399-3054.1991.tb00121.x	172
\N	10.1111/j.1399-3054.1983.tb04162.x	194
10.1016/0003-4916(84)90242-2	10.1016/0550-3213(74)90154-0	222
10.1007/BF00381441	10.1144/GSL.SP.1989.042.01.19	100
10.1007/BF00045689	10.1016/0377-0427(84)90075-X	200
10.1021/cr00088a005	10.1021/ja00364a005	396
10.1021/cr00088a005	10.1007/BF02401406	255
10.1021/cr00088a005	10.1021/ic50196a034	171
10.1021/cr00088a005	10.1063/1.455064	141
10.1016/0550-3213(91)90266-Z	10.1103/PhysRevD.48.2826	142
10.1016/0370-2693(77)90435-X	10.1103/PhysRevD.23.165	758
10.1016/0370-2693(77)90435-X	10.1103/PhysRevLett.57.961	168
10.1088/0022-3727/4/10/319	10.1063/1.97359	355
10.1088/0022-3727/4/10/319	10.1063/1.325607	201
10.1103/PhysRevLett.52.997	10.1103/PhysRevB.33.8822	276
10.1103/PhysRevLett.56.930	10.1126/science.347575	185
10.1016/0165-4101(83)90011-3	10.1016/0304-405X(76)90026-X	271
10.1016/S0022-5193(70)80032-7	10.1016/S0006-3495(74)85959-X	221
10.1016/S0022-5193(70)80032-7	10.1515/znc-1973-11-1209	525
\N	10.1111/j.1469-1809.1977.tb01918.x	169
10.1111/j.1432-1033.1970.tb00830.x	10.1016/0003-2697(77)90720-5	635
10.1111/j.1432-1033.1970.tb00830.x	10.1002/bip.1980.360190708	207
10.1111/j.1600-0447.1970.tb02066.x	10.1192/bjp.134.4.382	267
10.1016/0022-5193(70)90092-5	10.1016/0022-5193(71)90050-6	270
10.1093/geront/10.1_Part_1.20	10.1016/0022-3956(75)90026-6	739
10.1016/0022-1694(70)90255-6	10.1080/02626667909491834	504
10.1016/0022-1694(70)90255-6	10.2136/sssaj1980.03615995004400050002x	405
10.1016/0022-1694(70)90255-6	10.1080/02723646.1981.10642213	313
10.1016/0022-1694(70)90255-6	10.1080/02626668609491024	300
10.1016/0022-1694(70)90255-6	10.1016/0169-7722(91)90038-3	139
10.1016/0022-1694(70)90255-6	10.1007/BF00939380	172
10.1177/18.5.315	10.1038/227680a0	219
10.1016/0038-1098(70)90262-0	10.1088/0022-3719/13/10/012	190
10.1016/0038-1098(70)90262-0	10.1088/0022-3719/15/23/020	241
\N	10.1016/0038-1098(81)90686-4	234
10.1038/227520a0	10.1111/j.1469-1809.1957.tb01874.x	270
\N	\N	404
10.1109/TIM.1970.4313932	10.1109/PROC.1974.9382	772
\N	\N	285
\N	\N	209
\N	\N	188
10.1016/0022-5193(70)90109-8	10.1177/016173468400600107	285
\N	10.1103/PhysRevD.6.3368	303
\N	10.1016/0370-2693(72)90147-5	363
10.1038/226177a0	10.3758/BF03212183	108
10.1038/227680a0	10.1016/0003-2697(71)90370-8	697
10.1038/227680a0	10.1016/S0074-7696(08)62312-8	158
10.1038/227680a0	10.1016/0003-2697(82)90118-X	178
10.1038/227680a0	10.1271/bbb1961.35.1154	218
10.1038/227680a0	10.1021/jf60217a041	328
10.1177/002199837100500106	10.1115/1.3153664	419
10.1037/h0030377	10.1037/h0077714	108
10.1016/0028-3932(71)90067-4	10.3758/BF03203267	142
10.1016/0028-3932(71)90067-4	10.1016/0022-3956(75)90026-6	827
10.1016/0028-3932(71)90067-4	10.1126/science.7350657	401
10.1016/0028-3932(71)90067-4	10.1016/0013-4694(83)90135-9	325
10.1016/0032-3861(71)90041-3	10.1016/0032-3861(78)90060-5	542
10.1109/TAP.1971.1139935	10.1109/TAP.1971.1139990	139
10.1109/TAP.1971.1139935	10.1109/TAP.1971.1139999	192
10.1152/jn.1971.34.3.337	10.1126/science.173.3997.652	279
10.1176/ajp.127.12.1653	\N	295
10.1109/TCT.1971.1083337	10.1109/PROC.1976.10092	965
\N	10.1061/(ASCE)0733-9410(1983)109:3(458)	226
10.1148/101.1.101	\N	237
10.1016/0003-2697(71)90375-7	10.1016/0003-2697(71)90370-8	234
10.1016/0003-2697(71)90375-7	10.1016/0003-2697(76)90527-3	229
10.1016/0003-2697(71)90370-8	10.1159/000136485	137
10.1016/0003-2697(71)90370-8	\N	266
10.1016/0003-2697(71)90370-8	10.1016/S0076-6879(78)52032-6	212
10.1016/0003-2697(71)90370-8	10.1016/0003-2697(79)90738-3	350
10.1016/0003-2697(71)90370-8	10.1016/S0076-6879(84)05015-1	211
10.1016/0003-2697(71)90370-8	10.1016/0076-6879(90)86135-I	142
10.1016/0003-2697(71)90370-8	10.1016/0076-6879(87)48036-1	177
10.1016/0045-7949(71)90031-9	10.2514/3.60497	292
10.1038/sj.bdj.4802708	10.1016/0022-3913(89)90170-4	156
10.1021/bi00793a015	10.1021/bi00514a017	208
10.1126/science.171.3972.701	10.3758/BF03204234	115
10.1126/science.171.3972.701	10.2466/pms.1978.47.2.599	393
10.1038/230241a0	10.1016/0016-7037(81)90244-1	164
10.1038/230241a0	10.1016/0305-4403(90)90007-R	224
10.1902/jop.1972.43.1.38	\N	275
10.1145/361237.361242	\N	195
10.1145/361237.361242	10.1145/358669.358692	221
\N	\N	221
\N	\N	416
10.1016/0020-7225(72)90039-0	10.1063/1.332803	596
10.1111/j.1532-5415.1972.tb00787.x	10.1016/0531-5565(80)90010-8	207
\N	10.1364/JOSA.73.001434	177
\N	\N	625
\N	10.1016/0003-2697(79)90738-3	287
\N	\N	494
\N	10.1007/BF00280883	1865
10.1016/0003-2697(72)90132-7	\N	296
10.1016/0003-2697(72)90132-7	10.1126/science.179.4073.588	1271
10.1016/0003-2697(72)90132-7	10.1111/j.1432-1033.1974.tb03714.x	551
10.1016/0003-2697(72)90132-7	\N	652
10.1016/0003-2697(72)90132-7	10.1016/0003-2697(76)90527-3	173
10.1016/0003-2697(72)90132-7	10.1016/0304-4165(79)90289-7	472
10.1016/0003-2697(72)90132-7	10.1016/0076-6879(79)62181-X	406
10.1016/0003-2697(72)90132-7	10.1016/S0076-6879(84)05019-9	271
10.1016/0003-2697(72)90132-7	\N	943
10.1016/0003-2697(72)90132-7	10.1016/0009-3084(87)90071-5	174
10.1016/0014-4827(72)90558-7	\N	364
\N	10.1007/BF01731581	276
\N	10.1016/0167-7012(84)90018-6	284
\N	10.1038/267673a0	216
10.1007/BF00250512	10.1002/cpa.3160360506	248
10.1038/newbio239197a0	10.1016/0022-5193(73)90198-7	517
\N	10.1159/000136485	179
\N	\N	782
\N	10.1016/S0076-6879(78)52032-6	349
\N	10.1016/0304-4165(79)90289-7	313
\N	10.1016/0003-2697(79)90738-3	1046
\N	10.1016/0076-6879(90)86141-H	227
10.1016/S0006-291X(72)80218-3	10.1016/0003-2697(76)90527-3	148
10.1016/S0006-291X(72)80218-3	10.1016/0003-2697(79)90738-3	365
10.1016/S0006-291X(72)80218-3	10.1016/S0076-6879(84)05016-3	339
10.1109/PROC.1973.9030	10.1109/TIT.1974.1055186	263
10.1016/0001-6160(73)90064-3	10.1002/pen.760160512	222
10.1016/0001-6160(73)90064-3	10.1016/0022-5096(79)90032-2	527
10.1080/01969727308546046	\N	211
10.1080/01969727308546046	10.1016/0098-3004(84)90020-7	199
10.1109/TIT.1973.1055037	10.1109/TIT.1974.1055171	243
10.1016/0004-6981(73)90140-6	\N	161
10.1177/002199837300700404	10.1115/1.3153664	291
10.1080/01969727308545912	\N	237
\N	10.1016/0022-3956(75)90026-6	239
10.1109/TSMC.1973.4309314	\N	404
10.1109/TSMC.1973.4309314	10.1364/JOSAA.2.001160	134
10.1109/TSMC.1973.4309314	10.1109/TPAMI.1986.4767851	254
10.1147/rd.176.0525	10.1007/3-540-10003-2_104	205
10.2106/00004623-197355080-00006	\N	718
10.1016/0013-7952(73)90013-6	10.1007/BF01261801	361
10.1016/0013-7952(73)90013-6	10.1016/0148-9062(79)90241-9	166
10.1016/0013-7952(73)90013-6	10.1016/0148-9062(83)90595-8	106
\N	10.1111/j.1432-1033.1974.tb03318.x	716
\N	\N	192
\N	\N	190
10.1021/bi00745a020	10.1021/bi00300a022	274
10.1126/science.179.4073.588	10.1111/j.1432-1033.1974.tb03714.x	585
10.1126/science.179.4073.588	10.1016/0003-2697(76)90527-3	249
10.1126/science.179.4073.588	10.1016/S0076-6879(78)52032-6	159
10.1126/science.179.4073.588	10.1016/0304-4165(79)90289-7	583
10.1126/science.179.4073.588	10.1016/0076-6879(79)62181-X	526
10.1126/science.179.4073.588	10.1016/0003-2697(79)90738-3	992
10.1126/science.179.4073.588	10.1016/S0076-6879(84)05019-9	355
10.1126/science.179.4073.588	10.1016/S0076-6879(84)05016-3	161
10.1099/00207713-24-1-54	\N	239
10.1099/00207713-24-1-54	10.1099/00221287-100-2-221	295
10.1099/00207713-24-1-54	10.1016/S0021-9673(00)88433-2	189
10.1099/00207713-24-1-54	10.1016/0167-7012(84)90018-6	409
\N	10.1061/(ASCE)0733-9399(1984)110:3(357)	316
10.1016/0045-7825(74)90029-2	10.1016/0021-9991(81)90145-5	257
10.1109/TIT.1974.1055186	10.1109/TIT.1982.1056454	230
10.1190/1.1440444	10.1111/j.1365-246X.1973.tb06513.x	224
10.1159/000136485	\N	567
10.1159/000136485	\N	229
10.1159/000136485	10.1016/0003-2697(79)90738-3	275
10.1159/000136485	10.1016/0003-9861(81)90095-3	193
10.1159/000136485	10.1016/S0076-6879(84)05015-1	175
10.1159/000136485	10.1016/S0076-6879(84)05016-3	207
10.1159/000136485	\N	122
10.1159/000136485	\N	229
\N	10.1016/0022-3956(75)90026-6	340
\N	10.1099/00221287-100-2-221	290
\N	\N	186
\N	10.1016/0167-7012(84)90018-6	553
\N	10.1016/0378-1097(84)90059-4	187
\N	\N	725
\N	10.1099/00207713-39-3-224	264
10.1017/S0016672300014634	10.1016/0040-5809(75)90020-9	270
10.1016/0002-9343(74)90852-3	10.1016/0002-9343(80)90390-3	213
10.1126/science.185.4157.1124	10.1111/j.1539-6924.1988.tb01168.x	120
10.1111/j.1432-1033.1974.tb03714.x	\N	867
10.1111/j.1432-1033.1974.tb03714.x	10.1016/0006-291X(76)90747-6	245
10.1111/j.1432-1033.1974.tb03714.x	10.1016/S0076-6879(78)52032-6	283
10.1111/j.1432-1033.1974.tb03714.x	10.1016/0304-4165(79)90289-7	573
10.1111/j.1432-1033.1974.tb03714.x	10.1016/0076-6879(79)62181-X	234
10.1111/j.1432-1033.1974.tb03714.x	10.1016/0003-2697(79)90738-3	1289
10.1111/j.1432-1033.1974.tb03714.x	10.1016/S0076-6879(84)05015-1	188
\N	10.1016/0003-2697(78)90342-1	187
\N	10.1016/0076-6879(79)62181-X	247
\N	10.1016/S0076-6879(84)05019-9	199
\N	10.1016/S0076-6879(85)13073-9	191
\N	10.1016/0003-2697(88)90554-4	108
\N	10.1016/0014-4827(88)90265-0	184
10.3758/BF03203267	10.1016/0013-4694(83)90135-9	191
\N	10.1016/0003-2697(76)90527-3	318
10.2208/jscej1969.1974.232_59	\N	175
10.1109/TAC.1974.1100705	10.1093/biomet/65.2.297	223
10.1109/TAC.1974.1100705	10.1007/BF01731581	238
10.1109/TAC.1974.1100705	\N	206
10.1016/S0006-3495(74)85959-X	10.1515/znc-1973-11-1209	206
10.1016/S0140-6736(74)91639-0	10.1016/0022-3956(75)90026-6	219
10.1016/0165-1161(75)90058-8	10.1016/0014-4827(88)90265-0	154
10.1007/BF00261375	10.1016/0020-7683(78)90008-2	603
10.1016/S0020-7373(75)80002-2	10.1016/0020-0255(75)90036-5	207
10.1016/0020-0255(75)90036-5	10.1016/S0165-0114(83)80082-7	168
10.1016/0020-0255(75)90036-5	10.1016/0165-0114(87)90148-5	147
10.1016/0020-0255(75)90036-5	10.1007/BF01001956	151
10.1016/0020-0255(75)90046-8	10.1109/21.87068	198
\N	\N	197
10.1016/0040-5809(75)90020-9	\N	303
10.1111/j.1469-8986.1975.tb01284.x	10.1111/j.1469-8986.1978.tb01390.x	361
10.1115/1.3423596	\N	217
10.1109/TCOM.1975.1092854	10.1109/TCOM.1980.1094608	428
10.1016/0024-3795(75)90075-0	10.1016/0034-4877(72)90011-0	386
10.1016/S0022-460X(75)80105-2	10.1016/0022-460X(76)90948-2	144
10.1002/j.1538-7305.1975.tb02040.x	10.1109/TIT.1978.1055892	1722
10.1002/j.1538-7305.1975.tb02040.x	10.1109/TIT.1978.1055917	1086
10.1002/j.1538-7305.1975.tb02040.x	10.1109/18.243431	283
10.1145/361219.361220	10.1016/0306-4573(88)90021-0	445
10.1145/361219.361220	10.1108/eb046814	329
10.1145/361219.361220	10.1108/eb026526	137
\N	10.1016/0165-0114(84)90069-1	190
\N	10.1016/0165-0114(84)90034-4	146
10.1016/0020-0255(75)90017-1	10.1109/21.87068	148
\N	10.1016/0003-2697(79)90738-3	163
10.7164/antibiotics.28.727	10.7164/antibiotics.28.721	313
\N	10.1021/bi00514a017	234
\N	10.1016/0003-2697(76)90527-3	244
\N	10.1016/0003-2697(79)90738-3	219
\N	\N	195
\N	10.1016/0022-3956(75)90026-6	241
\N	10.1097/00004356-198112000-00001	234
\N	10.5014/ajot.39.6.386	142
10.1016/0022-3956(75)90026-6	10.1016/S0010-9452(76)80035-4	489
10.1016/0022-3956(75)90026-6	10.2307/2529310	322
10.1016/0022-3956(75)90026-6	10.1192/bjp.134.4.382	1045
10.1016/0022-3956(75)90026-6	10.1037/0278-7393.6.2.174	284
10.1016/0022-3956(75)90026-6	10.1037/0022-3514.51.6.1173	246
10.1016/0022-3956(75)90026-6	10.1161/01.STR.20.7.864	182
10.1016/0022-3956(75)90026-6	10.1037/0033-2909.86.2.420	273
10.1016/0022-3956(75)90026-6	10.1177/014662167700100306	2130
10.1111/j.1532-5415.1975.tb00927.x	10.1016/0021-9681(87)90171-8	233
10.1111/j.1532-5415.1975.tb00927.x	10.1177/014662167700100306	348
10.1021/i160057a011	10.1021/ie00076a024	180
10.1287/moor.1.2.117	10.1016/0305-0483(83)90088-9	315
10.1137/0314056	10.1007/BF01581204	121
10.1109/TASSP.1976.1162830	\N	244
10.1109/TAC.1976.1101352	10.1007/BF00276493	407
10.1088/0022-3735/9/11/032	10.1103/PhysRevB.3.1338	190
\N	10.3109/00207459008994241	190
\N	10.1093/sleep/14.6.540	334
10.1016/S0010-9452(76)80035-4	10.1016/S0010-9452(78)80055-0	185
10.1007/BF01685575	10.1038/238037a0	129
10.1016/0003-2697(76)90326-2	10.1016/0003-2697(79)90738-3	382
10.1016/0003-2697(76)90326-2	10.1016/S0076-6879(84)05015-1	204
10.1016/0003-2697(76)90326-2	10.1016/S0076-6879(84)05016-3	228
10.1016/0022-2836(76)90311-9	10.1016/0021-9991(77)90121-8	202
10.1016/0022-2836(76)90311-9	10.1103/PhysRevLett.55.2471	319
10.1016/0022-2836(76)90311-9	10.1063/1.448118	254
\N	10.1016/0003-2697(76)90527-3	138
10.1093/biomet/63.3.581	10.1093/biomet/70.1.41	216
\N	10.1021/bi00514a017	267
10.1016/0003-2697(76)90527-3	10.1016/0003-2697(76)90488-7	288
10.1016/0003-2697(76)90527-3	10.1016/0003-2697(78)90342-1	287
10.1016/0003-2697(76)90527-3	10.1016/0304-4165(79)90289-7	238
10.1016/0003-2697(76)90527-3	10.1016/S0076-6879(81)77046-0	242
10.1016/0003-2697(76)90527-3	10.1016/0003-2697(82)90118-X	594
10.1016/0003-2697(76)90527-3	10.1016/0003-2697(84)90039-3	238
10.1016/0003-2697(76)90527-3	10.1016/0003-2697(86)90640-8	451
10.1016/0003-2697(76)90527-3	10.1016/0014-4827(88)90265-0	367
10.1016/0003-2697(76)90527-3	\N	241
10.1016/0003-2697(76)90527-3	10.1111/j.1399-3054.1983.tb04162.x	187
10.2307/350547	10.1177/014662167700100306	306
10.1016/0002-9149(76)90491-4	10.1161/01.CIR.58.6.1072	382
10.1016/0002-9149(76)90491-4	10.1016/0002-9149(86)90771-X	217
10.1126/science.781840	10.1016/0022-1759(83)90303-4	188
10.2106/00004623-197759010-00013	\N	174
10.2307/2529310	10.1126/science.3287615	143
10.1099/00207713-27-2-104	10.1016/0167-7012(84)90018-6	239
10.1099/00207713-27-2-104	10.1099/00207713-39-3-224	217
10.1038/267673a0	10.1016/0167-2738(84)90049-3	106
10.1038/267673a0	10.1063/1.344049	148
10.1080/00207547708943107	10.1111/j.1540-5915.1988.tb00264.x	310
10.1115/1.3443401	10.1016/0013-7944(85)90052-9	267
10.1016/0021-9991(77)90100-0	10.1016/0021-9991(72)90065-4	243
10.1037/0033-295X.84.2.191	10.1177/014662167700100306	240
10.2136/sssaj1977.03615995004100050005x	10.1139/t79-003	209
10.1007/BF01261801	10.1016/0148-9062(83)90595-8	222
10.1038/266730a0	10.1007/BF00428203	416
10.1176/ajp.134.11.1227	\N	144
10.1073/pnas.74.12.5463	10.1016/0003-2697(80)90515-1	129
10.1099/00221287-100-2-221	\N	114
10.1099/00221287-100-2-221	10.1111/j.1365-2672.1983.tb01297.x	266
10.1099/00221287-100-2-221	10.1016/0167-7012(84)90018-6	407
10.1099/00221287-100-2-221	10.1016/0378-1097(84)90059-4	211
10.1099/00221287-100-2-221	10.1099/00207713-39-3-224	399
10.3758/BF03198740	10.3758/BF03337021	246
10.1016/0003-2697(77)90197-X	10.1017/S0022029900032519	239
10.1016/0003-2697(77)90720-5	10.1016/S0723-2020(83)80048-4	626
10.1016/0003-2697(77)90720-5	10.1016/0378-1097(84)90059-4	235
10.1126/science.198.4312.75	10.1111/j.1467-8624.1979.tb04124.x	105
10.1126/science.199.4335.1302	10.1038/242344a0	373
10.1016/S0022-3476(78)80282-0	10.1097/00000658-197801000-00001	511
10.2106/00004623-197860020-00014	10.2106/00004623-198264090-00004	256
10.1016/S0076-6879(78)52032-6	10.1016/0304-4165(79)90289-7	191
10.1016/S0076-6879(78)52032-6	10.1016/S0076-6879(84)05015-1	288
10.1016/S0076-6879(78)52032-6	10.1016/0163-7258(88)90027-7	103
10.1109/TPAMI.1979.4766909	10.1109/34.85677	306
10.1109/TPAMI.1979.4766909	10.1007/BF02294245	187
10.1109/TPAMI.1979.4766909	10.1080/01969727408546059	548
10.1109/TPAMI.1979.4766909	10.1080/03610927408827101	402
10.1109/TIT.1978.1055892	10.1109/TIT.1978.1055917	686
10.1109/TIT.1978.1055892	10.1109/18.243431	228
10.1149/1.2131532	10.1039/F19837902027	171
10.2307/2392563	10.1037/0022-3514.51.6.1173	163
\N	\N	359
10.1016/0377-2217(78)90138-8	10.1016/0304-4076(77)90052-5	812
10.1016/0377-2217(78)90138-8	10.2307/1928055	356
10.1016/0377-2217(78)90138-8	10.1111/j.1540-6261.1977.tb03324.x	236
10.1037/0096-1523.4.4.565	10.1037/0096-3445.108.3.316	134
10.1016/0025-5564(78)90006-8	10.1007/BF00276956	165
10.1145/359657.359659	10.1109/TIT.1983.1056650	330
\N	10.1109/TSMC.1985.6313399	290
10.1016/0009-8981(78)90081-5	10.1016/S0076-6879(84)05016-3	137
10.1007/BF00498806	\N	158
\N	\N	248
\N	\N	297
\N	10.1577/1548-8659(1970)99<147:PITEOA>2.0.CO;2	184
10.1007/BF01062108	10.1002/jps.2600690125	145
\N	10.1192/bjp.134.4.382	865
\N	10.1007/BF01953855	355
10.1016/0014-2999(78)90118-8	10.1007/BF00428203	236
10.1145/567752.567778	10.1145/512950.512973	621
\N	10.1109/TPAMI.1986.4767851	1035
\N	\N	250
\N	10.1109/TASSP.1979.1163209	479
\N	10.1109/TASSP.1984.1164453	299
\N	10.1109/TASSP.1985.1164550	191
10.1016/0304-4165(79)90289-7	10.1016/0076-6879(79)62181-X	300
10.1016/0304-4165(79)90289-7	10.1016/0003-2697(79)90738-3	956
10.1016/0304-4165(79)90289-7	10.1016/S0076-6879(84)05019-9	223
10.1016/0304-4165(79)90289-7	10.1016/S0076-6879(84)05016-3	254
10.1016/0076-6879(79)62181-X	10.1016/0003-2697(79)90738-3	410
10.1016/0076-6879(79)62181-X	10.1016/S0076-6879(84)05019-9	415
10.1016/0003-2697(79)90738-3	10.1016/0003-2697(80)90139-6	253
10.1016/0003-2697(79)90738-3	10.1016/S0076-6879(81)77046-0	217
10.1016/0003-2697(79)90738-3	10.1016/0022-1759(83)90303-4	247
10.1016/0003-2697(79)90738-3	10.1016/S0076-6879(84)05015-1	532
10.1016/0003-2697(79)90738-3	10.1016/S0076-6879(84)05019-9	280
10.1016/0003-2697(79)90738-3	\N	859
10.1016/0003-2697(79)90738-3	10.1016/0003-2697(88)90554-4	106
10.1016/0003-2697(79)90738-3	10.1016/S0076-6879(94)33041-7	213
10.1192/bjp.134.4.382	10.1177/014662167700100306	249
10.1680/geot.1979.29.1.47	10.1016/0148-9062(88)92293-0	265
10.1680/geot.1979.29.1.47	\N	237
10.1109/TASSP.1979.1163209	10.1109/PROC.1979.11540	368
10.1109/TASSP.1979.1163209	10.1109/TASSP.1980.1163394	280
10.1109/TASSP.1979.1163209	10.1109/TASSP.1984.1164453	903
10.1109/TASSP.1979.1163209	10.1109/TASSP.1985.1164550	453
10.1016/0022-0000(79)90044-8	10.1016/0022-0000(81)90033-7	309
10.1090/qam/99636	10.1007/BF01587695	214
10.1021/ac50043a017	10.1016/0043-1354(80)90143-8	201
10.1109/TAC.1979.1102124	10.1109/TAC.1982.1103023	287
\N	10.1007/BF00280883	393
10.1109/TIT.1979.1056084	10.1109/TIT.1981.1056307	124
10.1145/359168.359176	\N	275
\N	\N	103
10.1300/J082v04n03_01	10.1080/00224498409551214	178
10.1109/PROC.1979.11540	10.1109/TASSP.1984.1164453	311
\N	10.1038/299715a0	203
10.1016/0148-9062(79)90241-9	10.1016/0148-9062(90)92708-M	113
10.1109/TAC.1979.1102177	10.1109/JOE.1983.1145560	350
\N	10.1016/0043-1354(80)90143-8	175
10.1097/00006842-197905000-00004	10.1111/j.1600-0447.1983.tb09716.x	502
10.1097/00006842-197905000-00004	10.1177/014662167700100306	362
10.1016/S0021-9673(00)88433-2	10.1016/0167-7012(84)90018-6	220
\N	10.1073/pnas.87.12.4576	184
10.7326/0003-4819-93-3-391	10.1016/S0140-6736(81)91970-X	132
10.1002/qj.49710644707	10.1007/BF00164332	426
10.1016/0021-9290(80)90007-X	10.1177/027836499000900206	131
10.1109/TAC.1980.1102288	10.1109/TAC.1982.1103023	198
10.1109/TASSP.1980.1163394	10.1109/TASSP.1984.1164453	370
10.1109/TASSP.1980.1163394	10.1109/TASSP.1985.1164550	206
10.1016/0016-0032(80)90026-5	10.1007/BF00276493	272
10.1021/ac50058a010	10.1016/S0022-0728(79)80075-3	323
10.1002/bip.1980.360190708	10.1016/S0723-2020(83)80048-4	226
10.2136/sssaj1980.03615995004400050002x	10.1097/00010694-197406000-00001	370
10.2136/sssaj1980.03615995004400050002x	10.1029/WR008i005p01204	206
10.1111/j.1365-246X.1980.tb02601.x	10.1016/0040-1951(81)90110-4	181
10.1016/0020-7225(80)90114-7	10.1016/0020-7225(82)90082-9	194
\N	10.1109/TIT.1983.1056659	497
10.1002/j.1538-7305.1980.tb03344.x	10.1109/TIT.1982.1056588	233
\N	10.1680/geot.1983.33.3.187	166
10.1007/BF01731581	10.1038/290457a0	228
10.1007/BF01731581	\N	141
10.1007/BF01731581	10.1016/0378-1097(84)90059-4	489
10.1007/BF01731581	10.1073/pnas.75.10.4801	223
10.1007/BF01731581	10.1093/sysbio/20.4.406	1141
10.1007/BF01731581	10.1093/sysbio/27.4.401	227
10.1111/j.1365-2672.1980.tb01036.x	10.1016/0167-7012(84)90018-6	128
10.1111/j.1365-2672.1980.tb01036.x	\N	407
10.1007/BF01953855	10.1073/pnas.83.9.2934	277
10.1016/0021-9991(81)90145-5	10.1007/BF01061452	154
10.1016/0021-9991(81)90145-5	10.1016/0021-9991(79)90051-2	183
10.1016/0021-9991(81)90145-5	10.1103/PhysRevA.43.4320	114
10.1016/0021-9991(81)90145-5	10.1016/0017-9310(72)90054-3	142
10.1016/0021-9991(81)90145-5	\N	273
10.1016/0031-9201(81)90046-7	10.1103/PhysRevD.17.2369	221
10.1016/0040-1951(81)90213-4	10.1144/GSL.SP.1989.042.01.19	157
10.1109/TIT.1981.1056307	\N	133
10.1109/TIT.1981.1056307	10.1109/TIT.1987.1057340	113
\N	10.1016/S0580-9517(08)70410-0	117
10.1016/0002-9394(81)90013-1	10.1016/0002-9394(86)90593-3	114
10.1139/e81-019	10.1144/gsjgs.139.5.0605	170
10.1139/e81-019	10.1144/GSL.SP.1992.049.01.49	135
\N	10.1021/bi00514a017	239
10.1145/358669.358692	\N	460
10.1145/358669.358692	10.1109/TPAMI.1986.4767851	454
10.1016/0004-3702(81)90024-2	\N	544
10.1016/0045-7825(82)90071-8	10.1016/0045-7825(81)90049-9	234
10.1016/0045-7825(82)90128-1	10.1016/0045-7825(81)90049-9	258
\N	\N	555
10.1109/TCOM.1981.1094950	\N	322
10.1016/0160-7383(81)90082-7	10.1016/0160-7383(79)90004-5	400
10.2190/KM50-WH2K-K2D1-DM69	10.1126/science.6143402	155
10.1063/1.328693	10.1016/0021-9991(77)90121-8	220
10.1063/1.328693	10.1021/j100308a038	588
10.1063/1.328693	10.1016/0021-9991(76)90078-4	120
10.1063/1.328693	10.1021/ja00214a001	199
10.1063/1.328693	10.1016/0021-9991(77)90098-5	245
10.1063/1.328693	10.1063/1.448118	1073
10.1016/0040-1951(81)90110-4	10.1007/BF01613632	292
10.1016/S0076-6879(81)77046-0	10.1016/S0076-6879(84)05016-3	350
10.1016/S0076-6879(81)77053-8	10.1016/S0076-6879(84)05016-3	175
\N	10.1097/00004032-198501000-00007	160
10.1007/BF01734359	10.1093/sysbio/20.4.406	2079
10.1007/BF00374895	\N	160
10.1038/299715a0	10.1016/0016-7037(84)90298-9	178
10.1038/299715a0	\N	132
10.1038/299715a0	10.1016/0037-0738(85)90025-9	160
10.1038/299715a0	10.1086/629071	424
10.1038/299715a0	\N	218
10.1038/299715a0	10.1016/0009-2541(88)90010-1	349
10.1038/299715a0	10.1017/S0016756800058581	180
\N	\N	196
10.1016/0163-8343(82)90026-3	10.1007/BF00845519	289
\N	10.1080/02640418808729800	136
\N	10.1016/0167-7012(84)90018-6	114
10.1016/0012-821X(82)90120-0	10.1016/0012-821X(80)90116-8	295
10.1118/1.595078	10.1364/JOSAA.1.000612	216
10.1192/bjp.140.6.566	10.1016/0022-3956(82)90033-4	368
10.1016/S0140-6736(82)90214-8	10.1210/jcem-67-2-373	165
10.1016/0005-2736(82)90050-5	10.1016/0005-2736(83)90480-7	221
10.1093/oxfordjournals.aje.a113284	10.1148/radiology.143.1.7063747	342
10.1093/geronj/37.3.323	10.1016/0022-3956(82)90033-4	153
10.1093/geronj/37.3.323	\N	309
10.1117/12.7972925	10.1016/0262-8856(83)90064-1	325
10.1364/AO.21.002758	10.1364/JOSA.73.001434	177
10.1016/S0165-0114(82)80001-8	10.1016/0165-0114(87)90029-7	159
10.1016/0022-3956(82)90033-4	10.1111/j.1600-0447.1983.tb09716.x	239
10.1016/0022-3956(82)90033-4	10.1016/0021-9681(87)90171-8	274
10.1016/0022-3956(82)90033-4	10.1177/014662167700100306	402
10.1007/3-540-11494-7_22	10.1007/BFb0025774	274
10.1029/RG020i004p00851	10.1175/1520-0469(1989)046<3077:NSOCOD>2.0.CO;2	218
10.1016/0022-1694(82)90066-X	10.1002/joc.3370060607	181
10.1139/f82-158	10.1139/f81-132	272
10.1016/0003-2697(82)90118-X	10.1016/0022-1759(83)90303-4	538
10.1016/0003-2697(82)90118-X	10.1016/S0076-6879(84)05016-3	229
10.1021/bi00260a005	10.1021/ja00319a043	140
10.1021/bi00260a005	10.1021/bi00394a013	213
10.1016/0022-2836(82)90515-0	10.1093/protein/4.2.155	169
10.1287/mnsc.29.1.33	10.1287/mnsc.30.10.1161	145
10.1111/j.1600-0447.1983.tb09716.x	10.1016/0304-3959(83)90125-2	199
10.1111/j.1600-0447.1983.tb09716.x	\N	232
10.1111/j.1600-0447.1983.tb09716.x	10.1016/0304-3959(87)91074-8	194
10.1111/j.1600-0447.1983.tb09716.x	10.1037/0022-006X.56.6.893	216
10.1111/j.1600-0447.1983.tb09716.x	10.1016/0165-1781(89)90047-4	429
10.1111/j.1600-0447.1983.tb09716.x	10.1037/0022-006X.59.1.12	149
10.1111/j.1600-0447.1983.tb09716.x	10.1177/014662167700100306	801
10.1063/1.864230	\N	185
\N	\N	203
\N	10.1016/0012-821X(77)90060-7	213
\N	10.1016/0012-821X(75)90088-6	217
\N	10.1016/0167-7012(84)90018-6	246
\N	\N	417
10.1111/j.1365-2672.1983.tb01297.x	10.1016/0167-7012(84)90018-6	123
10.1111/j.1365-2672.1983.tb01297.x	10.1099/00207713-39-3-224	180
10.1016/0305-0483(83)90088-9	10.1016/S0167-5060(08)70356-X	197
10.1109/TCOM.1983.1095851	10.1109/78.127960	265
10.1115/1.3167042	10.1029/JB088iB12p10359	170
10.1083/jcb.97.2.329	10.1016/0092-8674(83)90040-5	134
10.1083/jcb.97.2.329	10.1083/jcb.101.3.942	124
10.1083/jcb.97.2.329	\N	130
10.1017/S0022112083003201	10.2514/3.60229	125
10.1080/01425918308909911	10.1080/01425918408909921	253
10.1016/S0165-0114(83)80082-7	10.1016/0165-0114(85)90090-9	699
10.1016/S0165-0114(83)80082-7	10.1016/0022-2496(77)90033-5	158
10.1086/628815	\N	159
10.1086/628815	10.1086/629470	190
10.1086/628815	10.1016/0016-7037(84)90408-3	230
\N	10.1007/BF01587695	193
10.1016/0097-8485(83)85001-3	10.1107/S0108767383001762	100
10.1115/1.3167137	10.1016/0734-743X(86)90017-5	230
10.1017/S0033291700048017	10.1177/014662167700100306	234
10.1007/BF02300753	\N	434
10.1175/1520-0450(1983)022<1065:BPOTSF>2.0.CO;2	10.1175/1520-0469(1983)040<1185:TMAMSA>2.0.CO;2	284
10.1175/1520-0450(1983)022<1065:BPOTSF>2.0.CO;2	10.1175/1520-0469(1984)041<2949:TMAMSA>2.0.CO;2	358
10.1016/0012-821X(83)90211-X	\N	250
10.1007/BF00164332	10.1007/BF00122754	197
10.1029/JC088iC14p09671	10.1126/science.170.3962.1088	201
10.1002/bip.360221211	10.1021/j100308a038	162
10.2307/2136404	10.1037/0022-3514.51.6.1173	427
\N	\N	223
\N	10.1016/S0140-6736(86)90837-8	400
10.1016/0022-1759(83)90303-4	10.1016/S0076-6879(84)05016-3	160
\N	10.1093/petrology/25.4.956	627
\N	10.1016/0009-2541(85)90034-8	145
\N	\N	195
\N	10.1130/0016-7606(1989)101<0635:TDOG>2.3.CO;2	377
\N	10.1017/S0263593300007720	159
\N	10.1016/0009-2541(77)90057-2	242
\N	10.1016/0012-821X(75)90088-6	184
10.1126/science.6823562	10.1056/NEJM197111182852108	386
10.1016/0001-6160(84)90213-X	10.1016/0013-7944(85)90052-9	156
10.1016/0001-6160(84)90213-X	10.1016/0022-5096(93)90029-F	171
\N	\N	225
10.1016/0167-7012(84)90018-6	\N	2116
10.1016/0167-7012(84)90018-6	10.1099/00207713-38-4-358	108
10.1016/0167-7012(84)90018-6	10.1016/0378-1097(90)90282-U	113
10.1016/0167-7012(84)90018-6	10.1016/S0580-9517(08)70410-0	965
10.1016/0167-7012(84)90018-6	10.1016/S0580-9517(08)70480-X	176
10.1016/S0076-6879(84)05016-3	\N	214
10.1016/S0076-6879(84)05016-3	10.1016/0003-2697(87)90489-1	246
10.1016/S0076-6879(84)05016-3	\N	411
10.1016/S0076-6879(84)05016-3	10.1016/0076-6879(90)86135-I	635
10.1016/S0076-6879(84)05016-3	10.1021/tx00026a012	138
10.1016/S0076-6879(84)05016-3	10.1016/S0076-6879(94)33040-9	197
10.1016/S0076-6879(84)05016-3	10.1093/jxb/32.1.93	336
10.1016/S0076-6879(84)05016-3	10.1016/0076-6879(87)48036-1	213
10.1093/petrology/25.4.956	\N	199
10.1093/petrology/25.4.956	10.1016/0009-2541(86)90004-5	222
10.1093/petrology/25.4.956	10.1016/0012-821X(91)90029-H	103
10.1093/petrology/25.4.956	10.1016/0012-821X(80)90116-8	298
10.1037/0033-2909.95.3.542	10.1037/0022-3514.51.6.1173	186
10.1190/1.1441754	10.1190/1.1442147	130
10.1190/1.1441754	10.1190/1.1442422	123
10.1287/mnsc.30.9.1078	10.1016/0305-0483(89)90029-7	311
10.1287/mnsc.30.9.1078	10.2307/1928055	201
10.1287/mnsc.30.9.1078	10.1111/j.1540-6261.1977.tb03324.x	177
10.1029/JB089iB13p11517	10.1029/JB092iB01p00357	209
\N	\N	594
\N	\N	292
10.1016/0098-3004(84)90020-7	10.1109/34.85677	142
10.1016/0012-821X(84)90007-4	10.1144/GSL.SP.1989.042.01.19	177
10.1115/1.3167719	10.1007/BF01176650	189
10.1109/TASSP.1984.1164453	10.1109/TASSP.1985.1164550	734
10.1016/0022-460X(84)90595-9	10.1016/0022-460X(85)90390-6	160
10.1016/0013-7944(85)90052-9	10.1016/0022-5096(76)90024-7	222
10.1287/opre.33.1.153	10.1109/TR.1985.5222178	132
10.1287/opre.33.1.153	10.1109/TR.1985.5222235	140
\N	10.1007/BF00375292	162
\N	10.1002/ajpa.1330680103	150
10.1109/TBME.1985.325532	10.1109/TBME.1986.325695	359
10.1007/BF01195768	10.1016/0014-5793(90)80535-Q	112
10.1037/0278-6133.4.3.219	10.1037/0022-3514.51.6.1173	271
10.1037/0278-6133.4.3.219	10.1177/014662167700100306	296
10.1016/0009-2541(85)90034-8	10.1144/GSL.SP.1989.042.01.19	249
10.1109/TPAMI.1985.4767641	10.1109/34.56205	155
10.1061/(ASCE)0733-9445(1985)111:4(722)	10.1193/1.1585416	163
10.1190/1.1441936	10.1111/j.1365-2478.1987.tb00856.x	182
10.1016/0378-7753(85)80071-9	10.1016/0378-7753(85)80082-3	239
10.1680/geot.1985.35.2.99	10.1680/geot.1986.36.1.65	163
10.1109/TR.1985.5222178	10.1109/TR.1985.5222235	159
10.1016/0378-7753(85)80082-3	10.1149/1.2108706	151
10.1016/0038-1098(85)90959-7	10.1063/1.453467	105
\N	\N	231
\N	10.1016/0009-2541(88)90010-1	319
\N	10.1016/0016-7037(84)90408-3	394
10.1016/0037-0738(85)90025-9	\N	121
10.1016/0037-0738(85)90025-9	10.1016/0009-2541(88)90010-1	143
\N	10.1016/0014-5793(90)80535-Q	132
10.1111/j.1574-6968.1985.tb00864.x	10.1038/238037a0	209
10.1093/nar/13.17.6017	10.1021/bi00394a013	193
10.1210/jcem-63-2-492	10.1007/BF02427280	207
10.3171/jns.1986.65.4.0476	10.1136/jnnp.49.1.1	254
10.1007/BF00375292	10.1016/0016-7037(84)90408-3	287
\N	10.1016/0016-7037(79)90257-6	116
\N	10.1061/(ASCE)0733-9445(1988)114:8(1804)	135
\N	10.1109/53.665	184
\N	10.1109/8.76322	185
\N	10.1016/0020-0255(87)90007-7	212
10.1109/TIA.1986.4504799	10.1109/63.17963	904
10.1109/TPAMI.1986.4767851	10.1109/34.244676	126
10.1088/0031-8949/34/5/007	10.1103/PhysRevB.33.8822	212
\N	10.1007/BF00402202	113
\N	10.1016/0009-2541(77)90057-2	208
10.1086/629071	\N	161
10.1086/629071	10.1086/629470	174
10.1086/629071	10.1016/0016-7037(84)90408-3	234
\N	10.1038/272216a0	131
\N	10.1016/0016-7037(79)90257-6	126
10.1130/0091-7613(1986)14<753:EOSAGG>2.0.CO	10.1144/GSL.SP.1989.042.01.19	124
10.1093/petrology/27.3.745	10.1016/0009-2541(77)90057-2	353
10.1093/petrology/27.3.745	10.1016/0012-821X(80)90116-8	173
\N	10.1016/S0897-1897(05)80008-4	122
10.1016/0197-2456(86)90046-2	10.1002/sim.4780070807	219
10.1037/0022-3514.51.6.1173	10.3109/01902149109062868	100
10.1037/0022-3514.51.6.1173	10.1016/0030-5073(76)90016-7	246
10.1037/0022-3514.51.6.1173	10.1037/h0076546	236
10.1037/0022-3514.51.6.1173	10.1007/BF02723327	911
10.1037/0022-3514.51.6.1173	10.1177/135910457000100301	244
10.1037/0022-3514.51.6.1173	10.1177/014920638601200408	1197
10.1037/0022-3514.51.6.1173	10.1111/j.1744-6570.1991.tb00688.x	220
10.1021/bi00367a013	10.1016/0014-5793(90)80535-Q	152
10.1016/0021-9681(87)90171-8	10.7326/0003-4819-113-12-941	334
10.1016/0021-9681(87)90171-8	10.1177/014662167700100306	234
10.1007/BF00402202	10.1038/347662a0	222
10.1017/S002211208700288X	10.1029/JC092iC11p11803	189
\N	\N	152
10.1016/0020-0255(87)90007-7	10.1111/j.1467-8640.1988.tb00279.x	235
10.1017/S0022112087000727	10.1016/0003-682X(70)90031-9	186
10.1037/0022-3514.52.6.1122	10.1037/0022-3514.54.6.1063	220
\N	10.1016/S0022-5193(05)80104-3	207
\N	10.1016/S0723-2020(88)80040-7	218
10.1122/1.549926	10.1016/0021-9991(80)90163-1	153
10.1016/0165-0114(87)90111-4	10.1016/0165-0114(78)90031-3	186
\N	10.1016/0009-2541(88)90010-1	151
\N	10.1086/629470	105
\N	10.1016/0016-7037(84)90408-3	120
10.2475/ajs.287.5.401	10.1126/science.170.3962.1088	183
10.1016/0165-0114(87)90029-7	10.1016/0165-0114(86)90026-6	291
10.1021/bi00394a013	10.1021/ja00268a057	103
10.1021/bi00394a013	10.1021/ja00190a046	278
10.1021/bi00394a013	10.1021/ar00177a001	116
10.1016/0010-4825(88)90041-8	10.1016/0167-2789(88)90081-4	157
10.1016/0009-2541(88)90010-1	10.1016/0016-7037(90)90269-Q	166
10.1016/0009-2541(88)90010-1	10.1016/0016-7037(84)90408-3	208
10.1109/21.87068	\N	234
\N	10.1016/0076-6879(90)86135-I	198
10.1037/0022-3514.54.6.1063	10.1016/0165-1781(89)90047-4	198
10.1037/0022-3514.54.6.1063	10.1037/0003-066X.44.3.513	226
10.1037/0022-3514.54.6.1063	10.1037/0033-2909.103.3.411	269
10.1037/0022-3514.54.6.1063	10.1037/0022-3514.45.3.513	254
10.1007/BF02100115	10.1016/S0022-5193(05)80104-3	144
10.1111/j.1360-0443.1989.tb03059.x	10.1111/j.1360-0443.1991.tb01879.x	211
10.1099/00207713-39-3-224	10.1111/j.1472-765X.1989.tb00262.x	167
10.1109/21.24528	10.1080/01690969108406936	207
10.1086/629290	10.1086/648222	134
10.1130/0016-7606(1989)101<0635:TDOG>2.3.CO;2	10.1016/0024-4937(89)90028-5	277
10.1130/0016-7606(1989)101<0635:TDOG>2.3.CO;2	10.1016/0301-9268(91)90092-O	103
10.1037/0003-066X.44.3.513	10.1002/job.4030020205	254
10.1109/9.24201	10.1109/70.88057	235
10.1109/50.32378	\N	134
10.1037/0003-066X.44.9.1175	10.1016/0749-5978(91)90020-T	150
10.1016/0076-6879(90)86141-H	10.1016/0076-6879(90)86135-I	256
10.1016/S0022-2836(05)80360-2	10.1002/pro.5560020916	170
10.1016/S0022-2836(05)80360-2	10.1093/sysbio/20.4.406	219
10.1109/61.103696	10.1109/61.103694	130
10.1007/BF02238804	10.1007/BF02023073	167
10.1038/347662a0	10.1016/0012-821X(75)90088-6	134
10.1016/0020-7225(91)90165-Y	10.1007/BF01176650	244
10.1111/j.1360-0443.1991.tb01879.x	10.1111/j.1360-0443.1993.tb02093.x	260
10.1093/petrology/32.2.365	10.1144/GSL.SP.1989.042.01.19	177
10.1037/0022-3514.61.1.115	10.1177/014662167700100306	150
10.1109/34.85677	10.1080/01969727408546059	188
10.1016/0047-2484(91)90034-S	10.1017/S0094837300005820	166
10.1111/j.1360-0443.1993.tb02093.x	10.1177/014662167700100306	210
10.1007/BF00283225	10.1144/GSL.SP.1989.042.01.19	127
10.1086/648222	10.1130/SPE284-p21	105
10.1086/648222	10.1016/0016-7037(84)90408-3	168
10.1016/0009-2541(93)90140-E	10.1144/GSL.SP.1989.042.01.19	143
10.1007/BF00320972	10.1144/GSL.SP.1989.042.01.19	166
10.1016/0009-2541(94)90066-3	10.1144/GSL.SP.1989.042.01.19	111
10.1007/BF00307273	10.1144/GSL.SP.1989.042.01.19	207
10.1016/0301-0104(73)80059-X	10.1063/1.1679012	158
10.1016/0009-2614(89)87234-3	10.1016/0301-0104(81)85090-2	204
10.1063/1.527421	10.1103/PhysRevLett.27.1192	103
10.1016/0370-2693(85)90689-6	10.1103/PhysRevLett.68.741	131
10.1021/ja00083a040	10.1063/1.1674408	116
10.1016/0167-2681(80)90051-7	10.1037/h0034747	100
10.1016/0370-2693(91)90536-Y	10.1016/0370-2693(91)90413-K	146
10.1007/BF00143739	10.1016/0010-0285(73)90033-9	100
10.1063/1.438980	10.1063/1.1677527	767
10.1063/1.438980	\N	294
10.1063/1.438980	10.1016/0301-0104(81)85090-2	238
10.1130/0091-7613(1990)018<0128:PAACRO>2.3.CO;2	10.1144/GSL.SP.1989.042.01.19	121
10.1038/354056a0	10.1103/PhysRevB.13.5188	444
10.1016/0021-9991(77)90121-8	10.1021/j100308a038	131
10.1016/0021-9991(77)90121-8	10.1016/0009-2614(74)80109-0	234
10.1016/0021-9991(77)90121-8	10.1016/0021-9991(77)90098-5	473
10.1016/0021-9991(77)90121-8	10.1063/1.448118	392
10.1016/0021-9991(77)90121-8	10.1063/1.447334	167
10.1016/0021-9991(77)90121-8	10.1002/jcc.540040211	296
10.1016/0034-4877(86)90055-8	10.1103/PhysRevLett.60.2339	160
10.1063/1.97359	10.1103/PhysRevB.45.13509	185
10.1063/1.97359	10.1063/1.347243	233
10.1103/PhysRevB.37.785	10.1126/science.218.4574.747	316
10.1103/PhysRevB.37.785	10.1038/318162a0	417
10.1103/PhysRevB.37.785	10.1103/PhysRevB.13.5188	663
10.1103/PhysRevB.37.785	10.1039/P298700000S1	305
10.1103/PhysRevB.37.785	10.1007/BF02401406	321
10.1103/PhysRevB.37.785	10.1021/ic00277a030	266
10.1103/PhysRevB.37.785	10.1063/1.447334	515
10.1103/PhysRevB.37.785	10.1016/0003-4916(74)90333-9	298
10.1103/PhysRevB.37.785	10.1063/1.456066	207
10.1103/PhysRevB.37.785	10.1016/0022-2860(90)80287-T	243
10.1103/PhysRevB.37.785	10.1016/0009-2614(88)80378-6	233
10.1103/PhysRevB.37.785	10.1016/0009-2614(82)80012-2	246
10.1103/PhysRevB.37.785	10.1080/00268978400101201	330
10.1103/PhysRevB.37.785	10.1002/jcc.540040211	374
10.1103/PhysRevB.37.785	10.1002/qua.560100211	257
10.1103/PhysRevB.37.785	10.1002/qua.560140504	170
10.1126/science.218.4574.747	10.1021/ja00364a005	248
10.1063/1.1677527	10.1021/ja00544a007	226
10.1063/1.1677527	10.1021/ar00072a001	233
10.1063/1.1677527	10.1063/1.445134	195
10.1063/1.1677527	10.1080/00268977000101561	532
10.1063/1.1677527	10.1016/0301-0104(81)85090-2	410
10.1021/ja00364a005	10.1103/PhysRevA.38.3098	419
10.1021/ja00364a005	10.1063/1.449486	291
10.1021/ja00364a005	10.1002/jcc.540030212	153
10.1016/0003-4916(76)90156-1	10.1016/0370-2693(74)90058-6	225
10.1016/0301-0104(74)85005-6	10.1103/PhysRevLett.29.705	173
10.1021/ja00839a011	10.1107/S0108767383001762	358
10.1103/PhysRevB.13.5188	10.1103/PhysRevLett.51.1884	180
10.1103/PhysRevB.13.5188	10.1103/PhysRevB.33.8800	394
10.1103/PhysRevB.13.5188	10.1103/PhysRevB.31.805	289
10.1103/PhysRevB.13.5188	10.1021/ja00246a021	188
10.1103/PhysRevB.13.5188	10.1063/1.458452	742
10.1103/PhysRevB.13.5188	10.1063/1.447334	370
10.1103/PhysRevB.13.5188	10.1088/0022-3719/12/22/036	187
10.1103/PhysRevB.13.5188	10.1107/S0567739476001551	524
10.1016/0165-4101(81)90002-1	10.1016/0165-4101(81)90009-4	176
10.1016/0165-4101(81)90002-1	10.1016/0304-405X(76)90026-X	357
10.1021/j100214a025	10.1021/ja00457a071	275
10.1021/j100214a025	10.1016/0009-2614(74)85388-1	502
10.1103/PhysRevLett.49.405	10.1103/PhysRevLett.62.2747	133
10.1103/PhysRevLett.49.405	10.1103/PhysRevLett.42.1698	138
10.1007/BF01608499	10.1016/0378-4371(83)90013-4	307
10.1103/PhysRevLett.56.1335	10.1016/0550-3213(82)90035-9	149
10.1103/PhysRevLett.62.2747	10.1103/PhysRevLett.42.1698	141
10.1016/0370-2693(87)91197-X	10.1093/biomet/57.1.97	166
10.1037/0033-2909.88.3.588	\N	314
10.1103/PhysRevD.22.2227	10.1103/PhysRevD.10.275	224
10.1103/PhysRevD.22.2227	10.1103/PhysRevD.12.1502	202
10.1103/PhysRevD.22.2227	10.1103/PhysRevD.11.2558	166
10.1103/PhysRevB.16.1748	10.1103/PhysRevB.41.7892	330
10.1103/PhysRevD.10.275	10.1103/PhysRevLett.50.1427	158
10.1016/0009-2614(89)85118-8	10.1002/jcc.540040211	186
10.1103/PhysRevLett.55.2471	10.1080/00268977000101561	154
10.1103/PhysRevD.48.2826	10.1103/PhysRevD.47.5453	236
10.1021/cr00002a004	10.1021/cr60274a001	124
10.1103/PhysRevD.6.3368	10.1016/0370-2693(72)90147-5	323
10.1016/0301-0104(84)80039-7	10.1063/1.1674535	222
10.1016/0550-3213(79)90316-X	10.1103/PhysRevLett.44.912	259
10.1016/0550-3213(79)90316-X	10.1103/PhysRevD.17.2369	115
10.1103/PhysRevD.9.3292	10.1007/BF02757029	390
10.1103/PhysRevB.29.6443	10.1063/1.447334	235
10.1103/PhysRevLett.33.244	10.1016/0550-3213(82)90035-9	200
10.1016/0021-9991(76)90078-4	10.1016/0021-9991(77)90098-5	134
10.1103/PhysRevA.33.3628	10.1063/1.1674820	153
10.1103/PhysRevB.33.8822	10.1063/1.433731	263
10.1103/PhysRevB.33.8822	10.1021/ja00544a007	201
10.1103/PhysRevB.33.8822	10.1063/1.448799	637
10.1103/PhysRevB.33.8822	10.1063/1.449486	437
10.1103/PhysRevB.33.8822	10.1063/1.440939	321
10.1103/PhysRevB.33.8822	\N	201
10.1103/PhysRevB.33.8822	10.1016/0301-0104(81)85090-2	240
10.1103/PhysRevLett.50.1427	10.1103/PhysRevD.12.1502	159
10.1103/PhysRevLett.50.1427	10.1103/PhysRevLett.44.912	237
10.1103/PhysRevLett.50.1427	10.1103/PhysRevD.23.165	156
10.1016/0020-0255(78)90019-1	10.1016/0165-0114(78)90029-5	196
10.1103/PhysRevD.15.996	10.1016/0550-3213(77)90277-2	167
10.1016/0009-2541(77)90057-2	10.1016/0012-821X(75)90088-6	208
10.1016/0009-2541(77)90057-2	10.1016/0012-821X(80)90116-8	482
10.1021/ja00856a001	10.1016/0009-2614(72)85099-1	248
10.1016/0550-3213(80)90019-X	10.1016/0370-2693(80)90909-0	253
10.1007/BF00276494	10.1007/BF00276493	391
10.1016/S0040-4039(00)91094-3	10.1021/jo00979a024	238
10.1016/S0040-4039(00)91094-3	10.1016/S0040-4039(01)95429-2	176
10.1007/BF01405730	\N	141
10.1016/0550-3213(88)90193-9	10.1103/PhysRevD.37.3406	1304
10.1016/0550-3213(88)90193-9	10.1103/RevModPhys.61.1	492
10.1063/1.433731	10.1063/1.438955	616
10.1016/0009-2614(88)87412-8	10.1016/0003-4916(74)90333-9	160
10.1007/BF01114537	10.1063/1.444267	287
10.1007/BF01114537	10.1063/1.449486	230
10.1103/RevModPhys.64.1045	10.1021/j100203a036	209
10.1037/0033-2909.112.1.155	10.1037/0033-2909.86.3.638	177
10.1037/0033-295X.98.2.224	10.1016/0749-5978(91)90020-T	161
10.1016/0047-2727(72)90010-2	10.1016/0047-2727(74)90037-1	346
10.1021/ja00504a009	10.1016/0022-2860(90)80287-T	148
10.1103/PhysRevLett.46.1351	10.1038/248030a0	263
10.1103/PhysRevLett.46.1351	10.1007/BF02345020	315
10.1063/1.455556	10.1103/PhysRevA.33.3742	154
10.1063/1.455556	10.1016/0003-4916(74)90333-9	202
10.1103/PhysRevA.4.2019	10.1103/PhysRevA.5.1372	368
10.1016/0009-2614(88)85250-3	10.1080/00268977000101561	321
10.1126/science.220.4598.671	10.1093/biomet/57.1.97	295
10.1126/science.220.4598.671	10.1214/ss/1177011077	146
10.1103/PhysRevA.33.3742	10.1002/qua.560080106	129
10.1063/1.438955	10.1063/1.448975	933
10.1063/1.438955	10.1021/ja00544a007	250
10.1063/1.438955	10.1021/ar00072a001	264
10.1063/1.438955	\N	177
10.1063/1.438955	10.1016/0301-0104(81)85090-2	393
10.1063/1.448975	10.1021/ja00544a007	274
10.1063/1.448975	10.1021/ar00072a001	389
10.1063/1.448975	10.1063/1.447079	311
10.1063/1.448975	10.1063/1.456010	315
10.1063/1.448975	10.1016/0301-0104(81)85090-2	358
10.1063/1.448975	10.1016/0009-2614(80)80628-2	245
10.1103/PhysRevB.39.5566	10.1063/1.447334	157
10.1103/PhysRevD.12.1502	10.1103/PhysRevD.11.703.2	124
10.1016/0010-4655(85)90100-6	10.1093/imamat/18.2.189	116
10.1088/0022-3719/3/2/010	10.1103/PhysRevB.5.4709	361
10.1103/PhysRevLett.44.912	10.1103/PhysRevLett.57.961	221
10.1007/BF01718440	10.1007/BF00124924	386
10.1016/0021-9797(75)90018-1	\N	277
10.1021/jo00170a070	10.1016/S0040-4020(01)97963-3	166
10.1007/BF01208266	10.1103/PhysRevD.7.2333	233
10.1007/BF01208266	10.1007/BF02345020	267
10.1007/BF01389058	10.1002/cpa.3160310304	148
10.1007/BF01587695	10.1002/cjce.5450550619	772
10.1017/S0021859600063048	10.1017/S0021859600086305	248
10.1037/0033-2909.84.5.888	\N	119
10.1016/0370-2693(83)91254-6	10.1016/0370-2693(83)91253-4	234
10.1007/BF01589116	10.1090/S0025-5718-1980-0572855-7	224
10.1016/0021-9991(77)90098-5	10.1080/00268978800101881	224
10.1021/ja00544a007	10.1063/1.456153	261
10.1021/ja00544a007	10.1007/BF00533485	287
10.1021/ja00544a007	10.1080/00268977000101561	312
10.1016/0550-3213(86)90237-3	10.1016/0550-3213(85)90645-5	102
10.1007/BF02104500	10.1215/S0012-7094-89-05839-0	148
10.1016/0550-3213(81)90430-2	10.1016/0550-3213(83)90652-1	175
10.1063/1.448799	10.1063/1.447079	254
10.1063/1.448799	10.1063/1.445134	200
10.1063/1.448799	10.1016/0301-0104(81)85090-2	264
10.1063/1.448799	10.1016/0009-2614(80)80628-2	242
10.1063/1.456153	10.1021/ar00072a001	223
10.1063/1.456153	10.1063/1.449360	124
10.1038/299802a0	10.1016/0375-9601(82)90084-6	701
10.1007/BF00533485	10.1021/ar00072a001	333
10.1007/BF00533485	\N	183
10.1007/BF00533485	10.1080/00268977400100711	293
10.1007/BF00533485	10.1016/0301-0104(81)85090-2	515
10.1007/BF01857727	10.1007/3-540-10003-2_104	196
10.1016/0550-3213(82)90035-9	10.1103/PhysRevD.20.2619	101
10.1007/BF01608497	10.1007/BF02345020	497
10.1103/PhysRevD.7.2333	10.1007/BF02757029	560
10.1063/1.448118	10.1080/00268978300102851	297
10.1063/1.448118	10.1080/00268978800101881	120
10.1021/ar00072a001	10.1063/1.449486	177
10.1021/ar00072a001	10.1016/0009-2614(93)80086-5	205
10.1021/ar00072a001	10.1002/jcc.540040303	141
10.1007/BF02401406	10.1021/ic50197a006	373
10.1007/BF02401406	\N	526
10.1007/BF02401406	10.1002/qua.560100211	315
10.1126/science.172.3983.567	10.1107/S0567739476001551	272
\N	10.1038/238037a0	120
10.1021/ja00246a021	10.1038/238037a0	217
10.1021/ja00260a006	10.1080/00268977000101561	116
10.1016/0009-2614(72)85099-1	10.1063/1.430994	240
10.1021/ic50196a034	10.1021/ic50197a006	467
10.1021/ic50196a034	\N	237
10.1021/ic50197a006	\N	245
10.1063/1.464397	10.1016/0021-9991(83)90014-1	303
10.1021/ja00850a018	10.1063/1.440939	238
10.1007/BF00310745	10.1144/GSL.SP.1989.042.01.19	133
10.1007/BF02294361	10.1093/biomet/76.2.297	133
10.1007/BF01457454	10.1007/BF02579403	290
10.1007/BF01011339	10.1007/BF02650179	225
10.1007/BF02418013	10.4310/jdg/1214433725	369
10.1007/BF02291575	10.1007/BF02291817	425
10.1007/BF02291575	10.1037/0033-2909.103.3.411	125
10.1007/BF01395931	10.1093/imamat/18.2.189	109
10.1007/BF02310791	10.1016/0024-3795(77)90069-6	331
10.1063/1.447334	10.1002/jcc.540040211	249
10.1103/PhysRevA.33.1134	10.1209/0295-5075/4/9/004	226
10.1103/PhysRevLett.47.1927	10.1103/PhysRevB.33.5186	169
10.1103/PhysRevLett.27.1192	\N	276
10.1016/0003-4916(74)90333-9	10.1002/qua.560080106	163
10.1088/0022-3719/13/10/012	10.1088/0022-3719/15/23/020	254
10.1088/0022-3719/13/10/012	10.1107/S0108768190006887	234
10.1088/0022-3719/15/23/020	10.1107/S0108768190006887	265
10.1063/1.449360	10.1063/1.445134	493
10.1063/1.438728	10.1063/1.1679012	272
10.1063/1.1673824	\N	188
10.1063/1.1679522	10.1145/362248.362275	338
\N	10.1002/jcc.540111013	167
\N	10.1016/0009-2614(80)80628-2	636
10.1038/248030a0	10.1007/BF02757029	258
10.1016/0021-9045(89)90041-5	10.1090/S0002-9939-1978-0507327-1	200
\N	10.1016/0749-5978(91)90020-T	626
\N	10.1111/j.1559-1816.1992.tb00945.x	376
10.1016/0003-682X(70)90031-9	10.1250/ast.11.19	163
10.1080/00268977400100711	10.1080/00268978000103631	208
10.1037/0033-2909.103.3.411	10.1016/0749-5978(91)90020-T	1204
10.1037/0033-2909.103.3.411	\N	1092
10.1037/0033-2909.103.3.411	10.1287/isre.2.3.192	398
10.1037/0033-2909.103.3.411	10.1287/isre.2.3.173	222
10.1037/0033-2909.103.3.411	10.1108/EUM0000000004784	225
10.1037/0033-2909.103.3.411	10.1177/135910457000100301	219
10.1037/0033-2909.103.3.411	10.1002/smj.4250100107	187
10.1037/0033-2909.103.3.411	10.1002/smj.4250050306	218
10.1037/0033-2909.103.3.411	10.1111/j.1559-1816.1992.tb00945.x	287
10.1016/0304-405X(76)90026-X	10.2307/2297968	460
10.1016/0304-405X(76)90026-X	10.1111/j.1540-6261.1991.tb04620.x	233
10.1016/0304-405X(76)90026-X	10.2307/2937861	194
10.1016/0021-9991(88)90002-2	10.1016/0021-9991(88)90177-5	269
10.1016/0022-247X(91)90164-U	10.1080/00036819008839989	230
10.1016/0749-5978(91)90020-T	10.1287/isre.3.1.60	374
10.1016/0165-0114(86)90026-6	10.1080/00207727808941724	169
10.1016/0009-2541(80)90020-0	10.1144/GSL.SP.1989.042.01.19	146
10.1016/0304-405X(79)90015-1	10.1016/0304-405X(77)90015-0	158
10.1016/0304-4076(77)90052-5	10.1111/j.1467-8489.1977.tb00204.x	408
10.1007/BF02723327	10.1177/014920638601200408	721
10.1007/BF02723327	10.1111/j.2044-8325.1990.tb00506.x	138
10.1007/BF02757029	10.1007/BF02345020	515
10.1007/BF02924890	10.1090/S0002-9939-1978-0507327-1	439
10.1037/0022-3514.51.1.110	10.2307/1964229	195
10.1037/h0037350	10.1080/00031305.1985.10479383	221
10.1287/isre.3.1.60	10.1111/j.1559-1816.1992.tb00945.x	206
10.1144/GSL.SP.1984.016.01.06	10.1144/GSL.SP.1989.042.01.19	129
10.1287/isre.2.3.192	10.1111/j.1559-1816.1992.tb00945.x	456
10.1144/GSL.SP.1989.042.01.19	10.1144/GSL.SP.1986.019.01.04	256
10.1144/GSL.SP.1989.042.01.19	10.1130/0091-7613(1992)020<0339:ROMCIT>2.3.CO;2	229
10.1093/biomet/70.1.41	10.1080/00031305.1985.10479383	1146
10.1016/0076-6879(88)60109-1	10.1351/pac198759020257	154
10.2307/2297968	10.1111/j.1540-6261.1984.tb03646.x	161
10.1121/1.394536	10.1121/1.392911	253
10.1080/00268977000101561	10.1016/0301-0104(81)85090-2	358
10.1080/00268977000101561	10.1002/anie.198406271	181
10.1080/01621459.1982.10477803	10.1080/01621459.1984.10477110	205
10.1177/014920639101700108	10.3386/w3210	127
10.1177/014920639101700108	10.1287/mnsc.29.7.770	368
10.1080/01621459.1974.10480137	10.1080/0022250X.1990.9990069	117
10.1002/sapm197757293	10.1016/0362-546X(80)90016-4	130
10.1007/3-540-09519-5_73	10.1145/322217.322225	390
10.1107/S0567739478001886	10.1107/S0567739476000533	303
10.1002/jcc.540111013	10.1016/0009-2614(80)80628-2	299
10.1080/00268978400101201	10.1002/jcc.540040211	169
10.1080/00031305.1985.10479383	10.1080/01621459.1984.10478078	370
10.1108/eb046814	10.1002/(SICI)1097-4571(199009)41:6<391::AID-ASI1>3.0.CO;2-9	328
10.1090/S0025-5718-1985-0777282-X	10.1090/S0025-5718-1987-0866109-5	224
10.1090/S0025-5718-1987-0866113-7	10.1007/3-540-39799-X_31	196
10.1090/S0002-9939-1972-0298500-3	10.1017/S0004972700028884	217
10.1177/014920638601200408	10.1002/smj.4250140105	200
10.1177/014920638601200408	10.1002/smj.4250100107	229
10.1177/014920638601200408	10.1002/smj.4250050207	382
10.1177/014920638601200408	10.1002/smj.4250050306	225
10.2307/2330757	10.2307/2330894	255
10.1111/j.1752-1688.1985.tb05379.x	10.1111/j.1467-9892.1987.tb00438.x	165
10.1002/jcc.540110605	10.1002/jcc.540130812	183
10.1002/smj.4250040304	10.1287/mnsc.29.7.770	167
10.1002/smj.4250100107	10.1002/smj.4250050207	194
10.1002/smj.4250050207	10.1002/smj.4250050306	188
10.1002/smj.4250050207	10.1287/mnsc.29.7.770	162
10.1145/512760.512770	10.1145/512950.512973	515
